# Supplementary material for: Mitigating heavy metals leachability from CO2 carbonated coal-based solid waste backfill in high-salinity environments via biochar-clay-nanomaterial synergistic modification
Source: Royal Society of Chemistry journal article supplement (doi:10.1039/d5ra09892k), 2026-04-22
Supplement: d5ra09892k1.xlsx [file d5ra09892k1.xlsx]

## Sheet: XRD patterns
2T/2θ	Dried									Immer-3									Immer-60
	CCB	CCB-R	CCB-N	CCB-S	CCB-RN	CCB-RS	CCB-Rn	CCB-RNn	CCB-RSn	CCB	CCB-R	CCB-N	CCB-S	CCB-RN	CCB-RS	CCB-Rn	CCB-RNn	CCB-RSn	CCB	CCB-R	CCB-N	CCB-S	CCB-RN	CCB-RS	CCB-Rn	CCB-RNn	CCB-RSn
5	105	104	105	111	104	112	97	98	105	104	103	88	95	105	92	100	106	102	113	102	110	103	100	104	98	101	89
5.02	105	104	105	111	104	112	97	98	105	104	103	88	95	105	92	100	106	102	113	102	110	103	100	104	98	101	89
5.04	105	104	105	111	104	112	97	98	105	104	103	88	95	105	92	100	106	102	113	102	110	103	100	104	98	101	89
5.06	104	111	101	107	103	111	98	94	106	101	97	87	97	109	86	97	104	100	111	109	108	101	101	101	97	96	92
5.08	102	105	101	110	103	103	94	94	109	103	92	86	97	108	84	95	105	97	105	107	108	104	101	103	99	100	94
5.1	102	105	100	112	99	100	95	86	111	100	98	88	97	107	92	94	105	98	108	104	105	106	100	98	95	99	94
5.12	105	103	102	110	98	98	95	94	106	98	92	87	102	110	96	93	104	96	104	108	102	105	95	99	94	103	96
5.14	106	104	103	112	98	104	97	92	109	98	90	95	96	110	94	92	110	89	106	108	101	106	98	102	95	108	98
5.16	108	101	101	111	99	102	96	91	106	101	89	95	101	107	98	92	110	91	106	107	97	108	96	104	94	113	97
5.18	112	101	99	110	97	102	96	93	102	103	90	97	102	106	99	93	108	92	106	107	94	111	93	102	92	113	101
5.2	114	102	97	109	98	104	94	97	101	101	89	96	103	103	101	93	106	91	105	106	97	108	92	106	92	118	98
5.22	114	100	93	110	95	106	94	96	102	101	91	95	102	105	101	92	104	91	107	103	98	106	92	107	90	118	97
5.24	116	102	94	108	93	109	92	97	103	105	95	95	99	105	104	93	107	95	110	100	97	106	94	104	86	117	96
5.26	113	104	91	105	93	106	93	97	100	107	92	93	98	103	98	91	103	95	110	97	99	104	96	101	83	113	93
5.28	112	100	93	102	93	106	91	98	98	110	95	89	97	101	91	92	101	98	110	95	100	102	96	98	84	112	94
5.3	107	99	93	104	95	105	90	95	96	106	98	88	96	99	88	94	101	101	110	89	99	100	97	95	83	109	89
5.32	107	98	97	105	96	102	88	98	95	105	103	84	98	99	87	94	102	102	107	89	101	99	98	91	84	106	86
5.34	101	96	98	105	95	101	88	97	94	103	102	83	95	99	83	94	105	101	102	87	104	101	98	89	83	106	89
5.36	99	94	101	107	94	106	90	95	91	102	100	82	93	98	83	92	107	102	99	88	105	98	99	86	82	104	91
5.38	98	93	100	109	95	107	93	97	89	102	97	84	93	97	84	95	107	100	98	90	107	94	96	85	86	103	90
5.4	95	93	99	106	97	102	92	94	92	104	96	82	92	97	84	97	104	101	96	91	109	94	93	84	84	101	89
5.42	97	91	101	105	97	100	91	96	91	105	91	83	93	94	88	97	102	102	96	94	108	91	93	84	87	104	90
5.44	97	90	99	101	100	95	91	94	91	107	89	80	95	93	89	98	100	101	93	94	107	91	92	87	90	105	94
5.46	95	91	98	105	98	95	90	95	95	110	86	83	97	92	91	95	96	99	90	94	108	93	92	86	88	106	94
5.48	96	92	97	104	100	95	89	93	99	108	86	80	98	93	94	91	93	96	91	95	110	90	91	87	90	108	92
5.5	94	89	95	101	96	94	89	91	100	108	84	80	99	96	96	88	90	95	91	93	108	90	91	90	88	107	92
5.52	95	90	95	95	95	90	86	92	100	106	82	81	98	96	93	88	88	92	94	91	103	91	95	87	89	107	91
5.54	93	91	96	94	93	89	88	92	97	102	81	79	97	93	86	85	85	90	98	87	101	89	94	86	89	105	91
5.56	94	93	96	93	89	89	88	90	98	102	85	80	99	94	85	85	87	87	100	86	98	88	94	89	90	103	91
5.58	93	94	95	95	90	92	88	85	97	94	87	81	103	96	82	85	89	83	100	87	92	92	94	89	92	99	89
5.6	95	98	94	93	88	93	89	86	94	90	89	81	102	98	81	84	91	85	99	86	92	96	95	92	93	99	91
5.62	95	101	92	91	87	97	88	86	90	90	89	80	100	102	79	86	92	84	98	86	91	98	95	92	92	98	90
5.64	96	101	91	94	86	97	89	85	88	90	92	79	101	99	78	86	91	85	100	88	92	97	92	90	90	97	90
5.66	95	101	89	94	89	95	92	85	83	91	92	82	101	98	77	90	92	88	99	89	93	94	90	90	90	100	88
5.68	96	104	90	92	91	92	90	82	84	93	93	82	98	98	77	88	95	92	98	90	95	94	88	89	87	105	88
5.7	98	103	90	93	92	95	87	83	84	93	89	84	98	98	78	86	99	92	99	87	96	91	91	90	87	105	91
5.72	97	101	89	91	94	92	85	79	85	98	89	82	94	95	76	88	104	91	97	86	96	90	88	88	86	105	87
5.74	97	101	90	94	94	92	81	78	88	97	90	81	92	92	77	87	101	94	96	87	96	87	87	85	82	108	82
5.76	97	99	89	91	95	93	78	80	89	97	88	80	92	89	77	85	100	94	93	85	96	83	84	82	81	106	82
5.78	92	95	89	89	93	89	76	79	90	94	86	81	89	82	76	83	99	90	95	82	94	82	80	83	81	104	81
5.8	91	93	90	87	90	86	75	82	90	93	86	77	87	79	74	80	97	88	100	81	91	80	79	79	81	102	84
5.82	89	92	89	89	87	86	75	82	94	94	84	77	82	76	74	79	97	86	102	76	92	76	75	78	82	100	84
5.84	86	89	87	88	84	86	75	79	98	93	83	76	80	79	76	79	98	87	102	74	91	76	71	78	82	96	82
5.86	83	88	85	89	84	87	76	80	97	89	82	76	82	81	74	77	96	88	103	77	87	77	71	77	84	92	82
5.88	83	90	83	87	83	87	77	80	96	88	84	76	79	82	73	78	92	92	105	74	88	81	69	78	86	94	79
5.9	86	91	84	89	87	86	78	81	95	92	84	74	81	83	71	76	89	90	105	76	89	82	70	76	81	92	79
5.92	83	91	83	89	87	84	82	83	95	90	85	73	82	81	72	74	86	93	105	78	88	82	72	74	80	93	79
5.94	83	91	86	88	90	82	81	83	91	91	85	72	81	84	74	74	85	96	102	76	90	82	76	74	80	93	79
5.96	84	93	84	89	89	81	81	83	90	90	83	70	82	86	76	74	84	95	103	77	92	85	78	76	77	93	82
5.98	85	90	84	91	88	82	81	83	89	90	81	70	83	89	77	75	87	95	101	78	89	86	82	77	75	90	81
6	85	91	84	90	91	78	81	80	87	91	83	66	81	89	75	76	87	93	101	79	91	87	82	73	75	90	78
6.02	87	89	82	91	89	78	80	82	85	90	83	68	83	87	74	76	88	91	99	79	88	84	82	75	72	91	80
6.04	88	88	81	90	88	78	80	83	84	90	83	71	85	85	74	76	90	88	95	79	89	83	81	74	72	91	81
6.06	89	83	82	88	86	76	83	83	82	89	82	76	85	80	73	77	90	82	94	80	88	84	76	79	72	90	81
6.08	89	84	82	84	83	77	81	83	81	92	86	78	84	80	75	75	92	80	95	81	87	85	79	79	73	91	80
6.1	89	85	84	85	83	77	80	82	82	91	85	82	83	79	73	78	94	79	93	80	88	83	78	79	75	92	76
6.12	87	85	85	84	84	77	79	79	83	89	86	81	83	81	72	78	97	82	95	81	86	84	79	79	75	90	73
6.14	87	84	85	82	80	77	80	78	80	87	87	84	82	80	71	75	99	82	96	81	86	83	80	80	77	90	70
6.16	89	84	86	81	81	78	78	73	82	88	87	83	81	77	72	75	98	81	94	80	89	84	78	77	79	93	70
6.18	88	85	88	83	85	80	77	74	80	86	84	82	82	77	73	73	95	80	94	78	87	82	80	75	79	91	69
6.2	83	86	90	80	83	83	75	76	79	84	81	80	82	76	79	71	92	82	92	77	85	83	79	75	79	90	71
6.22	81	84	89	81	83	83	73	74	77	86	78	77	83	80	78	70	88	82	90	74	91	86	78	75	80	90	74
6.24	76	84	87	82	82	83	74	73	76	87	75	75	82	78	79	71	82	83	93	73	89	88	78	78	77	91	75
6.26	75	82	88	83	82	85	74	73	77	86	73	74	81	80	77	72	82	83	92	73	87	89	81	76	78	90	75
6.28	75	83	88	84	84	87	73	76	76	89	75	72	78	80	75	71	82	80	91	72	91	86	79	76	77	89	78
6.3	76	82	83	86	82	88	72	78	77	89	75	74	79	82	76	72	82	79	87	72	90	83	76	79	78	88	78
6.32	78	84	82	82	81	88	73	77	77	87	76	75	79	81	75	74	79	80	84	74	92	84	74	81	78	87	77
6.34	79	84	79	82	78	89	77	78	74	88	76	76	81	81	75	77	77	79	81	75	92	83	72	82	79	85	75
6.36	78	87	79	81	74	88	74	77	73	90	80	76	82	84	74	77	80	79	83	79	89	84	78	79	80	85	74
6.38	79	88	79	84	76	87	76	77	72	88	80	73	84	87	73	78	83	77	81	81	86	84	77	77	81	85	69
6.4	81	87	78	82	73	85	76	75	71	87	81	70	84	88	69	78	85	78	80	78	87	84	76	75	80	84	66
6.42	81	83	77	80	72	82	75	72	68	88	81	69	82	86	67	78	91	77	81	76	86	83	73	74	82	83	66
6.44	83	84	79	79	72	81	72	68	71	86	82	68	84	83	67	79	92	77	78	73	86	82	71	72	82	86	69
6.46	84	84	80	79	74	81	73	69	67	86	80	70	87	83	67	78	91	79	80	70	84	83	73	73	83	83	69
6.48	84	82	81	78	74	80	75	69	68	86	76	71	88	81	72	75	94	77	78	70	83	82	70	73	81	83	74
6.5	84	77	80	77	77	76	77	66	67	86	73	69	90	81	72	78	92	76	80	69	85	80	68	72	77	85	76
6.52	82	75	82	79	79	72	78	66	68	86	70	70	87	78	73	78	88	76	82	69	81	77	70	72	74	84	76
6.54	83	73	83	79	80	71	76	68	70	86	69	72	84	76	74	74	90	73	83	72	82	76	73	70	71	81	79
6.56	83	73	85	78	83	71	78	71	73	86	69	70	79	76	77	72	89	71	81	74	83	73	72	73	68	79	80
6.58	82	72	82	76	83	69	78	71	76	84	69	70	78	80	79	72	86	72	79	74	81	72	73	73	66	78	78
6.6	82	74	81	75	82	70	79	70	75	83	70	71	78	79	78	72	80	73	78	76	82	73	76	72	64	77	77
6.62	82	74	81	78	79	72	80	72	74	82	70	71	78	80	79	72	77	73	75	77	78	72	75	68	63	78	75
6.64	82	75	81	78	79	73	80	73	76	80	71	71	77	85	79	71	76	70	76	79	75	76	77	65	61	78	73
6.66	81	75	80	78	79	72	83	72	74	79	72	70	78	85	78	70	75	69	74	77	74	77	75	63	61	81	68
6.68	80	73	79	77	77	74	80	72	72	78	73	70	75	83	72	72	74	69	74	71	75	81	74	62	60	82	66
6.7	81	73	78	77	77	76	78	69	72	80	76	68	72	77	71	72	76	71	73	70	72	81	73	63	61	82	64
6.72	81	74	81	77	75	80	78	71	74	76	76	73	72	74	73	72	77	74	73	69	73	81	76	63	64	82	63
6.74	79	75	81	79	76	81	77	73	72	77	75	73	71	74	73	71	80	75	77	69	73	81	77	60	68	83	64
6.76	76	73	81	80	75	80	77	71	74	75	71	74	68	75	76	72	83	74	76	69	73	79	74	60	68	81	66
6.78	74	70	80	80	74	79	77	69	71	77	69	72	67	75	73	75	84	76	79	71	73	78	74	62	68	80	66
6.8	71	71	78	81	72	79	73	69	70	78	66	74	65	74	70	72	87	78	82	73	75	75	75	61	70	83	66
6.82	68	72	77	77	71	79	72	68	66	81	67	75	63	74	72	71	90	80	84	74	76	75	75	66	73	83	67
6.84	68	70	76	75	71	81	73	69	67	80	68	74	66	77	72	73	88	83	83	74	76	73	75	69	76	82	69
6.86	67	71	72	74	71	81	70	69	67	80	70	75	71	77	69	71	85	82	82	75	76	72	75	70	77	84	70
6.88	68	70	72	74	69	81	68	68	66	82	72	74	75	77	68	73	78	82	81	76	77	72	74	73	78	84	70
6.9	70	69	72	76	68	81	68	69	66	81	74	72	81	76	68	72	77	79	79	74	77	70	71	73	76	85	71
6.92	71	69	72	74	71	80	67	67	68	81	77	70	86	77	70	72	74	78	81	72	77	72	71	76	76	85	73
6.94	74	70	71	74	70	79	65	67	66	81	78	69	90	76	70	72	72	79	81	68	75	71	68	75	78	88	73
6.96	77	68	72	75	72	80	64	68	67	79	77	68	90	75	70	72	74	77	77	67	76	73	67	75	77	89	72
6.98	78	70	75	79	73	79	62	68	70	79	78	67	89	71	71	72	72	79	74	69	75	73	67	73	78	90	70
7	77	72	76	83	73	80	60	71	70	75	78	69	87	70	73	72	73	79	73	67	76	75	67	68	76	87	69
7.02	78	73	79	85	74	79	58	74	69	76	77	68	84	69	73	72	76	77	74	69	77	78	66	65	73	89	70
7.04	79	72	81	87	74	77	58	74	69	75	73	70	80	72	73	71	75	76	73	72	77	79	65	66	69	86	69
7.06	80	75	80	87	72	77	59	75	67	77	71	69	75	73	70	70	76	76	76	73	76	80	66	68	69	88	66
7.08	75	77	77	86	72	79	57	74	66	76	71	69	75	73	70	69	76	74	77	73	79	77	64	65	68	88	66
7.1	73	76	77	87	74	79	59	73	62	77	72	69	75	76	71	68	75	75	76	73	79	78	62	68	68	87	67
7.12	72	76	74	89	74	83	62	73	63	76	70	68	74	78	68	68	74	75	75	75	76	77	62	66	63	84	68
7.14	70	77	73	88	76	83	63	70	64	78	70	68	70	77	66	67	74	73	77	76	79	76	64	65	59	84	67
7.16	66	76	73	90	73	84	66	70	65	80	71	69	69	77	66	67	72	74	77	74	78	75	63	67	56	79	69
7.18	65	75	70	94	73	84	67	67	64	82	72	65	71	75	63	64	74	74	76	72	78	74	62	68	53	73	70
7.2	63	75	67	89	70	83	68	64	67	81	72	66	71	76	64	64	73	75	80	72	75	74	63	73	55	71	68
7.22	64	77	66	86	68	81	68	65	70	82	70	67	73	79	65	64	75	75	78	70	73	71	64	74	57	72	66
7.24	63	76	66	87	67	79	68	64	71	80	70	67	70	78	65	65	75	75	77	68	72	70	64	72	60	72	66
7.26	62	77	64	88	66	77	66	63	72	80	71	66	71	77	67	65	73	76	75	66	70	68	64	69	63	72	65
7.28	65	73	64	85	66	74	65	65	69	79	69	67	71	74	65	65	72	73	76	64	68	68	63	69	62	71	64
7.3	68	69	66	83	68	69	65	69	69	78	67	66	75	74	66	62	73	71	77	66	67	67	65	69	65	72	65
7.32	69	68	68	82	69	67	64	69	69	75	67	65	75	77	67	63	71	70	75	68	67	64	65	68	68	73	62
7.34	68	68	67	79	66	67	61	69	67	74	65	62	75	76	64	63	71	70	74	66	67	64	64	67	70	72	63
7.36	68	67	67	76	69	67	59	68	65	72	68	59	79	75	64	64	66	65	73	65	69	63	65	65	69	70	65
7.38	67	68	69	76	69	69	59	65	63	71	66	57	80	73	64	62	67	68	72	63	69	67	64	67	66	72	67
7.4	67	72	68	74	70	72	61	63	63	70	65	57	80	75	62	66	67	69	71	62	70	67	66	66	63	75	67
7.42	68	73	70	74	71	72	61	61	64	72	65	56	79	72	64	65	69	72	71	62	74	70	69	68	61	78	70
7.44	66	75	72	75	68	72	61	62	61	74	66	57	79	71	62	63	69	72	69	65	71	72	66	67	61	76	70
7.46	67	76	70	76	66	73	61	61	62	75	66	54	79	71	60	64	71	73	69	66	75	75	64	66	60	76	68
7.48	65	80	70	70	65	73	62	61	67	75	67	56	82	72	61	65	70	71	69	67	73	74	63	68	59	79	66
7.5	66	81	69	69	65	73	63	61	69	76	65	57	82	72	63	65	70	71	66	71	71	76	63	68	62	78	65
7.52	66	78	69	70	66	71	63	60	68	76	66	58	78	71	64	68	69	69	67	69	67	76	64	65	63	79	67
7.54	67	75	66	67	67	70	64	61	67	72	65	59	77	71	67	69	72	69	65	67	67	77	61	64	64	80	66
7.56	66	69	67	68	69	68	65	63	65	71	66	60	78	68	67	70	71	67	64	66	68	73	63	64	64	79	65
7.58	65	66	66	67	67	66	64	63	65	70	66	60	78	67	69	69	69	66	60	67	69	73	63	64	64	78	65
7.6	63	64	66	68	67	65	63	62	64	68	68	61	74	67	70	70	69	67	59	64	69	70	61	62	64	77	63
7.62	61	62	67	69	66	66	61	62	64	67	69	62	71	67	71	66	71	66	60	58	71	70	61	61	63	75	65
7.64	62	62	67	68	65	65	61	63	65	65	71	61	72	65	70	65	69	63	62	57	73	70	63	61	61	73	65
7.66	58	64	64	68	63	65	59	62	66	67	71	62	71	67	69	62	72	67	62	54	71	70	61	63	58	73	66
7.68	57	63	64	67	61	63	58	62	64	68	71	62	71	69	68	61	72	68	61	51	71	70	60	64	58	74	63
7.7	58	65	68	68	58	63	56	64	64	70	71	63	70	68	67	57	72	67	60	52	68	72	59	64	56	72	62
7.72	57	67	69	69	57	63	56	66	63	70	71	64	71	69	62	54	73	66	61	53	70	69	56	62	57	69	63
7.74	58	68	69	71	59	63	57	68	65	72	71	63	72	68	59	54	72	65	64	56	72	69	54	61	57	68	61
7.76	57	70	70	70	62	61	59	67	67	71	70	62	74	67	55	55	70	63	62	59	67	69	52	61	56	66	63
7.78	61	68	70	72	62	60	62	65	65	71	68	63	74	68	58	59	68	61	66	62	66	71	56	61	57	65	60
7.8	64	66	70	71	67	62	62	66	60	70	68	63	74	71	58	60	67	61	67	62	65	73	57	58	55	63	61
7.82	65	66	68	68	66	62	64	64	58	68	66	62	73	69	57	64	67	62	67	62	67	71	54	59	55	64	60
7.84	65	65	68	73	67	63	62	63	57	71	64	64	71	67	57	65	61	61	66	63	69	67	55	61	55	65	60
7.86	65	65	67	73	66	63	63	59	57	73	62	65	70	67	59	64	60	62	67	64	68	66	56	65	54	67	60
7.88	65	67	67	73	66	65	66	59	58	73	64	65	65	65	60	66	61	63	69	64	70	64	57	63	55	67	58
7.9	66	65	66	72	68	68	64	57	58	73	61	65	63	64	61	66	64	64	69	62	71	64	60	63	54	70	58
7.92	67	66	63	73	65	69	63	55	57	73	60	63	61	62	58	68	65	65	71	63	71	64	60	65	56	68	56
7.94	67	66	59	75	63	71	61	52	59	75	60	63	59	61	57	66	66	68	70	59	70	64	61	66	57	67	56
7.96	65	64	59	73	60	71	62	51	59	76	61	64	59	60	58	64	67	68	71	58	69	63	63	67	59	66	52
7.98	65	66	60	71	59	72	63	54	59	75	62	64	60	60	55	65	69	69	70	57	69	60	64	67	60	64	53
8	63	63	59	74	58	72	63	55	62	75	63	63	62	58	56	66	71	66	72	59	70	54	63	68	59	67	55
8.02	60	63	62	74	61	69	61	56	64	74	62	61	61	58	53	67	71	65	71	62	66	57	64	65	58	67	54
8.04	58	64	62	74	64	70	62	57	65	71	62	59	62	56	53	70	73	66	69	61	64	55	64	60	58	68	55
8.06	58	61	58	72	65	69	63	56	66	72	64	58	61	58	55	70	73	64	71	61	60	57	65	58	57	67	55
8.08	60	60	59	69	69	72	61	59	65	70	64	57	62	58	52	65	73	65	70	61	60	58	62	54	54	65	59
8.1	60	61	58	66	69	71	59	56	65	70	63	57	59	56	51	64	74	65	68	60	63	58	60	55	57	66	59
8.12	60	62	59	66	71	73	58	57	64	71	62	58	58	56	53	61	72	66	66	58	64	58	59	54	57	65	60
8.14	58	64	58	62	70	71	58	57	63	68	64	56	60	55	56	58	73	64	66	60	63	59	60	54	55	63	58
8.16	59	66	58	59	70	71	58	60	60	67	65	58	57	56	57	60	72	62	66	60	66	62	58	52	56	60	57
8.18	60	64	58	61	70	69	56	59	54	66	63	57	56	56	58	56	71	64	65	57	64	64	58	55	57	60	57
8.2	60	63	58	63	66	68	55	58	54	64	63	57	56	58	57	56	71	63	66	57	66	66	57	57	59	59	57
8.22	61	61	58	64	63	65	52	57	55	65	63	56	57	58	59	55	69	62	67	57	66	67	57	59	61	58	56
8.24	62	57	60	65	60	63	52	59	51	66	63	56	58	62	60	55	69	63	69	59	67	70	56	60	60	59	56
8.26	62	54	59	66	58	59	54	59	49	62	61	57	61	68	59	58	67	63	70	60	69	69	57	61	60	61	57
8.28	61	54	59	69	56	55	53	58	51	62	61	58	61	71	63	58	66	59	69	59	66	67	57	63	61	63	58
8.3	59	56	61	67	57	52	54	58	53	60	61	59	62	73	60	58	67	60	70	58	62	67	58	60	63	64	60
8.32	59	58	60	67	59	56	56	59	54	61	61	60	64	72	61	57	69	61	70	57	63	67	58	59	64	66	61
8.34	58	55	57	67	58	54	57	56	57	59	62	59	65	73	60	57	69	60	72	55	61	68	58	59	64	67	61
8.36	60	58	61	69	58	58	56	55	59	61	60	60	67	70	57	54	69	62	71	53	65	69	58	59	65	69	65
8.38	61	64	60	68	58	61	56	51	59	61	61	62	66	68	58	54	71	63	69	52	66	69	58	60	65	69	64
8.4	61	67	60	67	59	63	56	54	61	61	63	61	69	67	58	53	71	62	69	50	66	67	59	59	64	70	62
8.42	60	69	60	63	58	63	55	55	60	60	64	58	70	66	56	51	73	60	69	54	68	65	59	58	61	67	60
8.44	61	71	59	62	60	66	58	56	61	60	61	61	68	63	55	53	73	59	67	57	68	65	57	57	58	65	61
8.46	60	70	60	63	61	65	59	55	60	59	62	59	66	60	52	52	71	62	64	60	69	65	58	58	55	64	58
8.48	60	69	60	62	62	67	59	55	60	60	62	57	65	58	50	53	71	61	62	64	71	66	57	58	53	64	56
8.5	63	68	59	63	64	66	57	55	59	59	60	57	64	55	51	56	70	64	62	68	70	66	55	59	51	63	53
8.52	67	64	58	63	64	64	58	55	55	59	61	55	63	56	51	59	67	66	60	70	68	67	56	59	48	66	54
8.54	66	62	56	62	64	62	57	55	54	59	63	56	63	60	52	61	66	68	59	70	64	64	57	60	51	66	52
8.56	67	64	57	62	64	63	59	57	54	60	65	55	62	61	55	60	64	67	56	69	59	59	55	62	52	64	49
8.58	65	61	57	62	63	62	61	58	55	63	63	54	61	58	52	60	62	68	57	67	58	57	55	61	54	64	48
8.6	64	61	56	61	64	65	61	59	55	62	63	53	63	59	54	59	61	67	58	66	57	57	57	63	55	66	47
8.62	61	59	58	62	61	64	61	58	55	62	62	52	64	61	56	59	58	67	59	62	55	56	57	64	57	69	48
8.64	61	61	61	62	59	65	59	59	57	65	64	53	65	59	55	59	58	65	60	58	54	57	56	62	60	72	51
8.66	62	61	62	62	58	65	58	60	57	68	65	53	64	60	57	58	61	64	63	60	51	57	57	61	59	70	52
8.68	60	60	62	62	58	67	59	62	56	67	65	52	64	60	56	57	60	62	63	59	51	57	60	59	60	72	53
8.7	59	58	62	63	57	64	58	59	56	68	65	54	62	59	53	59	62	59	63	61	53	56	59	56	59	68	55
8.72	59	56	59	62	58	66	60	57	57	67	62	57	62	56	52	61	64	60	63	59	52	58	59	55	58	67	56
8.74	60	55	59	66	58	64	57	55	58	66	62	58	60	55	52	61	64	62	62	60	55	58	60	53	57	64	56
8.76	62	54	58	68	59	63	58	56	57	68	61	59	59	55	52	61	67	62	64	59	58	60	59	51	56	65	56
8.78	63	55	55	68	59	61	56	55	56	65	61	60	58	56	54	63	69	63	63	59	60	59	59	52	55	62	58
8.8	65	51	54	69	57	59	57	52	54	63	63	59	60	57	53	61	71	62	61	56	61	58	61	54	52	60	57
8.82	63	53	55	72	57	61	55	54	54	64	61	59	58	59	53	60	71	63	60	53	62	57	62	54	52	58	55
8.84	64	55	55	71	56	60	60	53	54	65	61	57	60	58	53	59	69	61	57	52	63	58	61	54	51	56	51
8.86	63	56	55	69	55	60	61	51	54	65	59	58	59	58	53	58	67	61	58	50	62	59	60	55	52	57	54
8.88	62	58	55	66	55	59	64	51	53	63	56	56	61	60	54	55	66	60	57	51	62	58	62	55	52	59	54
8.9	61	62	57	64	52	57	65	52	52	63	58	55	62	61	55	55	66	60	58	52	64	58	61	53	52	63	54
8.92	60	62	58	63	52	55	64	54	52	65	59	54	63	60	54	54	67	58	60	54	64	58	60	52	53	66	55
8.94	58	60	59	62	53	55	63	57	50	68	58	52	61	60	54	53	65	60	60	57	62	57	58	53	53	67	57
8.96	57	61	59	60	52	55	62	56	50	65	58	51	57	60	55	54	63	60	58	57	62	55	60	53	55	69	57
8.98	56	58	60	61	53	56	60	56	52	65	59	52	57	60	53	55	64	58	59	59	65	55	60	55	57	68	58
9	58	54	60	59	54	55	58	57	51	64	56	53	58	60	54	55	63	60	59	59	65	55	59	54	60	68	58
9.02	60	55	62	61	57	55	57	57	53	64	58	53	56	60	57	56	63	61	58	60	67	56	56	52	61	67	59
9.04	59	53	63	60	61	54	57	59	55	63	57	53	56	63	59	57	63	60	61	58	68	54	57	51	61	65	58
9.06	59	53	62	60	62	57	54	60	57	59	56	52	54	62	59	58	62	59	60	58	68	55	56	52	60	61	58
9.08	58	52	62	60	61	58	54	59	58	59	57	52	54	59	59	57	61	59	61	55	67	54	56	51	59	61	57
9.1	56	55	61	64	61	60	53	59	57	61	57	54	55	58	59	58	58	62	59	52	64	58	56	50	58	60	56
9.12	56	58	60	64	62	60	55	58	54	61	59	53	57	55	57	59	56	63	59	52	62	58	54	51	59	59	55
9.14	56	61	59	61	60	59	55	55	53	59	59	56	55	56	56	60	54	66	59	52	57	58	53	51	58	58	57
9.16	55	61	59	60	59	59	56	56	49	60	58	54	58	56	54	58	55	68	58	53	56	56	55	52	56	58	58
9.18	55	63	56	59	58	59	56	55	47	62	60	52	59	55	51	57	56	67	60	53	55	56	55	54	52	58	57
9.2	54	62	56	57	57	58	56	56	45	62	61	52	58	56	49	57	58	69	62	52	55	55	55	56	50	58	59
9.22	53	64	55	54	55	59	55	58	45	62	61	52	56	57	48	57	57	67	61	52	56	55	55	57	49	60	59
9.24	55	63	58	53	54	59	53	57	44	61	61	49	57	57	48	54	58	66	60	52	56	53	56	57	49	60	57
9.26	56	60	59	53	57	57	54	56	46	61	61	49	58	56	48	52	60	64	61	55	60	56	57	58	50	59	54
9.28	57	58	61	52	59	57	56	55	46	62	58	49	58	58	48	52	63	63	62	54	62	57	52	54	50	59	53
9.3	58	58	61	50	60	57	57	55	49	61	58	47	58	58	52	54	67	62	60	55	64	60	51	54	50	59	53
9.32	59	59	60	49	60	59	55	54	54	61	57	47	60	56	55	55	69	60	60	56	65	58	52	55	48	59	53
9.34	61	60	59	52	59	62	56	57	59	61	55	47	60	53	53	54	71	59	56	56	65	60	51	55	48	62	53
9.36	62	60	57	53	58	60	55	57	61	61	57	48	61	53	54	54	71	58	56	56	68	60	52	53	51	65	55
9.38	64	61	59	56	56	60	54	58	60	61	56	49	62	53	55	54	71	60	54	55	67	63	54	54	53	66	56
9.4	63	62	60	56	55	59	53	58	58	62	57	48	61	53	52	57	72	59	53	54	66	63	57	55	54	65	55
9.42	65	61	61	55	51	57	51	57	57	62	57	51	59	55	52	58	70	61	51	54	64	63	59	55	54	65	56
9.44	64	59	60	54	51	57	48	57	55	60	56	49	59	56	50	57	72	62	52	55	61	61	60	54	54	65	58
9.46	64	59	60	55	48	53	48	55	54	59	57	48	57	57	51	56	71	60	52	57	60	59	62	54	52	61	57
9.48	66	57	59	56	47	51	47	55	52	56	59	51	57	61	51	54	70	60	53	58	60	56	63	52	50	62	57
9.5	66	58	58	56	47	54	48	55	51	54	58	51	57	64	51	52	67	57	54	59	62	57	64	52	49	63	56
9.52	67	54	62	56	47	51	49	54	49	55	57	50	56	63	52	49	66	57	57	62	61	56	60	51	48	63	52
9.54	67	52	60	55	50	49	48	54	50	56	54	53	57	63	55	47	65	55	60	62	61	57	59	51	48	61	50
9.56	65	52	60	56	52	52	51	52	51	58	54	53	59	65	57	50	66	55	61	62	59	54	59	53	47	61	53
9.58	64	52	61	56	51	54	53	51	54	57	53	53	61	64	58	54	66	56	58	64	60	53	59	55	46	62	50
9.6	64	53	62	56	54	56	54	51	57	58	51	55	62	59	55	55	64	55	57	62	61	51	60	56	46	61	52
9.62	63	53	63	57	56	56	56	54	57	58	50	55	62	58	52	57	63	51	58	59	62	51	59	54	48	65	53
9.64	60	55	63	57	57	57	55	54	56	59	53	55	62	57	51	59	60	53	59	56	64	52	59	54	49	66	54
9.66	58	55	64	57	55	60	54	56	56	61	53	55	60	55	49	60	62	55	61	52	61	53	59	53	52	67	54
9.68	53	56	63	57	56	60	53	57	56	63	56	56	59	54	46	61	64	56	61	50	61	52	59	50	52	65	53
9.7	49	58	62	57	56	58	52	58	56	63	56	58	58	55	45	62	65	57	60	50	60	52	54	50	53	65	53
9.72	47	56	62	55	57	57	51	59	55	63	58	58	58	56	46	60	67	58	59	50	57	51	52	49	50	63	54
9.74	47	58	61	54	55	55	51	58	53	62	60	56	57	58	50	60	66	57	58	51	57	51	52	48	51	60	53
9.76	50	57	59	52	58	54	51	59	54	61	61	56	57	62	50	60	67	57	57	52	56	53	51	48	51	61	52
9.78	50	59	58	52	58	54	51	58	56	59	61	56	56	62	53	59	67	57	59	53	59	55	52	50	53	62	54
9.8	50	57	59	52	60	51	49	60	56	60	60	57	55	63	55	56	65	57	62	54	59	56	51	51	53	58	53
9.82	52	57	58	53	60	50	47	60	57	58	57	56	56	64	55	56	63	57	61	54	59	54	53	55	52	56	54
9.84	53	57	58	58	60	51	48	57	57	58	58	54	57	65	55	58	62	58	61	55	61	50	57	60	51	57	53
9.86	53	56	61	59	59	53	50	56	55	55	55	54	55	66	54	58	62	58	60	55	66	50	57	60	51	57	51
9.88	55	55	61	63	60	51	50	59	53	56	54	54	57	62	52	57	59	56	59	56	67	47	58	61	53	58	50
9.9	55	54	61	65	60	52	50	60	50	58	53	55	55	62	50	54	58	55	60	55	68	46	57	59	54	61	47
9.92	55	54	61	66	60	54	50	60	50	57	56	56	53	60	48	54	60	59	60	53	70	47	56	59	55	60	46
9.94	56	54	60	65	59	56	50	60	51	58	58	55	53	61	45	51	60	58	61	53	68	46	55	55	56	59	45
9.96	55	55	59	67	58	57	50	62	50	58	58	57	55	57	46	49	62	57	60	52	66	46	52	53	54	57	43
9.98	57	54	58	68	57	58	51	62	48	57	59	58	55	59	48	52	61	57	60	52	62	47	50	53	53	57	40
10	58	55	59	66	57	60	51	60	47	58	58	59	52	59	53	51	60	56	59	52	59	48	50	51	52	58	41
10	58	55	58	66	55	60	50	58	48	57	60	58	51	59	55	55	56	56	60	50	57	50	48	48	54	60	41
10	58	56	56	64	55	61	48	57	50	57	59	55	53	58	56	56	56	55	59	49	55	54	47	50	53	60	42
10	58	55	57	63	51	59	48	55	51	56	58	55	51	54	58	56	54	57	59	49	58	55	46	51	52	59	48
10	60	53	56	64	51	59	47	53	51	54	57	54	50	56	58	57	53	57	59	49	58	55	47	49	49	61	49
10.1	62	54	57	63	48	59	46	51	51	55	57	52	51	54	56	59	53	59	57	48	57	54	48	50	48	61	51
10.1	60	55	56	65	47	58	48	49	50	57	59	50	51	53	55	58	55	60	56	49	58	54	50	52	48	64	53
10.1	59	55	57	64	46	56	50	50	50	57	57	50	49	54	52	57	54	60	54	49	58	57	52	53	50	63	54
10.1	59	57	56	64	45	53	52	51	49	61	56	48	51	54	50	59	53	59	52	50	57	54	55	53	51	65	52
10.1	60	57	57	61	48	53	54	52	49	62	55	50	49	56	49	59	54	61	52	50	56	56	55	51	51	65	53
10.2	61	59	58	62	52	52	55	49	51	60	58	49	51	56	47	59	58	63	52	50	56	55	57	53	52	64	51
10.2	62	58	58	60	53	53	55	47	51	61	58	45	53	56	46	56	57	62	52	50	54	53	58	53	52	63	50
10.2	61	61	60	61	50	55	58	49	51	60	58	45	53	55	49	53	60	60	53	50	54	54	60	55	53	63	47
10.2	61	61	58	60	51	55	56	49	52	62	58	47	52	58	49	54	62	59	53	50	52	53	59	55	54	63	46
10.2	58	61	58	60	52	55	55	47	54	63	56	48	54	58	51	51	62	56	54	52	54	53	58	53	52	62	45
10.3	55	61	57	62	53	57	55	46	56	66	57	50	57	57	50	48	62	56	56	51	55	52	55	54	51	62	47
10.3	54	62	55	61	56	58	52	44	57	67	55	48	60	56	49	49	64	55	58	52	57	54	53	53	49	60	49
10.3	55	60	55	62	57	57	51	42	58	64	54	50	59	53	51	50	64	57	56	52	60	53	53	52	50	60	51
10.3	55	57	56	62	58	59	51	42	58	62	51	52	59	54	52	51	64	55	59	53	60	54	51	49	50	63	51
10.3	57	60	55	62	56	60	48	45	56	65	53	54	60	52	50	52	64	57	60	51	59	52	51	48	52	61	52
10.4	56	60	53	61	56	59	50	46	55	65	52	55	59	51	50	51	63	56	58	53	61	53	53	50	53	61	51
10.4	59	63	52	60	56	58	51	47	55	63	53	56	61	53	50	54	60	56	58	50	62	55	56	50	53	59	51
10.4	58	65	51	57	56	58	54	46	56	60	54	57	59	54	51	59	58	55	60	50	62	53	55	51	52	60	51
10.4	59	64	52	57	58	57	55	50	58	57	56	57	59	55	53	60	58	58	62	50	61	56	54	53	51	60	50
10.4	61	65	55	58	55	57	55	49	59	56	58	56	60	55	55	59	57	59	62	49	64	53	55	55	51	61	47
10.5	59	65	55	57	53	57	55	53	57	58	58	56	59	56	55	59	57	58	61	46	62	52	56	56	54	62	49
10.5	59	66	57	56	49	57	58	55	55	62	59	56	57	58	58	58	58	58	61	46	62	52	56	58	53	63	48
10.5	57	62	55	54	50	56	57	55	55	68	59	57	59	61	58	57	59	58	60	47	57	50	55	56	50	60	48
10.5	57	60	53	57	51	55	56	55	57	70	57	56	63	61	58	54	60	58	60	49	58	50	54	53	50	60	47
10.5	54	59	54	60	53	56	56	55	57	71	58	57	64	62	58	51	59	59	58	50	56	48	53	52	50	59	52
10.6	56	57	53	62	54	55	53	56	57	71	57	56	61	63	60	52	62	60	56	52	56	50	53	51	51	58	51
10.6	57	54	55	65	54	53	51	58	56	68	55	55	59	65	59	52	62	61	53	52	54	51	52	50	53	58	50
10.6	59	53	58	65	55	56	49	58	54	68	53	54	59	67	57	49	60	60	54	55	53	52	52	47	54	58	50
10.6	60	55	55	68	56	57	49	58	53	68	57	54	57	67	55	49	62	61	51	54	52	52	53	48	55	57	51
10.6	60	56	56	69	58	58	51	58	52	66	58	51	55	65	55	47	64	61	50	56	53	53	53	49	56	58	50
10.7	60	57	56	71	61	57	51	55	53	61	59	51	57	64	52	49	61	60	54	55	54	53	51	48	55	58	50
10.7	56	56	58	70	61	55	51	54	56	58	60	50	56	65	52	50	61	60	58	54	54	53	48	51	53	59	51
10.7	53	57	60	72	60	55	50	56	58	58	61	51	59	62	50	52	60	59	59	53	57	53	47	52	53	60	49
10.7	52	58	59	73	57	57	50	54	59	59	63	54	61	62	49	52	62	57	63	53	60	53	48	52	54	63	50
10.7	49	59	56	74	59	58	52	54	59	62	62	55	63	62	47	51	65	57	64	53	61	53	48	54	53	65	51
10.8	51	60	55	72	56	58	54	53	61	67	61	53	66	62	48	54	65	58	65	54	60	54	51	53	53	66	52
10.8	52	60	54	71	56	58	55	49	63	70	62	53	67	64	48	54	67	58	64	56	62	54	51	53	53	66	53
10.8	52	60	53	72	56	57	54	49	66	70	58	53	66	64	48	56	66	59	64	58	65	53	53	54	54	64	57
10.8	54	60	54	72	54	59	53	51	64	70	60	52	67	66	50	56	67	62	62	60	64	55	54	56	53	63	57
10.8	57	60	52	71	53	59	53	52	63	70	58	52	64	65	53	56	70	65	62	58	65	58	58	55	53	64	55
10.9	57	59	53	70	54	61	53	53	62	69	58	51	63	64	52	59	70	64	62	61	64	59	59	55	53	62	55
10.9	57	60	56	69	55	65	56	52	60	68	57	51	62	62	53	58	70	66	63	61	64	60	60	57	56	64	55
10.9	58	61	57	69	56	65	58	52	60	68	58	53	59	61	53	60	73	67	64	58	61	65	60	57	56	65	56
10.9	55	63	59	68	57	67	60	54	57	67	59	52	58	61	54	58	74	67	66	56	63	64	62	57	58	66	54
10.9	54	63	62	69	60	66	61	54	58	65	58	54	59	60	54	58	72	66	67	53	66	64	63	57	57	67	56
11	51	62	65	69	62	65	61	56	59	66	59	53	62	61	54	58	75	64	66	51	65	61	63	55	54	66	55
11	49	64	64	70	65	67	60	58	62	67	60	56	63	61	50	57	75	61	67	54	69	60	62	56	54	69	55
11	52	65	66	71	67	66	59	59	63	69	60	59	66	63	49	53	77	60	69	54	70	61	61	55	54	72	56
11	56	66	67	72	69	66	60	62	65	73	57	59	66	65	50	53	77	63	67	55	72	60	59	54	56	74	57
11	56	68	67	72	67	65	60	63	68	77	55	56	67	64	51	54	77	64	65	57	71	62	61	55	58	75	58
11.1	57	67	68	74	66	64	60	61	69	78	55	56	69	64	53	53	74	65	61	57	73	63	60	59	58	74	59
11.1	59	64	68	73	66	64	58	64	68	76	53	57	69	63	52	52	71	68	59	58	73	63	60	58	55	73	60
11.1	62	64	68	72	66	64	56	67	68	75	59	56	73	61	53	50	74	71	59	59	70	66	57	57	54	74	58
11.1	65	62	69	70	68	64	55	68	67	73	65	59	70	57	55	50	73	72	58	60	69	65	60	57	52	73	56
11.1	66	57	69	69	65	65	56	70	69	71	69	69	69	55	55	52	66	71	58	61	66	66	66	66	66	66	66
11.2	69	69	69	69	69	69	69	69	69	69	74	74	74	74	74	74	74	74	58	59	59	59	59	59	59	59	59
11.2	69	69	69	69	69	69	69	69	70	69	76	76	76	76	76	76	76	76	61	61	61	63	61	61	61	61	61
11.2	70	70	70	70	70	74	70	70	73	75	85	85	85	85	85	85	86	85	60	60	60	61	60	60	60	60	60
11.2	72	72	72	72	72	82	72	71	76	82	88	88	88	87	89	88	88	89	69	64	64	60	64	64	61	64	64
11.2	76	76	76	79	76	86	76	76	80	86	94	97	90	93	94	94	94	94	72	67	67	64	67	67	65	67	67
11.3	83	88	83	86	83	91	83	82	83	93	96	96	95	96	98	96	97	96	76	71	71	67	71	71	73	71	74
11.3	90	91	90	90	90	96	88	90	91	99	92	93	93	93	94	93	93	93	78	76	74	71	76	77	75	75	78
11.3	94	95	87	93	94	95	94	94	96	94	89	89	89	90	89	89	89	86	73	69	69	75	71	69	69	69	71
11.3	83	83	83	83	83	83	85	87	93	89	86	85	86	86	83	86	86	85	68	66	67	69	66	66	66	66	66
11.3	78	78	78	78	78	78	78	81	88	83	83	83	83	83	83	83	83	83	66	63	63	66	63	63	63	61	63
11.4	73	73	73	73	73	73	71	76	73	80	80	80	80	80	80	80	80	80	62	57	61	63	56	56	56	56	56
11.4	66	66	66	66	66	66	66	70	66	74	76	76	76	76	76	76	76	76	59	59	61	56	58	60	58	65	53
11.4	59	59	57	63	57	64	58	62	57	69	74	74	74	74	74	74	74	74	60	56	63	54	60	60	56	65	52
11.4	56	58	58	62	55	62	59	54	57	66	70	70	70	70	70	70	70	70	61	54	63	54	57	58	55	64	51
11.4	56	60	56	64	55	62	58	53	59	66	69	69	69	69	53	56	67	63	62	54	63	53	56	58	52	64	51
11.5	55	62	57	67	56	61	57	56	57	68	66	66	66	71	55	56	70	62	66	53	61	53	55	57	53	68	51
11.5	54	62	58	68	57	61	54	56	58	70	59	54	59	71	55	56	70	61	68	55	59	56	54	54	53	66	50
11.5	56	63	59	66	59	60	54	56	59	69	55	56	57	71	57	58	72	60	67	54	60	59	54	55	53	69	51
11.5	58	61	61	65	60	62	53	58	59	69	51	56	57	69	54	59	72	60	67	55	58	59	56	54	53	68	51
11.5	60	60	59	62	65	63	54	57	57	68	52	57	61	69	52	59	68	60	65	54	58	63	56	52	53	64	54
11.6	58	60	59	58	68	63	54	56	55	68	50	56	63	65	52	59	67	63	65	52	60	63	56	52	52	63	56
11.6	56	60	57	59	69	64	54	57	55	70	51	52	65	62	51	54	67	66	64	53	58	64	56	52	54	66	57
11.6	55	61	57	58	72	65	54	56	55	71	52	50	66	65	48	55	67	65	64	49	57	65	56	52	52	67	59
11.6	52	61	55	58	71	65	53	56	54	72	53	51	67	64	50	54	69	64	63	50	60	67	54	53	53	67	60
11.6	51	59	54	57	71	64	53	56	55	72	57	51	67	61	51	54	68	64	61	52	61	67	54	51	54	67	58
11.7	54	62	53	58	68	64	54	56	53	72	60	51	66	60	53	51	64	62	60	53	61	66	56	51	53	67	57
11.7	54	64	50	58	66	65	55	56	53	69	64	51	65	60	54	52	64	60	61	53	62	67	58	52	50	66	58
11.7	54	63	51	57	62	65	56	56	54	69	66	49	62	59	58	52	66	59	60	52	61	64	59	53	51	63	55
11.7	56	63	50	61	58	63	56	55	56	67	67	48	58	60	60	53	64	59	59	54	62	61	59	52	50	63	52
11.7	58	61	53	65	57	61	56	56	54	70	67	47	52	61	59	53	65	59	59	54	63	59	60	51	50	62	49
11.8	59	60	55	66	56	60	54	55	56	69	65	49	50	62	58	55	62	59	60	53	63	59	61	53	48	60	46
11.8	60	57	59	67	54	59	52	54	54	68	65	50	48	61	57	56	61	58	55	53	62	58	61	52	48	60	45
11.8	64	55	60	68	52	57	52	53	55	68	64	51	50	61	53	58	59	59	57	53	61	56	60	51	49	58	42
11.8	63	56	60	65	53	57	54	53	55	68	62	51	53	63	52	59	54	61	56	51	61	54	58	52	50	58	44
11.8	60	56	63	64	55	55	57	53	57	68	58	52	51	61	53	58	56	64	58	52	59	54	56	55	53	63	44
11.9	59	56	64	67	59	55	57	55	61	68	59	51	54	61	52	58	56	63	59	55	54	55	56	56	54	63	44
11.9	60	59	63	68	63	54	56	55	64	67	57	54	54	63	52	59	58	65	57	52	53	57	55	57	56	63	47
11.9	59	59	63	68	63	54	58	57	66	65	55	57	55	60	56	58	61	66	57	55	54	57	55	58	56	61	48
11.9	58	59	64	68	63	53	58	58	66	65	53	59	58	60	56	57	63	66	53	57	53	57	57	58	57	61	49
11.9	59	62	63	66	65	53	56	58	66	64	52	57	57	61	57	56	65	62	54	56	53	57	57	59	55	59	52
12	57	63	62	66	65	54	56	57	63	63	56	58	59	62	58	56	68	58	55	56	55	57	59	60	55	59	54
12	59	61	63	66	63	53	54	55	64	65	58	57	61	63	59	54	67	57	53	56	58	57	61	59	56	60	54
12	59	59	64	66	62	52	52	54	62	65	58	56	60	65	58	54	64	58	52	57	61	56	61	58	53	58	55
12	58	57	65	67	61	53	50	53	61	66	60	54	59	66	59	55	64	54	52	53	63	56	62	57	52	58	55
12	58	58	66	63	59	57	49	51	58	66	62	53	61	65	59	55	62	52	53	48	64	58	62	56	52	58	58
12.1	58	53	67	63	58	61	48	51	56	70	66	53	61	65	56	55	60	53	53	50	64	56	61	54	52	60	57
12.1	57	55	64	64	56	63	50	51	56	70	66	51	61	64	52	56	60	56	56	51	65	56	60	53	54	62	56
12.1	56	58	61	63	58	68	50	51	57	71	66	49	59	63	52	56	59	59	55	53	65	57	59	53	55	66	59
12.1	56	57	62	64	61	68	53	54	56	70	64	50	59	63	52	58	60	62	55	57	65	56	59	53	55	67	57
12.1	57	58	61	67	64	70	52	54	55	68	64	50	58	64	54	60	58	65	55	58	59	56	58	53	56	65	58
12.2	58	61	60	69	63	69	52	55	55	66	58	54	55	61	53	63	61	68	52	58	60	57	57	51	57	64	57
12.2	58	62	59	68	64	69	54	55	51	66	56	56	54	59	56	64	61	67	54	58	61	56	56	51	54	61	57
12.2	58	62	58	67	63	66	54	56	52	64	54	59	54	61	57	63	61	65	53	58	61	56	56	50	57	60	56
12.2	58	62	57	67	64	63	57	58	53	63	55	59	52	61	59	64	60	64	54	61	61	57	56	49	58	57	55
12.2	58	62	58	65	63	60	60	59	51	62	58	60	54	62	61	62	59	61	53	61	64	59	57	49	59	58	56
12.3	61	64	60	63	61	59	61	59	55	63	58	61	56	63	59	61	56	60	51	62	65	60	57	48	57	57	55
12.3	59	63	63	59	60	59	62	60	56	62	56	60	58	63	59	61	57	58	53	59	63	61	57	48	55	55	55
12.3	59	63	64	56	58	60	63	59	56	62	57	58	59	61	58	60	59	54	56	54	62	62	57	49	57	56	55
12.3	57	60	64	52	57	61	63	57	54	64	59	57	60	62	55	56	58	53	58	52	60	65	57	50	56	56	54
12.3	57	59	61	53	56	61	61	58	55	66	59	57	64	64	53	54	58	54	58	56	60	63	56	52	57	57	51
12.4	53	59	59	55	57	59	60	57	55	66	59	57	65	63	53	52	61	56	61	57	59	64	59	52	57	59	52
12.4	53	58	59	56	57	59	59	55	57	68	61	59	67	63	51	50	62	56	60	57	60	63	59	53	54	60	56
12.4	53	57	61	60	58	57	59	56	56	68	60	60	71	63	52	49	63	57	63	57	58	63	60	55	53	62	55
12.4	54	56	61	65	59	58	55	53	53	67	58	59	69	62	51	52	66	60	63	59	54	62	58	55	52	61	55
12.4	54	57	60	66	60	58	53	55	54	67	56	62	67	62	51	53	67	61	61	59	55	61	56	56	52	62	55
12.5	55	55	60	69	60	59	53	55	53	68	58	61	64	61	54	55	65	60	62	58	56	61	57	58	53	62	55
12.5	56	54	59	70	59	57	52	58	57	67	60	60	62	64	55	53	65	58	63	56	58	62	56	57	57	62	54
12.5	58	53	60	73	59	61	55	60	58	67	62	57	57	64	53	56	65	59	61	56	61	62	58	59	56	60	53
12.5	57	51	63	72	61	62	55	61	59	66	60	58	56	62	52	57	64	58	60	55	64	61	58	59	55	59	55
12.5	58	53	65	72	62	64	55	61	61	68	58	55	55	61	50	60	64	59	63	53	64	60	59	61	53	61	55
12.6	56	54	65	67	61	64	56	62	63	69	58	54	54	59	49	60	67	59	65	51	63	58	58	60	54	59	55
12.6	54	55	64	65	62	65	57	62	62	70	60	50	54	59	46	59	68	60	64	50	63	60	59	61	54	58	53
12.6	53	56	63	62	60	65	55	60	60	69	61	51	54	60	47	60	68	59	64	52	62	61	59	62	52	54	52
12.6	51	59	59	61	58	65	55	62	58	68	61	51	57	62	48	59	67	61	64	52	66	61	59	62	52	55	53
12.6	50	59	59	61	60	63	56	60	58	68	63	54	57	60	48	61	66	61	67	52	66	59	60	63	49	53	58
12.7	49	62	58	61	58	63	57	60	57	68	63	55	61	60	46	59	67	61	66	53	64	59	59	60	47	55	61
12.7	53	63	58	62	58	62	56	61	55	67	62	54	62	60	46	58	67	63	71	56	62	59	58	59	49	58	63
12.7	54	65	59	62	60	62	53	60	52	65	61	55	63	59	45	59	63	64	70	60	60	57	56	57	48	57	65
12.7	55	65	59	59	60	62	52	60	54	67	60	55	63	59	48	58	63	67	67	60	61	58	56	58	51	60	65
12.7	58	65	59	59	58	60	50	61	54	66	60	57	63	59	50	57	63	65	67	59	63	60	57	59	52	61	64
12.8	62	64	60	58	61	61	51	61	56	62	60	56	60	62	51	59	63	63	68	58	63	63	55	61	51	61	61
12.8	63	64	63	58	61	62	53	62	56	62	61	58	60	62	52	61	63	61	67	61	63	62	57	63	50	60	62
12.8	62	62	65	59	62	62	53	60	55	63	61	58	59	62	54	62	63	62	67	61	63	60	57	61	52	57	61
12.8	62	63	64	57	62	62	55	60	58	65	60	58	58	65	55	60	62	62	68	60	63	59	58	64	52	58	58
12.8	62	63	65	57	63	63	55	60	58	67	62	59	60	67	56	60	66	60	64	62	66	60	58	62	55	56	56
12.9	60	62	67	60	63	64	55	60	58	65	64	58	62	70	55	61	69	61	61	63	66	62	60	63	55	56	53
12.9	60	63	65	62	61	68	55	60	59	62	63	61	61	71	55	64	69	61	63	62	67	62	59	63	55	57	52
12.9	58	65	63	62	63	69	55	61	60	64	62	61	61	72	54	63	69	62	61	60	69	62	59	61	54	59	52
12.9	58	65	63	64	63	68	55	59	61	64	63	61	63	70	55	61	69	60	60	60	70	61	57	61	55	59	53
12.9	57	63	62	63	63	69	54	59	60	65	62	61	64	71	53	58	68	60	60	59	66	60	57	58	55	63	52
13	57	65	62	65	66	68	54	60	58	63	63	60	64	69	52	60	68	62	64	60	68	57	56	56	56	69	56
13	53	63	61	67	69	66	54	57	58	64	63	59	68	65	50	61	69	65	63	57	68	55	55	55	56	71	59
13	55	63	62	69	70	63	56	55	61	65	66	57	68	63	49	61	70	65	64	57	71	57	57	53	54	75	58
13	60	63	63	71	71	61	60	55	59	63	66	57	67	64	48	61	67	65	65	57	68	56	58	54	53	76	57
13	61	61	63	73	70	62	60	55	58	63	69	54	65	62	50	62	66	67	67	57	66	54	58	56	50	75	57
13.1	62	59	64	73	67	60	61	55	57	63	70	54	65	62	51	60	68	65	67	57	64	51	61	54	50	75	59
13.1	61	58	66	75	64	61	62	56	55	64	69	51	63	65	51	58	69	65	66	58	63	52	62	53	50	70	59
13.1	60	56	66	73	62	60	61	59	57	64	67	55	66	66	54	58	69	63	66	57	61	57	61	54	51	69	59
13.1	61	55	70	73	62	62	63	60	58	64	68	54	63	64	56	59	73	60	61	61	61	60	61	55	54	69	60
13.1	58	55	68	74	60	64	64	62	60	62	65	56	65	62	56	59	71	60	60	63	58	62	63	57	52	66	60
13.2	61	55	65	71	58	69	61	63	62	61	63	58	61	60	58	60	72	57	58	65	59	65	60	59	51	66	59
13.2	60	60	63	64	58	72	60	64	64	63	63	60	61	59	58	60	70	54	54	65	59	66	59	61	51	63	59
13.2	58	60	62	60	58	74	61	63	64	63	63	59	61	61	58	61	68	53	51	64	60	69	58	65	53	64	59
13.2	56	60	60	57	59	76	60	62	65	62	61	61	58	61	58	64	65	55	48	64	59	69	57	66	55	64	60
13.2	53	66	59	60	61	76	61	63	64	58	60	60	59	63	56	69	66	57	50	64	65	70	56	66	55	66	64
13.3	52	67	60	61	63	74	58	60	65	61	59	59	61	64	53	71	65	58	52	63	66	71	56	66	56	69	65
13.3	54	70	62	62	64	72	61	61	66	66	62	59	61	66	51	72	65	61	52	64	68	69	58	66	56	70	66
13.3	57	70	61	62	63	71	58	60	62	68	62	56	59	66	55	72	65	64	52	63	68	65	61	65	56	71	63
13.3	56	69	61	64	61	72	56	60	60	74	62	57	61	65	56	72	65	66	55	62	70	63	61	66	57	74	63
13.3	53	68	63	63	61	69	59	63	60	74	61	58	61	66	57	72	68	68	60	63	68	61	63	65	61	75	63
13.4	52	67	64	64	61	69	59	63	59	74	62	57	62	67	59	71	69	70	62	63	67	65	63	64	61	73	63
13.4	49	65	64	65	62	69	56	65	60	72	63	59	63	65	61	69	70	72	67	61	68	66	64	64	60	72	61
13.4	52	62	65	65	63	68	58	65	60	72	65	59	63	63	62	68	71	69	69	61	68	65	67	62	58	71	59
13.4	52	62	63	67	63	66	60	66	58	70	66	61	65	64	63	66	69	67	70	60	68	66	70	62	54	67	56
13.4	54	61	59	67	62	67	61	67	58	69	69	60	63	66	61	66	71	67	71	62	68	67	68	62	55	65	54
13.5	54	59	60	65	62	66	66	67	58	65	71	61	65	70	59	66	68	68	72	61	70	67	68	61	54	63	52
13.5	54	55	59	68	60	69	67	62	57	63	70	60	64	71	57	65	69	70	71	60	71	67	67	59	54	60	53
13.5	56	55	60	69	57	69	67	63	58	62	70	59	65	72	58	64	67	69	71	61	70	65	67	58	52	60	54
13.5	58	57	62	70	57	71	68	66	59	62	69	57	67	76	57	63	69	73	73	63	71	66	65	59	52	59	58
13.5	60	56	66	69	56	71	68	65	61	65	67	57	68	78	54	63	68	75	73	63	69	63	61	57	53	60	57
13.6	62	59	68	71	55	73	72	66	62	69	67	57	66	76	55	62	67	76	71	64	66	59	59	55	55	60	57
13.6	64	60	69	71	53	72	70	65	64	71	66	55	67	73	60	61	66	75	72	65	66	59	58	55	55	60	57
13.6	62	63	69	71	54	75	72	64	65	75	66	58	68	71	60	63	64	75	71	63	65	57	55	57	57	65	58
13.6	61	64	69	72	55	72	72	66	67	74	67	57	66	68	63	61	67	77	69	65	64	56	55	58	56	66	59
13.6	61	66	70	73	58	74	69	62	64	74	68	58	65	67	63	60	67	73	67	62	64	57	53	60	56	66	59
13.7	58	68	71	73	59	75	65	61	66	73	68	61	66	66	61	62	65	70	67	59	64	58	53	58	55	69	57
13.7	58	69	70	72	63	74	63	60	63	73	68	63	67	61	63	63	67	65	64	57	65	60	56	58	56	73	55
13.7	59	72	69	71	66	71	66	60	62	74	68	64	67	61	65	62	67	63	61	56	66	63	60	60	57	72	53
13.7	60	72	66	69	67	69	65	59	60	74	69	65	69	62	67	63	68	64	58	57	64	63	62	61	59	74	54
13.7	63	70	68	66	67	67	64	57	57	71	70	66	69	61	66	64	69	63	56	57	65	64	64	59	56	75	56
13.8	63	69	65	67	66	68	61	58	56	71	68	61	67	61	65	65	72	61	54	58	66	64	67	60	58	75	58
13.8	65	68	67	65	66	69	62	63	59	72	71	59	69	63	66	64	72	60	56	61	65	65	71	62	58	79	58
13.8	66	67	69	65	64	69	62	66	60	72	72	59	70	66	63	63	73	63	60	62	67	68	70	63	61	76	60
13.8	65	66	71	68	62	67	64	66	63	71	71	61	68	68	59	60	70	63	61	64	69	67	68	60	63	74	59
13.8	68	68	70	70	62	66	65	66	63	72	71	64	67	69	59	61	70	62	63	62	70	66	70	57	65	76	62
13.9	66	66	70	70	63	67	65	67	65	70	73	66	65	71	60	60	71	66	66	63	70	67	68	57	63	75	64
13.9	64	67	69	68	64	69	68	66	67	70	75	68	63	73	59	61	74	67	67	58	71	65	66	56	63	75	65
13.9	64	66	69	67	65	68	69	64	66	72	74	68	62	74	56	60	76	68	69	60	70	66	65	59	63	75	66
13.9	59	66	69	66	66	70	70	62	64	73	75	69	61	74	55	63	75	66	70	60	70	67	63	61	64	75	67
13.9	57	70	69	66	66	69	66	60	65	73	74	66	61	74	55	64	76	68	74	59	68	66	64	62	62	74	67
14	57	70	68	66	71	68	63	60	64	74	74	68	63	69	59	63	77	67	74	59	68	66	66	62	62	74	67
14	58	72	69	67	71	67	64	59	63	77	74	69	65	69	60	61	74	69	72	60	67	66	68	62	60	74	65
14	59	72	68	64	72	68	62	57	62	77	69	69	66	68	62	60	72	73	70	61	65	66	68	64	61	74	66
14	62	74	69	66	75	68	61	58	61	77	68	66	67	69	61	61	70	72	68	63	65	68	69	65	61	75	65
14	62	71	71	69	74	69	61	59	63	78	65	62	65	71	60	61	69	71	68	65	66	71	68	66	63	76	66
14.1	62	71	72	72	74	69	61	59	65	77	65	63	66	72	60	62	67	71	70	66	68	70	68	68	63	78	64
14.1	60	71	74	73	71	70	59	59	61	76	65	66	67	72	56	63	67	71	69	67	71	69	65	69	63	77	65
14.1	62	69	72	77	71	70	60	59	64	74	66	67	66	73	57	61	65	71	66	70	72	69	66	68	63	77	67
14.1	64	69	73	77	72	72	60	59	64	71	66	70	66	75	58	64	66	70	67	69	70	67	65	68	64	79	67
14.1	62	67	72	74	72	76	61	61	64	68	69	71	63	73	58	63	67	72	69	70	70	65	63	68	64	76	67
14.2	61	69	70	69	71	75	64	62	67	68	69	71	64	73	60	66	67	71	69	71	71	64	62	66	64	73	66
14.2	61	71	68	67	69	73	64	61	67	69	68	69	64	71	59	69	69	71	71	75	74	64	63	68	63	72	63
14.2	61	71	65	71	68	73	63	62	65	67	70	67	66	70	62	70	72	70	72	77	74	62	64	66	61	72	63
14.2	64	71	65	72	69	68	61	64	69	68	69	63	66	68	65	69	74	72	75	76	77	60	64	65	60	70	62
14.2	66	70	65	71	69	68	60	66	70	68	72	65	70	64	65	69	72	72	75	77	77	60	65	62	60	69	61
14.3	66	71	66	72	65	66	60	65	70	68	70	66	72	64	66	68	73	73	75	76	78	61	65	61	59	71	60
14.3	67	71	68	71	66	65	61	66	69	72	67	66	71	64	69	70	73	73	76	74	79	65	66	61	61	70	60
14.3	70	72	69	73	67	61	64	65	67	74	69	64	71	67	69	68	73	73	75	73	78	65	66	60	62	69	59
14.3	72	70	71	72	65	62	65	63	66	74	69	63	70	68	66	70	75	68	75	71	76	66	64	61	61	69	62
14.3	70	72	70	73	66	64	65	64	61	75	71	63	71	70	64	70	77	69	73	70	76	65	62	62	62	70	63
14.4	69	71	71	74	64	67	65	63	59	77	73	64	74	71	62	67	78	69	71	70	75	66	60	64	59	71	64
14.4	70	71	68	76	63	67	66	63	58	76	72	65	72	77	64	66	76	68	70	69	76	67	61	65	59	70	65
14.4	67	73	68	75	64	70	66	64	57	74	73	65	71	77	64	68	73	67	70	67	74	67	60	65	57	71	64
14.4	65	73	65	71	66	71	66	68	58	76	72	68	71	76	64	66	72	67	69	65	76	68	60	64	58	66	62
14.4	62	75	65	70	66	70	66	69	60	78	72	67	71	78	64	67	72	63	69	66	77	68	60	66	58	66	59
14.5	62	76	65	70	67	70	66	70	64	78	70	68	72	77	65	67	71	64	73	64	81	64	60	65	59	65	54
14.5	61	74	63	72	67	73	67	70	66	80	70	68	74	76	67	68	74	66	71	65	83	65	62	65	60	70	55
14.5	61	73	65	72	67	72	67	72	70	81	70	67	74	75	67	68	75	69	72	66	84	66	61	66	63	73	56
14.5	62	71	65	69	66	74	66	73	73	79	71	68	75	71	64	69	75	69	73	68	82	68	65	63	62	74	56
14.5	62	72	69	69	66	74	65	71	74	79	70	68	75	72	66	69	76	67	73	69	84	68	65	65	62	76	57
14.6	65	69	72	70	69	74	63	71	74	82	72	69	73	71	67	69	78	68	71	71	83	69	67	64	63	77	59
14.6	70	72	72	71	70	71	64	69	74	83	73	68	71	72	65	69	80	69	70	72	78	68	66	64	62	79	62
14.6	75	72	75	70	71	74	62	68	72	83	75	67	69	70	64	71	81	68	71	74	77	66	64	65	60	78	66
14.6	76	75	74	73	71	78	62	69	70	81	77	68	68	71	62	69	84	72	71	74	76	66	63	62	62	80	69
14.6	77	76	73	75	67	76	62	68	71	80	78	68	64	73	63	67	83	72	72	75	75	67	65	63	61	80	70
14.7	79	78	74	76	68	74	61	69	70	78	77	69	64	74	65	68	80	73	73	72	75	66	66	64	61	77	69
14.7	76	80	74	79	70	72	63	70	70	74	75	68	65	72	65	68	78	71	74	71	74	67	65	62	62	78	68
14.7	74	76	70	79	70	70	64	71	72	74	74	71	67	73	64	66	78	71	76	71	74	68	65	65	65	72	66
14.7	73	75	72	80	69	69	65	72	72	72	74	70	67	72	61	68	78	70	77	71	74	68	66	69	66	75	64
14.7	75	74	72	79	72	68	69	73	72	71	75	69	70	71	63	68	76	74	78	72	74	67	67	66	68	73	63
14.8	74	71	72	80	71	68	68	72	71	72	75	70	72	71	62	68	78	76	75	74	74	70	68	65	69	77	62
14.8	73	72	72	80	71	70	72	72	71	71	74	69	74	71	62	69	79	79	74	77	73	69	70	66	73	76	62
14.8	73	70	72	78	69	71	74	71	72	71	73	69	73	72	60	69	79	78	74	78	74	69	73	66	72	76	62
14.8	73	73	73	78	70	72	73	69	70	74	74	70	74	78	61	71	76	78	74	81	74	68	75	70	73	75	61
14.8	75	74	74	81	70	72	70	69	70	76	71	72	74	78	61	74	78	81	72	82	72	69	76	68	73	77	62
14.9	76	76	75	79	71	72	71	67	70	77	73	74	71	79	61	74	77	82	72	80	71	69	77	67	73	78	62
14.9	77	78	75	78	71	73	70	68	70	76	75	74	70	77	62	74	78	79	73	79	74	69	78	67	75	76	64
14.9	78	83	75	77	71	75	69	67	71	78	76	76	71	79	62	75	81	77	74	75	74	70	81	66	76	77	64
14.9	76	84	73	77	70	75	70	67	71	80	79	75	74	80	65	76	79	74	74	73	76	71	83	68	74	76	63
14.9	73	86	74	76	72	76	69	68	73	80	80	73	75	78	67	74	80	73	79	69	76	74	83	69	72	76	64
15	72	87	71	77	71	77	69	68	72	77	77	74	76	77	68	77	81	72	80	68	77	74	83	71	73	77	64
15	72	87	66	74	72	78	68	68	73	78	79	72	79	76	68	79	81	73	82	65	76	75	82	71	75	78	67
15	73	87	68	71	71	80	67	69	72	78	80	71	77	77	70	79	82	69	81	64	77	76	80	70	71	79	68
15	74	86	68	70	72	79	67	69	72	79	81	70	78	76	74	77	80	69	79	63	77	79	77	68	74	78	71
15	74	86	68	69	74	80	65	70	73	79	80	70	80	75	74	78	82	68	76	65	77	79	73	70	73	77	71
15.1	74	85	66	68	75	83	65	67	72	81	79	69	80	77	76	80	82	70	72	71	75	78	69	73	73	78	74
15.1	73	79	65	68	73	82	65	65	70	80	78	70	78	77	74	83	82	71	71	74	73	78	69	75	70	79	74
15.1	73	78	66	69	74	80	62	65	70	80	76	72	76	81	75	84	80	73	69	76	71	78	68	74	70	81	71
15.1	73	75	67	70	75	80	60	67	72	78	73	74	76	82	73	84	81	76	67	80	73	77	67	72	70	82	73
15.1	73	72	69	71	74	78	61	68	74	79	77	75	75	81	70	81	78	76	67	79	75	76	67	74	71	83	72
15.2	72	73	70	76	75	76	61	67	75	82	76	79	79	78	67	79	80	75	67	80	77	77	68	74	73	84	72
15.2	71	71	72	82	76	75	62	69	74	85	80	80	80	80	67	79	78	77	70	83	74	77	71	72	71	83	68
15.2	69	70	73	88	75	75	66	72	73	85	82	76	80	78	69	78	79	77	75	83	75	78	72	74	71	84	66
15.2	69	71	74	88	73	74	69	74	75	86	81	76	78	79	69	77	82	81	81	84	73	77	74	75	72	82	69
15.2	69	75	75	89	74	74	73	75	74	86	81	76	78	79	68	81	82	81	83	82	75	77	78	75	72	79	70
15.3	71	77	75	89	74	76	75	75	77	86	84	75	77	81	67	79	83	79	85	78	74	79	78	72	76	80	73
15.3	72	79	78	88	71	80	76	74	77	84	83	75	75	81	70	78	84	79	84	77	78	82	78	73	74	79	71
15.3	74	80	81	87	75	84	76	76	79	82	84	75	76	79	71	80	84	78	85	76	80	85	78	75	77	76	75
15.3	75	81	80	87	78	84	75	76	76	80	84	75	76	78	71	81	84	77	83	77	80	82	76	78	75	76	76
15.3	75	81	79	84	75	86	75	71	76	79	83	72	74	80	72	83	82	76	81	77	79	81	75	78	74	74	77
15.4	74	81	80	79	72	87	74	71	76	76	82	72	73	77	75	84	82	75	79	74	81	78	77	79	72	75	81
15.4	76	81	77	73	74	89	71	70	78	74	81	73	72	78	77	82	83	76	74	72	83	75	77	78	68	79	80
15.4	76	79	77	72	76	91	67	71	76	73	78	73	71	76	76	81	83	77	74	73	86	74	80	77	68	80	84
15.4	75	80	78	73	76	89	68	73	76	74	80	72	73	74	76	77	82	77	73	72	86	75	81	76	69	83	82
15.4	73	79	79	71	79	85	70	71	74	75	78	72	72	74	77	73	83	78	72	75	83	79	81	76	71	86	81
15.5	74	76	78	72	81	83	69	74	72	75	81	69	71	74	78	72	84	82	76	75	81	79	82	75	71	90	81
15.5	74	75	78	74	83	80	72	74	70	81	80	68	69	76	78	71	88	81	79	75	81	78	80	76	73	89	80
15.5	75	78	77	73	82	76	73	73	67	85	80	69	72	84	77	71	88	84	81	77	82	78	78	76	73	87	81
15.5	75	79	78	75	84	74	76	71	67	88	84	70	75	82	76	71	87	85	82	77	86	77	77	76	72	84	79
15.5	77	78	78	79	83	75	75	70	67	88	86	70	75	84	77	70	87	88	82	76	87	79	75	75	74	88	77
15.6	79	79	80	84	80	74	75	69	66	89	88	68	74	86	77	75	85	89	82	74	89	79	75	77	73	86	75
15.6	77	77	82	86	82	73	75	71	66	90	88	68	76	86	75	78	85	90	84	71	89	79	73	79	74	80	75
15.6	79	79	81	89	79	72	75	72	67	89	90	71	78	88	73	79	83	91	82	70	88	78	69	81	74	82	74
15.6	83	81	82	89	76	76	75	70	70	90	91	69	80	91	75	83	83	92	80	73	90	75	69	79	73	81	72
15.6	83	79	81	88	77	79	75	72	71	92	92	71	81	87	80	84	80	89	81	73	92	78	69	81	71	84	73
15.7	83	79	79	88	80	82	74	74	70	92	93	73	82	86	81	88	82	89	78	76	92	78	69	83	68	86	72
15.7	82	79	81	90	83	85	72	79	72	90	93	75	80	82	83	91	81	87	77	81	90	82	71	84	70	88	72
15.7	82	79	85	90	84	87	77	83	74	86	90	76	82	79	84	91	84	85	79	82	88	84	70	85	73	90	70
15.7	80	80	86	87	86	88	79	84	76	88	88	76	81	78	83	90	87	83	81	83	84	87	69	84	74	92	74
15.7	80	79	83	87	87	88	78	86	78	87	89	78	85	77	81	89	91	82	82	83	85	85	71	82	73	95	76
15.8	79	80	85	84	87	87	81	87	77	91	85	80	83	75	80	85	94	82	82	86	87	84	71	82	71	93	77
15.8	80	81	85	84	84	86	84	85	75	92	81	81	88	75	79	85	93	83	86	86	89	82	70	80	69	95	78
15.8	80	80	85	82	86	87	84	84	77	94	79	84	91	75	82	83	93	82	84	86	88	79	72	77	70	95	81
15.8	79	80	87	83	84	84	83	84	80	94	77	82	90	82	81	81	94	84	85	85	88	78	76	73	71	97	82
15.8	79	80	84	81	83	85	81	82	81	91	74	83	91	87	76	84	96	87	89	87	85	79	79	75	73	97	81
15.9	78	79	84	80	84	86	81	83	83	89	72	84	90	91	72	83	97	90	89	87	86	77	82	75	77	93	78
15.9	84	82	84	83	84	88	78	82	84	94	75	83	92	95	71	80	99	94	89	88	86	79	87	74	80	96	78
15.9	85	83	83	85	85	90	78	78	83	99	78	77	92	101	72	83	99	94	90	91	88	80	91	75	83	96	76
15.9	86	84	82	85	85	92	78	78	81	103	79	79	91	102	71	83	97	91	92	89	89	82	95	78	83	96	74
15.9	88	88	81	85	83	93	77	81	81	99	84	81	91	102	68	87	100	92	89	91	88	83	97	81	84	95	73
16	88	87	84	87	84	96	76	85	84	97	88	83	90	104	70	90	101	91	91	92	85	85	100	83	85	97	74
16	90	86	86	90	84	99	77	85	85	94	89	80	89	106	68	89	101	87	94	87	87	83	98	85	83	94	74
16	90	88	84	91	86	99	76	83	85	94	94	77	92	104	68	88	100	84	97	85	90	86	97	86	81	95	75
16	90	87	82	95	83	98	76	82	88	93	98	76	95	101	68	86	98	84	96	81	92	85	94	87	78	94	77
16	92	90	85	95	81	99	78	84	85	95	95	77	93	99	72	84	98	89	96	78	99	87	90	87	74	95	78
16.1	96	89	87	99	80	98	82	85	85	95	98	77	93	96	76	85	99	87	100	77	97	87	87	88	71	96	83
16.1	98	91	90	100	83	100	82	85	87	100	105	78	94	97	79	85	100	90	98	77	98	90	84	91	73	98	87
16.1	97	95	93	100	85	98	84	87	87	102	109	78	93	99	79	87	99	93	103	79	99	92	83	94	73	100	91
16.1	98	96	96	103	88	104	86	88	91	102	110	77	94	98	79	89	102	98	104	84	100	95	81	96	75	100	92
16.1	97	101	102	107	91	108	89	91	92	108	110	78	93	99	81	91	109	101	104	87	103	97	81	99	79	98	91
16.2	98	106	104	112	99	114	92	91	91	116	114	79	97	100	85	93	113	107	106	91	104	98	84	101	86	102	95
16.2	98	114	106	117	107	116	97	91	96	123	117	80	101	105	88	98	116	108	110	98	108	99	88	105	93	107	96
16.2	104	118	109	119	113	122	104	96	96	129	119	89	103	110	90	102	121	113	110	98	113	103	91	106	96	119	96
16.2	108	122	112	123	117	128	113	100	101	138	124	92	110	115	90	109	126	116	113	106	117	110	95	107	100	129	99
16.2	111	125	118	127	124	136	116	107	105	147	126	96	115	123	96	116	133	118	115	110	124	116	98	105	101	142	102
16.3	113	128	120	131	130	142	120	108	111	154	126	102	121	127	97	121	138	121	124	116	136	119	104	105	100	149	101
16.3	119	135	128	138	131	144	122	110	114	160	129	109	129	131	103	128	146	128	126	120	147	126	113	107	102	158	104
16.3	129	140	138	144	139	147	127	113	118	164	131	117	136	139	105	134	157	137	131	125	156	130	114	108	103	161	108
16.3	139	145	146	145	144	149	131	119	123	169	131	121	139	144	110	139	164	146	134	128	164	137	119	112	105	165	110
16.3	149	149	154	150	147	150	140	121	127	168	138	128	142	145	113	143	167	153	142	134	167	142	123	117	106	165	116
16.4	154	154	162	151	150	151	141	125	132	167	142	133	146	149	118	147	167	157	147	135	169	150	128	123	108	162	120
16.4	156	157	163	148	153	148	143	133	141	159	141	137	150	149	124	149	160	160	148	138	169	157	135	131	110	154	126
16.4	157	151	163	148	152	147	146	135	149	150	140	136	152	143	129	148	156	158	147	138	164	156	137	134	114	144	130
16.4	154	148	158	144	150	140	147	138	151	141	140	134	150	142	140	145	151	159	146	138	155	155	138	141	123	133	131
16.4	153	144	151	141	151	135	148	140	155	131	144	132	150	135	145	139	137	158	144	137	148	153	143	146	131	126	138
16.5	148	140	140	134	147	127	149	140	158	123	141	131	142	130	151	133	125	150	138	134	142	150	141	149	136	118	141
16.5	148	130	130	130	143	119	152	140	153	117	136	129	137	122	153	130	115	142	128	127	131	148	138	146	140	116	140
16.5	140	121	118	121	135	113	148	136	149	112	131	125	132	113	153	126	108	130	124	126	124	143	136	141	139	112	137
16.5	129	114	111	114	127	107	138	132	142	105	126	121	125	108	152	122	102	120	116	120	118	134	128	135	134	110	133
16.5	117	107	103	110	118	99	129	119	135	101	118	116	118	105	144	115	99	112	113	117	113	127	127	129	128	106	128
16.6	113	106	103	107	111	94	120	109	122	98	112	112	114	102	137	109	100	105	104	110	108	121	120	124	125	105	124
16.6	108	102	98	101	112	91	111	101	112	92	106	107	111	103	123	104	103	95	101	109	104	112	111	116	120	103	117
16.6	99	98	96	98	105	89	103	93	107	93	100	103	106	102	112	97	99	91	98	103	98	106	105	105	111	101	108
16.6	95	99	97	98	99	90	98	85	99	90	96	100	103	101	104	96	97	87	97	102	98	101	98	97	103	98	100
16.6	91	98	96	97	94	91	91	83	93	89	91	96	103	100	97	93	96	82	95	99	96	101	94	92	94	95	95
16.7	90	95	95	95	94	93	88	82	92	87	90	92	99	98	90	92	97	81	92	97	97	100	90	91	89	93	93
16.7	89	90	95	96	89	91	86	78	89	89	89	89	96	96	85	90	97	81	91	95	93	95	85	87	84	95	92
16.7	89	87	93	99	85	91	85	81	90	90	87	83	94	94	86	89	98	87	91	95	90	95	83	88	80	95	88
16.7	88	88	92	99	83	94	85	83	91	91	88	84	94	90	84	90	96	90	92	95	92	96	82	88	78	97	90
16.7	87	85	89	99	83	93	85	82	90	91	87	85	90	85	88	90	96	94	89	92	91	92	81	89	76	96	90
16.8	89	86	88	98	84	93	86	82	92	94	85	84	91	82	88	91	98	95	90	91	89	90	80	88	77	96	90
16.8	88	85	85	96	82	94	83	84	91	93	87	83	88	78	88	90	100	98	92	90	89	89	78	88	79	99	90
16.8	87	88	86	97	80	93	81	85	93	95	89	82	87	81	89	89	96	100	92	87	87	89	77	91	80	101	89
16.8	86	89	82	96	82	92	82	87	90	97	89	81	84	82	86	85	94	98	95	86	89	87	80	92	83	102	85
16.8	91	93	84	93	86	93	84	86	89	96	90	82	87	86	84	82	95	96	94	85	86	86	82	94	84	101	84
16.9	91	93	81	95	89	93	83	88	88	95	91	82	85	91	81	80	92	92	92	86	85	83	83	92	86	100	83
16.9	91	93	87	97	86	93	81	87	89	94	92	82	84	93	82	80	85	92	92	84	85	83	82	88	86	99	82
16.9	92	93	88	97	88	96	81	89	89	93	92	79	85	94	84	83	82	91	90	83	89	83	80	90	88	96	81
16.9	93	94	90	98	90	93	79	89	86	94	91	81	84	99	83	85	83	88	90	82	93	83	80	89	88	96	82
16.9	96	94	93	98	93	94	77	91	85	94	91	82	82	100	83	87	88	90	91	81	96	84	82	91	88	96	83
17	94	91	93	97	92	93	78	95	84	93	89	81	82	101	83	88	89	92	90	80	98	83	82	89	87	96	83
17	90	86	92	97	92	91	79	96	85	92	90	82	86	99	88	92	92	94	91	79	102	83	83	86	86	95	81
17	88	86	93	96	92	89	78	92	88	92	93	81	90	94	90	94	97	98	90	83	101	85	84	85	86	92	83
17	86	83	94	92	90	87	79	87	88	93	92	82	91	89	93	92	102	99	91	79	101	84	85	85	84	91	82
17	86	84	95	89	89	90	81	87	91	93	91	83	90	87	91	92	105	98	93	83	103	87	83	83	84	91	86
17.1	86	82	93	88	86	89	82	85	92	91	91	83	89	84	89	91	110	99	94	84	103	90	83	82	85	93	85
17.1	88	84	90	86	85	89	85	85	94	95	92	83	89	83	87	91	111	97	97	86	102	91	87	83	84	94	82
17.1	88	83	88	85	89	91	89	85	92	99	93	85	85	82	83	90	113	92	98	89	100	90	89	81	84	94	79
17.1	93	85	89	88	89	94	90	82	92	98	94	82	85	83	80	89	114	91	96	88	98	92	88	81	82	95	80
17.1	92	87	89	91	89	96	91	81	90	102	95	81	85	85	78	89	111	92	96	89	99	89	89	81	83	96	80
17.2	90	86	92	91	87	99	90	79	89	101	92	81	85	86	77	90	110	91	93	89	98	90	90	82	80	99	84
17.2	90	87	90	94	89	100	88	77	90	103	92	80	86	89	74	90	103	88	92	88	98	88	89	84	79	103	86
17.2	89	87	91	98	91	98	84	74	87	105	90	83	85	95	74	91	100	85	93	85	97	85	92	86	77	106	87
17.2	88	88	92	100	92	102	84	79	86	107	91	83	85	96	73	89	98	88	91	83	95	82	94	86	76	106	87
17.2	85	89	92	100	91	101	87	83	87	106	92	79	85	99	76	88	96	91	89	84	96	80	96	84	75	106	86
17.3	83	91	94	100	92	98	87	85	90	105	93	80	89	100	79	87	95	93	89	83	93	79	97	85	73	104	86
17.3	84	94	96	102	91	94	85	83	93	103	93	76	87	99	79	84	94	93	89	84	90	79	97	88	71	103	88
17.3	83	95	95	102	91	91	87	83	93	99	96	78	87	98	81	86	91	92	93	81	91	81	94	90	70	104	88
17.3	85	94	95	102	90	93	87	85	94	95	97	82	87	98	82	85	90	95	93	87	93	84	92	89	72	106	91
17.3	84	94	95	101	89	90	87	85	95	94	97	84	88	98	82	85	90	97	94	86	91	85	92	89	75	106	89
17.4	84	94	90	97	90	92	88	92	95	94	97	87	90	94	82	88	90	97	95	88	90	88	92	88	75	109	90
17.4	83	93	91	96	95	90	89	96	94	94	95	89	87	93	81	90	96	98	96	88	92	89	90	86	78	110	90
17.4	88	93	91	94	93	92	90	97	93	92	95	88	90	92	80	94	95	98	95	89	96	90	86	85	81	111	90
17.4	87	94	92	92	95	93	90	97	89	94	91	88	92	91	82	96	97	100	99	90	98	91	84	85	83	112	94
17.4	89	92	90	90	95	95	90	92	87	96	89	90	94	91	80	97	96	97	101	90	96	90	80	85	83	111	94
17.5	93	90	90	89	95	95	89	89	87	97	89	88	97	92	79	100	93	94	102	93	96	91	80	85	83	111	92
17.5	92	89	91	89	98	96	89	88	83	100	88	88	100	92	78	98	93	95	102	90	92	89	83	86	81	108	92
17.5	91	93	91	88	98	98	91	90	86	102	89	86	99	93	80	96	94	96	99	91	93	88	86	85	80	107	92
17.5	91	95	92	89	96	97	90	89	87	101	89	87	99	93	80	95	95	94	96	90	94	88	87	86	81	101	93
17.5	93	98	96	92	96	96	89	87	87	101	90	87	97	96	81	92	95	90	97	91	92	89	90	90	78	98	92
17.6	94	100	96	95	99	97	88	83	89	100	92	87	93	93	83	91	97	88	96	93	91	89	93	91	77	98	92
17.6	91	99	96	97	95	96	91	81	90	100	95	92	98	91	86	93	98	90	97	95	91	92	92	90	83	95	89
17.6	91	97	101	95	94	99	91	81	92	100	94	98	99	89	87	89	100	92	94	95	91	94	98	89	87	94	89
17.6	87	96	107	96	93	97	90	83	92	100	94	101	100	91	85	89	99	93	93	96	93	96	97	91	88	92	87
17.6	88	95	108	97	92	95	92	87	94	96	92	103	102	92	83	89	99	93	93	98	95	97	98	91	87	93	87
17.7	89	92	111	99	94	88	93	87	93	99	89	102	99	94	82	87	102	94	91	100	98	98	97	92	89	92	88
17.7	94	91	111	100	91	88	95	86	91	96	90	101	101	95	84	86	101	94	90	100	99	98	94	94	92	92	87
17.7	96	89	112	99	91	88	94	87	88	98	87	99	100	97	85	85	101	96	95	99	99	100	90	94	90	92	86
17.7	98	89	110	96	91	87	93	86	85	99	86	96	102	97	81	84	98	96	96	97	100	98	88	97	90	92	82
17.7	101	89	107	94	90	87	90	87	84	98	83	93	103	96	78	86	100	99	95	96	101	99	90	97	90	94	82
17.8	100	90	104	94	92	91	90	89	81	99	83	89	101	94	80	85	96	102	94	93	101	95	89	99	89	97	88
17.8	98	90	97	94	89	91	89	91	86	98	85	89	96	96	83	87	100	103	92	93	103	94	88	98	91	99	87
17.8	101	88	92	97	88	92	84	93	88	98	87	87	94	97	84	89	100	100	91	92	104	93	88	96	90	98	88
17.8	102	87	92	97	91	96	85	95	88	101	92	87	90	98	88	91	100	100	95	93	106	91	90	96	88	101	87
17.8	97	89	90	98	92	100	84	93	89	98	97	87	84	99	91	91	104	101	96	93	105	90	90	93	93	103	89
17.9	94	89	90	99	94	103	87	95	92	99	96	86	84	99	93	90	103	102	96	94	108	94	90	91	98	101	90
17.9	92	90	93	100	97	105	86	95	91	95	98	89	82	102	92	91	103	102	96	91	107	96	94	91	98	101	91
17.9	90	92	100	103	97	102	85	96	92	97	98	89	84	107	90	89	100	102	100	94	108	94	93	94	97	101	91
17.9	91	94	100	105	98	97	88	92	94	95	100	89	84	113	88	87	99	98	99	93	104	96	95	94	98	101	90
17.9	91	94	102	106	99	94	87	92	92	97	102	88	84	115	88	85	100	98	97	96	103	95	96	97	97	100	91
18	95	96	103	105	97	98	91	93	91	97	104	91	87	115	85	85	101	99	98	93	100	95	94	97	99	103	89
18	98	95	107	103	98	97	93	94	89	97	102	90	95	114	83	84	100	98	100	90	99	94	91	96	95	104	90
18	99	99	108	106	99	96	89	94	90	97	100	91	102	112	80	84	98	95	101	89	95	93	90	97	96	103	91
18	101	100	107	106	99	98	89	94	91	98	98	92	108	110	78	85	97	97	100	92	94	92	88	95	95	102	91
18	102	98	107	108	97	97	91	94	91	100	96	91	108	106	80	83	97	96	97	94	90	85	87	93	95	101	89
18.1	101	96	105	109	96	96	89	96	97	103	95	94	108	108	82	83	100	94	95	92	90	87	87	87	92	99	87
18.1	105	92	103	110	95	95	89	98	96	103	94	91	109	107	85	83	97	94	94	92	88	87	87	87	90	98	88
18.1	101	91	103	109	96	96	90	97	96	102	96	92	106	104	84	81	98	94	97	92	89	86	88	88	90	96	89
18.1	99	90	99	112	96	97	90	97	95	99	92	93	101	104	85	78	100	91	94	93	90	89	86	86	90	93	88
18.1	99	90	96	111	97	98	90	101	96	104	87	94	99	101	83	79	99	91	90	94	94	94	89	87	88	94	86
18.2	95	89	94	110	95	100	88	99	94	105	86	94	97	101	83	82	97	94	94	91	96	97	93	90	90	96	87
18.2	95	91	93	109	96	100	89	98	95	107	85	91	97	103	79	82	95	94	95	94	99	98	95	93	90	95	88
18.2	95	93	89	108	97	102	90	94	98	105	89	91	95	103	80	84	93	95	94	93	100	100	97	94	94	98	87
18.2	96	97	88	104	96	105	94	98	95	107	91	89	96	103	80	86	94	99	96	93	102	98	99	94	92	100	91
18.2	97	99	87	101	94	107	99	98	96	109	93	90	98	100	80	88	95	99	96	91	101	99	95	93	92	103	91
18.3	97	100	88	100	96	105	100	97	94	108	97	91	102	100	81	91	95	99	96	93	103	97	94	96	92	104	91
18.3	95	104	91	101	97	107	97	94	96	106	100	92	104	99	81	92	94	98	94	97	103	97	95	93	91	104	90
18.3	96	107	92	101	100	104	97	92	94	109	99	92	104	98	82	91	94	102	94	100	106	95	94	94	90	105	88
18.3	99	108	96	103	101	101	98	91	96	110	97	92	100	96	84	88	95	100	94	100	104	90	96	93	88	105	89
18.3	99	109	98	103	104	100	95	90	98	109	97	92	100	98	87	89	98	98	96	96	106	96	95	94	85	105	92
18.4	98	108	96	105	103	98	94	89	96	107	99	89	100	96	87	89	100	99	100	98	105	94	95	99	90	108	91
18.4	97	110	94	104	102	101	93	87	99	103	99	89	98	97	87	87	105	97	100	97	108	94	93	98	91	108	89
18.4	97	109	94	106	99	102	90	90	99	102	99	90	97	96	87	87	106	91	99	95	110	96	91	99	92	108	87
18.4	97	107	97	102	99	102	86	93	96	103	100	90	94	98	87	89	106	93	100	93	112	97	93	100	92	110	89
18.4	94	104	98	104	99	106	85	92	95	102	100	85	96	99	88	91	105	96	103	92	115	98	92	102	96	108	93
18.5	95	103	101	105	99	107	86	94	96	102	101	86	94	101	86	94	103	96	102	91	117	97	90	102	97	107	92
18.5	96	102	101	108	98	109	86	95	94	100	101	90	94	102	91	96	101	99	106	89	116	96	91	103	98	109	92
18.5	95	99	103	106	99	110	88	97	93	99	103	94	94	104	93	95	102	96	105	88	113	97	92	103	97	111	94
18.5	93	97	104	107	97	107	91	96	93	98	103	98	93	103	94	99	102	96	102	89	113	99	89	101	94	111	92
18.5	90	96	103	108	97	105	92	96	92	101	106	104	94	102	92	101	101	98	100	90	112	98	89	100	93	108	89
18.6	92	96	106	108	98	104	95	94	93	103	104	106	94	104	91	99	100	98	99	91	114	99	92	99	92	107	88
18.6	93	97	106	109	99	98	95	99	93	105	102	107	95	102	90	99	100	100	99	91	110	102	93	103	89	106	85
18.6	95	97	106	108	100	96	97	99	93	105	100	107	95	102	92	97	101	100	97	91	107	104	95	100	89	103	84
18.6	94	98	103	105	101	95	97	97	90	105	100	105	96	105	91	99	103	102	97	89	108	109	95	100	91	103	86
18.6	95	100	98	104	104	97	95	93	90	106	99	99	98	105	90	96	103	106	96	88	104	109	96	95	92	102	85
18.7	95	100	97	102	104	101	96	93	94	106	100	97	98	106	91	95	106	107	93	88	104	107	95	93	87	101	83
18.7	95	101	95	101	103	99	94	96	93	112	100	96	99	107	88	97	107	103	91	86	104	106	97	95	87	101	86
18.7	94	103	98	97	103	100	91	100	92	116	102	93	98	108	89	96	108	109	92	85	105	106	98	91	87	102	87
18.7	95	105	95	100	103	101	91	100	94	119	101	88	100	106	87	100	109	109	90	84	107	107	99	92	87	101	89
18.7	98	104	97	101	101	103	89	99	96	118	100	89	100	106	88	99	110	108	90	84	109	107	101	92	91	103	90
18.8	96	103	101	102	100	102	88	99	94	115	98	90	101	102	89	99	111	106	91	85	106	105	103	94	91	106	93
18.8	96	103	101	103	102	103	90	97	98	111	102	90	98	97	89	98	112	102	93	88	107	104	102	92	88	110	96
18.8	98	106	102	104	100	99	89	98	98	112	103	87	97	95	87	102	111	103	96	90	107	103	97	91	88	111	96
18.8	100	106	101	108	97	100	90	98	102	115	106	90	99	93	90	102	112	102	95	92	104	100	97	94	90	112	95
18.8	102	107	104	107	97	99	90	97	101	113	107	89	101	95	88	100	113	99	98	97	105	97	97	98	93	114	95
18.9	101	105	103	109	97	99	90	94	103	108	106	89	103	95	90	101	114	98	98	98	104	99	95	99	96	112	93
18.9	104	107	103	107	96	97	90	90	104	108	104	92	104	95	91	100	112	98	100	103	107	100	96	98	101	108	94
18.9	105	110	100	110	98	100	91	88	103	105	104	92	106	99	90	101	111	99	104	103	106	99	95	98	100	111	96
18.9	107	109	99	111	105	103	91	86	105	105	104	90	111	103	91	95	111	101	107	100	106	98	96	99	99	108	96
18.9	105	107	100	113	106	101	93	88	107	104	105	93	110	103	92	95	111	103	109	101	108	94	97	102	96	109	96
19	103	108	100	109	106	98	96	90	107	110	103	95	109	102	90	94	113	106	109	97	108	94	98	99	96	110	94
19	103	107	101	108	106	95	100	91	107	108	105	93	107	103	92	91	115	112	110	96	110	99	97	96	96	110	94
19	105	104	101	107	105	94	105	90	107	110	103	94	105	103	89	94	115	111	108	96	111	103	100	98	95	110	94
19	106	102	105	108	101	95	106	87	105	107	105	94	104	104	91	91	117	113	108	97	110	103	99	98	95	108	97
19	105	100	107	109	98	91	105	88	102	104	104	95	98	103	90	93	117	111	109	96	111	104	98	98	93	110	97
19.1	106	99	103	107	95	94	103	88	102	103	105	95	93	101	88	95	116	112	110	95	113	108	99	94	92	110	98
19.1	110	102	103	107	97	90	105	91	101	105	104	93	92	102	90	98	113	111	110	97	112	111	98	96	93	108	98
19.1	109	101	101	107	95	95	105	92	100	107	102	94	91	105	92	99	112	110	108	100	112	111	98	93	96	109	101
19.1	108	103	102	106	96	96	106	91	95	107	104	93	92	106	88	102	110	107	109	101	113	112	98	94	99	107	101
19.1	106	103	99	107	97	100	104	92	97	108	105	95	92	107	91	108	109	105	106	100	115	115	100	94	103	104	103
19.2	104	106	98	107	98	101	102	94	97	110	106	97	95	110	91	109	105	102	108	103	112	114	103	95	105	104	104
19.2	103	108	97	112	104	105	99	97	97	108	108	95	99	115	89	110	106	98	110	102	107	112	102	96	104	107	104
19.2	106	106	99	109	111	107	98	97	96	106	106	92	103	117	91	109	107	97	108	100	105	112	103	100	104	104	103
19.2	107	106	101	112	110	103	96	99	99	105	107	94	105	115	87	107	107	97	106	99	106	108	101	97	101	107	101
19.2	106	106	100	110	108	103	94	101	99	107	104	93	104	114	86	103	110	101	103	97	103	105	99	95	99	108	97
19.3	108	104	101	107	105	102	95	102	102	104	104	91	106	117	84	102	113	101	103	98	101	106	97	99	95	110	97
19.3	109	106	102	107	101	105	96	101	104	107	100	93	107	116	82	102	111	98	103	98	100	102	97	102	93	110	95
19.3	113	105	107	107	98	107	93	100	106	107	99	94	109	119	82	100	113	95	100	97	102	99	93	103	93	112	93
19.3	115	107	107	107	97	105	89	100	105	105	97	95	106	120	84	96	112	92	100	94	107	100	91	101	95	111	91
19.3	116	107	105	107	96	105	88	100	106	105	94	98	107	119	83	96	111	92	98	93	105	102	93	98	97	109	88
19.4	116	110	105	108	97	106	92	102	107	107	94	98	106	114	86	95	111	94	100	96	109	102	94	96	96	113	91
19.4	115	111	104	109	95	109	91	99	107	107	93	98	105	113	87	97	111	97	102	93	112	106	95	93	99	108	94
19.4	113	112	104	113	97	107	93	99	104	109	97	100	103	111	90	99	111	98	105	93	110	106	99	92	98	106	93
19.4	108	113	107	113	100	109	95	97	107	109	99	102	100	110	97	101	111	100	104	94	111	107	101	91	102	106	97
19.4	105	111	109	117	101	107	95	95	107	108	99	102	101	109	100	102	110	100	104	97	107	104	104	92	101	107	98
19.5	104	110	112	121	104	109	96	96	104	108	101	99	102	104	101	101	112	101	105	98	105	105	105	91	102	109	101
19.5	108	109	113	119	106	107	98	95	102	109	102	101	101	104	101	102	113	105	102	97	108	104	107	92	105	108	103
19.5	105	110	107	121	103	105	95	97	104	110	104	103	105	103	96	100	114	109	105	99	112	101	104	89	106	109	106
19.5	104	109	108	117	104	107	96	98	102	112	103	103	104	102	95	100	113	111	104	98	108	99	107	91	105	113	110
19.5	104	108	108	116	105	109	97	97	99	111	103	105	108	102	91	104	109	111	105	101	108	101	105	96	101	114	111
19.6	104	109	109	117	106	109	96	99	96	113	103	106	111	104	90	103	109	112	106	102	110	102	103	97	102	116	111
19.6	104	108	108	115	108	110	91	103	93	115	104	107	111	107	91	101	110	111	103	101	113	104	101	99	101	118	108
19.6	102	108	107	114	107	109	90	103	91	117	106	104	111	108	91	100	108	113	107	102	116	104	99	98	103	116	108
19.6	99	102	100	112	105	108	90	105	92	117	106	104	110	109	92	102	110	115	106	105	118	105	99	96	101	119	106
19.6	98	102	97	112	103	108	91	103	95	122	107	101	114	108	94	100	113	117	109	104	122	110	103	93	98	122	110
19.7	99	105	96	111	104	111	91	101	98	122	108	99	112	112	97	101	113	118	109	104	123	116	104	92	98	116	106
19.7	98	101	96	111	105	110	91	101	101	125	114	99	111	111	100	98	114	117	109	106	121	118	102	93	97	116	107
19.7	100	102	97	109	107	113	93	100	103	122	115	98	109	112	104	96	117	120	108	106	118	121	99	95	99	116	106
19.7	102	98	97	110	108	110	94	100	104	123	117	95	111	109	103	96	116	120	109	107	115	120	97	99	98	118	105
19.7	104	98	97	112	111	111	98	102	104	125	119	92	109	105	102	92	120	120	113	103	114	122	94	102	101	115	105
19.8	109	99	99	113	112	108	102	100	106	125	120	93	112	105	102	93	122	120	113	105	114	118	92	104	103	114	104
19.8	111	99	99	113	112	110	102	98	106	122	120	91	111	102	97	95	122	120	114	107	110	114	92	105	105	111	101
19.8	115	101	103	112	114	108	106	98	105	118	120	93	109	98	97	97	119	115	111	106	109	112	94	108	105	111	99
19.8	116	106	104	116	114	107	105	98	103	115	116	95	108	97	94	100	116	113	114	107	107	113	92	112	103	109	100
19.8	117	110	109	119	112	105	103	102	101	113	116	95	110	100	95	98	120	116	117	106	106	110	93	114	104	110	100
19.9	117	114	112	123	112	105	100	106	102	111	112	96	107	101	97	97	121	113	115	106	107	107	96	114	102	112	100
19.9	116	115	115	122	109	104	102	106	101	112	109	94	107	105	98	99	121	110	114	108	105	106	99	112	101	113	103
19.9	116	118	114	120	106	104	101	106	104	107	108	97	104	109	97	100	122	109	112	110	106	104	103	111	98	114	101
19.9	115	123	117	123	104	104	99	103	105	113	106	97	110	114	99	99	119	105	109	109	106	105	109	108	96	115	101
19.9	113	126	117	122	103	107	98	104	105	113	107	98	111	115	100	101	120	105	109	111	107	106	109	107	97	118	100
20	112	123	117	120	105	107	95	105	103	116	107	101	114	113	103	101	120	107	111	112	108	109	109	110	97	120	106
20	111	124	113	116	104	112	94	105	103	116	108	103	114	114	104	103	121	111	112	113	106	113	108	107	96	120	105
20	107	123	112	115	104	109	97	105	103	118	109	101	114	111	103	105	118	112	115	111	110	116	105	107	99	122	105
20	109	123	114	117	102	112	98	105	103	122	109	104	118	112	102	106	121	113	119	109	113	114	104	108	100	121	105
20	114	120	116	115	100	110	98	100	102	123	111	100	123	111	105	110	117	116	118	112	112	114	104	106	100	123	101
20.1	116	118	114	117	102	113	102	99	105	124	113	99	120	113	105	114	113	116	119	110	115	113	104	105	102	120	99
20.1	113	118	114	118	102	110	106	99	108	127	109	102	121	112	105	114	112	115	119	107	118	113	100	106	103	119	99
20.1	113	120	117	120	99	112	106	101	111	128	110	102	121	114	101	112	112	119	123	109	116	115	98	108	103	120	103
20.1	114	116	122	125	97	112	107	100	109	122	110	102	122	119	104	109	114	121	124	104	113	114	98	107	105	119	107
20.1	113	114	122	126	101	112	110	98	113	119	109	101	119	121	104	109	117	119	123	102	111	115	98	105	109	118	107
20.2	111	113	119	123	102	113	110	99	111	117	109	98	119	125	103	108	118	117	121	100	110	114	98	103	111	116	105
20.2	110	118	117	122	102	114	111	97	110	113	109	98	119	127	99	107	118	118	119	101	109	114	99	101	108	114	101
20.2	107	115	116	121	104	112	109	96	108	116	109	100	119	125	100	109	120	116	117	102	110	111	101	99	108	114	103
20.2	105	114	115	119	103	112	110	97	108	115	108	101	116	121	100	109	122	117	117	104	110	111	103	96	107	116	102
20.2	104	113	111	117	105	111	108	98	105	116	104	103	112	121	99	109	123	117	118	106	107	113	102	97	108	115	106
20.3	98	117	107	118	104	112	105	94	103	116	105	104	111	118	98	111	126	112	116	104	106	113	104	93	111	115	108
20.3	101	120	106	117	106	108	105	96	103	115	108	102	113	117	96	108	129	114	116	103	109	113	105	97	116	115	109
20.3	105	118	109	119	108	107	104	92	104	121	110	102	118	118	96	108	128	115	113	103	108	111	107	100	115	116	110
20.3	109	117	110	120	110	106	105	90	106	123	109	99	115	114	98	109	125	117	110	104	111	111	110	102	115	115	109
20.3	110	118	109	125	111	110	110	92	110	126	106	104	115	117	98	108	121	116	109	105	113	110	109	106	117	114	115
20.4	110	116	110	128	113	113	110	95	109	131	103	105	114	117	94	107	122	117	108	108	112	111	107	112	118	116	117
20.4	114	119	114	127	112	118	111	100	116	129	106	103	115	118	95	108	122	120	113	111	111	111	108	115	119	118	120
20.4	113	114	117	129	116	117	113	99	115	127	106	104	115	119	98	110	122	121	115	108	110	111	111	117	119	115	121
20.4	115	113	115	127	117	121	113	99	120	130	107	105	115	120	98	112	126	123	117	110	112	111	112	116	120	117	117
20.4	117	119	111	120	119	121	113	104	120	134	110	102	118	126	98	110	124	126	118	113	113	114	114	118	118	118	112
20.5	121	121	113	119	117	123	117	105	119	137	114	106	116	124	99	112	123	128	120	117	113	114	114	116	113	123	113
20.5	123	122	116	118	117	123	117	108	120	139	114	112	115	124	98	114	126	127	121	117	118	114	115	113	112	128	110
20.5	128	127	120	118	114	122	113	113	119	146	117	115	114	126	99	114	126	129	124	116	120	118	117	110	110	134	106
20.5	127	131	123	120	112	126	113	114	121	149	118	115	115	127	100	119	133	128	131	117	117	123	116	110	110	137	107
20.5	125	138	127	122	113	128	113	114	121	151	126	116	119	128	100	120	140	129	132	116	121	123	119	108	114	136	107
20.6	126	139	133	125	117	133	116	120	127	152	134	116	122	132	104	121	148	137	134	120	125	127	124	108	114	139	105
20.6	128	142	137	129	119	135	118	122	130	157	138	116	124	133	110	124	151	140	135	121	134	129	124	110	116	142	109
20.6	132	148	139	135	120	139	121	125	131	162	137	119	122	135	116	131	154	145	140	123	144	132	124	113	120	147	114
20.6	134	150	140	139	124	148	125	127	132	169	137	124	130	143	118	135	157	146	140	124	150	140	121	119	125	155	123
20.6	134	151	145	146	132	153	127	132	133	173	134	125	133	148	123	141	162	151	144	127	157	142	125	122	127	163	127
20.7	136	154	152	146	139	155	134	139	140	172	141	128	144	152	130	143	167	155	152	132	167	147	126	126	125	166	133
20.7	137	154	154	153	146	159	142	140	139	175	143	131	148	158	132	146	168	160	154	138	169	154	130	134	126	171	138
20.7	146	157	157	152	150	157	146	143	144	178	145	132	156	165	134	151	169	166	155	142	172	159	129	141	129	175	140
20.7	151	164	157	152	155	157	155	149	144	178	148	136	165	172	136	150	166	168	158	146	174	165	132	147	132	178	147
20.7	158	167	160	158	155	161	161	153	142	175	151	141	167	171	135	152	166	171	159	150	175	170	134	153	133	181	151
20.8	164	169	161	156	155	160	161	156	142	167	151	147	173	169	136	155	162	172	157	150	171	177	138	159	135	179	153
20.8	165	168	162	157	157	159	161	160	146	164	152	147	175	168	141	159	160	175	160	149	164	180	141	160	142	173	155
20.8	164	165	159	155	152	159	163	158	150	152	152	149	173	166	145	166	160	172	157	151	157	178	144	161	142	164	153
20.8	162	163	155	155	147	154	166	155	154	144	155	148	167	161	147	162	154	169	151	153	155	175	148	161	145	154	145
20.8	159	155	152	155	144	150	163	153	154	139	154	148	164	158	149	161	150	164	146	153	150	170	151	160	147	149	142
20.9	159	148	144	150	142	142	160	150	153	137	147	145	158	152	149	158	142	157	144	149	151	162	148	161	149	142	141
20.9	153	142	137	145	138	137	155	143	152	138	139	143	150	148	150	154	139	148	140	142	142	158	149	157	151	140	138
20.9	148	133	132	139	137	132	151	135	150	139	132	140	143	145	146	148	137	139	134	132	141	151	147	149	150	134	137
20.9	139	129	125	135	136	126	142	132	146	135	128	138	136	136	145	143	132	132	136	127	141	145	148	141	145	129	130
20.9	134	122	121	128	137	123	140	130	144	133	127	134	130	131	136	135	132	128	138	122	140	138	138	132	137	125	128
21	127	123	119	127	135	121	137	126	138	136	120	125	119	126	128	131	129	120	134	118	135	132	133	128	135	123	127
21	126	122	117	122	133	118	131	122	134	136	116	122	117	125	121	124	132	118	134	113	133	128	127	121	133	123	123
21	121	126	117	122	130	119	125	119	125	136	114	120	115	122	111	121	134	114	136	112	129	123	123	115	128	123	120
21	122	127	117	121	125	125	120	117	119	135	115	114	109	119	102	118	134	115	133	115	127	124	116	116	122	125	116
21	122	126	116	119	123	129	116	117	117	130	115	112	107	114	101	118	135	114	132	116	117	121	113	115	121	124	115
21.1	122	128	113	121	122	130	117	118	114	127	114	112	107	118	100	120	130	114	132	117	116	117	110	113	120	124	113
21.1	124	129	116	123	116	131	117	114	111	126	117	110	108	116	99	120	131	117	128	120	117	115	109	116	115	128	109
21.1	123	131	117	125	112	130	116	111	113	125	117	106	110	115	99	113	124	119	128	124	114	118	106	119	112	130	103
21.1	123	125	119	124	114	130	111	111	111	128	116	103	113	117	99	112	120	122	129	126	113	115	106	121	109	129	104
21.1	126	121	121	124	115	129	111	112	114	127	118	99	113	117	102	111	117	126	129	127	112	113	109	120	109	128	107
21.2	128	120	119	123	113	128	110	113	116	126	119	100	114	118	106	111	115	121	125	122	110	112	114	119	110	130	110
21.2	124	119	117	124	114	126	109	113	119	123	121	98	114	115	106	113	114	120	123	118	116	111	113	115	110	127	108
21.2	120	119	115	124	116	125	105	115	121	120	121	101	118	113	105	113	113	120	122	120	120	111	113	118	108	126	107
21.2	117	117	116	124	117	124	108	114	123	119	121	103	117	112	105	114	116	121	119	119	122	108	110	113	107	125	111
21.2	113	120	116	127	112	120	110	112	122	122	121	104	119	112	109	114	119	121	116	120	124	108	111	116	111	124	111
21.3	112	120	113	124	113	118	109	110	122	121	121	110	121	116	107	116	123	122	117	118	124	110	111	111	115	123	109
21.3	109	124	114	126	113	116	109	108	122	121	126	110	121	117	103	121	124	120	115	120	122	109	108	110	114	118	106
21.3	110	122	114	129	110	117	113	107	121	122	124	113	119	117	103	120	127	122	114	123	125	111	107	114	116	117	106
21.3	109	123	112	129	109	118	116	109	117	121	122	122	119	121	102	120	128	122	113	124	121	111	109	111	118	116	105
21.3	109	123	114	126	110	118	119	110	111	122	120	127	122	124	101	120	126	121	113	125	122	111	110	118	115	118	104
21.4	105	125	116	130	109	118	120	111	109	125	120	125	125	125	101	119	131	124	115	122	119	113	111	118	114	121	103
21.4	105	124	117	125	112	118	118	112	109	125	118	126	127	126	102	116	127	129	121	119	117	117	109	119	112	120	102
21.4	109	120	119	120	112	118	117	113	108	129	119	121	125	127	103	116	125	132	124	120	115	116	112	120	110	120	104
21.4	113	117	120	122	113	119	118	118	107	131	118	117	122	126	99	116	127	132	121	118	113	116	116	123	110	123	108
21.4	117	118	121	125	113	119	115	119	106	129	116	116	120	126	99	117	126	128	121	115	112	115	117	124	114	124	107
21.5	112	118	120	125	118	121	111	120	109	125	113	114	116	127	94	119	128	131	121	115	114	118	117	126	114	124	107
21.5	116	119	120	125	118	127	107	120	110	123	111	117	115	125	96	118	131	131	121	118	115	117	120	130	113	126	111
21.5	117	121	119	128	120	125	102	118	111	124	114	115	115	122	96	119	132	126	123	116	117	118	119	128	116	126	116
21.5	119	126	116	129	117	125	102	117	114	122	115	114	115	120	99	122	133	125	126	117	117	117	120	131	116	127	115
21.5	119	129	112	125	119	126	99	113	113	120	113	114	114	117	98	126	129	120	127	115	122	118	118	124	118	126	113
21.6	119	134	114	126	117	127	100	113	114	117	115	111	111	120	99	124	128	117	128	114	126	116	119	124	119	127	115
21.6	119	128	116	128	115	126	105	111	112	120	109	115	110	122	103	120	127	115	128	114	128	114	119	122	120	131	116
21.6	116	132	117	126	118	128	109	111	111	120	111	117	113	124	101	120	124	110	124	112	127	113	119	121	119	135	116
21.6	115	130	116	128	119	129	112	110	112	118	113	115	114	122	105	119	124	104	122	110	126	112	121	123	118	140	114
21.6	114	130	113	130	120	124	116	109	114	122	115	115	117	122	106	121	123	106	120	105	126	115	121	121	114	144	117
21.7	114	126	114	126	125	124	117	111	117	124	116	115	120	120	108	119	120	108	119	103	128	118	120	122	110	145	119
21.7	116	124	113	123	122	122	119	111	117	124	119	115	120	118	112	118	121	110	119	107	125	117	119	121	105	149	120
21.7	118	124	116	125	120	123	122	114	118	128	121	117	120	116	109	114	121	113	119	109	124	117	120	122	106	148	124
21.7	118	124	118	124	120	120	118	111	118	128	123	120	120	115	113	113	122	112	122	109	121	115	119	120	110	143	124
21.7	119	124	114	122	123	122	115	113	117	131	122	122	115	115	111	112	126	114	120	110	121	121	123	121	109	140	124
21.8	123	126	114	123	120	121	112	118	116	133	126	120	117	112	114	113	129	113	122	113	124	119	124	120	109	137	121
21.8	121	128	115	123	124	118	104	118	110	135	128	116	121	110	114	113	128	114	127	115	124	119	122	120	107	131	121
21.8	125	131	117	123	122	120	100	120	106	133	125	115	122	111	116	116	130	121	125	119	130	118	122	122	107	130	120
21.8	126	132	118	125	119	124	95	122	101	133	120	112	121	112	115	118	127	123	126	121	131	116	122	120	113	129	119
21.8	127	132	121	131	119	126	92	125	104	132	120	108	119	119	114	117	126	126	126	124	134	112	123	118	114	129	120
21.9	122	130	122	134	120	125	93	128	104	134	118	110	117	121	111	117	127	128	123	128	137	110	120	116	116	128	118
21.9	123	130	123	138	122	128	94	128	106	133	116	108	118	122	107	121	127	127	121	125	140	115	119	119	112	132	116
21.9	121	130	122	142	125	127	97	125	108	133	114	109	116	124	108	123	128	128	120	124	142	117	119	117	113	132	115
21.9	119	130	121	142	129	123	100	127	113	133	116	111	119	122	106	124	128	133	122	122	142	120	120	118	112	132	116
21.9	118	129	124	140	132	126	101	128	118	129	117	111	118	125	107	124	130	132	122	124	141	123	119	119	111	132	115
22	122	125	127	138	131	124	106	122	123	130	117	115	122	127	111	120	132	129	125	125	138	126	117	118	111	137	119
22	124	124	130	137	133	126	114	118	123	130	118	114	123	124	108	117	131	126	128	125	134	125	117	117	111	135	120
22	125	122	130	135	132	126	116	113	123	133	120	113	120	126	110	115	135	125	129	120	128	127	121	118	109	138	116
22	127	122	129	132	133	131	118	112	122	135	121	110	115	127	110	115	136	125	129	121	124	131	124	118	106	136	113
22	125	118	128	132	134	134	119	114	119	136	123	106	117	128	112	117	134	126	131	121	122	128	126	120	105	136	109
22.1	121	119	131	129	139	136	117	109	114	136	127	103	121	127	112	116	136	128	133	120	120	124	124	120	108	134	110
22.1	124	120	133	130	135	137	120	111	110	134	123	103	122	130	110	117	141	133	130	121	122	124	123	121	112	136	114
22.1	122	121	131	135	133	141	118	114	109	137	127	100	121	130	107	120	142	132	129	122	121	123	123	120	113	134	113
22.1	119	120	132	139	131	139	117	116	111	140	129	101	121	130	106	116	142	137	125	122	129	120	117	118	115	133	118
22.1	115	121	134	140	131	137	121	121	109	140	131	106	121	129	102	117	143	138	125	121	133	119	113	118	115	130	117
22.2	117	123	135	141	132	138	123	122	109	140	133	107	127	128	100	116	146	139	126	117	135	126	110	119	114	131	116
22.2	115	128	134	140	131	137	122	122	109	137	136	107	131	128	101	117	148	142	125	115	136	124	112	118	118	129	115
22.2	118	128	132	138	132	135	127	126	112	135	135	109	132	127	102	117	148	140	128	114	136	124	113	116	118	126	118
22.2	119	126	136	138	131	134	127	123	112	134	134	112	136	132	104	115	147	139	126	114	133	127	113	118	117	129	118
22.2	122	124	136	136	130	130	129	120	114	135	130	116	138	133	107	113	144	135	126	113	132	125	116	118	115	129	119
22.3	124	125	137	134	132	131	131	118	113	133	130	113	136	133	106	114	140	133	126	116	130	121	118	116	112	127	117
22.3	128	123	138	129	128	130	126	118	115	135	126	115	133	138	109	119	139	132	126	117	126	118	121	118	109	132	116
22.3	126	125	134	127	129	131	126	119	116	134	123	117	133	142	113	120	136	132	126	121	125	115	121	117	108	131	117
22.3	124	122	130	125	127	129	124	121	115	136	121	118	134	140	117	121	133	133	127	122	123	115	124	119	108	135	115
22.3	121	128	132	119	127	126	123	118	117	139	120	118	134	140	119	123	135	132	129	119	127	115	120	119	112	137	113
22.4	123	126	131	122	122	124	122	120	119	141	117	117	131	142	122	122	136	129	127	122	130	116	121	120	112	138	114
22.4	123	129	126	128	123	122	119	123	118	143	120	116	130	140	123	119	139	128	125	120	134	117	119	119	113	139	114
22.4	123	128	126	128	121	120	121	122	123	140	119	118	127	140	124	117	135	131	125	120	140	117	113	123	116	139	118
22.4	125	128	125	131	124	122	119	125	127	135	120	115	127	138	122	118	134	130	124	119	139	119	115	122	116	139	114
22.4	126	126	122	131	126	125	116	126	130	133	124	112	129	139	122	114	138	131	124	116	139	124	113	122	118	141	111
22.5	128	126	122	131	126	125	116	122	128	133	124	108	130	136	123	113	137	130	122	111	139	126	117	119	122	139	110
22.5	128	125	121	133	127	125	117	122	128	132	124	109	124	134	120	110	138	131	124	108	138	127	119	118	121	137	110
22.5	126	123	123	130	127	125	115	117	126	132	123	110	123	134	119	108	137	132	120	106	136	130	120	120	121	137	109
22.5	128	122	125	131	127	128	113	117	120	132	123	106	121	132	115	106	138	132	118	109	133	130	123	121	123	133	110
22.5	130	123	128	129	127	131	110	118	120	134	125	108	121	134	112	108	140	132	117	111	129	130	124	115	123	130	112
22.6	130	126	127	129	127	132	108	118	120	135	127	110	122	133	112	111	145	132	123	110	125	129	125	116	122	130	117
22.6	130	129	127	129	127	132	109	118	119	138	125	114	124	136	113	111	144	134	125	108	125	128	124	118	122	131	118
22.6	129	129	126	124	125	133	109	118	117	140	126	117	122	134	114	114	144	131	126	107	123	128	127	119	119	136	118
22.6	127	137	127	123	126	135	111	120	118	143	126	115	123	132	112	117	145	130	127	108	123	123	130	121	122	136	118
22.6	127	136	129	128	125	132	114	121	118	142	121	117	124	131	110	116	148	126	129	114	126	121	131	123	122	136	117
22.7	130	140	128	126	124	131	117	125	118	137	120	117	126	132	108	117	149	127	130	114	128	124	129	121	122	137	115
22.7	128	137	127	121	121	135	121	124	120	132	118	121	124	137	106	121	145	127	126	117	129	122	125	122	121	136	116
22.7	132	135	128	122	123	136	120	128	121	133	120	121	124	140	105	124	146	126	124	116	128	120	127	123	120	137	113
22.7	132	135	128	121	123	132	124	127	120	133	122	122	123	144	104	124	142	125	125	116	131	122	125	124	121	134	107
22.7	132	133	129	120	123	131	126	124	117	134	125	125	123	144	106	126	137	126	125	114	131	126	125	124	123	133	107
22.8	127	127	129	119	122	130	125	122	117	133	125	125	119	144	106	124	133	123	124	116	133	125	126	128	119	133	105
22.8	128	124	129	116	120	131	124	118	119	134	124	124	121	145	108	125	133	124	120	118	131	129	124	128	118	134	108
22.8	127	122	130	120	118	132	124	115	119	137	126	122	123	144	109	126	132	124	120	119	130	130	123	127	121	132	109
22.8	124	123	130	119	119	134	123	112	123	138	127	125	122	144	116	129	133	122	123	116	128	133	122	124	119	133	110
22.8	129	122	130	123	122	135	122	111	124	140	128	126	121	139	118	132	137	121	129	112	129	130	122	123	116	132	115
22.9	129	122	129	125	126	135	121	114	125	141	129	125	122	142	117	131	142	122	127	110	131	127	121	121	115	133	119
22.9	129	124	127	127	128	133	121	116	125	140	127	120	123	139	119	128	143	119	129	110	129	124	124	117	115	133	124
22.9	128	129	126	130	131	135	119	118	126	142	122	119	127	137	116	127	145	122	127	112	129	121	125	117	116	131	127
22.9	129	125	125	133	131	134	117	123	126	143	119	118	125	138	116	127	148	121	132	112	134	123	124	116	114	132	127
22.9	131	125	123	132	131	135	114	124	125	137	121	117	127	139	117	126	151	125	131	111	135	125	122	115	115	131	129
23	130	126	125	136	130	137	115	126	123	137	122	119	130	143	117	126	153	132	128	115	135	125	121	116	115	132	133
23	134	130	132	139	132	136	114	127	119	141	125	119	132	142	116	125	152	138	131	119	136	124	123	121	117	135	133
23	131	133	134	145	132	132	116	128	117	141	126	116	135	141	116	126	145	141	132	120	141	124	121	123	119	134	130
23	131	130	134	141	133	133	113	130	114	142	130	117	136	139	117	123	144	142	132	126	142	126	123	123	121	138	129
23	130	130	136	140	132	132	112	129	115	142	129	118	138	138	119	119	143	142	129	128	146	126	127	124	124	141	126
23.1	133	130	137	140	131	134	111	129	118	141	127	119	139	138	122	119	144	148	126	131	146	129	126	124	126	143	126
23.1	131	131	138	140	130	131	114	127	120	142	125	121	139	136	125	122	146	147	127	129	147	131	125	126	128	141	125
23.1	132	131	138	140	130	133	116	127	121	137	123	123	138	133	126	124	146	147	130	128	147	132	122	122	126	144	122
23.1	135	130	136	141	131	134	114	126	123	140	123	125	138	130	124	122	148	148	135	124	146	129	121	121	122	140	122
23.1	134	131	132	141	133	134	117	125	128	139	122	121	136	132	121	120	150	145	135	125	143	129	121	120	120	137	121
23.2	135	130	130	138	130	131	121	124	130	142	120	121	133	131	118	120	147	141	137	127	138	126	119	120	119	136	123
23.2	136	130	128	137	131	133	125	127	131	144	119	125	126	132	116	123	144	140	136	126	136	125	118	125	117	135	122
23.2	136	130	124	138	132	134	128	128	133	144	123	127	121	132	114	125	139	138	142	125	135	125	120	125	118	133	125
23.2	135	132	127	139	132	134	135	127	132	144	123	125	120	129	114	124	139	136	143	128	130	130	120	124	120	131	127
23.2	138	134	130	142	129	133	137	127	128	147	123	124	121	132	113	121	135	135	142	131	129	129	120	126	116	130	129
23.3	138	137	135	142	128	135	136	125	125	152	122	119	124	131	111	122	131	132	144	133	126	126	121	129	120	131	130
23.3	135	136	134	140	128	131	131	132	123	153	122	115	127	127	112	122	129	128	142	132	131	125	124	131	120	129	131
23.3	135	132	134	133	127	133	128	136	121	151	124	119	128	130	112	118	132	125	138	135	131	127	127	130	124	130	131
23.3	137	135	136	133	128	132	124	136	120	152	125	119	131	134	115	115	133	128	134	131	135	131	127	126	125	133	132
23.3	138	135	134	129	128	134	120	131	120	152	127	119	132	135	117	113	133	129	135	132	136	137	126	125	124	134	134
23.4	133	136	132	126	125	131	120	129	120	153	129	117	140	139	117	116	138	127	136	131	136	138	123	123	123	132	132
23.4	131	133	132	125	124	134	117	123	124	149	129	119	140	141	116	118	135	129	136	132	138	138	121	119	124	132	131
23.4	126	133	131	123	124	135	112	117	123	150	131	117	143	141	115	117	140	128	138	128	137	136	123	119	120	134	131
23.4	126	130	134	124	127	138	115	120	126	146	132	117	141	142	113	116	144	126	141	129	137	137	125	117	120	134	131
23.4	126	129	137	123	128	134	118	118	126	148	136	120	141	143	112	116	144	126	144	129	136	136	124	116	123	136	133
23.5	126	128	137	123	131	135	121	120	130	145	135	122	137	143	115	119	139	125	141	128	137	136	126	118	123	136	134
23.5	126	131	135	125	131	135	124	119	136	143	138	121	135	142	115	123	140	126	141	129	138	135	126	117	124	133	131
23.5	131	128	134	125	128	137	126	119	135	144	136	119	131	141	116	125	138	125	141	131	137	136	128	118	121	134	131
23.5	132	128	132	127	127	135	128	118	131	141	132	118	130	139	119	124	137	127	139	131	140	132	124	124	119	134	131
23.5	129	127	133	123	126	131	129	125	130	142	127	115	131	138	120	127	137	127	137	129	136	129	123	126	122	132	134
23.6	132	125	132	125	126	125	126	131	132	140	123	115	129	133	119	124	136	127	136	125	139	129	122	129	122	128	135
23.6	134	122	132	127	123	126	126	131	129	142	125	118	125	135	118	123	136	128	134	121	137	131	121	131	125	131	134
23.6	137	128	130	128	127	125	123	126	126	142	123	118	120	134	121	124	135	131	137	118	137	136	119	133	123	133	131
23.6	135	127	127	124	128	126	124	122	125	139	123	120	118	133	120	124	131	129	136	120	135	136	121	136	122	132	127
23.6	132	127	125	125	128	124	125	120	122	139	120	121	124	134	118	126	132	132	137	118	134	134	117	137	122	133	125
23.7	128	122	130	126	125	124	128	119	121	137	120	127	124	136	118	125	130	131	134	115	134	135	119	135	123	136	123
23.7	125	121	128	126	126	127	131	120	118	134	121	122	128	132	113	121	133	130	137	112	135	134	121	134	122	138	120
23.7	127	118	128	129	123	129	130	121	118	134	123	124	131	132	112	116	135	129	135	112	138	134	125	130	121	138	118
23.7	125	118	128	127	126	129	131	115	118	134	125	128	133	132	112	118	135	127	131	108	137	132	123	126	117	135	117
23.7	123	117	128	125	128	132	131	118	122	134	127	125	134	130	110	124	134	128	124	109	139	130	126	122	116	134	116
23.8	120	120	124	129	128	134	128	117	122	134	131	123	134	129	108	126	137	126	124	112	141	130	127	120	118	132	110
23.8	124	119	122	126	123	135	127	117	119	132	132	123	135	127	109	125	136	132	121	114	143	130	126	119	120	134	115
23.8	122	121	125	129	125	132	129	122	119	130	132	121	135	125	111	123	139	132	122	116	142	125	124	117	121	135	116
23.8	124	123	128	132	123	131	127	127	122	132	131	116	133	129	109	123	139	134	121	115	139	123	127	115	119	131	121
23.8	127	127	131	139	123	130	124	125	125	129	135	113	126	131	106	120	138	135	123	118	137	122	127	114	117	131	120
23.9	125	131	131	138	121	132	122	124	125	132	140	115	120	133	106	124	139	137	125	118	134	125	130	114	117	131	120
23.9	126	137	130	137	122	130	121	120	126	132	139	113	115	135	107	124	138	137	128	122	133	126	130	115	115	132	117
23.9	124	139	126	137	123	128	122	122	128	132	138	114	117	134	109	119	135	136	127	124	134	126	131	117	112	133	116
23.9	122	139	123	137	120	130	124	120	129	134	134	111	119	135	109	117	135	137	130	121	131	126	131	119	110	135	115
23.9	119	135	122	134	120	133	129	123	130	136	136	109	120	136	111	115	136	135	130	120	130	129	128	120	107	136	112
24	120	135	117	129	121	138	129	122	131	136	133	105	118	131	109	111	133	138	131	122	132	126	127	123	106	133	113
24	123	133	118	126	123	138	126	119	130	138	134	108	119	128	113	112	134	134	126	119	130	124	129	124	105	133	115
24	122	131	119	122	126	142	127	116	131	134	132	114	120	125	113	116	133	129	125	118	130	126	126	121	106	131	115
24	117	128	118	120	129	141	127	116	130	132	131	113	122	122	111	120	133	127	124	116	129	127	125	121	112	130	113
24	116	126	119	119	132	141	125	114	128	131	127	116	126	120	112	119	136	122	127	117	127	129	124	123	116	133	112
24.1	121	123	125	118	131	142	125	117	126	128	124	118	124	120	113	121	137	123	126	118	128	126	120	123	119	136	115
24.1	124	121	129	119	136	142	124	120	125	127	121	121	123	119	111	124	136	121	132	117	129	124	124	117	119	137	116
24.1	122	121	133	119	138	142	124	118	123	132	119	119	117	123	107	126	137	120	130	116	129	120	124	119	116	132	119
24.1	121	122	134	119	135	135	120	115	119	131	124	119	114	127	106	128	132	118	130	118	126	120	123	119	115	131	120
24.1	121	128	134	120	132	131	120	116	118	136	123	119	116	130	106	129	130	118	132	117	127	123	122	118	118	128	125
24.2	119	128	131	122	132	127	115	114	116	140	119	117	120	133	108	126	127	118	130	120	128	124	120	119	118	128	127
24.2	121	129	128	125	132	124	116	119	117	141	117	115	121	131	110	124	125	120	132	118	130	124	119	122	117	126	130
24.2	123	132	129	125	127	122	113	116	116	144	116	111	121	130	111	125	126	122	131	120	128	122	121	123	118	127	131
24.2	127	131	123	124	127	122	112	115	114	148	115	110	127	131	113	127	125	125	127	119	133	119	121	124	119	128	131
24.2	131	133	125	125	120	123	111	115	115	145	116	109	125	129	109	123	121	129	124	121	128	117	121	125	121	125	131
24.3	131	129	122	125	117	122	108	117	115	142	118	109	128	130	111	127	122	127	119	118	125	117	120	123	123	126	127
24.3	131	127	118	128	115	125	110	113	118	142	117	110	130	129	109	124	123	126	117	117	123	117	119	121	124	126	122
24.3	127	126	114	124	117	125	111	115	119	141	117	108	129	125	107	123	124	129	117	116	119	111	117	123	123	130	117
24.3	129	126	117	121	118	128	115	117	118	139	115	108	132	119	108	123	129	131	120	115	120	107	116	121	118	132	111
24.3	131	123	120	121	117	135	117	121	118	140	116	109	127	118	106	127	131	132	119	114	123	104	112	117	117	132	108
24.4	130	126	120	120	120	137	117	117	114	141	119	109	124	118	106	126	130	131	120	113	127	104	109	115	114	132	107
24.4	129	123	121	119	120	138	121	116	112	143	119	107	122	121	105	127	132	128	115	111	127	107	103	117	111	131	103
24.4	129	124	123	118	119	135	121	119	112	138	121	108	124	124	106	128	130	124	119	113	127	113	102	117	108	131	104
24.4	128	128	123	118	121	133	122	121	116	136	118	111	125	127	108	129	131	123	123	117	129	119	95	118	106	131	107
24.4	128	125	123	117	120	132	118	119	121	136	111	113	127	127	110	128	128	125	125	117	129	123	96	119	105	131	111
24.5	128	129	127	120	121	129	122	119	123	131	115	114	125	126	110	131	128	126	128	118	128	127	99	116	104	127	112
24.5	124	134	129	119	119	125	121	116	120	128	116	112	130	128	112	132	131	126	127	122	126	128	104	118	106	125	113
24.5	122	134	127	119	120	129	124	116	120	127	115	113	130	132	110	134	130	127	127	120	124	130	109	118	105	120	114
24.5	120	133	129	120	118	128	123	120	122	124	120	112	126	134	107	128	131	128	129	123	117	133	111	119	103	120	118
24.5	116	132	127	121	121	125	119	119	121	122	121	112	124	138	110	130	129	130	127	118	114	133	113	118	106	121	119
24.6	114	131	125	120	121	125	122	117	120	126	121	112	121	136	109	126	129	132	126	117	110	126	117	120	108	122	122
24.6	115	130	121	121	123	124	121	119	121	126	124	112	121	134	108	128	129	135	126	116	109	120	117	121	107	125	122
24.6	115	131	125	120	123	125	123	118	116	126	128	110	124	133	110	128	130	136	125	114	111	115	120	123	109	127	121
24.6	117	128	125	125	123	130	121	116	115	133	127	111	114	134	105	130	130	136	122	113	110	115	121	121	114	128	123
24.6	120	130	127	126	123	128	121	112	111	135	130	109	112	136	105	127	131	132	118	114	114	114	118	121	113	128	119
24.7	124	129	125	128	123	128	121	111	112	140	127	112	113	135	106	125	134	129	114	118	117	115	118	119	115	131	116
24.7	126	128	126	127	126	125	120	111	110	137	122	114	115	131	104	123	135	126	117	120	120	115	116	120	115	131	115
24.7	130	129	122	125	124	124	116	113	113	140	119	115	116	132	102	122	135	124	119	123	120	118	113	119	117	133	115
24.7	130	130	120	127	125	124	114	111	115	144	113	113	118	130	102	119	127	124	119	125	120	118	117	114	118	134	114
24.7	126	134	123	126	126	124	119	109	115	140	112	113	121	129	104	116	128	123	120	124	121	120	117	110	118	131	112
24.8	125	132	121	127	122	124	119	110	113	139	108	113	126	127	106	111	132	124	122	124	119	122	119	111	116	127	110
24.8	123	132	118	129	119	127	117	112	117	139	107	112	125	125	107	111	134	129	122	125	117	124	120	111	111	128	113
24.8	124	129	116	128	116	127	116	114	119	138	108	114	126	126	110	109	134	132	122	123	118	124	118	113	109	130	114
24.8	120	126	115	126	116	124	117	115	121	132	107	114	125	123	113	110	138	133	121	119	119	122	118	114	113	131	115
24.8	114	124	111	126	114	122	118	116	120	129	109	111	125	121	113	112	140	134	122	115	121	120	118	114	112	129	119
24.9	115	123	113	128	118	120	116	120	125	129	111	106	125	121	110	116	140	138	119	114	122	120	119	117	110	132	118
24.9	113	123	121	127	119	123	119	120	126	126	116	103	120	120	111	116	142	136	123	112	123	120	121	120	112	130	119
24.9	114	121	121	131	121	126	118	119	127	126	117	104	116	119	108	116	143	134	125	109	124	117	118	116	111	130	119
24.9	112	122	127	132	125	123	116	117	125	125	121	105	118	120	110	119	144	131	122	108	128	117	118	114	108	127	116
24.9	111	123	128	134	127	123	114	119	125	127	122	106	116	118	109	119	146	131	124	111	130	118	117	115	111	129	116
25	114	123	129	132	130	123	114	121	120	121	123	105	115	118	106	122	143	132	123	112	133	120	115	114	113	131	117
25	115	124	131	132	130	125	115	122	120	127	125	104	116	120	104	125	143	129	123	116	129	121	114	112	115	134	115
25	115	125	130	135	131	124	118	119	121	131	124	105	117	122	106	126	135	127	124	116	128	119	115	111	116	138	114
25	117	122	136	131	125	124	119	116	118	134	121	107	123	124	108	124	137	127	124	115	128	119	115	111	115	138	111
25	122	120	135	131	121	127	119	111	117	137	121	112	125	123	109	126	137	127	127	116	128	120	116	110	113	137	109
25.1	125	122	131	133	119	127	119	108	119	138	125	113	125	127	109	130	138	130	126	118	125	119	113	113	114	140	112
25.1	127	119	130	130	121	126	121	105	119	138	129	112	125	125	110	133	133	130	127	117	127	118	114	115	115	136	112
25.1	126	124	128	128	122	124	123	105	117	138	132	110	123	123	111	132	136	133	125	119	123	118	113	114	116	138	114
25.1	126	124	127	127	121	122	124	104	116	137	134	106	120	124	110	131	135	134	122	118	124	120	112	113	114	134	114
25.1	128	126	127	125	125	123	124	106	121	137	133	106	120	125	110	128	133	134	121	118	125	119	111	114	112	134	109
25.2	129	124	129	123	126	124	124	109	126	132	133	107	119	128	111	124	133	130	127	117	127	118	109	110	113	130	109
25.2	129	122	128	123	127	122	122	113	125	130	132	109	120	127	109	121	130	126	128	117	130	116	108	107	112	130	107
25.2	125	123	130	123	128	123	118	117	127	127	129	107	119	123	111	119	130	128	125	115	133	118	114	106	111	126	108
25.2	126	122	126	125	124	124	117	122	127	124	128	106	119	119	110	114	129	128	126	119	134	117	111	106	114	127	110
25.2	128	123	124	128	122	127	119	123	126	121	124	107	120	118	108	112	128	127	125	121	133	117	112	104	114	128	114
25.3	125	119	125	128	125	126	121	127	127	123	120	110	124	119	108	114	129	121	129	124	131	119	111	109	114	130	115
25.3	127	114	123	130	122	127	121	130	122	124	114	113	126	117	109	114	127	116	129	125	129	118	112	109	114	130	117
25.3	126	113	128	130	120	129	119	130	119	130	112	116	130	118	110	111	131	114	129	126	127	122	115	111	111	130	118
25.3	129	114	125	129	120	130	120	128	121	132	113	119	129	116	109	113	131	117	129	123	127	124	119	111	113	131	120
25.3	132	123	122	132	123	127	118	126	119	135	116	118	125	119	103	111	132	120	128	126	127	125	119	114	117	130	122
25.4	135	126	123	128	124	128	116	122	115	135	116	115	126	119	102	113	132	121	125	129	125	124	121	115	116	130	123
25.4	136	133	124	127	126	126	118	117	112	139	116	119	128	124	99	113	135	123	120	128	124	124	120	116	113	130	121
25.4	138	135	127	126	128	127	119	116	112	138	117	117	127	129	99	113	138	127	120	124	130	123	121	116	112	129	116
25.4	140	138	125	128	127	125	118	114	113	135	116	119	131	136	99	113	138	125	123	126	132	124	120	118	109	129	114
25.4	137	140	130	130	128	129	117	114	116	137	113	117	131	138	100	116	139	124	126	125	137	126	118	116	110	130	114
25.5	134	137	132	133	124	132	118	111	118	139	114	117	131	137	100	116	137	127	128	125	141	127	118	117	107	131	111
25.5	130	137	132	132	124	139	120	111	121	136	116	117	132	135	103	115	135	129	130	123	142	125	117	118	106	134	110
25.5	129	136	136	136	120	141	121	110	121	139	119	122	135	137	105	114	133	130	130	122	147	125	116	121	108	138	110
25.5	128	136	137	142	119	145	121	109	124	134	118	125	135	136	107	115	134	128	133	124	147	121	114	121	109	143	114
25.5	125	128	137	147	121	143	118	111	123	137	121	122	133	139	109	120	138	127	136	127	147	125	110	127	110	147	115
25.6	125	125	137	153	121	146	119	114	122	143	120	117	133	138	113	122	138	126	132	126	147	126	110	125	113	148	116
25.6	125	129	137	157	124	146	120	116	129	148	128	116	133	143	117	124	143	128	133	124	147	131	113	123	113	152	117
25.6	130	134	134	156	125	148	119	117	132	150	133	116	132	145	118	124	146	131	134	124	149	130	113	119	119	159	119
25.6	130	141	135	159	130	149	120	116	132	152	134	118	129	148	113	128	150	132	133	124	149	130	113	122	123	161	122
25.6	132	145	137	157	129	153	122	117	133	155	139	121	135	151	115	131	156	131	138	124	148	129	119	122	123	165	128
25.7	135	148	141	162	134	152	125	121	134	161	143	122	141	155	113	142	156	135	144	121	155	133	125	124	125	175	130
25.7	143	157	146	165	140	158	125	131	137	171	152	125	143	161	120	147	167	141	152	125	159	138	132	126	125	181	136
25.7	143	162	149	171	147	168	130	136	140	178	154	130	148	173	122	154	176	144	164	128	161	146	137	130	128	187	140
25.7	145	170	159	175	156	181	133	138	142	193	157	136	154	180	123	160	187	154	170	131	166	152	148	132	131	191	145
25.7	149	170	166	183	163	190	135	140	147	201	165	143	164	191	126	163	197	162	180	136	171	155	152	135	134	196	149
25.8	153	182	180	189	174	200	146	144	153	212	169	149	177	202	133	172	208	173	194	139	179	156	162	140	140	207	155
25.8	161	193	192	195	183	211	153	152	159	226	173	158	187	210	136	176	221	184	200	150	191	159	170	148	147	217	163
25.8	170	202	201	206	192	224	156	156	163	236	176	158	197	217	142	183	233	192	210	164	201	161	174	155	157	227	168
25.8	184	211	210	220	205	233	165	164	172	248	184	162	208	228	145	195	254	202	217	175	215	175	179	163	164	231	173
25.8	197	223	222	231	215	239	177	175	181	256	191	166	223	237	155	202	265	211	224	184	226	187	188	171	174	242	182
25.9	214	234	230	238	225	243	184	189	192	258	199	180	231	247	163	209	273	218	233	196	240	200	198	179	180	248	189
25.9	229	240	235	245	232	245	194	196	199	257	210	186	242	257	170	215	276	222	239	207	246	213	202	191	187	253	196
25.9	238	245	237	250	238	243	206	207	213	252	215	195	247	259	177	226	277	224	242	215	257	225	206	208	191	256	204
25.9	248	250	241	250	239	242	218	215	221	255	226	203	254	262	184	235	278	227	247	219	267	236	215	218	199	261	209
25.9	256	247	245	251	244	246	225	225	226	260	238	207	258	263	191	247	271	232	248	224	269	247	220	229	205	266	214
26	260	252	247	250	246	252	234	231	231	268	247	215	255	265	205	253	277	236	243	231	270	254	224	240	208	270	218
26	256	251	245	253	244	255	239	232	231	271	251	219	255	268	209	256	280	244	243	236	265	255	228	249	217	273	221
26	258	256	247	261	243	254	238	226	230	274	252	225	258	269	214	255	287	245	246	241	262	249	236	253	219	273	228
26	253	254	246	266	239	259	237	227	231	282	251	228	258	270	221	254	287	251	253	239	261	239	236	250	225	276	231
26	251	260	250	267	244	270	240	227	233	292	252	231	262	270	222	256	291	260	261	236	267	229	239	248	229	285	236
26.1	254	262	252	270	246	278	236	227	235	304	256	233	254	271	223	256	297	264	264	242	268	229	238	243	232	291	238
26.1	257	271	257	280	252	291	228	223	237	312	253	233	261	277	221	259	306	268	269	241	276	227	238	240	232	296	238
26.1	266	278	269	295	264	299	232	226	244	321	255	239	268	283	218	263	316	276	275	245	288	231	244	238	232	302	242
26.1	275	290	278	305	274	300	233	233	253	327	255	242	277	290	222	261	316	285	283	252	302	242	245	242	233	309	247
26.1	291	297	290	313	288	303	241	249	259	328	260	249	282	296	222	267	321	292	290	254	318	251	250	244	237	308	246
26.2	304	301	296	319	302	302	251	254	268	328	265	253	290	301	227	272	322	296	298	256	327	264	248	256	244	314	249
26.2	309	308	297	319	315	302	258	265	281	325	269	257	303	304	233	278	323	303	304	262	337	282	252	267	250	314	255
26.2	314	309	308	317	326	305	269	270	286	325	280	262	309	304	242	287	323	306	304	261	341	295	260	275	259	313	256
26.2	316	309	312	311	327	308	279	276	292	319	287	262	311	307	253	294	317	308	300	268	336	311	262	286	261	311	258
26.2	314	304	306	307	325	305	291	281	293	316	285	261	312	307	265	292	315	314	294	273	331	315	268	300	266	311	259
26.3	310	299	302	305	316	297	295	284	289	305	285	264	313	309	275	291	312	317	289	279	324	319	276	304	271	312	267
26.3	304	292	297	302	306	296	296	285	288	300	279	262	311	314	283	291	318	311	292	278	321	312	281	306	273	311	276
26.3	288	285	289	299	292	303	297	282	281	309	279	266	302	317	285	286	313	310	286	272	312	305	279	297	276	316	282
26.3	279	280	285	301	285	305	295	272	270	312	278	269	301	325	281	287	318	304	288	271	308	297	273	285	281	326	287
26.3	272	276	289	314	276	309	281	260	258	325	274	263	294	330	282	286	328	298	289	271	306	286	270	275	273	330	289
26.4	265	280	295	330	272	322	271	253	247	345	263	264	300	340	270	287	338	295	295	268	316	270	271	267	268	343	290
26.4	270	293	311	348	278	332	275	247	242	369	264	265	304	348	264	286	349	298	303	273	332	262	276	261	271	357	290
26.4	278	311	324	368	293	346	274	246	242	393	266	271	310	355	261	294	368	306	313	275	357	261	274	256	275	369	294
26.4	293	324	352	389	305	360	279	254	249	413	278	279	318	362	256	310	392	320	329	276	377	262	279	251	277	379	303
26.4	308	344	369	408	322	369	284	257	263	433	290	282	328	370	258	328	411	333	353	283	395	274	286	254	286	402	312
26.5	324	361	387	426	344	379	288	275	278	446	310	287	341	378	262	351	425	344	372	293	411	296	296	262	291	408	313
26.5	349	375	404	443	363	379	307	290	295	445	330	298	348	379	270	378	427	358	381	305	429	311	308	278	295	412	314
26.5	371	388	412	454	378	378	329	311	317	436	346	306	358	385	283	405	424	373	386	322	439	343	318	297	301	410	316
26.5	394	392	416	460	393	376	360	341	339	418	358	315	367	384	303	420	426	391	388	331	436	369	331	317	306	405	326
26.5	405	390	416	458	396	364	381	369	358	387	368	330	370	383	325	439	427	397	377	339	432	400	342	336	318	396	338
26.6	406	382	404	446	393	352	406	393	381	358	373	334	372	376	340	445	431	395	372	349	415	416	348	354	325	380	347
26.6	401	369	389	432	384	333	428	407	388	325	377	343	366	362	356	440	420	389	354	353	386	429	352	363	333	365	354
26.6	396	345	365	410	370	310	439	413	381	287	366	344	360	348	368	428	406	373	338	361	355	424	349	369	338	342	351
26.6	381	313	340	384	351	291	429	413	372	255	353	335	343	327	376	406	395	351	315	357	324	411	350	369	329	315	349
26.6	358	285	310	348	322	269	418	404	354	227	334	334	321	310	375	375	372	325	289	347	292	387	339	357	323	292	341
26.7	331	264	281	307	299	247	403	381	332	199	310	324	295	289	370	339	349	298	258	331	263	355	326	341	318	268	331
26.7	296	230	253	269	271	227	370	355	308	180	283	312	268	267	361	307	326	273	231	312	238	318	309	318	302	241	322
26.7	260	208	230	236	235	207	335	322	282	163	259	293	240	245	340	271	297	243	207	290	205	279	288	289	282	218	308
26.7	226	187	203	205	205	186	293	288	248	158	237	267	209	222	317	239	267	212	185	263	183	239	267	261	266	208	279
26.7	201	169	181	180	183	170	253	256	213	153	214	245	183	201	286	209	230	185	167	237	165	202	243	237	241	189	251
26.8	181	160	159	164	160	156	221	222	182	146	189	224	163	182	255	187	192	169	147	213	155	170	219	214	216	178	228
26.8	161	150	149	150	147	151	192	196	160	148	168	201	153	166	229	168	165	153	138	190	143	154	196	190	195	165	204
26.8	144	143	143	141	137	146	173	175	142	145	149	178	141	151	203	153	151	144	128	168	132	141	177	170	172	155	185
26.8	129	139	134	133	130	137	149	157	135	145	135	161	135	136	177	141	145	134	127	150	131	130	159	156	159	144	167
26.8	122	135	130	129	127	133	141	146	132	146	128	147	134	124	155	130	144	130	131	140	130	125	148	142	144	141	155
26.9	118	132	129	131	127	130	133	135	123	144	121	134	129	120	141	128	140	130	130	130	127	122	135	130	135	138	144
26.9	119	128	124	132	125	129	129	130	120	140	117	125	132	114	126	123	140	129	132	126	123	120	127	122	126	135	135
26.9	118	123	124	132	126	126	121	125	123	136	116	117	131	113	119	122	145	132	133	121	126	123	123	113	119	134	131
26.9	117	123	123	131	122	123	121	122	123	134	112	116	129	113	120	121	145	136	132	117	127	120	113	105	113	134	126
26.9	117	120	122	133	121	125	117	118	123	130	108	115	128	112	117	121	148	138	130	114	126	118	114	106	112	134	121
27	114	116	119	131	117	123	114	116	124	130	108	117	130	113	120	122	149	138	127	115	126	119	115	110	110	132	117
27	113	120	115	135	114	124	114	114	120	126	114	115	130	115	118	122	148	138	124	113	121	118	114	111	112	131	113
27	118	116	114	131	114	125	114	115	118	127	125	113	129	116	118	119	148	139	125	110	122	118	116	111	114	132	105
27	121	121	111	127	113	126	117	111	114	124	126	109	130	118	118	118	143	140	128	109	120	117	115	112	113	134	103
27	120	121	107	128	109	128	118	112	112	125	128	110	129	119	117	121	136	141	130	108	121	118	113	111	113	138	102
27.1	120	117	109	125	113	128	120	112	110	127	133	107	132	120	114	120	135	137	130	112	121	119	114	111	116	135	97
27.1	121	119	104	122	114	129	121	111	110	127	134	103	124	123	110	121	133	132	129	112	121	120	113	111	115	134	95
27.1	124	119	104	123	115	125	119	113	110	125	133	105	119	126	107	118	134	127	130	112	124	117	113	110	114	135	97
27.1	125	117	107	126	117	125	120	116	107	123	133	107	116	130	100	120	131	128	125	111	122	119	114	109	116	138	103
27.1	125	121	109	128	118	124	122	117	107	121	130	106	111	135	100	120	126	131	121	107	120	116	107	109	116	134	103
27.2	125	119	109	129	116	120	123	118	112	117	127	108	111	130	98	118	125	133	116	109	120	115	106	110	117	135	107
27.2	128	118	113	128	117	117	121	117	113	116	120	108	107	131	102	117	126	132	111	107	121	115	107	109	118	132	108
27.2	128	118	116	129	117	116	121	119	115	119	117	109	105	129	105	115	126	129	109	105	118	114	110	106	115	134	109
27.2	125	118	116	133	116	119	118	120	115	119	114	109	106	129	107	109	128	124	109	105	115	116	111	107	111	129	106
27.2	123	119	115	130	113	118	115	119	117	123	112	109	109	131	107	105	130	123	110	105	114	115	110	108	109	127	106
27.3	122	116	117	130	114	118	112	119	117	121	118	108	112	129	106	106	132	121	112	103	111	116	109	106	110	121	104
27.3	118	119	118	128	116	121	114	116	118	123	121	107	114	125	105	102	129	119	116	101	112	113	110	108	105	117	99
27.3	114	124	117	128	114	121	113	116	118	123	119	107	117	123	104	102	131	118	119	105	116	112	107	111	101	117	101
27.3	110	124	117	129	116	121	113	120	121	126	119	111	119	121	102	108	129	118	126	107	118	111	103	113	101	115	101
27.3	109	125	117	129	119	123	115	120	120	128	120	114	120	122	100	108	130	117	128	109	121	112	102	114	101	116	100
27.4	112	128	117	127	122	123	112	119	120	131	119	116	116	121	101	111	131	115	132	109	119	112	105	117	100	117	101
27.4	115	125	120	129	122	119	113	119	117	129	118	116	115	123	102	115	129	116	132	114	120	113	103	113	101	121	106
27.4	115	123	119	131	127	117	113	118	119	127	120	116	112	124	102	118	127	120	130	117	118	112	102	116	103	125	108
27.4	115	125	118	129	123	115	114	115	120	128	118	117	110	122	106	118	124	123	129	116	118	113	100	115	104	128	107
27.4	115	123	117	127	122	114	113	112	120	126	119	116	112	115	107	119	122	120	129	119	119	115	103	117	104	132	107
27.5	116	122	117	127	125	112	112	112	120	124	117	116	114	114	109	117	125	118	128	116	120	118	108	116	106	130	107
27.5	116	120	115	127	125	114	112	112	120	122	119	111	115	117	112	114	122	113	130	115	121	118	113	112	103	133	106
27.5	112	118	113	126	123	115	112	111	115	119	114	107	115	117	114	111	123	113	129	115	120	118	115	111	100	128	101
27.5	110	116	113	121	115	118	113	111	115	118	114	105	117	118	110	109	125	115	126	110	124	117	118	110	102	129	101
27.5	108	111	113	122	114	117	115	108	113	113	112	104	117	117	108	108	123	114	124	107	125	114	120	107	101	123	100
27.6	107	117	111	122	115	120	120	107	113	112	112	104	119	116	106	107	122	117	125	103	124	109	121	112	100	120	98
27.6	108	120	109	122	114	122	120	107	116	112	110	104	123	115	106	109	124	120	121	106	124	107	119	116	103	119	100
27.6	107	118	113	120	113	121	120	109	118	118	110	106	122	114	104	113	122	123	122	108	121	105	117	115	104	117	98
27.6	110	117	112	121	114	123	119	108	117	121	113	107	122	115	103	114	123	125	121	110	117	104	115	113	102	119	101
27.6	115	119	117	119	116	121	119	108	117	125	113	106	120	114	106	120	123	124	118	114	116	105	116	111	104	115	103
27.7	117	119	119	120	113	120	121	111	113	124	113	104	120	114	105	118	122	123	116	117	114	110	108	107	106	116	107
27.7	114	119	121	124	116	122	119	111	115	124	112	107	118	114	102	119	125	123	114	119	113	112	107	109	108	112	108
27.7	114	123	123	127	114	120	117	111	116	127	111	107	120	113	100	120	123	122	111	121	112	115	107	110	105	119	106
27.7	117	122	121	131	119	117	115	109	114	124	113	106	120	113	98	120	125	119	112	121	114	115	107	110	105	118	107
27.7	114	123	119	131	123	116	114	110	116	122	110	105	122	117	99	120	128	117	112	118	119	117	108	108	105	115	109
27.8	113	123	119	133	122	119	112	111	112	119	105	101	122	121	102	118	127	113	113	115	124	117	109	103	103	119	111
27.8	108	122	116	134	119	115	115	112	108	117	102	100	123	123	102	117	127	113	110	110	125	116	109	102	102	123	113
27.8	106	120	115	132	112	117	114	109	105	115	101	101	124	124	101	115	127	113	112	104	130	118	110	104	105	126	114
27.8	106	119	113	131	113	120	115	110	105	116	98	101	122	125	101	112	124	114	114	104	129	116	110	105	103	131	111
27.8	109	121	114	127	115	124	113	111	106	118	101	103	123	124	103	114	122	114	114	100	128	113	106	110	106	134	112
27.9	109	121	116	124	115	129	111	113	107	118	103	103	124	123	105	111	118	117	110	104	128	113	101	113	107	135	112
27.9	108	119	119	120	110	127	110	114	105	122	104	101	121	121	103	110	116	117	110	108	132	111	99	113	108	137	113
27.9	116	117	115	118	110	130	110	116	105	123	106	101	120	119	103	111	112	116	112	110	132	110	93	116	107	138	116
27.9	117	119	119	118	109	129	113	118	100	123	106	102	117	119	103	111	115	116	109	110	132	109	91	119	108	136	116
27.9	118	117	118	116	107	128	112	121	99	121	106	106	116	121	102	108	116	116	112	111	128	110	86	119	107	136	116
28	115	115	118	117	107	126	113	117	102	121	108	106	113	124	101	108	120	118	109	113	127	110	87	119	106	132	115
28	114	114	119	118	108	123	112	113	102	121	108	107	110	125	96	108	122	119	108	116	124	107	89	119	104	135	109
28	115	113	115	119	109	118	112	111	103	118	108	109	108	128	94	108	127	118	109	114	123	106	93	117	105	132	105
28	113	116	115	122	109	118	109	110	106	118	109	106	110	135	94	110	129	115	112	114	125	108	98	114	105	129	103
28	112	118	117	123	109	115	110	108	108	118	108	104	108	137	94	111	129	111	115	112	125	110	102	112	104	132	103
28.1	111	117	114	126	108	111	113	106	107	115	110	105	111	140	95	115	129	113	118	111	122	110	106	113	102	132	104
28.1	110	118	113	125	109	114	112	103	108	115	112	106	111	134	96	116	129	113	124	113	121	112	111	115	100	129	99
28.1	109	121	116	125	112	116	111	105	113	118	115	107	108	131	97	117	127	114	127	115	121	112	114	117	99	130	98
28.1	113	120	118	125	115	114	111	105	114	119	121	105	108	125	99	118	125	113	129	111	122	112	113	117	99	128	99
28.1	112	122	120	124	117	116	112	103	115	115	124	105	111	117	103	115	121	110	129	110	123	113	111	116	102	128	99
28.2	112	123	118	125	116	120	113	100	118	115	126	101	112	112	103	115	120	106	130	111	127	113	110	116	103	129	101
28.2	117	122	116	122	117	124	109	101	120	116	129	106	114	111	102	116	117	109	130	110	125	116	107	115	101	128	103
28.2	116	122	115	119	117	126	107	102	113	115	128	106	114	113	102	115	119	110	129	106	122	114	105	110	100	126	106
28.2	113	121	115	116	118	128	106	102	113	116	126	109	119	111	103	116	119	111	127	107	119	114	103	107	103	126	107
28.2	112	118	117	117	115	130	105	99	113	118	125	106	122	111	101	114	123	110	123	107	118	119	102	108	104	125	109
28.3	112	120	114	118	117	130	104	101	113	120	119	110	123	114	97	113	124	110	117	107	115	118	103	107	107	125	107
28.3	111	119	110	118	115	129	103	106	115	120	116	112	125	117	99	111	128	108	116	105	114	119	108	107	111	126	107
28.3	110	119	111	117	114	126	103	107	112	122	112	107	125	122	101	110	129	108	114	105	115	119	111	104	113	126	107
28.3	105	118	111	114	114	126	109	107	110	123	108	106	124	120	104	110	129	110	117	103	116	119	111	103	113	130	108
28.3	102	117	110	116	112	121	112	108	107	123	104	106	124	120	103	111	126	114	114	102	114	116	114	105	113	129	107
28.4	100	117	111	119	114	117	112	109	106	123	104	105	120	116	100	111	126	115	117	103	113	113	118	109	110	135	107
28.4	101	116	113	123	114	115	114	109	108	125	105	104	114	118	101	112	124	115	120	99	112	115	117	112	110	137	108
28.4	103	116	111	124	116	114	115	110	110	125	106	104	111	118	100	111	122	113	120	96	113	114	115	112	111	135	105
28.4	99	118	110	127	117	117	114	109	111	123	108	107	110	117	105	112	118	111	120	94	117	113	115	110	108	137	103
28.4	99	118	108	128	116	119	114	109	114	124	113	107	109	122	103	111	116	110	120	99	123	117	114	108	106	134	106
28.5	103	120	108	127	117	116	113	112	112	123	115	111	111	125	102	114	114	113	123	102	122	118	115	108	103	132	106
28.5	108	121	109	127	117	114	109	113	105	120	116	112	111	126	102	117	116	114	125	103	126	117	114	110	102	130	107
28.5	111	121	112	132	116	114	108	115	110	121	114	111	114	123	104	120	117	114	123	109	128	118	115	112	103	132	109
28.5	114	121	109	133	112	118	108	114	110	121	118	114	113	125	105	119	120	111	124	116	131	121	117	113	104	131	112
28.5	116	123	104	132	110	117	105	117	112	125	116	119	112	124	105	121	124	111	124	120	131	121	120	113	102	126	115
28.6	116	124	105	128	107	118	108	115	114	124	117	117	115	127	107	122	128	111	125	119	134	119	121	114	106	124	116
28.6	116	125	109	127	103	116	105	115	106	127	117	116	116	124	108	121	125	110	124	120	136	118	122	113	107	121	112
28.6	115	125	112	124	105	119	105	114	104	126	114	114	115	121	109	121	123	112	124	119	137	118	123	112	109	121	114
28.6	117	124	115	124	106	119	101	115	107	129	114	113	117	125	108	121	125	109	117	118	135	118	124	114	109	121	113
28.6	121	120	115	128	111	123	101	116	107	128	117	111	115	126	102	122	130	114	121	118	134	116	122	116	108	125	116
28.7	123	121	114	123	118	127	103	119	110	132	117	109	116	130	105	121	130	115	119	114	132	121	118	117	110	122	114
28.7	123	121	110	123	123	130	102	120	111	131	117	108	114	132	106	120	132	116	118	112	131	121	115	113	110	122	107
28.7	121	122	114	126	127	133	103	121	111	134	119	106	120	132	107	119	128	117	121	112	129	122	116	111	108	125	104
28.7	123	125	117	128	131	130	104	122	110	132	120	100	123	135	105	117	132	117	121	114	125	125	115	110	107	124	107
28.7	124	128	121	129	135	127	106	123	109	131	119	102	127	134	106	117	133	119	126	117	123	125	114	115	107	128	107
28.8	125	131	127	128	135	126	102	123	107	125	117	100	127	131	105	117	136	122	127	116	121	125	114	115	108	136	111
28.8	125	132	129	134	135	128	105	121	111	125	115	99	125	132	104	116	137	119	131	118	124	122	115	113	111	144	113
28.8	126	136	135	132	134	132	108	120	110	128	117	105	128	131	99	116	142	119	137	120	125	121	114	116	112	147	113
28.8	128	141	141	134	131	128	107	120	114	129	116	110	132	132	96	115	145	119	140	118	129	122	117	120	114	149	114
28.8	128	144	145	135	130	127	112	117	116	132	116	111	138	134	97	117	140	120	141	114	134	120	113	122	121	150	110
28.9	128	145	148	133	128	128	109	120	114	137	119	114	137	128	98	119	139	120	143	116	133	122	114	123	122	149	108
28.9	130	144	148	132	131	129	111	119	118	140	120	114	137	130	104	120	141	122	142	115	139	122	114	124	121	154	115
28.9	132	139	149	133	132	130	114	123	122	144	124	119	139	132	106	123	146	122	140	116	144	124	114	128	120	154	115
28.9	135	137	144	131	136	128	119	127	126	146	125	123	135	134	107	125	147	128	138	118	147	126	111	127	121	153	115
28.9	136	132	141	127	138	132	124	126	126	152	126	121	134	136	112	124	147	130	137	120	148	128	112	129	123	152	111
29	135	126	140	131	140	133	124	125	127	152	126	119	134	136	114	123	151	131	137	122	147	129	115	127	120	152	110
29	135	129	141	135	142	136	124	123	128	157	129	122	136	138	116	125	151	135	137	126	145	128	116	125	115	150	113
29	133	132	139	136	143	137	126	125	127	154	134	122	136	139	116	121	156	138	139	127	144	132	117	125	114	149	116
29	133	132	138	137	144	140	127	124	128	156	136	125	137	140	116	120	157	139	140	129	149	132	119	125	118	149	119
29	134	134	142	138	147	144	128	122	128	153	137	122	135	141	117	119	160	139	143	130	148	132	123	123	118	151	121
29.1	137	136	146	142	149	149	131	121	131	154	134	124	137	145	120	119	163	138	142	130	156	136	126	121	119	153	119
29.1	142	146	147	144	145	153	128	123	131	154	133	128	141	146	118	122	164	139	144	134	157	138	127	123	118	154	122
29.1	143	148	146	147	145	153	128	127	134	154	134	125	142	149	121	125	165	139	147	130	161	144	129	128	124	157	124
29.1	144	149	142	151	144	158	129	128	136	157	133	126	146	148	125	128	164	143	150	132	160	145	131	133	127	162	124
29.1	147	155	142	153	140	164	128	133	135	163	134	126	146	147	126	134	167	148	154	133	160	148	133	137	125	163	128
29.2	146	159	145	158	141	162	131	133	136	166	136	130	149	149	128	140	167	149	152	136	165	147	135	138	128	167	134
29.2	148	159	146	159	138	162	132	136	138	170	134	132	149	150	128	142	167	156	157	139	164	151	140	140	136	166	135
29.2	149	160	146	156	138	159	132	136	138	176	132	130	151	153	130	143	169	157	160	142	164	155	140	140	143	169	136
29.2	149	154	150	158	138	165	134	134	137	185	134	130	155	156	128	145	169	164	167	143	163	152	144	143	147	174	139
29.2	149	152	151	158	142	163	135	134	135	189	136	135	160	159	129	148	172	170	169	143	164	152	143	143	146	178	142
29.3	152	154	153	156	145	168	137	134	136	197	143	140	163	164	128	152	172	175	174	144	169	156	144	138	147	180	149
29.3	152	154	161	158	150	168	139	135	135	200	152	142	170	165	123	154	171	177	179	141	168	159	146	142	153	182	149
29.3	159	155	166	157	157	167	139	136	138	202	152	146	178	168	129	159	167	180	180	143	172	159	150	140	156	186	154
29.3	165	154	172	154	163	168	139	139	137	200	155	152	182	168	138	158	167	183	183	144	172	162	153	141	157	184	156
29.3	167	155	174	157	170	169	138	142	139	195	151	157	190	170	148	161	165	186	182	144	176	166	152	145	155	185	159
29.4	169	155	169	159	170	165	136	147	140	192	149	158	194	172	154	165	163	183	182	148	179	166	153	151	153	184	164
29.4	169	153	171	157	171	157	140	150	142	183	147	155	188	174	165	164	160	185	181	147	177	164	154	159	153	185	160
29.4	172	150	165	159	167	159	141	150	142	175	144	156	188	173	173	160	155	182	177	153	174	161	156	163	149	183	157
29.4	170	152	164	159	163	160	142	152	141	167	139	153	185	167	181	164	152	179	173	152	172	158	151	163	149	172	154
29.4	164	149	163	156	160	151	143	147	143	163	138	149	182	163	184	161	155	175	166	153	168	153	149	165	148	164	150
29.5	164	147	157	147	151	148	143	146	145	156	133	145	176	160	184	152	154	170	165	150	158	154	148	163	151	154	143
29.5	157	146	153	141	145	149	141	142	144	153	128	140	174	160	181	145	157	159	160	147	152	149	146	158	150	149	135
29.5	151	138	150	140	143	151	140	139	146	148	127	139	165	158	174	140	151	154	156	145	146	145	144	158	148	144	134
29.5	147	133	148	132	141	150	141	134	144	146	126	137	156	156	167	138	155	146	154	144	140	141	141	157	141	141	133
29.5	142	131	147	130	138	151	137	131	146	144	128	133	149	153	154	138	155	137	152	139	139	141	141	151	134	139	133
29.6	141	134	149	133	138	145	133	128	146	141	129	133	148	149	143	138	152	130	149	135	136	136	135	148	134	142	127
29.6	141	135	146	131	138	144	133	128	146	139	127	131	144	145	135	134	149	126	146	135	138	134	134	139	131	142	127
29.6	141	133	144	129	137	143	129	128	144	141	125	132	141	140	127	129	148	126	147	136	138	133	133	137	129	141	128
29.6	137	132	144	134	140	141	129	127	146	140	122	134	139	139	125	128	144	123	146	137	142	133	129	134	126	146	133
29.6	137	132	143	133	134	141	127	125	144	139	120	130	138	140	118	124	140	122	142	138	145	132	126	129	123	149	134
29.7	138	130	138	132	129	141	127	121	139	134	120	126	129	141	118	123	129	125	138	137	146	128	125	123	120	151	133
29.7	140	128	132	134	132	143	124	118	138	135	120	123	132	138	117	122	126	123	135	138	145	134	125	118	118	150	134
29.7	141	127	133	133	129	138	120	118	141	134	118	120	136	133	120	123	127	126	132	136	146	134	119	116	118	144	129
29.7	140	128	131	131	126	133	116	116	139	136	120	120	138	132	117	121	130	130	131	134	144	138	117	115	117	139	130
29.7	139	130	132	128	127	136	118	118	137	136	118	120	138	129	117	118	125	128	132	130	140	136	117	113	123	136	129
29.8	133	128	130	130	127	136	114	120	137	136	116	119	138	126	120	119	128	131	131	127	137	132	118	116	124	132	129
29.8	130	126	129	129	130	131	113	122	134	134	115	117	134	127	123	118	127	133	131	127	133	134	118	120	125	132	132
29.8	128	124	130	129	131	133	113	120	130	133	112	111	134	123	121	123	129	132	132	122	132	130	119	121	122	128	132
29.8	126	125	129	132	133	129	114	121	130	127	110	112	132	122	120	126	128	131	130	118	133	130	119	118	122	132	128
29.8	125	127	131	134	132	129	115	121	128	125	109	110	132	121	123	126	130	126	129	119	134	125	115	121	125	132	123
29.9	123	126	131	134	133	127	121	122	122	127	107	108	126	119	123	127	132	124	125	123	134	120	114	119	123	128	121
29.9	124	125	132	134	127	123	119	124	120	126	107	110	124	118	126	127	130	122	124	125	130	118	115	120	123	131	123
29.9	123	127	132	136	126	126	120	125	120	124	110	112	123	120	127	121	130	117	125	124	132	119	116	119	122	134	126
29.9	123	125	134	132	123	127	120	122	116	123	111	109	122	120	122	121	126	116	118	122	131	118	116	117	119	135	126
29.9	125	122	131	130	121	123	119	122	114	120	116	113	116	121	122	124	123	113	116	123	130	115	118	116	118	136	125
30	125	122	130	131	122	119	114	121	117	119	115	114	117	120	118	125	125	109	116	124	128	118	119	114	118	134	121
30	127	123	133	130	118	119	113	119	118	119	118	117	118	119	118	127	127	110	115	124	128	118	117	116	121	131	115
30	123	127	133	129	121	121	115	118	116	118	119	119	116	118	117	128	129	106	112	124	127	120	118	114	120	127	116
30	122	126	136	127	124	123	121	119	115	124	120	119	115	118	114	125	127	107	117	123	125	116	120	115	121	126	115
30	119	122	138	124	122	120	119	118	112	126	119	115	113	120	112	123	128	112	117	122	124	119	121	114	120	122	115
30.1	119	123	136	124	124	120	117	114	110	128	116	116	117	124	108	118	128	115	120	124	126	125	120	112	119	123	114
30.1	119	122	137	123	124	127	116	112	112	126	114	115	119	121	102	118	125	119	121	120	125	126	125	113	115	122	112
30.1	121	121	135	121	124	125	116	112	115	127	109	116	119	121	100	116	124	120	122	119	124	130	126	113	113	125	108
30.1	119	122	135	118	123	125	114	109	112	128	110	115	118	121	99	115	124	122	123	119	126	133	125	115	107	127	107
30.1	119	119	131	120	121	123	114	111	111	129	108	116	118	123	101	115	123	125	122	118	127	131	124	113	100	128	111
30.2	119	119	127	120	115	122	112	113	114	129	109	117	119	123	101	113	121	124	124	114	128	133	125	115	101	130	114
30.2	120	120	125	118	116	121	111	110	115	131	108	116	117	123	101	110	123	120	127	112	127	132	124	115	100	131	118
30.2	122	117	126	118	115	119	110	109	115	130	108	115	115	120	105	114	123	118	126	110	125	129	121	114	102	129	119
30.2	121	118	122	121	117	115	107	110	114	129	110	116	115	122	105	117	122	116	130	107	124	126	120	114	103	129	119
30.2	121	119	121	124	116	116	107	109	115	130	111	113	118	123	108	120	122	115	132	104	125	124	117	114	109	125	117
30.3	120	125	118	127	117	115	109	104	114	130	113	112	118	122	113	120	122	117	130	100	125	118	115	111	113	125	117
30.3	119	123	117	128	122	116	112	103	113	128	110	112	117	122	115	120	122	116	127	103	123	116	116	110	110	122	117
30.3	117	122	122	129	121	116	113	105	109	131	111	112	119	125	111	118	123	114	129	102	123	110	114	106	112	122	116
30.3	117	122	123	128	124	115	112	103	105	131	109	109	120	126	110	115	125	118	129	103	124	108	110	105	109	120	117
30.3	117	123	118	129	124	115	108	103	105	130	108	114	122	126	110	115	126	118	130	108	124	108	111	105	108	124	116
30.4	114	122	120	124	121	117	105	104	103	127	108	114	120	123	106	113	126	122	124	108	121	106	114	107	106	127	114
30.4	113	121	117	122	120	116	105	106	102	124	103	112	118	121	103	110	125	119	121	110	118	110	112	108	100	128	113
30.4	110	121	114	122	116	115	104	109	101	123	104	111	114	123	100	108	124	120	117	115	119	109	110	109	99	131	113
30.4	108	118	110	123	111	115	101	113	102	120	102	112	113	123	97	106	123	119	115	117	122	109	109	109	100	130	113
30.4	108	115	107	122	109	115	101	115	103	118	103	114	108	119	94	104	122	114	117	119	125	107	107	108	106	129	112
30.5	109	115	104	121	107	114	101	112	103	116	104	112	104	118	93	103	121	112	118	122	120	108	107	105	107	123	110
30.5	112	117	103	125	104	115	101	112	102	113	105	109	103	118	98	103	120	111	118	124	120	109	108	105	107	122	108
30.5	114	115	103	123	104	111	100	114	98	111	112	107	104	120	101	103	119	109	119	124	118	110	109	104	106	121	105
30.5	116	113	106	122	103	112	102	114	98	110	112	105	103	118	104	105	122	108	121	125	118	109	108	105	108	118	103
30.5	114	114	104	121	107	109	103	112	100	106	112	104	102	115	104	108	124	109	116	124	119	104	108	103	107	118	107
30.6	114	113	107	121	112	113	101	110	101	107	113	108	102	117	104	109	123	107	118	120	119	106	107	104	103	116	106
30.6	114	113	112	118	115	118	101	107	102	108	112	108	103	116	106	111	126	105	118	113	119	106	103	100	104	117	107
30.6	113	111	109	113	118	120	103	103	100	111	110	109	105	114	109	111	125	109	117	113	115	109	104	100	102	118	107
30.6	108	109	109	115	117	120	101	105	100	111	111	107	101	114	107	112	127	110	113	110	111	111	108	103	101	119	106
30.6	108	110	114	113	117	122	102	103	99	113	108	105	101	115	104	111	129	112	109	105	110	110	106	104	99	120	106
30.7	110	112	114	115	116	124	102	106	100	117	105	102	99	116	102	113	125	110	108	104	109	114	106	108	99	119	106
30.7	111	112	112	116	115	125	105	107	101	122	107	100	102	116	96	113	124	113	104	104	110	113	105	111	101	121	103
30.7	110	112	111	116	114	126	107	111	101	124	105	101	107	114	94	111	127	117	104	105	117	114	106	109	105	126	105
30.7	109	112	108	118	115	131	110	113	100	128	105	99	106	114	94	111	130	119	110	106	117	112	106	106	110	130	104
30.7	107	118	108	121	112	133	110	113	97	129	104	97	114	118	96	111	131	120	111	108	116	115	106	106	111	131	102
30.8	112	123	113	127	111	132	112	116	95	130	104	96	120	121	100	108	133	120	114	109	122	116	106	106	110	137	100
30.8	114	125	119	130	109	134	112	121	93	131	108	97	126	126	102	112	137	118	119	108	123	114	108	105	107	140	99
30.8	112	127	123	132	111	137	113	124	98	133	103	99	130	129	99	119	144	117	122	111	128	114	109	109	107	139	102
30.8	111	135	128	139	115	137	113	124	103	136	105	101	134	134	96	124	151	122	126	110	133	113	103	109	108	139	109
30.8	114	139	134	141	120	147	109	125	107	142	107	106	136	140	98	124	151	126	133	108	138	119	102	108	107	143	109
30.9	121	142	142	143	127	148	113	126	115	146	110	108	141	145	103	126	151	133	136	109	142	123	104	107	109	146	115
30.9	123	145	146	147	133	149	115	125	120	150	113	109	145	146	102	129	152	139	138	111	146	128	110	110	110	148	118
30.9	127	147	153	153	142	150	117	130	127	150	120	111	146	148	103	132	153	143	141	114	151	135	114	117	109	144	122
30.9	137	148	156	153	147	148	124	132	131	154	123	117	147	150	107	134	152	148	141	118	154	140	119	121	112	142	125
30.9	144	150	154	150	150	147	130	136	135	156	128	118	146	145	111	136	149	144	141	122	158	143	122	128	112	139	129
31	150	149	153	145	154	145	140	135	142	154	134	119	145	143	116	134	147	148	141	127	154	144	125	132	116	136	131
31	149	146	151	137	156	144	142	137	144	148	132	119	141	137	121	136	145	148	143	132	151	148	127	131	122	136	136
31	145	142	142	132	157	146	144	134	144	142	132	117	139	136	128	134	137	143	142	132	145	147	129	131	128	134	141
31	139	137	139	130	150	140	142	133	141	132	131	118	140	134	135	129	131	137	141	133	139	144	132	132	131	130	142
31	137	133	135	126	143	134	139	129	137	126	128	119	138	132	134	124	125	129	136	134	132	140	134	128	129	123	141
31.1	127	127	129	123	134	130	133	123	133	117	123	116	131	128	133	121	120	123	129	133	125	133	131	126	125	118	141
31.1	117	120	122	119	124	126	127	114	129	112	117	112	126	125	126	118	118	115	123	133	119	124	126	125	126	114	136
31.1	108	119	120	114	118	120	120	106	122	109	115	107	121	123	119	112	118	112	117	131	115	118	120	118	121	114	134
31.1	105	117	120	111	112	117	114	106	114	106	111	104	117	119	116	107	112	110	113	128	111	113	118	110	118	114	129
31.1	103	116	119	111	108	111	111	103	111	107	107	98	113	119	110	107	108	112	109	122	113	107	116	106	115	112	128
31.2	100	116	118	113	108	111	105	102	104	108	106	96	106	113	100	107	111	111	108	118	112	102	108	100	110	111	123
31.2	99	115	118	112	107	110	100	106	99	108	104	97	104	114	98	103	111	114	108	112	115	103	106	97	107	105	119
31.2	104	118	117	112	100	112	102	106	94	108	103	100	100	115	96	101	115	112	106	108	115	101	101	95	107	104	111
31.2	106	119	118	111	100	113	101	109	93	111	103	97	99	112	95	101	112	107	107	104	118	99	97	93	105	101	106
31.2	108	119	119	111	102	116	103	109	98	109	103	95	98	108	94	102	113	112	110	100	112	100	92	90	107	100	102
31.3	107	116	117	108	105	118	102	109	99	108	102	94	98	108	92	103	109	111	111	97	111	100	90	86	105	103	102
31.3	108	115	112	109	103	120	102	111	101	107	102	94	103	110	99	101	108	110	109	93	111	100	90	85	108	103	103
31.3	106	111	112	109	100	118	102	110	100	109	100	96	106	111	97	99	107	109	107	95	111	101	90	85	107	99	99
31.3	107	112	109	108	100	118	100	106	103	110	100	96	107	113	98	99	106	108	102	98	109	103	91	87	109	97	99
31.3	104	107	108	109	98	118	104	102	103	107	102	95	108	109	100	96	103	107	103	97	109	104	89	89	111	104	98
31.4	103	107	104	107	96	119	104	99	104	105	105	94	113	107	99	96	105	102	102	101	109	102	90	90	113	108	93
31.4	100	107	103	104	97	116	104	100	99	106	107	93	115	105	99	94	104	103	99	103	107	103	95	92	115	106	91
31.4	103	105	103	108	96	115	103	103	99	105	102	90	114	103	102	98	102	105	98	104	108	104	95	95	115	105	93
31.4	101	106	101	107	98	112	103	101	96	109	100	88	110	104	100	97	105	106	99	104	107	100	94	99	112	106	91
31.4	99	109	99	107	97	113	101	100	92	108	102	88	108	107	97	96	106	103	102	101	105	98	91	101	111	103	93
31.5	98	107	98	104	97	112	98	100	89	104	100	87	108	109	98	95	101	104	102	100	108	101	92	104	111	101	90
31.5	98	110	101	105	98	115	97	101	90	105	100	84	107	112	96	95	102	99	101	103	107	99	92	106	111	102	90
31.5	93	107	103	103	106	111	97	103	91	106	100	83	107	107	94	94	100	98	102	103	107	98	91	106	108	102	90
31.5	96	106	98	100	108	110	94	102	94	106	99	82	106	104	95	95	102	98	103	101	107	97	88	105	104	102	90
31.5	96	106	98	96	112	108	94	101	94	109	97	87	104	104	94	95	103	97	104	101	107	95	89	102	97	100	90
31.6	99	104	96	96	113	108	92	100	94	109	93	88	101	105	93	96	103	101	105	100	105	98	89	104	95	100	89
31.6	101	100	96	95	116	107	93	98	98	110	88	92	98	109	90	95	103	102	107	98	105	97	88	103	89	97	89
31.6	102	97	95	96	115	106	93	95	99	106	90	95	94	110	92	96	108	103	113	95	106	98	87	100	91	102	89
31.6	102	92	94	99	115	106	96	95	96	104	92	95	94	108	92	98	110	101	118	96	105	99	89	98	89	104	86
31.6	101	93	90	99	113	110	95	93	95	102	91	95	96	106	95	99	114	100	116	98	104	97	91	97	89	104	86
31.7	99	91	90	100	113	112	96	90	93	101	89	94	96	110	96	96	114	103	116	97	104	97	93	96	89	104	88
31.7	99	90	90	104	108	111	97	89	94	100	86	94	96	107	97	98	117	103	117	98	102	97	91	96	89	102	94
31.7	96	93	92	104	100	110	99	87	90	101	87	95	93	108	98	99	117	99	116	97	100	96	90	98	89	103	93
31.7	97	93	91	106	98	111	102	90	87	99	90	95	95	108	95	101	114	98	111	97	101	99	92	96	90	104	97
31.7	99	97	95	109	96	113	103	93	88	99	96	92	95	109	93	102	111	98	110	99	100	100	92	96	92	103	96
31.8	98	101	97	110	95	117	103	93	91	101	101	91	100	108	93	99	108	97	108	99	102	101	93	95	93	104	99
31.8	98	101	100	111	96	117	103	95	94	101	106	95	101	102	94	97	106	97	103	96	105	99	91	97	92	100	97
31.8	102	105	97	111	93	120	98	100	97	105	110	96	103	100	95	99	104	98	103	95	108	96	91	98	93	96	99
31.8	103	109	102	110	99	120	98	102	101	107	111	100	103	98	92	98	105	99	102	95	107	97	91	98	87	95	101
31.8	108	108	104	110	100	119	94	101	105	108	112	101	101	102	89	96	105	101	103	89	104	100	89	100	85	98	100
31.9	108	110	104	110	103	121	92	99	107	107	108	101	101	104	88	95	107	102	105	84	104	99	90	96	86	99	99
31.9	108	110	106	112	103	118	93	96	103	104	109	99	99	103	83	97	109	101	105	83	104	102	87	96	84	102	99
31.9	103	108	104	108	109	118	90	95	101	106	107	94	99	105	84	97	110	101	104	85	105	104	91	98	84	104	96
31.9	103	109	102	103	106	118	89	93	99	104	100	89	100	104	85	94	113	103	102	85	106	101	94	97	85	107	97
31.9	101	108	107	100	108	113	90	92	96	104	93	85	99	109	84	94	112	104	103	84	108	104	95	93	85	107	97
32	99	105	107	99	105	111	88	95	93	102	90	81	97	108	85	95	114	102	101	84	106	105	96	89	87	108	98
32	99	106	107	96	102	107	91	95	91	103	87	79	94	109	85	96	113	100	98	85	105	111	97	85	88	113	96
32	100	105	103	96	102	103	93	95	87	104	88	78	94	109	84	96	112	102	99	89	105	114	96	81	84	117	95
32	100	106	105	96	101	100	96	95	86	104	92	76	94	110	87	94	112	100	97	91	104	113	93	83	88	112	95
32	97	102	104	96	101	98	94	95	88	104	91	76	99	109	91	93	110	100	94	92	108	112	94	81	88	112	97
32.1	93	104	105	96	102	96	95	97	90	107	95	80	95	107	95	95	108	101	92	95	108	108	93	83	86	108	93
32.1	93	103	103	97	102	95	94	100	94	110	95	80	97	105	97	94	107	99	93	96	109	104	92	83	85	108	95
32.1	94	104	107	97	104	95	95	99	99	111	94	84	94	104	98	93	107	98	91	94	105	104	91	84	83	107	95
32.1	92	103	109	100	100	96	96	96	102	111	95	86	93	103	100	93	106	98	92	92	99	104	89	85	85	106	95
32.1	91	105	110	102	98	101	100	93	100	109	93	88	96	99	98	96	108	99	93	90	96	104	91	86	86	107	94
32.2	95	106	109	104	100	100	103	90	101	107	94	92	96	96	96	98	107	96	94	88	96	104	89	91	85	103	91
32.2	94	105	110	104	99	103	100	90	100	110	95	90	98	94	99	96	107	97	95	86	96	105	91	95	84	103	89
32.2	98	107	110	103	94	100	102	89	100	108	92	90	100	96	96	96	105	97	98	84	93	103	93	93	84	99	87
32.2	99	107	111	105	93	97	102	91	97	107	93	87	101	98	92	96	101	95	100	81	92	102	93	93	85	95	89
32.2	102	104	109	104	91	98	101	91	96	105	92	88	100	98	90	97	101	95	100	82	89	101	91	92	87	96	89
32.3	103	105	106	101	88	98	104	92	96	106	91	88	101	97	89	97	102	96	101	87	87	100	88	91	90	94	90
32.3	102	102	104	101	86	95	102	93	92	103	90	89	102	96	86	96	103	98	105	88	85	99	88	94	90	97	92
32.3	104	99	103	99	88	93	102	96	90	101	93	89	102	97	87	96	105	96	102	91	87	97	88	94	90	94	96
32.3	101	98	101	97	93	93	94	93	91	101	92	89	101	100	88	98	105	95	102	93	89	98	88	92	90	96	96
32.3	100	96	101	97	95	90	91	89	92	104	96	93	96	105	88	99	104	95	102	95	90	95	89	92	88	97	97
32.4	100	92	101	97	92	92	90	92	96	107	92	90	97	104	87	100	106	92	101	93	90	94	90	90	90	101	99
32.4	100	92	103	98	93	95	86	91	98	108	91	93	93	105	85	103	108	94	96	92	89	94	90	91	94	100	98
32.4	98	89	101	98	90	97	84	90	96	107	94	95	93	104	86	101	109	90	95	89	91	96	90	91	95	103	96
32.4	99	90	99	97	92	99	82	92	92	105	93	95	95	99	84	103	110	94	92	89	94	96	94	88	95	104	95
32.4	101	89	95	98	95	100	79	91	95	104	94	94	99	95	84	103	106	95	93	86	96	97	94	89	91	103	91
32.5	99	89	98	99	96	101	77	91	95	103	96	94	100	90	84	101	101	100	91	89	100	98	95	90	89	103	89
32.5	99	92	97	98	96	99	81	93	94	102	96	94	101	92	83	103	100	101	93	88	103	99	95	89	88	99	88
32.5	98	96	97	98	95	99	85	95	90	99	97	92	99	93	86	103	100	106	94	88	105	97	94	93	89	96	90
32.5	99	97	99	97	96	104	88	97	90	99	96	91	99	96	85	104	103	110	97	93	103	98	94	94	91	96	88
32.5	94	101	97	98	95	108	92	98	90	99	98	92	101	94	85	101	107	110	98	95	101	94	94	95	91	95	89
32.6	89	105	95	96	93	107	94	97	90	95	99	92	102	92	85	99	109	111	101	93	104	96	94	93	91	96	90
32.6	89	107	94	95	95	110	91	93	91	93	104	89	99	94	86	98	109	108	100	95	106	97	92	90	91	94	90
32.6	86	109	91	96	97	107	88	85	92	96	103	86	95	94	86	94	108	106	100	95	106	95	90	92	92	95	89
32.6	87	107	92	100	94	103	86	87	93	100	107	87	92	97	88	94	110	102	100	93	105	93	92	94	91	96	90
32.6	86	105	93	101	90	105	82	91	95	104	104	85	89	97	86	93	112	99	100	92	102	93	91	92	95	99	91
32.7	88	104	93	107	93	102	78	91	96	108	106	84	85	97	84	91	116	96	96	90	104	93	92	92	96	98	92
32.7	91	99	90	105	92	100	74	92	93	109	105	83	87	96	84	87	117	94	96	90	104	92	90	89	97	101	90
32.7	89	98	91	108	92	97	74	95	92	108	101	81	87	93	82	90	111	97	96	90	100	92	92	87	95	103	91
32.7	91	94	92	112	92	97	73	95	95	112	98	81	89	88	80	89	109	94	95	87	99	91	91	90	92	101	90
32.7	92	92	96	113	93	99	75	94	92	113	96	84	90	88	78	91	106	97	92	90	101	91	91	92	91	103	88
32.8	95	94	97	111	94	99	82	94	89	115	94	87	91	93	80	93	108	99	94	87	100	92	91	92	86	104	90
32.8	99	96	98	111	94	101	86	93	86	113	93	88	91	96	84	95	107	104	96	86	98	90	90	93	83	106	89
32.8	98	96	100	110	97	105	90	91	89	117	93	91	98	98	86	96	108	105	97	87	98	93	90	90	82	108	86
32.8	97	100	97	108	97	109	93	89	92	118	96	95	103	96	90	96	107	108	99	86	101	90	89	87	79	108	89
32.8	96	105	98	104	96	113	95	86	94	113	96	92	105	97	94	98	105	110	102	85	108	91	86	89	81	110	86
32.9	98	106	99	106	97	116	93	83	96	113	99	91	103	98	97	98	107	108	102	87	106	87	83	95	85	113	88
32.9	101	110	95	104	96	115	96	86	100	115	97	92	103	100	99	97	106	106	103	86	110	84	82	99	85	115	89
32.9	102	113	97	104	95	116	94	91	103	116	99	91	103	105	102	98	108	106	106	85	112	85	85	101	84	115	90
32.9	100	113	98	105	96	118	92	93	108	117	102	89	104	105	102	98	112	105	109	89	112	87	87	102	85	118	94
32.9	104	119	102	111	101	116	94	97	111	124	106	88	102	107	102	98	117	107	107	90	115	89	89	104	86	122	95
33	106	118	103	110	102	116	94	100	111	130	107	89	105	112	101	97	123	110	111	92	116	91	86	105	90	128	94
33	107	120	109	115	105	120	95	103	111	135	107	91	106	112	98	101	128	108	113	89	115	94	90	106	92	135	96
33	115	122	113	116	109	121	96	102	110	143	107	95	110	116	94	104	133	108	114	94	119	98	96	106	93	138	100
33	122	127	120	120	115	125	99	103	109	148	112	99	116	128	91	113	141	115	115	96	122	101	99	108	95	147	98
33	130	131	122	128	122	130	103	105	106	154	114	105	119	136	93	112	154	119	121	98	127	105	102	109	94	157	99
33.1	133	137	127	136	130	135	105	110	109	159	118	110	124	141	95	118	160	125	132	100	134	110	111	112	97	166	101
33.1	139	145	136	143	138	145	114	115	112	170	124	115	130	148	99	123	165	129	141	106	144	116	116	107	100	170	105
33.1	146	158	142	150	146	154	119	124	111	172	130	121	136	153	102	125	170	135	152	109	153	122	124	115	104	175	114
33.1	153	167	150	155	152	159	127	130	119	172	135	124	145	164	106	133	175	139	156	115	161	131	126	122	113	178	120
33.1	160	173	154	164	158	164	131	136	128	173	137	130	151	171	109	137	177	146	163	121	164	138	132	127	119	177	128
33.2	165	177	156	167	161	164	139	145	138	169	144	137	156	173	117	141	175	150	170	126	169	147	136	131	123	173	135
33.2	165	174	162	171	162	163	146	150	146	163	150	139	160	170	123	143	173	155	173	133	167	155	140	136	125	165	142
33.2	163	166	159	172	162	159	150	156	153	156	155	142	165	166	133	144	169	159	172	140	165	159	144	139	129	161	150
33.2	161	162	161	171	160	153	157	158	158	153	155	144	163	162	141	141	163	159	168	143	161	165	145	141	133	153	152
33.2	155	148	153	163	153	149	158	159	160	144	154	144	159	152	144	137	156	157	162	141	154	162	145	145	137	148	154
33.3	148	137	151	153	151	143	156	154	159	135	146	147	152	146	147	135	146	149	158	140	148	158	144	144	138	141	153
33.3	144	129	143	141	144	134	152	148	157	126	141	143	145	139	150	132	139	143	149	141	138	153	140	145	137	132	152
33.3	136	119	134	132	134	128	148	143	152	119	136	137	138	134	149	127	134	138	138	136	130	145	136	146	137	127	141
33.3	125	109	125	123	126	122	139	139	140	111	126	133	127	124	146	117	127	131	132	131	120	137	129	142	132	123	133
33.3	112	104	119	112	119	115	131	133	133	107	117	127	115	115	140	115	116	121	128	124	114	130	121	136	129	119	128
33.4	104	101	116	108	112	113	123	128	124	104	109	119	106	110	134	107	105	114	120	118	111	119	112	125	124	116	119
33.4	98	104	108	102	107	107	114	120	112	100	103	112	103	107	124	99	101	109	113	107	106	112	104	123	118	112	114
33.4	93	102	104	100	103	100	104	113	109	98	96	107	99	108	113	96	96	107	105	101	103	109	94	116	113	107	106
33.4	91	102	101	99	96	100	97	107	104	95	89	101	95	104	106	91	90	107	102	95	102	104	92	110	104	102	100
33.4	88	99	97	99	90	95	94	102	100	93	91	98	91	99	101	88	90	102	102	94	99	99	87	105	99	100	98
33.5	87	97	94	97	87	94	91	99	96	92	90	94	90	93	94	86	91	102	101	90	96	96	82	97	93	98	94
33.5	86	94	87	95	85	92	87	96	90	90	86	89	90	93	91	83	95	103	98	89	95	94	82	94	89	98	94
33.5	85	91	89	93	85	94	86	92	86	91	83	86	86	88	86	81	98	96	96	86	94	91	84	90	87	96	89
33.5	84	87	87	90	86	94	81	86	84	91	81	81	84	86	82	82	97	94	92	82	94	84	82	88	85	99	89
33.5	83	85	91	89	91	95	78	82	84	91	80	80	80	89	83	83	99	90	92	83	92	85	83	85	81	101	87
33.6	86	85	91	84	90	96	78	78	84	91	82	77	82	85	81	83	102	87	86	86	90	84	86	85	79	102	86
33.6	83	83	91	84	86	93	77	76	84	92	79	77	82	86	78	84	101	85	83	85	89	86	87	82	76	101	82
33.6	80	84	93	83	87	89	78	78	84	93	77	76	82	86	77	84	101	84	81	81	83	84	84	81	77	99	82
33.6	79	87	95	83	86	87	75	78	86	94	74	76	83	89	79	84	99	79	78	79	84	86	82	80	78	99	80
33.6	78	87	95	87	86	87	75	79	89	93	73	77	82	93	78	81	94	77	74	80	83	83	81	82	76	97	78
33.7	79	91	92	85	84	85	79	81	87	90	74	80	86	94	78	80	93	74	73	78	81	81	80	83	76	93	78
33.7	79	90	90	88	84	85	80	81	90	89	71	82	81	95	77	80	90	73	74	78	79	81	82	87	77	88	76
33.7	80	90	87	82	80	85	83	82	91	87	70	80	80	94	78	79	89	71	75	79	78	80	82	85	75	84	79
33.7	79	90	84	85	80	85	83	83	89	85	75	82	81	91	78	80	90	69	80	79	78	79	81	85	77	85	79
33.7	82	89	82	79	82	80	82	88	87	85	76	81	79	88	78	79	90	72	85	75	80	82	78	83	76	87	80
33.8	86	87	82	80	80	76	83	87	85	83	74	80	79	85	78	79	92	73	88	74	81	82	74	83	75	89	81
33.8	85	86	82	80	83	77	82	85	83	85	74	79	78	84	76	78	88	72	91	71	85	81	72	81	76	90	79
33.8	83	86	79	80	83	79	79	82	84	83	75	77	80	84	75	80	85	75	92	69	88	83	70	79	75	90	79
33.8	81	84	81	82	84	80	80	81	85	84	76	77	81	80	75	82	86	76	92	69	90	85	72	77	75	91	79
33.8	81	82	80	83	82	79	78	80	84	86	75	74	85	78	74	83	90	75	92	70	90	86	72	73	77	90	77
33.9	81	83	81	87	78	77	76	80	84	87	74	77	88	75	73	83	93	78	91	68	89	88	71	72	76	88	77
33.9	78	85	81	86	78	73	75	79	86	86	75	75	86	74	71	81	96	78	90	69	90	88	73	73	77	85	74
33.9	77	87	81	86	79	72	74	80	85	86	78	75	87	77	72	79	93	78	86	71	90	91	73	77	74	85	72
33.9	77	86	79	86	81	76	76	79	85	84	81	75	85	79	71	77	93	75	84	74	88	89	74	79	72	84	71
33.9	77	85	79	85	82	77	82	81	85	82	81	76	82	78	72	73	93	75	82	76	83	87	76	78	71	81	68
34	80	84	76	87	85	80	82	78	85	84	80	75	75	78	72	73	93	76	79	77	78	84	76	79	72	79	70
34	81	84	77	85	88	80	78	79	80	83	83	74	78	78	70	73	91	75	78	77	75	83	76	79	71	80	74
34	83	83	78	86	89	81	78	81	76	84	84	76	80	80	70	73	89	73	76	78	73	82	76	80	73	83	76
34	85	87	79	84	89	82	75	82	72	86	84	75	77	81	70	71	86	76	76	79	73	82	74	80	73	84	78
34	85	91	78	85	87	83	75	79	71	87	83	74	76	83	68	71	85	75	77	78	72	81	72	84	73	85	79
34.1	83	93	77	86	89	88	75	82	69	90	79	74	76	87	68	72	81	78	77	77	70	79	74	82	73	84	80
34.1	82	93	75	86	87	89	73	78	69	90	76	72	77	86	70	75	77	81	79	74	71	78	71	81	73	82	82
34.1	80	90	77	86	84	87	73	76	71	94	75	68	80	86	71	77	78	84	79	73	72	76	69	79	73	82	83
34.1	77	90	77	86	82	87	70	76	72	94	74	63	79	86	71	80	79	84	82	74	74	77	68	79	74	84	81
34.1	76	87	78	87	82	87	68	75	74	93	70	64	79	85	68	80	82	87	82	76	78	78	68	80	73	84	83
34.2	73	87	78	86	81	83	69	74	77	90	71	60	78	87	68	81	84	85	83	76	81	81	68	79	71	86	80
34.2	73	86	77	87	83	81	71	75	77	90	72	58	80	87	69	80	84	89	81	75	85	83	68	80	72	86	80
34.2	72	81	77	86	82	82	73	75	79	86	70	57	80	88	68	77	86	85	81	75	87	80	68	78	71	87	80
34.2	73	79	78	86	84	79	76	74	81	83	68	60	80	86	68	77	87	85	78	76	85	79	67	77	70	85	76
34.2	75	78	76	90	85	78	76	76	78	78	66	63	81	86	68	76	87	82	76	76	87	78	65	75	73	86	76
34.3	76	77	78	87	84	78	77	76	77	77	68	67	85	86	70	77	86	81	75	76	88	79	66	75	75	87	73
34.3	79	75	80	87	84	78	78	76	74	77	73	69	84	85	68	76	85	79	73	78	89	78	68	74	77	90	73
34.3	81	76	80	86	84	82	75	74	71	77	75	70	85	83	69	74	86	77	73	80	89	77	73	75	76	88	71
34.3	82	78	83	88	84	81	75	77	70	78	77	72	83	84	67	73	84	76	75	78	88	78	74	72	75	84	69
34.3	82	76	85	90	85	83	76	75	69	82	78	73	80	80	69	72	80	79	74	76	84	78	76	69	74	82	68
34.4	82	74	86	88	83	80	76	72	70	83	79	75	80	78	71	70	78	81	78	74	84	77	72	70	72	81	69
34.4	80	69	86	86	82	83	78	73	73	86	83	72	80	80	71	70	78	83	78	75	84	77	73	70	69	82	69
34.4	77	70	84	86	85	83	75	73	76	86	83	69	78	80	69	72	76	84	78	75	84	80	74	72	71	82	68
34.4	75	69	84	86	86	84	75	71	77	85	82	70	79	82	68	71	79	82	78	74	82	81	74	72	69	84	69
34.4	75	71	83	84	85	82	78	73	77	85	86	70	77	80	72	71	80	80	78	71	81	85	72	75	70	83	70
34.5	76	74	80	85	84	81	78	74	79	85	85	69	79	82	70	68	80	81	77	69	82	87	70	74	71	81	72
34.5	74	77	82	87	80	83	78	73	80	82	80	71	80	83	70	71	83	74	79	66	80	87	66	76	69	81	72
34.5	77	81	81	89	80	84	75	72	82	82	75	74	81	81	69	72	86	73	76	65	79	88	65	76	70	82	71
34.5	79	84	82	90	78	84	77	72	81	82	71	74	81	81	70	74	86	71	76	66	82	90	64	76	72	84	71
34.5	79	84	84	90	75	87	77	71	80	82	72	73	80	80	71	76	88	71	79	69	83	90	65	78	74	86	72
34.6	81	84	85	91	73	88	75	73	77	80	74	71	82	77	72	75	89	70	80	71	87	87	66	78	75	87	73
34.6	82	85	87	93	70	89	73	72	77	82	73	73	85	78	73	74	90	70	80	74	89	87	67	77	73	83	71
34.6	81	84	89	96	68	88	74	71	75	84	74	72	82	76	74	73	88	72	80	74	89	87	64	75	73	81	70
34.6	80	82	88	93	67	88	75	70	73	89	73	73	81	75	75	72	87	78	80	77	87	87	67	75	73	83	73
34.6	80	79	85	92	66	89	74	72	74	91	74	73	82	75	74	70	83	80	83	80	87	85	69	75	72	83	75
34.7	78	78	83	90	68	89	75	74	75	93	76	72	83	76	72	71	80	85	81	80	84	82	70	74	71	82	73
34.7	75	78	83	90	70	85	73	75	77	91	79	71	84	76	69	72	80	85	78	78	81	82	71	73	74	83	72
34.7	74	77	82	89	66	84	75	75	75	91	79	72	84	78	68	71	83	86	78	79	78	81	73	72	72	84	73
34.7	73	81	78	86	69	84	77	76	76	92	80	72	81	78	66	70	83	88	79	77	79	82	73	71	72	81	74
34.7	75	85	79	86	71	86	79	75	79	90	79	72	80	80	60	69	84	90	80	73	80	84	75	65	70	83	73
34.8	77	86	81	84	73	87	78	75	81	87	77	75	80	78	59	71	86	87	80	71	80	83	77	65	70	83	71
34.8	78	87	81	83	75	89	77	75	82	89	72	76	80	78	58	68	87	88	77	71	83	79	78	65	70	84	70
34.8	78	86	81	83	79	89	78	74	84	87	72	76	79	81	58	69	87	87	77	69	85	80	77	64	71	84	69
34.8	77	86	85	80	78	91	77	79	82	83	73	76	80	80	59	66	86	84	80	70	87	78	77	65	72	88	70
34.8	79	87	86	84	79	90	76	80	82	83	73	75	83	79	64	66	86	83	79	68	92	79	76	66	68	89	69
34.9	77	85	89	87	81	92	76	76	81	85	74	75	86	82	67	67	85	80	79	69	94	78	74	69	68	90	69
34.9	77	83	91	88	82	96	75	74	79	87	77	73	85	81	70	69	83	78	80	68	92	77	73	73	69	92	70
34.9	78	83	92	88	82	98	74	75	77	91	77	75	85	85	69	73	87	80	81	69	93	77	72	77	70	95	71
34.9	79	83	91	95	82	100	73	76	77	92	79	75	88	85	73	76	89	80	80	70	92	76	73	78	72	96	73
34.9	78	83	90	98	82	101	75	77	77	93	79	75	92	88	75	82	96	84	81	67	91	78	70	79	73	96	72
35	81	83	91	101	83	105	75	78	76	96	85	78	93	91	76	85	106	82	82	69	93	81	72	78	76	101	77
35	84	88	89	104	82	107	77	79	76	100	85	79	94	95	75	89	111	88	85	68	97	83	72	81	78	103	80
35	87	97	89	108	88	112	81	79	78	105	88	80	94	95	76	89	114	92	91	70	102	87	77	80	78	106	82
35	93	105	93	112	91	119	89	83	84	115	89	81	94	97	76	95	122	97	95	73	107	90	81	79	77	113	84
35	98	110	97	118	99	124	92	88	91	126	90	87	99	103	78	100	131	100	99	79	114	92	85	82	79	122	86
35.1	104	117	102	127	103	131	96	92	97	142	94	89	100	109	78	102	143	105	108	87	119	93	88	81	79	129	86
35.1	109	128	109	134	110	138	100	99	102	153	100	91	106	115	80	103	150	111	117	92	126	99	94	84	84	143	90
35.1	117	141	120	144	117	147	102	111	105	162	105	94	118	120	81	108	155	119	130	101	135	101	98	90	91	157	94
35.1	126	149	132	157	125	153	104	115	111	175	112	93	131	127	86	115	164	128	141	104	146	108	103	101	93	168	98
35.1	135	156	143	163	134	163	107	122	115	184	117	98	144	137	89	121	169	133	147	110	157	115	107	114	101	175	107
35.2	147	162	155	169	141	167	111	129	124	188	123	107	156	148	91	130	173	143	156	116	165	125	116	126	108	180	114
35.2	153	167	165	169	147	166	121	141	131	187	132	117	168	158	96	137	179	155	163	124	173	137	122	138	116	180	121
35.2	163	170	168	171	150	166	129	149	142	182	139	120	180	167	108	146	179	161	168	133	174	148	133	149	122	180	127
35.2	167	167	170	164	156	163	136	155	151	174	145	131	187	170	115	150	175	164	172	139	174	159	139	159	132	173	136
35.2	170	164	170	159	158	157	142	162	154	161	152	139	185	172	128	152	165	161	173	145	172	166	149	166	141	166	146
35.3	167	161	164	155	155	146	149	166	158	145	155	144	182	167	135	151	152	160	166	147	169	170	152	172	146	155	152
35.3	161	155	159	149	152	140	154	165	160	135	155	150	173	162	146	151	142	156	162	152	158	170	159	173	148	145	157
35.3	153	145	149	141	146	131	156	163	163	127	151	153	162	154	149	149	136	147	151	152	147	166	163	170	146	136	156
35.3	139	135	135	133	139	123	153	155	159	117	148	155	149	146	151	143	130	138	139	151	136	158	160	165	146	128	153
35.3	131	126	126	127	126	117	145	149	150	113	143	152	131	133	145	136	123	126	130	148	119	145	152	152	140	117	146
35.4	118	121	118	119	117	110	135	138	137	103	136	145	118	124	142	127	114	119	120	143	113	134	142	143	139	113	139
35.4	108	112	112	116	110	102	122	131	126	100	126	134	106	116	132	121	107	112	114	134	108	122	129	134	132	111	128
35.4	103	105	106	108	101	97	110	119	115	102	117	125	98	110	122	113	103	103	101	121	102	108	117	126	118	107	120
35.4	96	99	101	104	95	96	97	112	104	103	106	116	90	106	109	105	101	96	94	112	101	101	106	112	111	102	113
35.4	96	93	99	97	91	88	90	102	97	100	98	109	85	104	96	99	97	94	90	102	101	92	98	103	103	102	101
35.5	92	91	95	93	88	86	86	99	91	100	92	98	84	100	86	91	96	92	86	96	98	86	87	97	95	97	93
35.5	95	88	92	92	86	88	80	94	89	99	86	88	84	99	80	90	94	88	86	92	94	82	83	91	88	101	86
35.5	93	86	91	87	86	88	79	89	83	99	82	83	83	97	75	87	93	85	87	85	90	82	80	84	86	101	82
35.5	93	85	90	89	83	86	81	88	80	97	79	77	83	97	75	85	89	82	88	82	88	80	81	83	85	100	80
35.5	92	85	91	89	82	87	83	86	83	92	79	75	80	94	72	80	89	85	85	79	86	82	79	81	83	99	79
35.6	90	85	92	89	83	90	85	82	83	93	77	75	80	94	75	80	91	84	83	79	84	82	82	79	84	98	79
35.6	88	85	90	88	84	91	84	79	83	92	75	76	84	92	74	80	91	84	80	78	82	81	86	79	82	98	77
35.6	83	87	87	85	84	94	84	78	83	91	76	79	85	92	75	83	89	83	78	78	81	82	82	77	83	96	78
35.6	84	86	87	87	85	92	84	77	81	90	76	80	85	90	71	83	88	81	77	78	79	84	80	76	81	92	77
35.6	81	86	85	85	87	90	85	74	81	85	74	81	85	89	73	82	89	81	79	82	83	86	80	79	81	89	78
35.7	79	83	84	85	86	86	83	74	83	83	75	83	86	88	68	80	89	80	83	81	84	88	82	84	79	88	78
35.7	78	82	83	80	88	87	81	78	82	84	77	85	87	91	70	77	90	79	82	80	84	86	83	85	77	86	80
35.7	75	81	82	82	88	85	79	80	83	86	77	82	85	90	70	77	90	79	86	78	89	87	81	85	77	85	79
35.7	78	78	80	80	90	81	78	81	82	83	76	80	85	90	70	78	88	79	88	77	90	82	80	83	75	86	77
35.7	79	78	77	82	87	83	73	82	82	86	72	79	87	88	71	77	88	78	91	77	89	82	76	85	72	83	76
35.8	81	78	80	84	83	84	72	82	82	88	76	77	83	90	73	81	87	78	96	72	86	82	76	84	73	86	75
35.8	84	79	80	85	80	82	72	77	81	90	76	74	79	90	73	79	86	77	98	70	86	78	74	84	73	84	73
35.8	84	79	82	84	78	81	72	77	81	92	75	73	79	87	74	74	82	79	98	73	85	77	72	84	75	83	74
35.8	85	81	86	83	78	82	70	77	83	90	76	71	78	85	75	71	83	80	93	71	83	78	70	80	72	82	73
35.8	84	82	87	84	79	85	70	75	82	92	77	70	78	83	77	74	83	77	88	71	85	76	71	75	71	81	74
35.9	82	84	86	83	79	85	69	76	82	93	79	69	78	83	78	77	84	80	83	73	81	75	68	75	69	83	76
35.9	80	86	86	82	80	84	70	73	79	92	82	72	78	78	76	79	81	79	81	73	81	77	69	71	67	80	77
35.9	81	86	82	84	81	79	72	72	75	92	81	74	77	76	73	78	88	78	77	74	81	76	72	74	69	78	80
35.9	79	86	82	80	82	80	75	73	73	92	83	74	76	75	71	76	92	82	78	75	80	76	73	76	70	75	80
35.9	76	86	83	80	79	77	77	73	73	93	86	75	78	76	69	74	91	81	79	73	79	75	73	79	71	77	80
36	74	87	86	77	80	77	79	75	71	93	86	74	80	78	77	74	91	81	79	71	79	75	72	77	68	78	81
36	75	87	86	78	76	77	81	73	69	95	84	74	80	78	77	75	91	80	80	71	80	74	73	75	68	80	82
36	76	86	85	77	75	75	80	72	66	95	83	75	83	81	79	76	90	79	80	71	80	74	76	73	66	84	82
36	77	84	87	77	72	76	76	71	65	102	80	77	84	79	80	76	90	77	80	73	82	77	75	72	68	80	82
36	78	82	88	77	71	76	78	67	67	101	80	77	83	84	80	76	87	77	80	71	83	77	75	71	68	78	82
36.1	78	79	86	76	73	75	78	65	65	98	77	78	83	83	82	73	83	75	79	73	84	75	72	71	69	78	80
36.1	77	78	86	77	75	74	76	65	67	98	75	78	85	84	81	71	82	73	77	72	83	75	71	70	69	79	79
36.1	78	76	86	80	78	76	75	67	70	91	74	79	87	85	80	71	84	70	76	69	86	78	72	69	66	77	75
36.1	77	78	84	82	78	81	78	70	74	89	73	78	85	84	79	70	84	68	75	69	86	78	71	68	65	77	73
36.1	75	80	81	81	82	83	73	72	75	87	76	75	83	87	76	70	86	70	80	70	88	76	70	69	66	77	72
36.2	76	84	78	85	85	86	74	72	75	87	79	74	81	85	71	70	84	68	82	68	89	74	76	70	66	75	69
36.2	75	87	72	84	86	87	74	73	76	87	78	71	77	86	66	73	90	69	83	66	87	74	75	73	70	75	71
36.2	75	88	71	85	86	90	75	76	74	90	82	67	77	84	62	71	90	72	84	63	84	73	74	73	69	76	70
36.2	76	88	71	87	85	88	73	74	76	92	82	64	79	83	63	71	90	70	85	63	83	74	71	74	68	75	71
36.2	78	88	74	86	86	88	72	74	76	91	80	62	79	83	62	69	91	71	87	62	84	77	72	75	66	76	73
36.3	81	88	73	88	84	88	73	73	76	94	81	65	80	82	59	72	93	74	84	66	83	78	74	74	67	79	74
36.3	81	87	72	88	82	85	73	70	74	100	81	66	81	79	59	73	94	77	82	67	82	80	76	76	66	83	75
36.3	81	87	77	88	79	84	72	71	74	102	78	67	82	81	60	75	96	79	83	73	84	83	76	76	68	83	73
36.3	81	85	78	85	81	82	75	70	75	101	76	68	85	85	63	77	97	80	80	75	84	80	76	75	70	88	72
36.3	82	83	83	85	84	77	77	71	73	98	75	68	86	84	68	78	94	82	80	76	83	80	73	77	72	92	72
36.4	83	85	88	87	84	75	79	72	77	96	77	71	85	84	69	77	93	83	80	79	82	79	74	76	73	94	72
36.4	85	84	90	88	84	79	82	73	79	92	75	71	84	84	69	79	96	84	83	80	86	81	76	75	72	96	71
36.4	87	84	92	86	86	82	85	76	81	92	77	72	85	84	72	81	95	83	84	82	85	80	75	75	76	96	72
36.4	88	83	92	83	90	83	83	77	82	93	82	75	83	83	72	81	95	84	88	83	88	80	78	75	78	94	75
36.4	89	84	90	84	88	90	85	80	85	94	84	75	82	82	73	82	92	81	85	82	87	80	80	76	77	94	75
36.5	88	84	89	83	88	93	87	80	85	91	84	76	81	83	73	84	89	80	82	81	84	82	78	77	78	91	78
36.5	90	84	90	86	87	93	87	83	82	92	85	75	83	82	72	83	86	78	80	80	84	82	80	74	78	90	78
36.5	89	80	90	85	86	95	81	82	82	92	86	75	85	79	71	84	86	75	79	79	83	84	79	77	77	86	77
36.5	87	79	89	87	86	95	80	83	79	88	83	74	85	79	69	82	86	78	79	79	80	84	81	78	78	84	77
36.5	87	78	84	90	83	93	78	82	75	88	81	75	85	77	69	85	84	81	79	77	77	82	80	79	78	85	76
36.6	82	76	82	90	79	91	74	78	71	89	80	77	84	74	69	82	84	82	80	75	75	83	79	82	77	85	78
36.6	80	76	84	89	78	89	70	76	71	86	74	75	83	77	71	81	85	81	80	77	77	84	79	80	78	85	75
36.6	79	75	81	87	82	86	68	75	70	84	73	73	84	72	73	79	86	80	80	76	76	79	77	79	79	86	75
36.6	77	76	80	86	83	82	69	74	69	79	73	71	81	68	71	76	86	81	80	74	76	78	74	79	77	85	75
36.6	78	77	77	82	80	79	68	73	71	79	70	70	78	66	71	72	90	79	80	72	74	77	73	75	76	84	75
36.7	78	76	76	81	81	76	65	71	69	77	70	70	74	66	71	72	94	75	81	70	75	75	71	73	75	84	74
36.7	80	75	75	77	79	72	66	71	70	78	72	71	75	63	70	72	94	72	79	70	75	77	66	73	73	82	75
36.7	75	74	73	72	76	72	64	71	71	77	72	71	73	64	71	69	94	72	80	68	76	76	65	73	70	81	72
36.7	72	75	72	72	74	74	65	69	71	78	72	68	72	66	70	68	90	66	78	68	79	73	60	70	65	80	68
36.7	71	76	74	74	72	77	67	69	71	78	70	67	71	68	71	70	86	64	76	66	80	75	59	69	66	78	68
36.8	73	78	76	79	70	81	66	71	70	78	69	66	72	67	70	73	87	63	78	63	79	72	61	66	65	78	65
36.8	71	78	76	82	70	83	65	74	69	79	72	66	75	68	68	76	86	63	80	62	79	72	61	68	63	82	66
36.8	69	78	79	85	72	83	67	74	66	79	69	66	74	72	67	78	86	68	82	61	77	70	64	69	64	82	67
36.8	70	78	80	89	73	85	67	76	62	81	68	65	72	73	68	79	83	73	84	59	79	72	66	67	65	81	69
36.8	67	79	85	90	74	87	66	74	63	84	67	69	74	78	67	79	83	77	84	61	83	74	73	68	66	81	71
36.9	69	79	87	91	76	88	67	73	68	86	67	70	76	82	65	80	81	80	86	63	88	77	76	68	66	83	72
36.9	73	82	88	95	80	92	73	76	69	86	70	73	78	85	65	78	82	83	87	65	90	74	77	71	67	85	74
36.9	75	84	88	95	84	94	74	77	71	86	73	75	76	90	64	77	83	86	85	65	92	76	78	73	68	87	74
36.9	79	88	88	94	82	92	77	77	75	87	76	77	79	93	68	77	83	88	84	66	94	79	77	75	70	92	75
36.9	80	88	90	92	82	91	78	77	76	86	83	79	82	96	70	77	85	89	82	69	95	81	75	78	72	94	75
37	83	91	89	90	80	88	79	79	79	84	85	80	86	95	73	77	85	89	79	71	95	83	75	82	73	90	75
37	84	89	91	88	82	90	79	79	81	81	87	75	84	98	73	77	84	90	79	74	95	83	75	84	74	90	74
37	89	89	90	87	80	89	77	78	81	83	90	75	83	96	74	76	82	86	77	78	93	82	75	83	74	86	74
37	92	87	90	86	77	90	77	80	86	80	90	75	82	94	76	78	83	83	74	80	89	84	76	87	77	86	76
37	94	84	89	84	76	89	76	80	89	76	88	75	82	89	79	77	83	81	74	80	83	81	76	85	77	84	75
37.1	91	82	86	82	77	85	74	79	87	74	84	75	82	88	78	76	82	78	73	82	78	82	77	83	77	84	77
37.1	88	78	87	79	74	82	73	79	84	74	78	72	76	84	79	73	81	80	73	79	72	80	77	81	77	79	79
37.1	86	75	84	79	71	80	70	78	80	73	73	71	74	78	79	70	80	77	73	80	70	82	75	77	77	77	78
37.1	81	73	85	76	69	77	69	72	81	73	69	73	72	76	76	68	80	75	78	80	70	78	76	75	74	78	79
37.1	80	72	83	77	66	75	69	69	79	73	66	72	71	71	74	66	80	73	77	79	69	77	72	71	72	77	79
37.2	76	72	80	76	68	72	68	64	75	71	63	73	67	68	73	64	80	70	75	77	66	73	71	68	70	76	75
37.2	73	73	76	72	67	69	67	61	73	71	62	71	64	65	71	63	79	70	76	73	65	73	69	65	66	76	74
37.2	71	75	73	68	65	65	67	57	70	69	62	70	64	61	67	62	79	70	77	70	65	70	67	63	65	79	71
37.2	71	76	71	64	66	64	66	57	67	69	59	68	64	62	67	62	78	70	77	67	66	65	67	63	64	76	69
37.2	73	79	68	63	66	62	64	57	66	66	59	67	64	64	64	61	76	68	75	64	64	61	66	62	65	72	65
37.3	73	77	69	64	67	64	62	57	65	67	60	62	61	67	59	62	74	68	77	64	65	61	64	62	63	69	61
37.3	72	73	65	63	65	64	58	57	64	67	59	62	61	67	60	63	72	66	76	62	63	57	63	62	63	68	57
37.3	71	71	64	61	63	66	58	58	66	64	61	62	62	72	60	65	68	67	73	62	64	59	61	64	62	68	56
37.3	71	69	63	62	64	68	57	56	65	63	60	61	64	72	62	66	64	69	71	60	61	61	60	60	62	64	56
37.3	68	67	61	65	62	67	57	56	63	63	59	62	65	74	61	65	64	67	69	62	63	63	59	60	61	63	58
37.4	69	64	62	67	59	68	57	55	63	67	62	62	64	72	61	65	61	67	67	58	65	65	57	61	60	61	59
37.4	67	59	62	68	59	70	55	54	61	67	62	62	67	70	61	68	58	64	67	59	65	67	55	60	61	62	57
37.4	67	58	64	70	59	69	58	53	64	69	63	61	68	69	60	67	59	61	66	59	67	67	58	58	60	61	58
37.4	67	57	62	70	59	69	58	53	65	70	62	58	70	68	60	67	59	59	60	59	68	71	56	57	58	59	60
37.4	65	59	62	68	63	66	59	51	66	70	66	56	69	66	58	68	60	58	61	59	69	74	58	56	56	58	61
37.5	66	62	64	67	63	64	64	52	63	71	68	53	68	65	56	68	60	59	63	57	70	71	57	54	53	59	64
37.5	69	64	64	64	64	64	64	54	59	70	71	54	67	65	55	66	62	57	64	57	71	70	57	56	52	60	64
37.5	68	64	64	62	66	63	66	54	60	70	72	53	66	67	57	63	63	56	62	58	72	69	58	56	51	59	65
37.5	69	64	68	63	64	62	64	55	57	68	72	53	65	70	57	61	66	54	61	59	71	68	57	57	52	58	62
37.5	66	63	72	63	65	65	62	56	56	67	70	53	63	68	56	62	69	54	62	60	70	67	57	58	51	60	60
37.6	65	64	73	59	63	66	58	57	56	64	69	53	62	68	54	65	69	54	60	56	68	64	57	58	54	61	58
37.6	64	66	72	57	60	66	57	59	53	59	69	55	60	70	54	64	68	56	58	57	68	67	56	57	53	61	58
37.6	62	67	70	59	61	68	53	57	55	60	65	57	60	67	54	62	68	56	57	59	66	67	53	57	54	61	56
37.6	61	65	68	60	58	67	51	56	56	62	61	59	58	66	55	59	67	55	58	59	66	62	52	57	56	62	56
37.6	62	62	65	59	60	69	50	56	58	63	58	58	58	67	54	59	65	55	58	57	63	63	50	58	56	61	53
37.7	61	59	64	58	61	70	50	56	56	64	54	56	58	67	56	61	63	56	60	59	61	63	51	57	55	62	53
37.7	59	57	63	61	63	69	49	59	61	64	51	55	56	65	56	60	62	56	58	59	61	62	54	56	54	61	53
37.7	58	57	61	61	63	68	49	58	63	62	50	53	56	65	58	63	59	59	61	61	62	62	53	56	54	62	55
37.7	58	61	60	62	63	68	55	57	60	61	53	52	56	61	58	62	59	57	66	60	65	64	56	54	53	61	57
37.7	59	61	58	63	64	64	59	56	57	62	55	52	53	60	56	60	59	59	67	59	67	62	56	55	51	61	57
37.8	61	60	58	63	64	64	60	55	57	63	56	51	53	56	58	58	61	57	68	61	68	64	55	56	50	62	58
37.8	61	56	61	62	63	63	60	53	57	64	58	51	53	54	60	60	62	56	66	63	71	65	58	55	51	60	58
37.8	64	57	64	65	59	63	59	54	52	64	60	52	57	54	59	62	64	56	67	62	73	65	60	53	50	61	58
37.8	63	59	66	64	59	62	60	52	52	65	60	52	58	51	58	65	66	54	67	60	72	66	62	53	52	62	56
37.8	62	63	67	64	58	62	59	52	52	65	61	54	60	53	55	66	66	55	66	57	72	68	61	53	55	62	54
37.9	60	65	66	68	57	59	58	51	51	64	61	55	60	57	55	64	67	55	66	59	73	67	60	53	54	63	52
37.9	60	64	63	68	53	59	56	51	53	68	61	55	61	58	53	63	69	56	66	59	72	66	58	54	56	66	53
37.9	61	63	63	69	51	59	58	52	54	68	59	55	62	61	53	62	70	56	68	57	70	62	58	54	55	67	55
37.9	62	63	63	72	52	59	59	51	55	67	61	57	62	65	52	61	68	55	67	57	65	60	57	55	54	67	55
37.9	59	62	64	74	53	60	56	51	55	68	61	59	60	68	51	61	70	56	63	59	61	61	57	55	52	68	56
38	56	61	65	74	55	62	53	53	60	66	59	59	57	69	48	59	66	57	62	58	61	62	57	55	53	66	54
38	55	62	64	72	54	63	55	54	59	62	57	58	56	69	49	61	64	59	63	57	58	60	53	53	54	66	56
38	55	65	64	68	55	66	59	54	58	62	55	58	55	67	47	58	62	57	64	54	58	59	52	53	54	63	57
38	57	60	64	68	58	66	57	55	59	62	57	58	54	65	45	56	60	57	62	55	58	59	49	55	53	64	59
38	58	60	66	66	59	67	57	57	59	61	55	56	53	62	47	57	58	56	61	57	58	58	48	54	55	62	60
38.1	62	58	69	66	59	67	55	59	58	59	54	56	57	62	46	60	56	56	60	58	60	59	49	51	56	58	61
38.1	62	58	69	71	61	66	55	59	54	58	54	58	60	62	46	58	58	56	61	57	61	59	48	53	56	57	62
38.1	63	59	68	71	63	63	57	55	55	59	52	58	60	63	47	57	61	56	63	57	64	61	48	55	56	57	60
38.1	63	63	66	72	65	61	55	56	56	61	51	57	57	66	47	56	64	59	63	58	68	60	48	55	54	57	60
38.1	64	62	64	73	64	59	54	56	54	62	51	53	58	69	47	55	68	58	61	57	73	59	51	56	55	57	60
38.2	64	58	61	71	59	57	55	59	56	61	54	52	59	71	46	54	69	59	60	58	72	58	53	58	54	59	60
38.2	62	57	61	71	58	56	56	57	56	62	53	51	60	71	49	54	70	60	60	56	73	57	54	59	54	60	60
38.2	63	57	60	74	59	54	56	57	56	62	55	53	57	70	50	53	70	62	56	57	69	56	56	61	56	61	59
38.2	60	57	58	72	57	55	58	57	56	63	55	51	55	70	50	55	72	64	53	58	65	61	54	62	55	63	58
38.2	59	56	59	69	57	53	58	56	56	64	53	49	55	68	52	56	70	63	54	55	64	64	54	60	55	64	59
38.3	58	57	62	67	56	53	60	53	56	63	53	46	56	65	54	60	68	63	55	53	62	64	54	58	55	68	61
38.3	58	57	64	64	57	54	61	54	56	65	54	47	60	62	54	59	67	59	58	52	60	64	53	58	56	69	60
38.3	61	54	68	64	56	57	60	56	57	64	58	48	62	62	53	60	65	60	58	52	59	64	53	57	55	70	61
38.3	59	53	70	63	57	57	59	56	59	63	58	48	63	60	53	60	64	61	56	54	57	62	54	54	55	68	58
38.3	61	53	73	66	57	59	57	57	59	63	55	49	65	57	54	60	65	63	59	53	56	61	53	52	54	62	57
38.4	57	57	72	69	58	59	56	55	56	64	57	52	63	56	51	59	66	62	60	51	59	59	53	53	51	59	56
38.4	58	59	71	70	60	62	54	52	58	64	57	49	63	57	53	58	65	63	62	52	60	60	55	50	49	58	54
38.4	57	62	69	69	63	63	50	54	58	66	55	47	61	57	53	55	65	62	64	51	62	60	57	49	49	57	53
38.4	57	61	65	67	60	63	50	56	57	65	57	46	62	60	53	55	66	61	62	51	64	59	57	50	48	56	52
38.4	56	61	62	65	57	64	48	57	58	63	59	48	61	61	53	55	63	61	61	53	64	59	59	52	49	56	50
38.5	56	63	59	65	55	63	49	55	58	64	58	48	60	61	53	55	65	63	62	52	65	59	59	52	52	59	51
38.5	59	64	57	64	56	61	51	59	57	64	58	50	59	64	54	54	64	64	61	53	62	59	58	53	54	59	51
38.5	59	63	57	65	55	61	56	58	55	65	58	50	60	66	54	53	64	63	58	53	62	60	57	54	54	62	52
38.5	60	62	60	65	58	60	57	57	55	65	56	52	60	66	55	51	64	60	61	51	65	61	55	54	54	65	57
38.5	61	60	61	64	55	61	60	57	56	65	56	53	61	67	56	52	64	60	65	53	67	60	55	56	55	66	57
38.6	63	59	62	63	55	62	60	58	57	65	56	57	61	69	54	55	67	59	67	53	67	58	54	56	59	66	59
38.6	62	56	64	62	55	64	62	59	58	65	58	59	63	69	51	55	66	62	68	51	67	57	54	57	61	65	59
38.6	62	54	68	67	58	62	63	56	57	63	57	60	62	66	52	53	67	63	68	49	65	57	55	55	59	64	57
38.6	63	57	70	66	59	63	62	56	56	64	59	58	61	64	53	54	66	63	71	49	64	55	56	56	59	63	56
38.6	62	60	70	66	61	62	62	57	55	63	60	59	60	64	53	55	65	64	71	49	64	58	56	55	59	61	56
38.7	63	61	70	65	62	62	61	56	55	63	59	57	62	64	54	54	63	65	71	51	59	58	56	54	60	62	54
38.7	62	60	69	63	64	63	57	59	55	65	58	54	59	65	55	52	60	62	71	52	61	59	55	55	59	61	54
38.7	62	60	67	61	60	62	57	61	55	65	60	55	58	66	55	54	59	62	68	53	62	59	53	54	57	60	52
38.7	61	58	67	59	58	64	55	60	55	64	61	53	59	65	55	54	56	64	65	55	62	59	53	54	58	59	48
38.7	62	57	66	61	57	63	57	61	55	64	59	54	60	65	55	51	58	65	63	56	60	58	53	54	57	61	50
38.8	61	56	68	58	58	62	58	63	52	65	56	55	62	67	54	51	57	63	59	59	60	59	52	55	56	62	48
38.8	59	53	69	60	59	63	59	64	53	62	56	56	64	69	54	50	58	63	57	57	61	60	53	55	55	65	51
38.8	58	51	69	60	57	64	57	65	53	64	54	58	64	70	54	51	60	61	61	57	62	61	52	55	54	64	54
38.8	58	51	66	62	53	65	56	65	53	65	57	57	65	70	56	53	62	64	60	58	64	58	55	56	53	62	56
38.8	56	52	65	62	54	67	54	65	57	66	55	57	65	70	56	56	65	64	63	56	64	59	57	55	53	64	58
38.9	56	54	66	63	58	68	53	65	58	68	54	56	68	68	57	57	64	63	64	52	63	59	57	56	52	67	59
38.9	58	58	68	64	60	69	52	65	57	68	54	58	70	67	60	57	66	63	66	52	60	59	59	56	51	67	61
38.9	60	60	66	63	61	73	50	65	58	73	56	57	74	68	60	60	64	63	68	55	63	57	59	58	51	69	62
38.9	62	64	64	63	64	70	53	65	58	73	57	58	75	66	61	61	67	67	67	58	66	59	60	56	52	65	64
38.9	63	63	62	67	67	70	52	66	58	78	59	57	74	67	60	64	68	65	70	59	65	56	61	56	52	67	63
39	64	62	61	70	69	73	52	66	58	79	61	56	74	66	59	64	70	64	69	62	68	58	61	54	52	66	62
39	67	64	61	72	68	74	55	65	61	78	65	59	75	66	58	65	75	62	67	63	71	60	64	55	51	68	62
39	69	65	63	75	69	74	55	64	64	79	65	59	75	65	55	64	79	65	67	66	74	59	66	57	53	73	62
39	70	65	65	77	68	75	57	64	67	80	66	62	74	67	53	63	85	66	68	66	76	59	66	59	55	76	67
39	71	68	68	79	69	75	59	64	68	81	67	63	75	74	51	63	90	66	69	66	82	63	68	61	58	84	65
39.1	73	70	73	82	71	76	62	66	71	83	71	64	75	77	51	62	98	68	75	63	86	64	69	63	57	87	69
39.1	76	72	77	87	73	80	65	67	72	87	74	66	77	79	53	65	102	69	78	66	92	69	70	64	58	91	71
39.1	79	78	82	92	72	86	68	68	74	89	79	62	78	83	59	65	108	73	82	65	98	74	73	67	59	96	73
39.1	83	86	87	93	77	92	70	70	77	96	78	64	80	88	61	65	111	76	88	65	104	77	71	66	64	104	74
39.1	86	91	94	98	85	100	73	73	77	98	80	68	85	90	64	67	112	79	96	65	106	82	71	70	68	108	77
39.2	89	99	99	101	91	105	78	76	76	103	84	70	91	91	68	73	112	86	103	71	107	87	73	72	70	113	78
39.2	89	101	104	104	97	110	80	78	78	110	90	70	94	96	72	75	112	92	108	76	112	91	75	75	73	117	81
39.2	92	103	107	107	106	110	83	82	81	114	91	71	99	96	80	81	115	100	111	81	113	96	80	78	76	115	86
39.2	94	103	111	111	107	111	87	89	85	118	93	74	101	97	82	88	111	100	114	85	112	97	85	80	77	117	88
39.2	95	105	111	110	111	111	88	89	91	120	95	79	104	99	87	92	110	101	115	90	114	100	88	82	79	113	92
39.3	98	106	111	110	109	108	87	95	98	117	100	84	107	99	91	98	107	102	111	93	112	102	93	88	81	113	96
39.3	99	105	111	108	109	100	88	97	102	117	97	88	107	101	92	102	106	109	112	96	107	99	94	89	84	111	101
39.3	96	104	107	104	105	98	88	95	105	113	98	93	107	101	94	102	103	107	112	93	103	96	92	93	90	109	107
39.3	94	101	103	102	102	95	87	94	105	110	98	96	108	100	96	103	101	104	109	90	98	96	94	97	91	107	108
39.3	95	99	100	99	98	90	88	94	103	107	97	96	107	96	97	102	98	103	104	90	96	91	94	98	92	101	108
39.4	90	94	95	99	92	90	87	91	100	100	99	94	106	94	99	103	93	101	98	91	92	92	94	97	93	97	109
39.4	90	94	91	94	86	90	87	91	97	94	97	92	101	93	99	97	92	99	94	88	90	91	93	93	95	92	106
39.4	88	92	86	90	83	86	85	87	93	90	94	96	98	89	95	89	85	95	91	87	86	86	89	90	95	89	101
39.4	84	87	80	89	82	85	84	89	88	85	92	95	94	83	91	88	81	93	91	84	79	87	87	89	94	86	95
39.4	80	86	75	83	82	84	81	87	85	83	89	92	90	82	89	85	79	91	85	83	75	87	84	86	91	82	91
39.5	77	81	72	79	79	79	78	84	83	81	85	89	84	79	87	80	78	89	82	81	75	85	81	83	89	76	86
39.5	75	77	68	77	78	75	76	82	80	79	78	87	79	73	83	78	75	86	78	78	72	84	78	79	84	70	82
39.5	73	74	66	74	73	73	75	78	78	75	74	85	73	70	79	78	73	83	73	75	70	82	77	75	80	67	75
39.5	72	74	64	72	74	69	71	75	75	74	70	82	69	69	74	75	71	82	70	73	68	80	75	73	75	63	68
39.5	68	74	64	70	70	66	68	75	72	71	66	80	67	65	69	73	70	82	66	68	64	77	71	70	68	61	63
39.6	66	71	63	69	70	63	68	68	70	70	58	76	66	63	63	69	72	79	67	61	62	74	67	66	62	61	60
39.6	62	69	59	69	69	63	65	62	68	68	55	72	65	62	58	65	68	75	66	55	59	71	62	66	61	63	57
39.6	55	67	59	68	65	62	62	60	68	69	56	66	65	62	57	63	67	71	62	52	59	68	61	66	57	62	52
39.6	56	67	61	68	61	59	61	57	65	69	54	61	64	61	52	60	65	70	57	53	61	65	58	65	55	64	51
39.6	54	65	60	68	59	59	60	54	62	66	55	58	61	61	50	60	61	66	57	55	59	64	57	63	55	64	53
39.7	59	64	62	65	58	55	58	54	60	65	54	57	59	60	50	56	61	64	56	55	61	63	55	60	56	64	53
39.7	60	62	60	62	57	53	55	56	60	66	55	57	58	61	49	56	60	59	58	53	61	59	53	58	55	65	54
39.7	59	60	58	59	58	52	54	59	58	64	57	55	59	61	50	57	60	55	58	52	61	60	52	59	57	64	55
39.7	58	58	58	59	59	50	52	59	58	61	58	55	58	65	52	57	60	54	58	55	61	60	54	59	55	63	56
39.7	59	56	59	58	60	48	51	59	58	60	60	56	57	63	52	59	60	55	61	57	62	60	55	58	57	62	55
39.8	60	56	60	59	61	49	48	59	59	59	62	53	57	61	54	61	63	54	60	59	60	61	53	58	55	62	56
39.8	62	57	61	59	63	50	46	61	59	59	61	52	58	61	54	60	64	57	60	60	61	60	55	55	54	61	53
39.8	63	58	59	60	65	53	44	61	58	59	60	52	60	63	54	58	64	58	58	58	61	58	53	55	53	59	51
39.8	61	59	57	60	64	54	46	61	58	58	60	52	62	64	53	58	66	57	59	56	63	57	53	54	51	59	50
39.8	59	59	56	64	65	57	47	59	62	59	58	50	65	64	50	59	67	58	58	52	66	55	51	55	50	60	50
39.9	57	60	52	66	64	58	48	59	63	61	59	51	64	64	50	59	65	61	56	54	64	55	52	56	49	60	49
39.9	55	61	56	66	64	60	48	57	64	63	60	50	64	62	51	58	65	63	56	53	61	55	51	55	48	60	50
39.9	59	62	56	65	64	61	49	55	63	65	59	52	63	63	47	58	65	60	58	55	61	56	52	52	50	63	53
39.9	63	62	55	64	66	61	51	52	62	64	59	54	60	62	48	59	64	61	60	56	59	55	51	49	52	64	52
39.9	64	63	56	63	65	64	53	50	62	63	57	54	61	61	50	57	66	63	60	56	61	55	49	47	52	68	52
40	64	62	56	65	65	68	56	52	60	65	57	54	61	62	53	59	67	62	63	56	60	56	50	48	51	69	54
40	64	62	57	65	62	69	56	52	56	66	56	53	64	61	57	58	66	60	64	59	59	59	56	53	52	71	54
40	65	63	59	66	61	70	58	54	57	66	57	54	64	62	61	58	66	62	66	59	58	58	58	53	52	72	53
40	66	62	62	67	60	70	56	55	57	68	57	56	64	62	60	59	65	61	67	60	58	61	59	55	53	72	54
40	66	61	64	71	61	69	56	56	57	71	54	54	64	62	61	57	66	60	65	62	60	62	58	57	54	71	56
40.1	66	61	66	71	61	69	58	56	56	70	50	56	63	64	60	55	66	61	65	61	64	63	59	59	56	71	54
40.1	67	59	64	73	62	68	57	54	56	68	50	58	62	64	59	56	65	61	63	59	65	65	54	62	60	70	55
40.1	64	59	66	71	62	70	57	58	59	66	52	61	62	64	58	58	64	61	64	61	67	64	54	61	62	70	56
40.1	62	60	65	71	63	71	55	58	64	67	53	61	58	61	55	59	64	62	64	60	66	62	52	64	64	66	59
40.1	62	61	65	68	63	72	56	60	64	67	56	62	57	60	54	57	60	61	64	64	62	65	55	61	63	66	58
40.2	61	64	67	66	67	71	57	61	66	67	58	62	54	58	52	56	60	59	66	63	60	66	53	58	64	67	61
40.2	61	65	67	61	69	69	57	64	67	66	59	61	53	58	49	55	57	57	63	64	60	67	52	57	66	68	64
40.2	62	67	68	60	73	68	60	62	69	64	60	61	54	55	51	54	57	57	63	64	57	68	52	54	65	71	64
40.2	62	68	68	61	72	72	58	63	68	63	61	59	56	55	52	54	57	57	62	64	58	68	52	52	65	73	64
40.2	61	68	67	62	71	71	57	65	68	66	63	56	56	56	54	55	56	57	63	65	58	69	55	52	64	73	66
40.3	62	70	65	61	68	69	56	66	66	67	64	54	61	57	56	56	58	57	59	62	57	66	60	56	62	72	65
40.3	63	70	65	61	68	68	57	66	67	67	65	55	63	62	58	56	59	57	58	60	61	64	61	56	61	70	62
40.3	61	67	63	61	68	66	55	66	64	68	63	55	65	66	56	58	60	58	59	60	62	65	60	59	60	68	62
40.3	59	65	63	65	66	66	56	66	62	67	60	53	67	67	54	59	62	57	57	62	65	61	60	62	62	66	61
40.3	59	67	65	66	63	66	55	63	59	63	59	55	66	68	55	62	63	62	59	60	68	59	60	62	60	64	57
40.4	58	64	64	69	62	65	54	62	60	63	58	55	66	69	55	64	66	62	61	60	71	60	60	60	58	62	56
40.4	58	65	65	68	61	67	55	62	60	62	60	56	67	70	54	66	69	65	64	61	73	57	61	59	59	61	55
40.4	57	67	63	67	59	65	55	59	59	65	60	55	65	70	54	66	71	66	64	60	68	56	63	62	58	59	55
40.4	57	69	64	66	56	66	56	58	56	66	61	56	64	69	53	63	70	65	64	60	64	57	63	61	56	61	53
40.4	58	73	63	66	57	63	57	57	57	67	60	57	64	68	52	62	72	65	65	57	62	57	62	62	58	61	56
40.5	61	76	64	64	56	62	57	57	59	70	58	53	65	67	52	62	70	64	65	56	61	59	61	63	57	63	57
40.5	62	74	65	68	58	60	58	55	60	73	60	55	67	65	54	59	72	62	71	55	59	60	60	63	57	67	59
40.5	62	78	66	70	59	66	55	56	59	78	61	54	67	69	53	59	74	63	70	54	63	60	61	62	58	71	59
40.5	64	77	67	69	59	65	56	56	59	85	62	52	67	71	56	58	77	64	72	54	63	61	62	63	56	72	61
40.5	64	76	68	68	60	66	58	55	58	89	66	52	71	74	56	61	83	64	70	53	67	61	62	67	57	77	59
40.6	65	75	69	71	60	70	58	56	56	95	67	52	71	79	60	61	85	64	74	55	75	62	62	65	56	84	58
40.6	68	76	74	75	65	74	59	60	57	101	67	53	73	79	56	65	91	66	75	58	78	61	61	69	57	85	59
40.6	71	76	82	83	68	80	60	63	57	108	70	56	74	81	57	71	95	68	75	61	86	61	63	70	59	94	61
40.6	76	78	86	91	74	88	63	67	58	115	74	60	78	85	60	78	103	74	80	61	95	66	67	70	59	99	64
40.6	83	78	92	102	78	100	67	71	60	129	79	63	80	88	63	82	116	77	85	66	106	70	72	73	60	109	64
40.7	91	87	99	114	86	111	72	77	63	140	87	65	88	98	63	91	128	85	94	69	113	76	73	74	61	118	65
40.7	98	99	110	126	94	120	76	81	70	151	93	69	95	108	67	94	140	92	103	72	119	81	77	81	64	129	67
40.7	107	113	118	135	102	132	83	88	75	161	99	72	104	118	68	99	152	98	112	75	130	92	79	82	70	140	73
40.7	117	132	127	144	112	143	90	96	86	168	105	76	114	129	71	109	163	106	126	78	142	106	85	87	77	151	83
40.7	131	149	137	155	121	151	99	105	95	174	114	84	123	138	73	114	170	116	136	86	157	122	93	93	83	162	92
40.8	142	162	147	163	133	159	109	114	106	177	124	90	136	148	84	117	179	129	147	91	164	133	102	101	89	174	103
40.8	155	177	157	167	142	170	119	121	119	179	136	97	146	159	95	124	183	142	156	101	170	148	114	114	96	179	114
40.8	164	185	162	169	150	168	131	127	129	175	148	106	156	162	107	134	189	154	165	111	169	160	124	125	106	180	122
40.8	171	186	167	169	157	165	140	137	141	167	160	115	161	163	118	143	186	162	166	121	169	167	132	136	113	182	134
40.8	175	184	168	168	159	166	153	145	148	160	167	122	164	161	129	147	177	168	165	129	163	171	140	146	122	178	147
40.9	179	177	168	162	163	160	162	148	154	148	169	131	165	156	136	153	167	170	160	138	154	172	146	154	131	166	157
40.9	175	163	164	149	163	152	166	150	156	135	170	139	160	150	147	156	155	169	156	143	147	169	151	158	139	156	165
40.9	167	146	150	138	158	145	167	151	158	121	169	141	153	145	150	156	143	163	151	145	135	163	152	161	144	143	168
40.9	159	130	142	130	151	135	163	145	155	113	163	140	146	136	152	152	130	154	142	145	127	150	150	157	142	136	166
40.9	145	120	131	122	143	124	152	141	149	104	151	136	139	129	148	147	119	141	134	143	115	139	144	151	141	123	163
41	126	110	121	111	132	110	139	134	143	97	138	133	129	120	143	139	107	129	121	136	109	124	135	145	139	113	158
41	112	99	109	102	118	101	128	125	131	91	123	126	119	111	133	128	94	111	110	128	101	116	126	133	136	104	151
41	99	93	98	95	102	89	112	116	120	84	108	119	105	102	122	121	83	97	98	115	96	107	118	121	129	94	139
41	89	90	86	89	92	78	102	104	109	80	97	110	94	92	110	106	75	86	87	107	91	96	112	110	120	90	127
41	77	85	79	83	82	74	91	94	102	78	86	98	88	83	103	95	70	77	81	95	84	84	101	103	108	84	113
41.1	73	82	72	82	76	69	82	85	95	74	80	90	83	78	94	86	68	73	77	89	76	77	93	94	99	80	100
41.1	68	80	66	78	71	63	75	79	90	70	73	82	76	69	87	81	70	70	72	80	71	71	86	86	90	77	88
41.1	66	76	66	77	66	62	72	77	84	67	71	76	69	62	81	75	67	66	69	72	69	65	80	80	80	74	83
41.1	66	74	64	71	63	65	73	71	76	64	70	71	68	58	77	67	65	63	65	64	64	64	74	76	77	69	75
41.1	68	72	63	66	63	63	70	66	70	62	67	70	66	56	75	66	62	63	67	63	61	63	70	71	72	65	68
41.2	69	69	63	60	64	63	69	63	70	58	65	69	61	55	72	64	61	63	70	60	59	59	67	68	68	62	63
41.2	70	65	61	58	64	65	67	63	66	57	64	63	62	54	69	62	61	62	70	58	57	61	62	66	64	63	57
41.2	72	65	62	57	66	64	64	63	66	57	60	60	64	54	67	62	60	59	68	57	60	61	60	64	62	63	56
41.2	70	67	62	57	64	65	59	64	63	58	57	58	61	53	65	58	60	59	66	58	61	62	55	63	60	60	52
41.2	66	67	61	55	60	61	57	65	61	60	57	60	61	55	64	58	58	59	61	57	65	62	55	64	57	61	52
41.3	68	68	63	56	57	59	54	63	59	59	55	59	60	54	62	55	57	55	61	56	65	61	55	61	57	59	50
41.3	65	70	63	55	56	59	53	62	57	62	56	56	57	55	58	56	55	55	60	54	65	60	53	60	55	60	50
41.3	62	71	60	55	56	60	55	58	56	62	57	52	56	55	55	54	57	54	62	54	63	56	52	58	52	61	50
41.3	60	69	59	55	56	63	55	57	55	62	55	51	56	56	53	52	57	53	62	53	64	54	51	57	49	62	50
41.3	58	64	61	55	56	64	54	57	56	63	56	51	56	60	50	51	60	57	61	53	60	51	52	52	50	66	50
41.4	57	62	61	53	54	67	52	55	57	63	57	51	54	60	51	52	61	57	61	53	60	54	54	51	50	67	53
41.4	55	58	62	54	53	70	52	54	54	63	58	51	56	60	49	52	61	55	62	54	60	52	56	48	51	67	54
41.4	55	56	60	52	53	73	50	53	54	62	59	49	56	63	51	52	62	53	60	56	57	55	55	49	52	66	55
41.4	56	52	60	53	53	71	48	51	53	62	58	50	59	62	52	55	61	54	61	61	56	56	56	51	54	67	57
41.4	55	49	60	55	56	72	46	50	52	60	55	49	60	62	51	56	61	52	61	61	54	59	54	50	53	67	57
41.5	55	47	57	59	55	70	47	54	50	59	55	47	63	61	53	55	63	52	59	60	54	62	52	53	55	66	56
41.5	54	50	55	59	57	67	47	54	51	60	54	50	61	61	54	55	63	50	58	61	57	62	52	54	56	65	55
41.5	53	53	52	64	57	65	46	53	47	58	52	53	61	60	53	53	62	52	57	60	60	63	50	55	55	63	56
41.5	54	56	53	66	56	60	45	54	47	59	54	56	61	61	52	54	61	53	54	60	63	62	50	57	55	66	57
41.5	56	61	55	65	58	57	45	55	46	57	54	59	61	57	52	53	61	53	58	56	64	62	49	56	52	66	58
41.6	56	65	57	67	59	58	50	53	47	57	53	58	59	57	51	55	60	54	58	55	61	62	47	54	51	67	58
41.6	54	67	55	67	59	54	54	53	47	57	54	59	57	57	51	54	64	53	58	51	60	62	49	55	49	68	59
41.6	56	68	58	64	56	53	55	53	48	59	54	59	58	57	51	55	64	54	58	51	61	62	51	54	49	66	59
41.6	56	68	61	63	53	53	55	51	50	60	55	60	61	59	51	55	63	55	59	52	61	62	50	53	49	67	58
41.6	57	69	61	60	52	55	56	49	54	61	56	57	59	58	49	54	61	57	58	53	61	62	50	50	47	66	57
41.7	56	64	60	59	50	57	57	48	58	63	55	55	60	59	49	54	60	55	58	54	60	59	49	48	48	65	56
41.7	55	61	61	58	50	58	58	47	62	62	55	50	62	61	50	55	62	55	58	55	57	61	49	50	49	65	55
41.7	54	55	64	60	50	60	58	47	63	65	54	50	64	60	50	56	62	56	58	56	53	59	50	50	49	65	55
41.7	53	53	62	62	54	63	56	48	63	67	53	50	64	59	49	56	62	53	59	55	51	56	50	51	50	64	54
41.7	52	50	59	65	54	63	55	47	64	70	52	51	63	59	49	55	62	55	60	53	50	55	50	55	53	62	51
41.8	54	52	58	65	55	64	54	49	64	72	52	54	61	58	47	54	62	56	62	52	52	54	50	57	53	61	50
41.8	55	51	57	71	57	63	49	50	61	71	53	56	61	57	46	54	60	57	61	51	54	54	48	57	55	60	50
41.8	58	51	59	72	58	63	48	50	60	71	56	54	60	57	45	54	58	56	63	50	54	52	47	56	55	62	48
41.8	59	53	59	71	59	63	49	50	57	67	58	52	58	55	48	54	59	55	64	49	54	54	50	55	53	63	47
41.8	58	54	58	72	60	64	51	49	59	63	58	51	56	56	48	55	60	54	60	49	55	54	52	54	54	62	47
41.9	56	57	58	71	60	63	50	51	55	61	61	52	55	56	49	54	64	53	61	49	58	56	55	55	53	63	47
41.9	59	58	58	70	58	64	49	51	56	60	61	51	57	57	50	54	63	54	62	52	60	58	55	54	54	60	46
41.9	59	60	57	69	56	65	52	52	55	60	63	50	58	57	52	53	62	56	64	52	63	60	54	53	53	62	48
41.9	61	59	56	69	57	64	53	51	56	59	60	49	58	57	52	55	64	61	63	54	63	61	54	51	53	63	49
41.9	60	61	58	69	57	67	54	52	55	60	59	51	61	59	53	56	64	60	63	55	67	60	53	51	53	66	52
42	57	58	61	68	60	68	56	52	55	61	60	49	63	62	51	56	65	61	63	56	69	59	55	50	54	68	54
42	56	58	65	67	61	69	57	54	56	63	59	51	65	60	52	56	67	62	62	57	69	59	56	52	52	69	56
42	57	58	65	65	63	69	56	54	58	63	58	53	67	58	51	55	68	61	61	55	69	59	54	54	53	69	57
42	55	56	68	62	65	68	56	53	60	64	57	56	66	59	50	55	70	62	60	54	68	60	53	56	52	70	58
42	57	57	69	62	66	68	57	57	63	65	56	57	65	58	48	56	72	63	62	56	69	62	54	55	52	69	59
42.1	56	54	69	62	67	69	57	58	62	66	59	55	63	59	48	57	72	60	63	55	68	60	54	57	54	69	61
42.1	59	56	68	63	66	71	60	57	64	65	62	53	62	61	44	57	74	57	62	54	68	60	56	56	54	67	59
42.1	62	59	67	63	67	73	60	59	64	63	66	52	61	61	46	57	76	54	60	55	66	62	56	56	52	66	58
42.1	64	60	65	65	70	74	61	59	66	62	66	53	62	62	47	55	75	54	59	56	65	63	57	55	54	67	55
42.1	65	61	66	67	69	73	61	62	66	62	69	56	63	65	48	54	74	55	62	58	65	64	57	56	55	65	54
42.2	68	61	65	71	66	73	62	63	68	66	72	54	63	66	49	57	71	53	66	61	64	67	59	59	57	66	53
42.2	70	62	62	73	62	68	61	66	68	69	75	54	64	68	51	57	72	56	69	62	64	68	60	56	57	72	54
42.2	71	66	63	79	63	65	63	63	67	71	73	55	66	72	52	59	74	56	68	64	66	67	62	58	60	73	54
42.2	70	70	65	83	64	65	63	61	66	77	76	56	67	75	55	60	74	56	70	63	69	67	61	58	61	75	52
42.2	71	71	66	85	64	65	64	61	67	81	76	55	69	76	55	64	74	59	71	63	70	68	61	59	61	77	52
42.3	69	74	73	85	65	63	65	59	68	81	76	60	71	75	58	66	76	64	70	64	71	68	59	64	61	79	51
42.3	70	73	75	84	69	63	67	57	68	81	76	64	73	75	63	66	81	64	72	65	72	67	57	61	62	81	52
42.3	69	74	77	83	72	64	70	58	69	81	73	65	74	78	65	70	83	68	76	68	73	68	58	63	61	84	55
42.3	69	75	80	83	70	70	71	62	71	81	68	67	74	78	68	73	85	71	78	70	71	70	62	63	63	85	57
42.3	68	74	82	83	71	75	73	69	71	83	67	66	72	78	66	75	90	73	79	69	74	67	62	67	64	86	60
42.4	70	79	81	84	74	79	78	73	71	86	64	67	73	77	67	74	94	75	80	69	76	65	62	68	65	87	63
42.4	75	83	84	83	78	84	79	75	71	89	63	68	73	76	72	75	95	80	81	70	79	68	62	70	66	91	66
42.4	78	87	86	85	81	89	81	77	72	92	61	71	73	80	73	76	98	85	85	72	81	71	65	74	67	93	68
42.4	79	89	86	86	83	91	83	80	73	97	65	72	77	83	73	74	101	88	86	74	88	73	67	79	69	93	71
42.4	83	91	86	88	87	92	81	83	73	99	70	72	80	85	71	76	105	87	93	76	90	80	72	83	68	99	75
42.5	85	95	85	92	89	91	81	85	77	101	73	72	79	91	72	77	108	86	95	79	95	83	75	85	69	103	77
42.5	90	98	89	95	92	95	86	84	80	104	75	71	80	93	74	80	111	85	95	81	99	94	79	91	70	100	80
42.5	90	101	91	98	93	98	84	86	79	108	80	70	80	95	75	82	111	85	98	83	102	100	81	91	69	98	80
42.5	89	102	92	98	96	96	84	88	82	107	86	73	82	99	78	85	109	88	96	86	104	105	83	94	72	96	83
42.5	90	103	96	99	99	94	88	87	82	105	94	78	84	98	79	86	104	91	95	89	102	110	87	96	73	94	82
42.6	92	100	94	100	101	95	91	88	84	101	98	78	86	100	85	88	100	91	94	93	101	112	90	93	74	89	84
42.6	91	99	91	97	97	95	93	92	88	97	97	78	90	98	89	90	93	93	91	96	97	114	92	94	74	87	86
42.6	90	94	91	92	92	92	93	97	88	92	93	84	92	97	92	89	88	92	86	95	91	112	93	92	76	82	89
42.6	90	92	90	90	90	89	93	101	90	90	89	85	92	94	93	89	83	92	82	96	88	107	90	89	78	77	90
42.6	87	89	86	85	88	88	91	99	89	85	88	85	91	89	97	85	80	91	77	94	83	101	87	86	82	76	91
42.7	87	89	83	79	84	87	90	97	88	80	86	87	85	86	98	85	78	93	75	93	79	99	87	82	81	74	88
42.7	86	86	78	76	81	85	87	95	82	78	81	87	84	84	97	82	76	88	74	89	73	92	87	79	81	73	86
42.7	82	84	74	71	79	80	80	89	75	77	79	85	84	79	92	77	75	84	71	85	72	83	85	76	80	73	82
42.7	80	81	72	67	78	74	73	85	70	72	78	84	80	79	89	77	73	77	73	81	69	78	83	73	79	74	80
42.7	78	77	71	66	75	73	70	79	68	74	75	79	74	76	87	76	71	72	72	79	69	74	79	72	76	75	74
42.8	75	76	73	64	74	74	66	76	63	72	75	77	70	70	83	76	73	68	73	75	71	72	77	71	74	74	72
42.8	69	75	73	66	71	71	61	73	59	69	74	75	66	70	74	75	75	64	73	70	72	68	75	70	72	75	68
42.8	67	71	73	66	74	69	60	71	59	69	77	73	64	69	70	73	76	63	74	69	73	69	73	70	72	76	63
42.8	66	72	73	68	74	69	61	68	57	70	77	68	63	64	64	73	75	63	72	64	73	71	71	70	67	76	61
42.8	66	71	71	68	73	69	61	66	58	70	77	65	63	63	62	73	76	60	75	63	74	70	68	71	67	76	61
42.9	64	72	70	68	69	66	64	69	59	71	76	64	65	62	62	71	77	60	74	62	73	70	66	71	66	76	63
42.9	65	70	70	66	68	65	64	70	60	71	74	62	64	64	60	69	75	60	73	61	72	71	63	69	67	72	65
42.9	66	71	72	65	68	69	63	69	65	70	74	63	64	62	58	69	76	61	70	62	74	71	60	68	68	72	65
42.9	66	71	70	62	66	70	63	68	66	68	74	62	65	62	60	64	76	61	71	62	72	69	60	66	68	72	66
42.9	65	72	66	60	65	71	67	67	66	66	70	62	65	63	58	66	73	61	72	60	70	70	65	65	68	69	66
43	68	72	65	60	63	71	64	65	62	67	67	63	64	64	58	64	70	62	67	58	68	70	66	62	66	70	68
43	68	73	63	61	62	71	63	61	61	68	67	63	66	65	56	64	69	62	67	59	67	67	68	60	65	67	66
43	69	69	62	63	61	69	63	62	60	68	65	63	67	68	59	65	68	62	65	59	68	65	67	59	65	66	67
43	69	66	64	65	62	68	63	58	57	68	63	63	68	69	59	64	70	63	62	62	67	63	67	60	64	66	66
43	66	66	64	69	60	67	62	61	56	66	61	63	67	69	60	66	70	64	62	60	68	62	67	59	64	69	66
43.1	66	65	63	71	62	66	60	61	57	65	59	62	66	71	61	65	71	64	63	58	67	63	66	58	65	69	65
43.1	65	63	63	72	63	66	59	60	56	69	59	58	64	71	61	63	72	64	64	61	69	65	64	59	65	70	66
43.1	66	62	62	72	63	64	57	58	57	70	58	57	61	70	63	65	73	62	63	58	70	65	63	59	64	72	66
43.1	66	59	63	70	63	64	57	58	57	71	60	57	58	71	63	64	73	60	65	58	69	63	64	61	66	73	64
43.1	65	58	65	71	59	61	58	61	55	72	60	58	57	73	65	62	72	60	64	59	68	63	64	61	64	74	62
43.2	67	58	67	70	60	61	58	61	59	73	61	57	57	71	67	60	71	59	64	60	69	62	63	60	62	75	61
43.2	67	59	71	68	60	63	58	58	59	72	62	58	59	71	65	59	74	60	65	60	68	62	64	62	62	75	61
43.2	64	59	71	64	59	66	59	57	59	72	62	58	61	70	63	58	71	60	65	58	67	62	66	61	61	72	60
43.2	63	61	69	63	59	70	59	57	60	71	60	57	62	69	60	61	68	59	65	59	65	64	70	59	59	69	59
43.2	65	62	68	62	58	73	60	57	60	67	61	58	62	67	61	60	69	60	63	63	63	67	67	55	56	67	59
43.3	64	64	68	61	59	74	60	56	60	65	59	57	66	67	59	60	70	58	63	65	62	64	66	54	55	64	58
43.3	65	64	67	61	59	74	60	57	58	63	58	56	68	65	61	61	71	58	58	65	59	63	63	53	54	63	60
43.3	59	64	65	61	59	73	59	57	57	63	57	55	67	62	61	62	71	57	57	64	58	60	61	53	53	62	60
43.3	58	66	62	59	57	74	59	58	57	62	56	55	65	60	63	64	68	54	59	59	56	58	59	51	53	62	62
43.3	59	66	58	58	61	74	55	58	58	61	56	56	63	59	62	62	67	54	61	56	58	57	59	52	55	60	63
43.4	58	64	56	55	62	73	53	56	57	60	54	54	61	57	59	58	64	56	61	58	62	58	56	53	53	61	65
43.4	60	61	55	54	61	71	52	57	58	56	56	55	59	57	59	58	64	56	63	53	63	55	55	53	53	59	64
43.4	58	62	56	54	61	69	53	57	57	57	56	56	56	54	58	58	60	57	60	51	63	55	55	53	52	61	63
43.4	59	62	56	58	57	63	53	58	57	56	56	54	55	53	57	56	57	58	61	49	64	55	55	55	52	63	62
43.4	57	64	60	61	59	61	53	56	57	58	57	54	53	52	55	54	59	60	63	49	65	53	56	54	53	64	60
43.5	56	64	61	62	61	58	50	57	55	59	60	53	51	54	50	53	59	62	64	52	64	55	55	55	54	63	57
43.5	53	63	63	61	61	57	51	57	59	63	61	54	52	53	48	53	57	60	62	54	62	57	55	55	55	61	54
43.5	54	64	64	62	59	58	51	59	61	61	63	53	52	54	49	53	58	61	61	58	61	58	56	54	55	62	56
43.5	57	63	64	62	60	58	53	59	61	59	63	54	52	55	50	51	60	61	55	60	58	60	52	53	55	62	54
43.5	57	63	65	65	59	59	54	59	61	61	62	54	53	55	49	51	62	59	53	59	58	58	51	55	56	63	53
43.6	58	63	66	66	58	60	55	61	59	64	62	55	55	56	50	51	61	58	49	57	57	58	48	55	57	64	53
43.6	57	61	65	67	55	63	57	61	59	66	61	55	58	58	49	51	61	56	50	54	60	58	48	53	58	66	53
43.6	60	60	64	66	55	65	57	59	56	68	60	58	59	62	50	51	62	54	51	53	61	58	48	52	59	67	52
43.6	60	56	64	67	57	66	58	60	55	67	59	60	60	64	49	48	61	56	52	53	64	58	49	55	60	67	54
43.6	61	54	63	67	56	69	58	57	53	65	59	60	62	64	50	49	59	59	53	53	66	58	49	54	59	69	55
43.7	59	54	61	67	55	68	58	55	53	65	58	61	60	65	51	51	59	59	54	52	63	59	50	56	57	68	55
43.7	58	53	58	66	54	68	57	54	51	66	55	59	57	65	52	54	57	60	54	51	62	58	51	56	54	70	56
43.7	57	53	56	67	55	70	57	50	50	63	54	59	58	68	51	55	60	60	56	51	62	58	49	57	53	68	56
43.7	57	56	57	66	56	67	55	49	47	62	53	59	58	67	52	56	63	61	58	51	60	58	48	55	52	65	56
43.7	57	59	55	65	55	66	53	48	49	61	54	58	60	67	52	59	63	61	58	52	58	57	44	58	53	63	56
43.8	56	61	55	61	54	63	53	46	52	60	56	57	63	64	54	58	67	62	60	51	58	58	45	57	52	62	56
43.8	57	62	56	58	53	63	51	47	54	57	57	56	60	62	55	58	68	63	58	50	57	57	46	58	53	62	58
43.8	60	65	57	57	57	61	50	48	55	58	57	54	60	59	54	60	70	60	55	48	57	54	46	59	54	59	55
43.8	60	66	59	56	57	61	53	49	57	58	56	52	59	58	53	63	71	61	53	48	57	53	48	59	56	58	54
43.8	62	66	58	57	57	61	51	51	59	58	57	50	59	54	55	61	68	62	49	46	58	53	49	58	54	58	53
43.9	62	66	59	57	56	61	49	50	61	59	59	47	59	52	56	61	66	60	53	44	60	52	51	58	54	59	51
43.9	61	64	61	57	58	59	49	51	61	61	59	46	56	52	56	62	70	60	55	46	60	51	53	57	54	58	48
43.9	60	64	59	56	58	56	49	53	59	62	60	46	54	51	56	63	67	64	55	46	58	51	55	57	52	57	49
43.9	58	65	59	56	58	55	49	53	56	60	59	47	52	53	57	63	67	65	56	49	55	53	57	57	51	58	46
43.9	56	64	58	53	56	54	51	53	54	61	55	48	49	55	56	62	64	63	60	53	51	54	57	57	49	57	48
44	56	61	57	53	54	53	53	54	52	61	53	49	46	56	55	63	62	62	61	53	50	54	58	55	48	56	49
44	53	64	57	55	55	55	56	51	49	59	51	51	49	58	54	62	61	60	64	52	52	56	56	53	50	54	51
44	53	64	58	55	53	55	56	53	47	57	51	52	52	57	52	60	61	60	65	53	51	57	54	53	52	52	54
44	51	66	59	55	52	56	58	54	47	59	52	52	53	56	52	59	60	58	66	54	55	57	54	53	55	54	54
44	52	66	61	55	51	56	59	55	49	60	53	56	55	56	50	56	60	56	68	55	58	58	55	52	56	55	54
44.1	53	67	63	57	53	58	59	58	52	60	53	56	54	54	48	54	61	54	65	55	58	57	55	53	58	57	55
44.1	54	66	64	58	56	60	59	60	53	59	54	55	55	56	46	56	60	52	60	54	61	55	55	52	58	56	55
44.1	53	64	63	58	57	62	59	59	55	58	53	55	57	56	45	54	60	54	56	53	62	53	55	51	58	57	54
44.1	51	63	62	59	58	63	56	61	57	60	53	54	59	55	46	50	55	54	55	52	62	51	55	51	55	61	54
44.1	54	63	60	60	61	63	54	61	61	62	54	50	58	56	46	50	54	54	57	51	63	50	54	53	54	61	51
44.2	53	61	60	61	64	63	55	62	63	63	54	47	57	58	47	48	57	55	55	52	63	49	54	52	52	60	50
44.2	53	61	57	62	64	58	55	61	63	63	54	46	58	59	48	50	58	57	53	51	62	50	54	52	49	60	47
44.2	52	62	59	63	63	56	55	62	62	63	53	47	58	60	47	49	58	55	52	51	61	50	54	53	48	59	44
44.2	54	61	57	61	62	55	56	64	63	63	53	46	57	59	48	51	58	54	53	51	59	51	52	52	48	59	46
44.2	54	60	57	63	60	52	55	61	63	62	55	46	56	59	46	51	59	53	54	50	61	55	52	51	48	59	46
44.3	53	61	58	62	59	53	55	57	62	62	54	46	57	57	46	54	59	50	56	52	62	56	49	52	48	59	48
44.3	54	60	61	63	56	52	55	58	62	62	55	46	56	58	46	54	61	51	57	53	60	56	48	52	48	58	49
44.3	57	61	62	65	53	52	56	58	59	64	57	47	56	55	49	54	61	50	57	54	62	58	50	52	50	57	50
44.3	59	60	61	64	51	56	54	57	59	63	57	52	58	55	48	54	63	47	58	52	60	56	49	52	49	58	51
44.3	59	60	60	64	52	56	52	58	57	62	58	52	58	55	49	54	65	47	56	52	57	57	50	52	49	58	53
44.4	60	60	60	61	51	57	51	55	55	62	59	55	59	60	52	54	64	48	56	53	59	56	50	50	51	54	51
44.4	59	62	59	57	52	58	51	51	53	63	57	55	60	60	51	54	65	51	58	52	58	56	51	51	51	54	52
44.4	59	60	57	56	54	60	52	51	51	62	57	57	61	62	53	53	61	52	56	52	58	56	53	52	51	54	52
44.4	59	58	54	57	57	64	53	49	53	61	59	55	59	63	54	54	61	53	57	51	61	57	54	51	52	53	52
44.4	58	57	54	56	60	65	53	48	52	61	61	53	60	63	53	55	59	55	57	49	63	55	57	51	53	54	53
44.5	58	58	55	53	59	64	52	48	50	61	62	53	60	61	53	56	60	58	55	48	64	56	59	49	52	55	52
44.5	58	60	59	51	60	63	53	50	49	61	62	53	60	60	52	56	59	59	55	48	66	56	60	47	51	58	54
44.5	58	61	56	50	59	63	55	51	49	61	63	53	60	61	54	56	60	60	55	48	67	55	58	47	51	61	56
44.5	57	59	56	50	57	61	56	51	49	60	63	51	57	61	53	56	59	63	59	47	67	57	60	47	49	62	56
44.5	58	60	57	49	56	62	60	51	47	59	61	49	56	64	54	56	59	65	60	48	67	55	58	47	49	61	57
44.6	58	60	58	52	56	59	60	53	46	59	58	47	53	64	54	52	59	68	61	47	66	54	57	46	50	63	58
44.6	58	61	58	54	54	60	60	57	45	58	57	48	55	62	55	50	57	66	62	48	63	55	57	47	52	63	57
44.6	58	59	58	53	57	61	59	58	44	57	53	47	55	65	54	49	58	63	64	47	63	52	54	45	51	65	55
44.6	60	60	56	53	56	60	59	59	46	56	53	48	54	64	55	51	58	60	66	49	60	51	55	46	53	64	54
44.6	60	58	56	54	57	62	60	59	47	54	51	49	55	64	54	50	60	60	66	49	57	53	52	43	53	60	51
44.7	62	59	56	53	60	61	62	57	47	52	49	48	56	60	50	50	61	57	65	49	55	57	50	45	54	59	50
44.7	62	55	56	55	64	62	60	58	47	53	50	48	57	58	49	52	61	56	61	48	54	57	49	45	56	58	49
44.7	61	50	56	54	65	61	59	55	48	55	53	46	55	55	45	53	62	56	60	46	54	57	46	43	56	57	49
44.7	62	50	57	52	63	61	57	52	49	57	53	46	57	53	43	53	62	58	57	47	53	57	48	43	55	59	50
44.7	63	50	60	51	62	61	54	48	48	57	53	47	54	53	42	51	65	57	55	47	51	58	49	45	54	61	49
44.8	61	52	62	53	61	61	56	46	49	59	53	47	55	52	42	52	66	58	54	45	52	58	50	47	53	63	49
44.8	58	54	58	56	59	58	56	46	49	62	53	48	55	53	44	54	69	58	52	45	49	57	52	49	53	62	50
44.8	58	55	56	55	59	60	55	43	51	61	53	47	54	52	43	52	69	60	52	46	48	57	53	51	52	63	49
44.8	58	58	56	55	57	60	53	43	54	60	53	45	55	56	45	49	70	60	52	49	50	56	52	53	50	60	50
44.8	56	59	59	56	57	58	51	42	57	59	51	46	54	56	47	51	67	60	53	54	51	55	53	53	49	61	50
44.9	53	59	57	54	53	60	51	44	56	58	50	49	56	55	47	50	64	57	54	55	52	54	56	52	50	61	49
44.9	52	58	56	51	54	60	51	46	55	55	51	47	56	57	48	51	60	53	59	56	55	53	54	53	48	63	48
44.9	52	60	54	50	53	63	53	48	58	55	53	52	56	55	48	52	58	50	59	58	54	52	52	52	49	63	48
[truncated: 1,253 more rows]

## Sheet: FTIR scans
Wavenumber/cm-1	Dried									Immer-3									Immer-60
	CCB	CCB-R	CCB-N	CCB-S	CCB-RN	CCB-RS	CCB-Rn	CCB-RNn	CCB-RSn	CCB	CCB-R	CCB-N	CCB-S	CCB-RN	CCB-RS	CCB-Rn	CCB-RNn	CCB-RSn	CCB	CCB-R	CCB-N	CCB-S	CCB-RN	CCB-RS	CCB-Rn	CCB-RNn	CCB-RSn
399.67	0	0	0	0	0	0	0	0	0	0	0	0	0	0	0	0	0	0	0	0	0	0	0	0	0	0	0
400.16	0	0	0	0	0	0	0	0	0	0	0	0	0	0	0	0	0	0	0	0	0	0	0	0	0	0	0
400.64	0	0	0	0	0	0	0	0	0	0	0	0	0	0	0	0	0	0	0	0	0	0	0	0	0	0	0
401.12	84.55	73.81	79.86	68.01	81.12	78.29	79.91	66.65	77.41	81.31	63.9	74.87	76.09	54.73	76.01	74.76	73.23	66.11	83.04	63.85	69.17	71.32	71.42	67.43	64.81	77.73	81.3
401.6	84.46	73.78	79.82	67.64	81.11	78.01	79.87	66.65	77.22	81.11	64.03	74.88	75.99	54.97	76	74.97	73.23	66.11	82.91	63.78	69.11	71.28	71.23	67.79	64.63	77.54	81.39
402.09	84.37	73.75	79.78	67.27	81.1	77.74	79.83	66.65	77.03	80.92	64.17	74.89	75.89	55.2	75.99	75.18	73.22	66.1	82.79	63.71	69.04	71.24	71.04	68.15	64.45	77.35	81.47
402.57	84.29	73.73	79.75	66.89	81.09	77.48	79.79	66.67	76.85	80.72	64.3	74.9	75.78	55.43	75.98	75.42	73.23	66.11	82.67	63.65	68.98	71.21	70.85	68.55	64.27	77.18	81.57
403.05	84.18	73.69	79.7	66.53	81.08	77.2	79.74	66.66	76.66	80.53	64.43	74.9	75.68	55.67	75.97	75.61	73.2	66.1	82.54	63.58	68.92	71.17	70.66	68.87	64.08	76.97	81.65
403.53	83.98	73.64	79.62	66.17	81.05	76.85	79.68	66.53	76.44	80.36	64.55	74.88	75.6	55.96	75.96	75.68	73.04	66.05	82.41	63.5	68.84	71.09	70.47	68.97	63.86	76.68	81.7
404.01	83.72	73.57	79.52	65.8	81.02	76.48	79.6	66.34	76.22	80.21	64.63	74.84	75.5	56.23	75.94	75.63	72.83	65.97	82.29	63.37	68.74	71	70.3	68.97	63.62	76.35	81.72
404.5	83.43	73.48	79.4	65.42	80.97	76.13	79.52	66.12	76	80.07	64.67	74.79	75.39	56.45	75.89	75.46	72.6	65.86	82.15	63.17	68.62	70.91	70.15	68.9	63.35	75.99	81.71
404.98	83.08	73.37	79.27	65.01	80.9	75.83	79.42	65.87	75.79	79.94	64.62	74.7	75.22	56.56	75.81	75.08	72.37	65.7	82.02	62.84	68.46	70.81	70.04	68.77	63.05	75.61	81.62
405.46	82.65	73.23	79.11	64.53	80.79	75.64	79.3	65.6	75.63	79.84	64.38	74.58	74.95	56.45	75.65	74.33	72.18	65.47	81.89	62.26	68.2	70.72	70.01	68.57	62.68	75.2	81.41
405.94	82.18	73.07	78.93	64.02	80.67	75.51	79.17	65.31	75.49	79.75	64.06	74.42	74.64	56.22	75.46	73.4	72.01	65.18	81.76	61.55	67.91	70.62	70.01	68.32	62.29	74.78	81.15
406.42	81.71	72.9	78.76	63.5	80.54	75.4	79.03	65.02	75.35	79.65	63.71	74.24	74.32	55.94	75.26	72.39	71.83	64.86	81.62	60.8	67.6	70.51	70.02	68.05	61.88	74.37	80.87
406.91	81.28	72.74	78.59	62.97	80.4	75.28	78.9	64.73	75.21	79.52	63.39	74.03	74.01	55.63	75.05	71.36	71.65	64.48	81.48	60.05	67.31	70.38	70.01	67.79	61.48	73.99	80.61
407.39	80.94	72.59	78.46	62.45	80.27	75.13	78.78	64.46	75.04	79.32	63.18	73.77	73.75	55.37	74.88	70.38	71.46	64.02	81.31	59.37	67.11	70.2	69.94	67.6	61.1	73.67	80.43
407.87	80.65	72.45	78.35	61.93	80.13	74.98	78.67	64.2	74.87	79.1	63.01	73.49	73.52	55.12	74.7	69.46	71.26	63.54	81.13	58.73	66.92	70	69.84	67.41	60.73	73.4	80.29
408.35	80.41	72.32	78.24	61.42	80.01	74.83	78.57	63.94	74.71	78.89	62.84	73.21	73.3	54.86	74.52	68.6	71.05	63.05	80.96	58.13	66.72	69.76	69.74	67.21	60.39	73.15	80.17
408.84	80.22	72.21	78.12	60.9	79.91	74.71	78.48	63.69	74.57	78.69	62.65	72.94	73.11	54.59	74.34	67.87	70.83	62.6	80.82	57.6	66.47	69.47	69.64	66.96	60.11	72.94	80.05
409.32	80.11	72.13	78	60.39	79.87	74.65	78.43	63.46	74.49	78.54	62.4	72.71	72.96	54.34	74.13	67.4	70.57	62.22	80.73	57.19	66.11	69.08	69.55	66.6	59.95	72.75	79.93
409.8	80.05	72.07	77.86	59.88	79.84	74.6	78.39	63.23	74.42	78.42	62.13	72.5	72.83	54.08	73.91	67.08	70.31	61.89	80.66	56.86	65.72	68.66	69.47	66.2	59.83	72.59	79.81
410.28	80.02	72.01	77.71	59.39	79.83	74.56	78.34	62.99	74.36	78.32	61.86	72.3	72.7	53.82	73.68	66.83	70.04	61.6	80.59	56.55	65.31	68.24	69.38	65.78	59.72	72.45	79.69
410.76	80	71.94	77.55	58.92	79.8	74.53	78.27	62.72	74.27	78.25	61.59	72.11	72.58	53.54	73.46	66.63	69.79	61.37	80.49	56.25	64.91	67.87	69.29	65.35	59.6	72.31	79.58
411.25	79.98	71.85	77.34	58.5	79.75	74.48	78.18	62.4	74.11	78.21	61.34	71.93	72.45	53.22	73.23	66.45	69.59	61.25	80.33	55.9	64.59	67.63	69.2	64.97	59.4	72.18	79.49
411.73	79.95	71.73	77.13	58.1	79.69	74.43	78.06	62.05	73.92	78.19	61.1	71.74	72.32	52.88	73.01	66.28	69.4	61.17	80.14	55.55	64.3	67.45	69.1	64.59	59.16	72.04	79.39
412.21	79.93	71.6	76.9	57.7	79.62	74.37	77.92	61.7	73.73	78.17	60.86	71.55	72.18	52.56	72.78	66.14	69.22	61.11	79.94	55.2	64	67.29	68.98	64.23	58.91	71.91	79.28
412.69	79.89	71.46	76.67	57.29	79.53	74.29	77.76	61.38	73.55	78.13	60.64	71.34	72.02	52.26	72.55	66	69.05	61.01	79.73	54.88	63.68	67.13	68.85	63.88	58.62	71.76	79.16
413.17	79.82	71.29	76.44	56.8	79.42	74.18	77.56	61.12	73.42	78.02	60.44	71.09	71.84	52.01	72.32	65.81	68.89	60.82	79.51	54.6	63.29	66.95	68.67	63.56	58.26	71.59	79.01
413.66	79.73	71.11	76.22	56.3	79.3	74.05	77.34	60.89	73.31	77.89	60.25	70.82	71.65	51.79	72.09	65.62	68.73	60.58	79.29	54.35	62.89	66.77	68.47	63.25	57.9	71.41	78.84
414.14	79.63	70.92	76	55.82	79.17	73.92	77.12	60.66	73.21	77.75	60.06	70.54	71.45	51.59	71.86	65.44	68.58	60.34	79.07	54.1	62.49	66.59	68.26	62.95	57.53	71.22	78.66
414.62	79.53	70.73	75.79	55.41	79.01	73.79	76.91	60.44	73.09	77.61	59.87	70.27	71.25	51.4	71.62	65.29	68.43	60.1	78.86	53.86	62.11	66.41	68.05	62.67	57.2	71.02	78.48
415.1	79.42	70.54	75.61	55.11	78.84	73.66	76.72	60.2	72.94	77.48	59.67	70.01	71.05	51.21	71.38	65.22	68.27	59.89	78.67	53.61	61.81	66.26	67.85	62.4	56.95	70.82	78.31
415.58	79.31	70.36	75.44	54.89	78.65	73.54	76.55	59.96	72.78	77.34	59.45	69.77	70.86	51.02	71.14	65.17	68.1	59.68	78.49	53.36	61.55	66.11	67.65	62.15	56.75	70.6	78.13
416.07	79.19	70.17	75.28	54.72	78.45	73.41	76.39	59.72	72.62	77.2	59.24	69.53	70.67	50.84	70.9	65.14	67.94	59.48	78.32	53.11	61.29	65.95	67.46	61.89	56.56	70.39	77.95
416.55	79.07	69.98	75.1	54.59	78.26	73.27	76.23	59.48	72.44	77.06	59.01	69.31	70.49	50.66	70.66	65.08	67.76	59.29	78.15	52.87	61.04	65.77	67.27	61.63	56.39	70.17	77.76
417.03	78.94	69.8	74.89	54.5	78.07	73.11	76.07	59.25	72.27	76.9	58.78	69.09	70.33	50.46	70.45	64.96	67.57	59.11	77.99	52.65	60.75	65.52	67.09	61.35	56.21	69.96	77.55
417.51	78.81	69.62	74.67	54.45	77.89	72.94	75.91	59.03	72.09	76.74	58.54	68.89	70.17	50.26	70.24	64.82	67.38	58.93	77.83	52.44	60.46	65.26	66.92	61.07	56.03	69.75	77.34
418	78.67	69.45	74.45	54.42	77.71	72.76	75.76	58.81	71.91	76.58	58.31	68.68	70.02	50.07	70.04	64.67	67.18	58.76	77.68	52.23	60.17	64.99	66.75	60.78	55.85	69.54	77.13
418.48	78.54	69.27	74.24	54.41	77.54	72.58	75.61	58.61	71.74	76.41	58.09	68.48	69.87	49.88	69.84	64.51	66.98	58.57	77.52	52.01	59.89	64.72	66.58	60.5	55.66	69.33	76.92
418.96	78.42	69.08	74.06	54.39	77.39	72.41	75.47	58.41	71.6	76.25	57.9	68.27	69.72	49.72	69.67	64.37	66.79	58.38	77.36	51.78	59.62	64.5	66.41	60.22	55.42	69.13	76.72
419.44	78.3	68.89	73.9	54.38	77.24	72.25	75.33	58.22	71.46	76.09	57.71	68.06	69.57	49.57	69.49	64.22	66.6	58.18	77.19	51.54	59.36	64.29	66.25	59.95	55.17	68.93	76.53
419.92	78.18	68.7	73.74	54.37	77.09	72.09	75.19	58.04	71.33	75.93	57.53	67.85	69.42	49.42	69.33	64.08	66.4	57.98	77.03	51.3	59.11	64.09	66.08	59.69	54.91	68.73	76.33
420.41	78.07	68.52	73.57	54.37	76.94	71.93	75.05	57.86	71.19	75.77	57.36	67.64	69.27	49.28	69.16	63.93	66.2	57.77	76.86	51.08	58.85	63.88	65.9	59.44	54.65	68.53	76.14
420.89	77.95	68.34	73.37	54.39	76.8	71.76	74.9	57.68	71.03	75.61	57.17	67.42	69.11	49.14	69.01	63.77	66	57.56	76.7	50.88	58.57	63.65	65.7	59.2	54.41	68.33	75.94
421.37	77.84	68.16	73.16	54.41	76.65	71.6	74.75	57.5	70.86	75.45	56.97	67.2	68.94	49	68.85	63.62	65.79	57.36	76.53	50.7	58.3	63.43	65.49	58.96	54.18	68.12	75.73
421.85	77.73	67.98	72.95	54.42	76.51	71.44	74.6	57.33	70.69	75.28	56.78	66.98	68.77	48.85	68.69	63.46	65.58	57.15	76.36	50.51	58.02	63.2	65.27	58.74	53.95	67.91	75.53
422.33	77.61	67.81	72.74	54.39	76.36	71.28	74.45	57.17	70.52	75.12	56.58	66.77	68.6	48.7	68.53	63.29	65.36	56.95	76.2	50.33	57.76	62.97	65.06	58.51	53.74	67.69	75.32
422.82	77.49	67.64	72.54	54.3	76.2	71.12	74.29	57.01	70.37	74.96	56.37	66.58	68.42	48.55	68.35	63.13	65.12	56.75	76.03	50.14	57.52	62.75	64.86	58.28	53.54	67.48	75.12
423.3	77.38	67.48	72.34	54.18	76.03	70.97	74.14	56.85	70.23	74.79	56.16	66.41	68.25	48.38	68.17	62.96	64.88	56.56	75.86	49.94	57.28	62.52	64.65	58.05	53.34	67.26	74.91
423.78	77.26	67.32	72.13	54.05	75.87	70.82	73.98	56.7	70.1	74.63	55.95	66.23	68.07	48.21	67.98	62.79	64.63	56.37	75.69	49.74	57.05	62.3	64.45	57.81	53.15	67.04	74.71
424.26	77.14	67.16	71.93	53.92	75.7	70.67	73.82	56.53	69.96	74.47	55.73	66.05	67.9	48.03	67.78	62.6	64.39	56.18	75.52	49.53	56.8	62.07	64.25	57.56	52.96	66.82	74.5
424.74	77.02	66.97	71.72	53.81	75.53	70.53	73.66	56.35	69.81	74.31	55.5	65.85	67.74	47.82	67.59	62.39	64.16	55.98	75.35	49.3	56.53	61.84	64.06	57.29	52.76	66.61	74.29
425.23	76.91	66.79	71.51	53.71	75.37	70.39	73.5	56.16	69.66	74.15	55.27	65.64	67.58	47.6	67.39	62.18	63.93	55.78	75.18	49.06	56.25	61.61	63.88	57	52.56	66.4	74.07
425.71	76.79	66.6	71.31	53.61	75.2	70.25	73.35	55.97	69.51	74	55.03	65.43	67.42	47.37	67.19	61.96	63.7	55.57	75.01	48.82	55.97	61.38	63.69	56.72	52.36	66.2	73.85
426.19	76.69	66.41	71.1	53.51	75.03	70.11	73.19	55.78	69.36	73.84	54.81	65.22	67.26	47.16	66.99	61.77	63.48	55.37	74.85	48.58	55.7	61.15	63.49	56.45	52.16	65.99	73.64
426.67	76.59	66.22	70.91	53.41	74.86	69.97	73.03	55.61	69.21	73.67	54.59	65.02	67.11	46.96	66.8	61.61	63.27	55.16	74.68	48.35	55.44	60.92	63.29	56.21	51.96	65.8	73.43
427.16	76.5	66.03	70.73	53.31	74.7	69.83	72.87	55.44	69.06	73.5	54.37	64.81	66.96	46.77	66.61	61.47	63.06	54.96	74.52	48.14	55.18	60.69	63.08	55.99	51.75	65.6	73.22
427.64	76.41	65.83	70.55	53.21	74.53	69.68	72.72	55.28	68.91	73.34	54.16	64.61	66.8	46.59	66.43	61.35	62.85	54.76	74.36	47.92	54.93	60.47	62.86	55.77	51.55	65.41	73.01
428.12	76.31	65.64	70.37	53.13	74.36	69.53	72.56	55.13	68.76	73.17	53.96	64.41	66.65	46.42	66.25	61.23	62.63	54.56	74.2	47.72	54.69	60.25	62.65	55.56	51.35	65.21	72.8
428.6	76.22	65.46	70.2	53.05	74.19	69.38	72.39	54.98	68.61	73	53.77	64.22	66.5	46.24	66.07	61.12	62.41	54.38	74.03	47.54	54.45	60.03	62.42	55.35	51.15	65.02	72.6
429.08	76.12	65.27	70.04	52.99	74.03	69.21	72.23	54.84	68.45	72.83	53.58	64.04	66.35	46.07	65.89	61.01	62.17	54.2	73.86	47.37	54.22	59.82	62.2	55.14	50.94	64.82	72.4
429.57	76.02	65.09	69.87	52.93	73.86	69.04	72.07	54.7	68.29	72.66	53.4	63.86	66.21	45.91	65.72	60.9	61.94	54.02	73.7	47.2	54	59.6	61.97	54.93	50.74	64.61	72.21
430.05	75.9	64.9	69.7	52.88	73.68	68.87	71.9	54.55	68.14	72.49	53.21	63.68	66.06	45.74	65.54	60.79	61.69	53.84	73.53	47.03	53.77	59.38	61.74	54.72	50.53	64.41	72.01
430.53	75.77	64.7	69.52	52.83	73.51	68.69	71.74	54.38	67.98	72.32	53.02	63.5	65.9	45.58	65.37	60.65	61.43	53.65	73.36	46.85	53.52	59.15	61.5	54.5	50.32	64.19	71.8
431.01	75.63	64.5	69.32	52.78	73.33	68.5	71.58	54.21	67.81	72.15	52.83	63.32	65.75	45.42	65.19	60.5	61.17	53.45	73.19	46.67	53.28	58.91	61.26	54.27	50.1	63.97	71.59
431.49	75.48	64.3	69.14	52.72	73.16	68.31	71.41	54.03	67.66	71.98	52.64	63.14	65.59	45.26	65.02	60.34	60.91	53.26	73.02	46.48	53.03	58.67	61.02	54.05	49.88	63.75	71.38
431.98	75.33	64.11	68.95	52.67	72.99	68.12	71.25	53.86	67.5	71.82	52.45	62.97	65.43	45.1	64.84	60.17	60.66	53.07	72.85	46.29	52.79	58.44	60.79	53.83	49.67	63.52	71.17
432.46	75.18	63.91	68.77	52.6	72.81	67.94	71.09	53.7	67.36	71.66	52.25	62.8	65.28	44.95	64.67	59.99	60.42	52.88	72.68	46.09	52.56	58.22	60.58	53.63	49.46	63.31	70.96
432.94	75.03	63.72	68.59	52.53	72.65	67.77	70.94	53.55	67.22	71.5	52.05	62.64	65.13	44.81	64.5	59.79	60.2	52.7	72.51	45.88	52.33	58.01	60.37	53.45	49.26	63.1	70.74
433.42	74.87	63.52	68.43	52.45	72.48	67.61	70.79	53.4	67.08	71.34	51.85	62.48	64.97	44.66	64.32	59.58	59.98	52.52	72.35	45.67	52.11	57.81	60.17	53.27	49.06	62.89	70.53
433.91	74.72	63.33	68.26	52.37	72.31	67.44	70.64	53.26	66.94	71.18	51.66	62.32	64.82	44.5	64.15	59.36	59.77	52.34	72.18	45.46	51.89	57.62	59.97	53.09	48.86	62.68	70.32
434.39	74.57	63.14	68.11	52.26	72.14	67.29	70.5	53.12	66.8	71.03	51.47	62.17	64.67	44.31	63.98	59.12	59.56	52.16	72.02	45.23	51.67	57.43	59.79	52.92	48.67	62.47	70.11
434.87	74.43	62.95	67.97	52.15	71.96	67.13	70.35	52.99	66.66	70.88	51.28	62.01	64.52	44.12	63.81	58.88	59.36	51.97	71.86	45	51.45	57.25	59.61	52.75	48.48	62.27	69.91
435.35	74.28	62.77	67.83	52.04	71.79	66.98	70.21	52.85	66.52	70.73	51.09	61.86	64.37	43.93	63.65	58.62	59.16	51.78	71.7	44.78	51.24	57.07	59.44	52.59	48.29	62.07	69.71
435.83	74.15	62.59	67.69	51.93	71.63	66.83	70.07	52.72	66.38	70.58	50.92	61.71	64.22	43.75	63.49	58.37	58.97	51.59	71.55	44.56	51.05	56.9	59.27	52.43	48.11	61.88	69.52
436.32	74.01	62.43	67.55	51.83	71.47	66.68	69.94	52.59	66.24	70.43	50.75	61.56	64.08	43.6	63.33	58.12	58.78	51.4	71.41	44.36	50.87	56.74	59.1	52.27	47.94	61.69	69.33
436.8	73.87	62.27	67.41	51.74	71.33	66.52	69.81	52.46	66.11	70.29	50.59	61.41	63.94	43.45	63.19	57.87	58.6	51.21	71.27	44.18	50.71	56.58	58.93	52.13	47.77	61.51	69.16
437.28	73.74	62.12	67.27	51.65	71.18	66.37	69.68	52.33	65.98	70.15	50.44	61.26	63.81	43.31	63.04	57.62	58.41	51.02	71.13	44	50.55	56.42	58.77	51.98	47.6	61.33	68.98
437.76	73.62	61.97	67.15	51.55	71.05	66.22	69.56	52.2	65.86	70.01	50.28	61.11	63.67	43.16	62.9	57.38	58.23	50.82	71	43.83	50.39	56.25	58.61	51.83	47.45	61.16	68.82
438.24	73.49	61.82	67.03	51.45	70.93	66.07	69.43	52.06	65.74	69.86	50.11	60.95	63.53	43.01	62.76	57.14	58.04	50.63	70.87	43.66	50.23	56.07	58.44	51.67	47.29	60.98	68.65
438.73	73.37	61.67	66.91	51.35	70.81	65.93	69.32	51.92	65.62	69.73	49.93	60.79	63.4	42.86	62.62	56.91	57.85	50.44	70.75	43.51	50.06	55.88	58.27	51.52	47.15	60.81	68.48
439.21	73.25	61.53	66.8	51.25	70.7	65.79	69.2	51.78	65.5	69.59	49.76	60.65	63.27	42.72	62.48	56.69	57.66	50.25	70.62	43.36	49.9	55.69	58.11	51.36	47.01	60.64	68.31
439.69	73.14	61.4	66.69	51.15	70.59	65.66	69.1	51.64	65.4	69.47	49.59	60.5	63.14	42.57	62.35	56.48	57.47	50.07	70.51	43.22	49.72	55.5	57.96	51.21	46.89	60.48	68.16
440.17	73.04	61.28	66.59	51.07	70.49	65.54	69	51.53	65.29	69.36	49.42	60.38	63.03	42.43	62.23	56.29	57.29	49.91	70.4	43.08	49.54	55.31	57.82	51.06	46.79	60.34	68.01
440.65	72.95	61.17	66.48	51	70.39	65.44	68.91	51.41	65.2	69.26	49.26	60.26	62.92	42.29	62.11	56.12	57.12	49.76	70.3	42.96	49.35	55.13	57.7	50.92	46.7	60.21	67.86
441.14	72.87	61.06	66.38	50.92	70.3	65.35	68.82	51.3	65.1	69.17	49.11	60.16	62.81	42.16	62	55.95	56.96	49.62	70.2	42.84	49.17	54.96	57.58	50.78	46.61	60.08	67.73
441.62	72.79	60.95	66.27	50.84	70.22	65.27	68.73	51.19	65.01	69.09	48.96	60.06	62.72	42.03	61.89	55.8	56.81	49.49	70.1	42.72	48.98	54.8	57.48	50.64	46.52	59.96	67.6
442.1	72.72	60.85	66.15	50.73	70.14	65.19	68.64	51.07	64.92	69.02	48.82	59.97	62.62	41.92	61.78	55.66	56.67	49.37	70.01	42.59	48.79	54.65	57.38	50.5	46.42	59.85	67.48
442.58	72.66	60.74	66.02	50.62	70.06	65.12	68.56	50.93	64.83	68.95	48.69	59.89	62.54	41.81	61.68	55.53	56.54	49.27	69.91	42.46	48.61	54.53	57.28	50.35	46.3	59.75	67.38
443.07	72.6	60.64	65.9	50.51	69.99	65.06	68.48	50.81	64.74	68.89	48.57	59.81	62.46	41.7	61.58	55.4	56.43	49.17	69.82	42.33	48.44	54.41	57.19	50.21	46.19	59.65	67.28
443.55	72.55	60.55	65.78	50.39	69.92	65	68.39	50.68	64.65	68.84	48.45	59.73	62.38	41.59	61.48	55.28	56.32	49.08	69.72	42.2	48.29	54.31	57.1	50.08	46.08	59.56	67.18
444.03	72.48	60.46	65.7	50.29	69.85	64.93	68.31	50.56	64.56	68.78	48.35	59.66	62.31	41.48	61.39	55.15	56.21	49.01	69.62	42.08	48.18	54.22	57.01	49.97	45.97	59.46	67.09
444.51	72.41	60.37	65.63	50.19	69.78	64.87	68.24	50.45	64.48	68.73	48.25	59.58	62.24	41.38	61.31	55.03	56.11	48.95	69.52	41.96	48.09	54.14	56.91	49.87	45.87	59.37	67.01
444.99	72.35	60.29	65.56	50.09	69.72	64.81	68.16	50.35	64.39	68.68	48.15	59.5	62.17	41.27	61.23	54.91	56.02	48.89	69.42	41.85	48	54.07	56.83	49.78	45.76	59.27	66.93
445.48	72.28	60.22	65.5	49.99	69.66	64.75	68.08	50.25	64.32	68.63	48.06	59.43	62.1	41.17	61.15	54.78	55.94	48.83	69.32	41.74	47.92	54.01	56.74	49.69	45.66	59.19	66.85
445.96	72.22	60.15	65.44	49.87	69.6	64.7	68	50.15	64.25	68.58	47.97	59.35	62.04	41.06	61.07	54.65	55.86	48.76	69.23	41.63	47.82	53.93	56.65	49.62	45.56	59.1	66.77
446.44	72.16	60.09	65.37	49.76	69.54	64.65	67.93	50.06	64.19	68.54	47.88	59.27	61.97	40.96	61	54.52	55.78	48.67	69.15	41.53	47.71	53.86	56.56	49.54	45.46	59.02	66.68
446.92	72.11	60.03	65.32	49.64	69.49	64.6	67.85	49.97	64.13	68.49	47.8	59.19	61.9	40.86	60.93	54.39	55.71	48.59	69.07	41.43	47.61	53.8	56.48	49.48	45.36	58.94	66.6
447.4	72.06	59.98	65.27	49.53	69.44	64.57	67.79	49.9	64.09	68.45	47.73	59.12	61.84	40.79	60.87	54.27	55.65	48.51	69	41.35	47.51	53.75	56.4	49.43	45.27	58.86	66.53
447.89	72.02	59.93	65.24	49.42	69.41	64.54	67.72	49.85	64.06	68.41	47.69	59.06	61.79	40.75	60.82	54.16	55.61	48.43	68.93	41.3	47.42	53.71	56.34	49.39	45.2	58.8	66.46
448.37	71.99	59.89	65.23	49.32	69.38	64.53	67.67	49.81	64.04	68.38	47.66	59.01	61.74	40.73	60.77	54.07	55.57	48.36	68.88	41.26	47.33	53.68	56.28	49.36	45.13	58.74	66.41
448.85	71.97	59.86	65.22	49.24	69.35	64.52	67.62	49.78	64.03	68.35	47.63	58.96	61.71	40.73	60.73	53.98	55.55	48.28	68.83	41.22	47.25	53.66	56.22	49.33	45.08	58.68	66.35
449.33	71.94	59.83	65.22	49.18	69.33	64.51	67.57	49.75	64.01	68.32	47.62	58.92	61.67	40.72	60.69	53.91	55.52	48.21	68.79	41.19	47.18	53.65	56.18	49.31	45.03	58.63	66.31
449.81	71.92	59.81	65.23	49.14	69.31	64.5	67.54	49.71	64	68.3	47.6	58.88	61.64	40.7	60.65	53.86	55.5	48.15	68.76	41.15	47.11	53.64	56.14	49.28	45	58.58	66.27
450.3	71.91	59.79	65.25	49.13	69.29	64.49	67.51	49.68	63.98	68.28	47.58	58.85	61.62	40.68	60.61	53.83	55.48	48.09	68.74	41.12	47.06	53.64	56.1	49.26	44.97	58.54	66.24
450.78	71.89	59.78	65.28	49.13	69.27	64.49	67.49	49.66	63.96	68.27	47.57	58.83	61.61	40.66	60.58	53.81	55.47	48.04	68.72	41.09	47.01	53.65	56.08	49.24	44.96	58.5	66.21
451.26	71.88	59.78	65.32	49.15	69.26	64.49	67.48	49.64	63.95	68.27	47.56	58.82	61.6	40.64	60.56	53.8	55.47	48.01	68.71	41.08	46.98	53.66	56.06	49.22	44.96	58.47	66.19
451.74	71.88	59.79	65.35	49.19	69.25	64.51	67.47	49.62	63.94	68.27	47.56	58.82	61.61	40.63	60.54	53.81	55.48	48	68.71	41.07	46.97	53.68	56.07	49.22	44.98	58.45	66.19
452.23	71.87	59.81	65.39	49.24	69.25	64.53	67.48	49.6	63.94	68.29	47.56	58.83	61.62	40.61	60.53	53.83	55.49	48	68.72	41.07	46.98	53.71	56.08	49.23	45.02	58.45	66.19
452.71	71.87	59.84	65.44	49.3	69.25	64.55	67.48	49.59	63.94	68.31	47.56	58.84	61.64	40.6	60.52	53.85	55.52	48.02	68.74	41.09	46.99	53.74	56.1	49.24	45.06	58.45	66.19
453.19	71.87	59.87	65.48	49.37	69.26	64.58	67.5	49.59	63.94	68.33	47.57	58.86	61.66	40.59	60.52	53.88	55.55	48.03	68.76	41.11	47.01	53.76	56.13	49.26	45.11	58.46	66.2
453.67	71.88	59.91	65.54	49.44	69.28	64.61	67.51	49.59	63.95	68.36	47.56	58.89	61.69	40.58	60.53	53.9	55.58	48.05	68.78	41.14	47.04	53.78	56.16	49.27	45.15	58.47	66.21
454.15	71.89	59.95	65.59	49.52	69.3	64.64	67.52	49.6	63.97	68.39	47.56	58.92	61.71	40.57	60.55	53.92	55.62	48.08	68.81	41.17	47.08	53.8	56.19	49.29	45.2	58.5	66.22
454.64	71.91	59.99	65.65	49.61	69.33	64.67	67.55	49.62	63.99	68.43	47.57	58.96	61.75	40.58	60.57	53.94	55.66	48.11	68.85	41.22	47.11	53.83	56.23	49.31	45.25	58.52	66.24
455.12	71.93	60.04	65.72	49.7	69.37	64.71	67.58	49.65	64.02	68.46	47.58	59	61.79	40.59	60.61	53.97	55.71	48.14	68.89	41.28	47.16	53.86	56.27	49.34	45.3	58.56	66.26
455.6	71.96	60.09	65.79	49.8	69.42	64.75	67.61	49.69	64.05	68.51	47.62	59.05	61.83	40.63	60.65	54	55.77	48.17	68.94	41.35	47.2	53.89	56.32	49.38	45.36	58.6	66.28
456.08	71.99	60.15	65.87	49.91	69.47	64.79	67.66	49.75	64.1	68.56	47.67	59.11	61.89	40.69	60.71	54.03	55.84	48.21	68.99	41.44	47.25	53.94	56.38	49.44	45.43	58.65	66.3
456.56	72.03	60.22	65.95	50.03	69.53	64.84	67.71	49.8	64.15	68.61	47.73	59.17	61.94	40.75	60.77	54.07	55.91	48.26	69.05	41.53	47.31	54	56.44	49.51	45.5	58.7	66.32
457.05	72.07	60.29	66.03	50.14	69.59	64.89	67.77	49.87	64.21	68.66	47.8	59.24	62.01	40.83	60.84	54.12	55.98	48.3	69.11	41.61	47.37	54.06	56.5	49.58	45.57	58.75	66.35
457.53	72.11	60.36	66.11	50.26	69.66	64.94	67.83	49.92	64.28	68.72	47.87	59.3	62.08	40.91	60.91	54.18	56.06	48.34	69.17	41.69	47.44	54.14	56.57	49.66	45.63	58.8	66.39
458.01	72.17	60.43	66.2	50.38	69.72	65	67.89	49.98	64.36	68.78	47.96	59.37	62.15	41	60.99	54.24	56.14	48.39	69.24	41.77	47.52	54.22	56.65	49.75	45.7	58.86	66.43
458.49	72.22	60.51	66.29	50.5	69.79	65.06	67.96	50.04	64.44	68.85	48.06	59.44	62.22	41.09	61.07	54.32	56.22	48.44	69.3	41.86	47.6	54.32	56.73	49.84	45.76	58.92	66.48
458.98	72.28	60.6	66.39	50.63	69.87	65.14	68.03	50.12	64.52	68.92	48.16	59.52	62.31	41.2	61.16	54.41	56.31	48.5	69.37	41.95	47.7	54.43	56.82	49.95	45.84	58.98	66.53
459.46	72.36	60.7	66.5	50.78	69.95	65.23	68.11	50.21	64.62	69	48.27	59.61	62.4	41.32	61.26	54.52	56.41	48.58	69.45	42.06	47.83	54.55	56.93	50.07	45.92	59.06	66.6
459.94	72.44	60.81	66.61	50.94	70.04	65.32	68.2	50.32	64.73	69.09	48.4	59.7	62.49	41.45	61.37	54.65	56.52	48.66	69.53	42.18	47.96	54.68	57.04	50.2	46.02	59.15	66.68
460.42	72.52	60.93	66.72	51.1	70.14	65.43	68.29	50.44	64.84	69.18	48.52	59.8	62.59	41.59	61.49	54.79	56.63	48.76	69.61	42.3	48.1	54.82	57.17	50.33	46.11	59.24	66.76
460.9	72.61	61.06	66.83	51.27	70.24	65.53	68.38	50.57	64.95	69.27	48.65	59.9	62.69	41.72	61.61	54.94	56.74	48.85	69.7	42.43	48.25	54.96	57.29	50.47	46.22	59.33	66.85
461.39	72.7	61.18	66.94	51.43	70.33	65.64	68.47	50.69	65.05	69.37	48.78	60	62.79	41.85	61.73	55.09	56.84	48.94	69.79	42.56	48.38	55.09	57.42	50.6	46.32	59.43	66.93
461.87	72.79	61.31	67.04	51.6	70.44	65.74	68.57	50.81	65.15	69.46	48.91	60.1	62.89	41.99	61.85	55.24	56.95	49.03	69.89	42.7	48.51	55.23	57.55	50.74	46.43	59.53	67.02
462.35	72.89	61.45	67.15	51.77	70.54	65.85	68.67	50.94	65.25	69.57	49.04	60.2	63	42.12	61.97	55.39	57.06	49.12	69.99	42.84	48.65	55.36	57.68	50.87	46.54	59.63	67.12
462.83	72.99	61.58	67.25	51.94	70.65	65.97	68.78	51.08	65.35	69.67	49.18	60.31	63.11	42.27	62.1	55.55	57.18	49.23	70.1	43	48.79	55.5	57.82	51.01	46.67	59.74	67.21
463.31	73.09	61.73	67.36	52.12	70.76	66.09	68.89	51.24	65.47	69.78	49.33	60.42	63.22	42.44	62.23	55.73	57.31	49.34	70.21	43.17	48.94	55.65	57.95	51.17	46.82	59.86	67.32
463.8	73.19	61.88	67.47	52.3	70.88	66.23	69	51.4	65.58	69.9	49.48	60.55	63.35	42.61	62.37	55.9	57.44	49.47	70.33	43.35	49.09	55.8	58.09	51.33	46.98	59.98	67.43
464.28	73.3	62.03	67.59	52.47	71	66.36	69.12	51.58	65.71	70.02	49.64	60.68	63.47	42.8	62.5	56.08	57.58	49.6	70.45	43.54	49.25	55.96	58.23	51.49	47.15	60.11	67.54
464.76	73.4	62.19	67.71	52.65	71.12	66.5	69.24	51.75	65.83	70.14	49.8	60.81	63.6	42.98	62.64	56.27	57.73	49.74	70.57	43.72	49.42	56.12	58.37	51.65	47.32	60.23	67.65
465.24	73.51	62.34	67.82	52.8	71.23	66.65	69.36	51.93	65.96	70.26	49.96	60.95	63.73	43.16	62.77	56.46	57.87	49.88	70.7	43.89	49.59	56.28	58.51	51.8	47.49	60.36	67.76
465.72	73.61	62.49	67.95	52.95	71.35	66.8	69.48	52.12	66.09	70.39	50.11	61.1	63.85	43.34	62.9	56.66	58.01	50.02	70.83	44.06	49.76	56.43	58.66	51.94	47.67	60.5	67.87
466.21	73.72	62.65	68.07	53.1	71.47	66.95	69.6	52.31	66.22	70.51	50.27	61.25	63.98	43.52	63.04	56.85	58.16	50.17	70.96	44.23	49.95	56.59	58.81	52.09	47.85	60.63	67.99
466.69	73.83	62.81	68.21	53.26	71.59	67.1	69.72	52.5	66.36	70.64	50.44	61.4	64.11	43.71	63.17	57.05	58.31	50.33	71.09	44.4	50.13	56.76	58.96	52.25	48.04	60.77	68.11
467.17	73.94	62.98	68.35	53.42	71.72	67.26	69.85	52.71	66.52	70.77	50.62	61.57	64.25	43.91	63.31	57.26	58.47	50.5	71.22	44.58	50.34	56.94	59.13	52.42	48.23	60.91	68.23
467.65	74.06	63.15	68.5	53.59	71.86	67.41	69.98	52.91	66.67	70.9	50.8	61.74	64.39	44.11	63.46	57.47	58.62	50.67	71.36	44.77	50.55	57.12	59.31	52.6	48.42	61.05	68.37
468.14	74.18	63.32	68.65	53.77	71.99	67.57	70.11	53.12	66.83	71.03	50.99	61.91	64.54	44.32	63.61	57.67	58.78	50.85	71.5	44.96	50.76	57.31	59.49	52.78	48.62	61.2	68.5
468.62	74.3	63.5	68.8	53.95	72.13	67.72	70.24	53.34	66.99	71.16	51.18	62.08	64.69	44.52	63.76	57.87	58.94	51.03	71.63	45.14	50.97	57.51	59.67	52.97	48.81	61.35	68.64
469.1	74.43	63.67	68.95	54.13	72.27	67.88	70.38	53.54	67.14	71.29	51.37	62.24	64.85	44.71	63.91	58.06	59.1	51.21	71.77	45.31	51.18	57.69	59.85	53.15	49	61.5	68.78
469.58	74.56	63.84	69.09	54.32	72.41	68.03	70.52	53.75	67.29	71.42	51.56	62.4	65.01	44.9	64.07	58.23	59.26	51.38	71.9	45.49	51.39	57.88	60.03	53.33	49.18	61.64	68.93
470.06	74.69	64.02	69.23	54.52	72.55	68.18	70.67	53.96	67.45	71.56	51.75	62.57	65.17	45.08	64.23	58.41	59.42	51.56	72.04	45.66	51.6	58.06	60.21	53.52	49.37	61.8	69.07
470.55	74.82	64.19	69.38	54.73	72.69	68.34	70.81	54.18	67.61	71.69	51.95	62.73	65.34	45.28	64.4	58.6	59.59	51.75	72.18	45.84	51.81	58.25	60.39	53.71	49.56	61.95	69.22
471.03	74.95	64.37	69.54	54.94	72.84	68.51	70.97	54.4	67.76	71.84	52.16	62.91	65.52	45.5	64.57	58.79	59.77	51.95	72.33	46.04	52.04	58.45	60.57	53.91	49.76	62.12	69.37
471.51	75.09	64.54	69.7	55.17	72.99	68.67	71.12	54.63	67.93	71.98	52.38	63.09	65.71	45.73	64.75	58.99	59.96	52.16	72.48	46.25	52.28	58.65	60.75	54.11	49.96	62.29	69.53
471.99	75.22	64.72	69.87	55.4	73.14	68.84	71.28	54.85	68.09	72.13	52.6	63.27	65.9	45.97	64.93	59.2	60.14	52.37	72.63	46.46	52.51	58.85	60.93	54.31	50.17	62.46	69.68
472.47	75.35	64.9	70.04	55.62	73.29	69.01	71.43	55.08	68.25	72.28	52.82	63.45	66.08	46.21	65.1	59.41	60.32	52.58	72.78	46.68	52.75	59.06	61.11	54.51	50.36	62.63	69.84
472.96	75.48	65.07	70.21	55.84	73.44	69.18	71.59	55.31	68.42	72.43	53.04	63.63	66.26	46.45	65.28	59.63	60.49	52.8	72.93	46.89	52.99	59.25	61.28	54.71	50.55	62.8	69.99
473.44	75.6	65.24	70.4	56.06	73.59	69.35	71.74	55.53	68.59	72.57	53.26	63.81	66.44	46.7	65.45	59.85	60.66	53.01	73.07	47.11	53.22	59.45	61.45	54.91	50.73	62.97	70.14
473.92	75.73	65.41	70.58	56.29	73.73	69.51	71.89	55.76	68.76	72.72	53.48	63.99	66.62	46.94	65.62	60.07	60.83	53.23	73.22	47.32	53.46	59.65	61.62	55.11	50.92	63.14	70.29
474.4	75.85	65.58	70.76	56.51	73.88	69.68	72.04	55.99	68.93	72.87	53.71	64.17	66.8	47.19	65.8	60.29	61.01	53.45	73.37	47.55	53.7	59.85	61.8	55.32	51.1	63.32	70.44
474.89	75.98	65.75	70.94	56.75	74.03	69.86	72.19	56.22	69.11	73.02	53.95	64.37	66.98	47.45	65.98	60.52	61.18	53.69	73.52	47.78	53.94	60.05	61.98	55.54	51.3	63.5	70.6
475.37	76.1	65.93	71.11	56.99	74.18	70.04	72.35	56.46	69.3	73.17	54.19	64.57	67.16	47.7	66.16	60.74	61.36	53.94	73.67	48.01	54.18	60.26	62.16	55.77	51.5	63.69	70.77
475.85	76.23	66.12	71.29	57.23	74.33	70.22	72.5	56.7	69.49	73.32	54.44	64.77	67.35	47.96	66.34	60.96	61.55	54.19	73.83	48.25	54.42	60.47	62.35	56	51.71	63.88	70.93
476.33	76.36	66.3	71.46	57.48	74.49	70.4	72.66	56.94	69.68	73.47	54.68	64.98	67.54	48.22	66.52	61.18	61.74	54.44	73.98	48.49	54.66	60.68	62.54	56.23	51.92	64.08	71.1
476.81	76.49	66.47	71.62	57.72	74.64	70.57	72.82	57.17	69.86	73.63	54.92	65.17	67.72	48.47	66.7	61.38	61.93	54.68	74.13	48.71	54.89	60.88	62.74	56.45	52.13	64.27	71.27
477.3	76.62	66.64	71.78	57.95	74.79	70.75	72.98	57.4	70.05	73.79	55.16	65.37	67.91	48.73	66.88	61.58	62.12	54.93	74.28	48.94	55.12	61.09	62.94	56.68	52.36	64.47	71.43
477.78	76.75	66.82	71.94	58.19	74.95	70.93	73.14	57.63	70.24	73.95	55.41	65.57	68.1	48.99	67.05	61.78	62.32	55.18	74.44	49.18	55.36	61.29	63.14	56.91	52.58	64.67	71.6
478.26	76.89	67	72.11	58.42	75.11	71.12	73.31	57.86	70.43	74.11	55.66	65.78	68.3	49.26	67.24	61.99	62.53	55.44	74.6	49.42	55.6	61.51	63.36	57.14	52.82	64.87	71.78
478.74	77.05	67.19	72.29	58.65	75.28	71.31	73.48	58.11	70.64	74.29	55.92	65.99	68.5	49.55	67.43	62.22	62.76	55.72	74.76	49.68	55.86	61.75	63.59	57.38	53.08	65.09	71.96
479.22	77.2	67.39	72.47	58.87	75.45	71.52	73.65	58.36	70.85	74.47	56.19	66.21	68.71	49.85	67.62	62.45	63	56.01	74.93	49.94	56.14	62	63.84	57.63	53.34	65.31	72.15
479.71	77.36	67.59	72.65	59.1	75.62	71.72	73.83	58.62	71.07	74.66	56.47	66.43	68.93	50.15	67.82	62.68	63.25	56.3	75.11	50.22	56.42	62.25	64.09	57.88	53.6	65.53	72.34
480.19	77.52	67.79	72.84	59.32	75.8	71.93	74.01	58.87	71.29	74.85	56.74	66.65	69.14	50.46	68.02	62.93	63.49	56.59	75.29	50.5	56.7	62.51	64.35	58.14	53.87	65.76	72.53
480.67	77.69	68	73.01	59.55	75.97	72.14	74.18	59.13	71.5	75.04	57.01	66.87	69.34	50.75	68.22	63.18	63.74	56.89	75.47	50.78	56.99	62.77	64.6	58.39	54.13	65.98	72.73
481.15	77.85	68.21	73.19	59.78	76.15	72.35	74.36	59.38	71.72	75.23	57.29	67.09	69.55	51.05	68.42	63.43	63.99	57.18	75.66	51.06	57.28	63.03	64.86	58.64	54.4	66.21	72.92
481.63	78.02	68.42	73.36	60.01	76.33	72.56	74.53	59.64	71.94	75.42	57.57	67.31	69.75	51.35	68.63	63.69	64.25	57.49	75.84	51.35	57.57	63.3	65.12	58.89	54.67	66.44	73.12
482.12	78.18	68.63	73.54	60.26	76.51	72.77	74.71	59.9	72.16	75.61	57.85	67.54	69.96	51.66	68.84	63.95	64.51	57.79	76.03	51.65	57.86	63.56	65.38	59.16	54.94	66.67	73.32
482.6	78.35	68.85	73.72	60.53	76.7	72.98	74.88	60.17	72.38	75.81	58.14	67.77	70.17	51.99	69.06	64.22	64.77	58.11	76.21	51.97	58.15	63.83	65.64	59.43	55.21	66.91	73.53
483.08	78.51	69.06	73.89	60.82	76.89	73.19	75.05	60.45	72.61	76	58.44	68	70.38	52.33	69.28	64.48	65.03	58.43	76.4	52.3	58.44	64.1	65.9	59.71	55.49	67.15	73.74
483.56	78.67	69.28	74.07	61.11	77.07	73.4	75.23	60.73	72.83	76.19	58.75	68.23	70.59	52.68	69.5	64.75	65.29	58.75	76.59	52.63	58.73	64.37	66.16	60	55.77	67.4	73.94
484.05	78.83	69.5	74.25	61.4	77.26	73.62	75.4	61.01	73.05	76.38	59.05	68.46	70.8	53.02	69.72	65.01	65.56	59.07	76.77	52.96	59.02	64.64	66.42	60.29	56.05	67.65	74.15
484.53	78.98	69.71	74.42	61.67	77.44	73.83	75.58	61.29	73.27	76.57	59.35	68.69	71.02	53.37	69.95	65.27	65.82	59.38	76.95	53.28	59.3	64.89	66.68	60.57	56.32	67.89	74.36
485.01	79.13	69.92	74.6	61.95	77.62	74.04	75.75	61.57	73.48	76.76	59.66	68.92	71.24	53.72	70.17	65.53	66.08	59.7	77.13	53.6	59.58	65.14	66.94	60.86	56.59	68.14	74.57
485.49	79.29	70.13	74.78	62.23	77.8	74.26	75.93	61.85	73.7	76.95	59.96	69.16	71.46	54.07	70.4	65.79	66.34	60.02	77.31	53.91	59.86	65.39	67.19	61.14	56.86	68.39	74.78
485.97	79.44	70.35	74.97	62.52	77.98	74.47	76.11	62.14	73.92	77.14	60.27	69.39	71.69	54.43	70.63	66.06	66.6	60.34	77.49	54.23	60.14	65.64	67.46	61.44	57.14	68.64	74.99
486.46	79.6	70.57	75.16	62.82	78.17	74.69	76.29	62.43	74.14	77.33	60.59	69.64	71.92	54.79	70.86	66.33	66.87	60.67	77.68	54.54	60.43	65.9	67.72	61.73	57.42	68.89	75.21
486.94	79.75	70.79	75.35	63.12	78.35	74.91	76.48	62.73	74.37	77.52	60.92	69.88	72.16	55.16	71.1	66.61	67.14	61	77.86	54.86	60.73	66.17	68	62.04	57.7	69.15	75.43
487.42	79.91	71.02	75.55	63.43	78.54	75.13	76.67	63.03	74.59	77.71	61.24	70.13	72.4	55.53	71.33	66.89	67.4	61.34	78.05	55.17	61.03	66.44	68.27	62.34	57.98	69.41	75.65
487.9	80.07	71.25	75.75	63.73	78.72	75.35	76.85	63.33	74.82	77.91	61.57	70.38	72.64	55.9	71.57	67.16	67.68	61.67	78.24	55.49	61.33	66.71	68.54	62.64	58.27	69.67	75.88
488.38	80.23	71.48	75.95	64.02	78.9	75.56	77.04	63.64	75.05	78.1	61.9	70.63	72.87	56.27	71.8	67.44	67.95	62.01	78.43	55.8	61.63	66.98	68.81	62.94	58.55	69.93	76.1
488.87	80.39	71.71	76.16	64.31	79.09	75.78	77.22	63.94	75.28	78.28	62.24	70.88	73.11	56.64	72.03	67.71	68.22	62.34	78.62	56.11	61.93	67.26	69.08	63.23	58.83	70.18	76.33
489.35	80.55	71.94	76.37	64.59	79.27	75.99	77.41	64.24	75.51	78.47	62.57	71.14	73.35	57	72.27	67.99	68.49	62.67	78.81	56.43	62.24	67.54	69.35	63.52	59.12	70.44	76.56
489.83	80.72	72.17	76.58	64.88	79.45	76.21	77.59	64.55	75.74	78.66	62.91	71.39	73.59	57.38	72.51	68.26	68.77	63	79	56.74	62.55	67.82	69.62	63.81	59.41	70.69	76.79
490.31	80.88	72.4	76.8	65.17	79.64	76.44	77.78	64.86	75.97	78.85	63.25	71.64	73.82	57.76	72.75	68.53	69.05	63.34	79.19	57.07	62.88	68.11	69.89	64.11	59.72	70.94	77.02
490.79	81.05	72.63	77.02	65.46	79.83	76.66	77.97	65.17	76.21	79.04	63.6	71.9	74.06	58.14	72.99	68.79	69.34	63.68	79.38	57.41	63.22	68.39	70.16	64.42	60.03	71.2	77.24
491.28	81.21	72.87	77.24	65.76	80.02	76.89	78.15	65.48	76.44	79.23	63.95	72.16	74.3	58.52	73.23	69.06	69.62	64.02	79.57	57.74	63.55	68.68	70.43	64.73	60.35	71.45	77.47
491.76	81.38	73.1	77.46	66.05	80.21	77.11	78.34	65.79	76.68	79.42	64.3	72.41	74.54	58.9	73.48	69.32	69.91	64.35	79.76	58.08	63.89	68.96	70.7	65.03	60.66	71.71	77.7
492.24	81.55	73.33	77.68	66.35	80.4	77.33	78.52	66.1	76.91	79.61	64.64	72.66	74.77	59.27	73.72	69.57	70.18	64.68	79.96	58.41	64.22	69.24	70.97	65.34	60.97	71.96	77.93
492.72	81.71	73.56	77.9	66.66	80.59	77.55	78.71	66.4	77.14	79.8	64.98	72.91	75.01	59.64	73.96	69.82	70.46	65.01	80.15	58.73	64.54	69.51	71.24	65.65	61.28	72.21	78.15
493.21	81.88	73.8	78.12	66.97	80.78	77.77	78.89	66.7	77.37	79.99	65.33	73.16	75.24	60.01	74.2	70.07	70.74	65.33	80.34	59.06	64.86	69.79	71.52	65.95	61.59	72.46	78.37
493.69	82.05	74.03	78.34	67.29	80.97	77.99	79.08	67.01	77.6	80.18	65.68	73.41	75.48	60.38	74.44	70.32	71.01	65.66	80.54	59.4	65.18	70.07	71.8	66.26	61.91	72.71	78.6
494.17	82.22	74.26	78.57	67.62	81.17	78.21	79.26	67.33	77.84	80.37	66.03	73.66	75.72	60.74	74.68	70.57	71.29	65.99	80.74	59.74	65.5	70.35	72.09	66.57	62.22	72.97	78.83
494.65	82.39	74.5	78.8	67.95	81.37	78.43	79.45	67.64	78.07	80.56	66.39	73.92	75.97	61.11	74.93	70.83	71.58	66.33	80.95	60.09	65.82	70.64	72.38	66.88	62.54	73.24	79.07
495.13	82.55	74.74	79.02	68.29	81.56	78.64	79.64	67.96	78.31	80.76	66.75	74.18	76.21	61.48	75.17	71.08	71.86	66.66	81.15	60.44	66.14	70.93	72.68	67.19	62.86	73.5	79.3
495.62	82.72	74.97	79.25	68.63	81.76	78.85	79.83	68.28	78.54	80.95	67.1	74.43	76.46	61.84	75.42	71.34	72.13	67	81.36	60.79	66.46	71.21	72.97	67.5	63.18	73.76	79.53
496.1	82.88	75.2	79.46	68.97	81.95	79.06	80.02	68.6	78.77	81.14	67.44	74.68	76.7	62.19	75.66	71.6	72.4	67.33	81.56	61.13	66.79	71.49	73.25	67.79	63.49	74.02	79.76
496.58	83.03	75.43	79.67	69.31	82.14	79.27	80.2	68.91	79	81.33	67.78	74.93	76.93	62.53	75.89	71.87	72.67	67.67	81.77	61.47	67.11	71.77	73.54	68.08	63.79	74.28	79.99
497.06	83.19	75.65	79.88	69.64	82.33	79.47	80.38	69.23	79.23	81.52	68.11	75.18	77.17	62.87	76.13	72.14	72.93	68	81.97	61.8	67.43	72.04	73.82	68.37	64.1	74.54	80.21
497.54	83.34	75.87	80.09	69.97	82.51	79.67	80.56	69.54	79.45	81.7	68.45	75.43	77.4	63.21	76.36	72.41	73.2	68.33	82.18	62.14	67.76	72.31	74.09	68.67	64.4	74.8	80.44
498.03	83.49	76.1	80.3	70.29	82.69	79.87	80.74	69.86	79.68	81.89	68.78	75.68	77.63	63.57	76.6	72.67	73.46	68.66	82.38	62.49	68.09	72.59	74.36	68.97	64.71	75.06	80.66
498.51	83.64	76.32	80.51	70.6	82.88	80.07	80.92	70.17	79.91	82.08	69.11	75.93	77.86	63.92	76.83	72.94	73.73	68.99	82.58	62.83	68.42	72.86	74.63	69.28	65.01	75.31	80.88
498.99	83.79	76.54	80.71	70.91	83.05	80.26	81.09	70.49	80.14	82.26	69.44	76.17	78.09	64.28	77.07	73.2	74	69.32	82.78	63.18	68.75	73.13	74.9	69.59	65.31	75.57	81.09
499.47	83.94	76.75	80.91	71.21	83.23	80.45	81.26	70.8	80.37	82.44	69.76	76.42	78.31	64.64	77.3	73.45	74.26	69.64	82.98	63.52	69.08	73.4	75.16	69.89	65.61	75.82	81.3
499.96	84.09	76.96	81.11	71.5	83.4	80.64	81.44	71.09	80.59	82.62	70.07	76.65	78.53	64.99	77.52	73.69	74.51	69.95	83.17	63.85	69.4	73.66	75.42	70.2	65.89	76.06	81.5
500.44	84.23	77.17	81.3	71.79	83.57	80.83	81.61	71.39	80.8	82.79	70.38	76.88	78.74	65.33	77.74	73.93	74.75	70.25	83.35	64.18	69.71	73.91	75.68	70.5	66.18	76.29	81.7
500.92	84.38	77.37	81.49	72.07	83.74	81.01	81.77	71.67	81.02	82.96	70.68	77.11	78.95	65.68	77.96	74.16	74.99	70.54	83.53	64.5	70.02	74.16	75.93	70.8	66.46	76.52	81.9
501.4	84.53	77.58	81.67	72.35	83.91	81.19	81.94	71.96	81.23	83.13	70.98	77.33	79.16	66.02	78.18	74.39	75.23	70.84	83.71	64.82	70.33	74.41	76.19	71.1	66.74	76.74	82.09
501.88	84.68	77.79	81.85	72.63	84.08	81.38	82.11	72.24	81.44	83.29	71.29	77.56	79.37	66.37	78.4	74.62	75.46	71.13	83.89	65.13	70.63	74.67	76.46	71.4	67.03	76.97	82.28
502.37	84.83	77.99	82.03	72.91	84.24	81.56	82.27	72.52	81.65	83.46	71.59	77.78	79.58	66.72	78.62	74.86	75.69	71.42	84.07	65.45	70.92	74.92	76.73	71.7	67.32	77.19	82.47
502.85	84.97	78.2	82.2	73.19	84.4	81.74	82.44	72.79	81.86	83.62	71.89	78	79.78	67.07	78.83	75.09	75.91	71.71	84.24	65.76	71.21	75.17	76.99	71.99	67.61	77.41	82.66
503.33	85.11	78.4	82.37	73.47	84.55	81.92	82.59	73.06	82.07	83.77	72.18	78.22	79.98	67.41	79.05	75.33	76.13	71.99	84.41	66.06	71.49	75.42	77.25	72.28	67.89	77.62	82.84
503.81	85.25	78.6	82.53	73.74	84.7	82.09	82.74	73.32	82.26	83.92	72.46	78.44	80.18	67.73	79.25	75.57	76.33	72.27	84.57	66.36	71.76	75.66	77.51	72.56	68.16	77.83	83.02
504.29	85.38	78.8	82.68	74	84.84	82.26	82.89	73.57	82.45	84.07	72.74	78.64	80.37	68.05	79.46	75.81	76.54	72.53	84.73	66.65	72.03	75.89	77.76	72.82	68.42	78.02	83.19
504.78	85.51	78.99	82.82	74.25	84.98	82.42	83.03	73.83	82.64	84.21	73.02	78.85	80.55	68.35	79.66	76.05	76.74	72.79	84.89	66.93	72.29	76.13	78.01	73.08	68.68	78.22	83.36
505.26	85.64	79.18	82.97	74.5	85.12	82.58	83.17	74.08	82.82	84.36	73.28	79.05	80.73	68.65	79.86	76.28	76.93	73.04	85.04	67.21	72.54	76.36	78.25	73.32	68.93	78.41	83.53
505.74	85.76	79.36	83.11	74.74	85.26	82.74	83.31	74.34	83	84.5	73.55	79.25	80.91	68.95	80.05	76.5	77.13	73.29	85.19	67.5	72.8	76.58	78.49	73.56	69.18	78.61	83.69
506.22	85.88	79.55	83.25	74.97	85.39	82.9	83.44	74.6	83.17	84.64	73.81	79.44	81.09	69.24	80.25	76.71	77.32	73.54	85.33	67.78	73.04	76.81	78.73	73.79	69.43	78.8	83.85
506.7	85.99	79.73	83.39	75.2	85.52	83.05	83.57	74.85	83.34	84.77	74.06	79.62	81.25	69.53	80.43	76.92	77.52	73.78	85.48	68.06	73.28	77.03	78.95	74.01	69.67	78.99	84.01
507.19	86.1	79.91	83.52	75.41	85.65	83.2	83.7	75.1	83.49	84.91	74.3	79.8	81.42	69.8	80.61	77.12	77.7	74.01	85.62	68.34	73.52	77.24	79.17	74.22	69.91	79.17	84.16
507.67	86.21	80.07	83.65	75.61	85.78	83.34	83.82	75.34	83.64	85.04	74.53	79.97	81.57	70.07	80.78	77.3	77.88	74.22	85.75	68.59	73.74	77.44	79.38	74.42	70.14	79.35	84.31
508.15	86.31	80.23	83.77	75.8	85.9	83.48	83.94	75.58	83.78	85.16	74.75	80.13	81.72	70.32	80.94	77.49	78.06	74.43	85.88	68.84	73.95	77.64	79.58	74.61	70.35	79.53	84.45
508.63	86.4	80.39	83.89	75.99	86.02	83.62	84.06	75.8	83.91	85.28	74.96	80.29	81.86	70.57	81.1	77.66	78.23	74.63	86.01	69.09	74.16	77.83	79.77	74.79	70.57	79.69	84.59
509.12	86.5	80.54	84.01	76.16	86.14	83.75	84.17	76.02	84.04	85.4	75.17	80.44	82	70.81	81.25	77.84	78.39	74.83	86.13	69.32	74.37	78.01	79.96	74.97	70.78	79.86	84.73
509.6	86.59	80.69	84.13	76.34	86.25	83.88	84.28	76.23	84.17	85.51	75.37	80.58	82.14	71.05	81.4	78.03	78.56	75.03	86.25	69.56	74.58	78.19	80.15	75.15	70.99	80.01	84.86
510.08	86.67	80.83	84.24	76.52	86.36	84.01	84.38	76.44	84.29	85.61	75.57	80.73	82.27	71.29	81.54	78.21	78.72	75.22	86.37	69.79	74.79	78.37	80.32	75.32	71.19	80.17	84.98
510.56	86.75	80.96	84.35	76.69	86.46	84.13	84.48	76.64	84.41	85.71	75.76	80.86	82.39	71.52	81.68	78.39	78.87	75.41	86.48	70.01	75	78.54	80.5	75.49	71.39	80.31	85.1
511.04	86.83	81.09	84.46	76.85	86.56	84.25	84.58	76.82	84.52	85.81	75.94	80.99	82.51	71.74	81.82	78.55	79.02	75.59	86.58	70.22	75.2	78.71	80.66	75.66	71.58	80.45	85.22
511.53	86.91	81.22	84.56	77	86.65	84.35	84.67	77	84.63	85.89	76.1	81.12	82.63	71.94	81.95	78.7	79.15	75.75	86.68	70.42	75.38	78.86	80.82	75.81	71.75	80.57	85.33
512.01	86.98	81.33	84.65	77.14	86.74	84.45	84.76	77.16	84.73	85.97	76.26	81.24	82.73	72.13	82.07	78.84	79.28	75.91	86.77	70.61	75.56	79	80.97	75.95	71.91	80.69	85.43
512.49	87.05	81.44	84.74	77.27	86.82	84.55	84.84	77.31	84.82	86.05	76.41	81.35	82.83	72.32	82.19	78.97	79.4	76.07	86.86	70.79	75.74	79.14	81.11	76.09	72.06	80.8	85.53
512.97	87.12	81.55	84.82	77.4	86.9	84.63	84.92	77.46	84.91	86.12	76.55	81.46	82.93	72.49	82.31	79.09	79.52	76.21	86.94	70.97	75.9	79.27	81.25	76.22	72.21	80.91	85.62
513.45	87.18	81.65	84.91	77.53	86.97	84.72	85	77.6	85	86.2	76.69	81.56	83.03	72.67	82.42	79.2	79.63	76.35	87.02	71.15	76.07	79.4	81.38	76.35	72.35	81.01	85.72
513.94	87.24	81.75	84.99	77.64	87.05	84.8	85.07	77.73	85.08	86.27	76.82	81.66	83.12	72.83	82.54	79.29	79.74	76.49	87.09	71.33	76.22	79.53	81.51	76.47	72.49	81.11	85.8
514.42	87.29	81.85	85.06	77.76	87.12	84.87	85.14	77.86	85.16	86.33	76.94	81.76	83.2	72.99	82.65	79.38	79.85	76.61	87.16	71.5	76.37	79.65	81.63	76.59	72.62	81.2	85.89
514.9	87.34	81.94	85.13	77.86	87.18	84.94	85.21	77.98	85.23	86.4	77.06	81.85	83.29	73.13	82.75	79.45	79.94	76.74	87.22	71.67	76.51	79.76	81.74	76.7	72.75	81.29	85.97
515.38	87.38	82.02	85.2	77.95	87.24	85	85.28	78.08	85.29	86.45	77.16	81.93	83.36	73.25	82.84	79.53	80.03	76.85	87.28	71.82	76.64	79.86	81.85	76.8	72.86	81.38	86.04
515.86	87.42	82.1	85.25	78.04	87.3	85.06	85.34	78.18	85.34	86.51	77.25	82.01	83.44	73.36	82.93	79.59	80.11	76.96	87.33	71.98	76.76	79.95	81.94	76.89	72.97	81.45	86.11
516.35	87.45	82.18	85.31	78.12	87.35	85.12	85.39	78.27	85.39	86.56	77.34	82.08	83.51	73.46	83.01	79.65	80.19	77.06	87.37	72.12	76.87	80.03	82.03	76.97	73.07	81.53	86.17
516.83	87.47	82.25	85.36	78.19	87.4	85.17	85.44	78.35	85.43	86.61	77.42	82.14	83.57	73.56	83.09	79.71	80.25	77.16	87.41	72.25	76.97	80.1	82.11	77.04	73.16	81.59	86.23
517.31	87.49	82.31	85.41	78.26	87.44	85.22	85.49	78.42	85.47	86.65	77.49	82.2	83.63	73.65	83.16	79.76	80.31	77.25	87.45	72.38	77.07	80.17	82.18	77.11	73.24	81.65	86.27
517.79	87.5	82.36	85.45	78.33	87.48	85.26	85.53	78.49	85.5	86.68	77.55	82.26	83.68	73.73	83.22	79.81	80.37	77.34	87.48	72.5	77.15	80.23	82.24	77.17	73.32	81.71	86.32
518.28	87.51	82.41	85.5	78.39	87.52	85.3	85.56	78.54	85.53	86.72	77.61	82.3	83.73	73.8	83.28	79.86	80.41	77.42	87.51	72.61	77.22	80.29	82.3	77.23	73.38	81.76	86.35
518.76	87.51	82.45	85.53	78.44	87.55	85.33	85.59	78.59	85.55	86.74	77.65	82.35	83.77	73.86	83.32	79.9	80.45	77.49	87.54	72.71	77.28	80.33	82.35	77.28	73.44	81.8	86.38
519.24	87.52	82.48	85.57	78.48	87.57	85.36	85.61	78.62	85.56	86.76	77.69	82.38	83.8	73.91	83.37	79.93	80.49	77.54	87.56	72.78	77.33	80.37	82.39	77.32	73.49	81.83	86.4
519.72	87.51	82.5	85.6	78.51	87.59	85.39	85.63	78.64	85.57	86.78	77.72	82.41	83.82	73.95	83.4	79.95	80.52	77.58	87.57	72.85	77.37	80.4	82.42	77.35	73.53	81.86	86.42
520.2	87.51	82.51	85.62	78.54	87.61	85.41	85.64	78.65	85.57	86.79	77.74	82.43	83.84	73.98	83.43	79.97	80.54	77.62	87.58	72.91	77.4	80.42	82.45	77.38	73.56	81.88	86.43
520.69	87.51	82.53	85.64	78.56	87.62	85.43	85.65	78.66	85.57	86.79	77.76	82.45	83.85	74.01	83.46	79.99	80.57	77.65	87.59	72.96	77.42	80.44	82.47	77.4	73.6	81.89	86.44
521.17	87.51	82.55	85.65	78.57	87.63	85.45	85.66	78.67	85.57	86.8	77.77	82.47	83.86	74.03	83.49	80	80.59	77.67	87.6	73.01	77.44	80.46	82.49	77.43	73.63	81.9	86.45
521.65	87.51	82.56	85.66	78.57	87.63	85.47	85.66	78.67	85.57	86.8	77.78	82.48	83.86	74.04	83.51	80.01	80.61	77.68	87.6	73.05	77.46	80.47	82.51	77.45	73.66	81.91	86.45
522.13	87.51	82.58	85.67	78.57	87.63	85.49	85.67	78.67	85.56	86.8	77.78	82.49	83.87	74.05	83.52	80.01	80.62	77.69	87.61	73.09	77.47	80.48	82.52	77.46	73.69	81.91	86.45
522.61	87.51	82.59	85.67	78.56	87.63	85.5	85.67	78.66	85.54	86.8	77.78	82.49	83.86	74.05	83.54	80.01	80.63	77.69	87.6	73.12	77.48	80.49	82.52	77.46	73.71	81.91	86.45
523.1	87.51	82.59	85.66	78.54	87.62	85.5	85.67	78.64	85.53	86.79	77.76	82.48	83.85	74.03	83.54	80.01	80.63	77.68	87.6	73.13	77.47	80.48	82.52	77.46	73.73	81.9	86.44
523.58	87.5	82.59	85.65	78.51	87.61	85.5	85.67	78.61	85.51	86.79	77.74	82.47	83.84	74.01	83.54	80	80.63	77.66	87.59	73.14	77.46	80.47	82.51	77.45	73.74	81.89	86.43
524.06	87.5	82.59	85.64	78.48	87.6	85.49	85.66	78.58	85.48	86.78	77.72	82.46	83.82	73.98	83.54	79.98	80.62	77.64	87.57	73.15	77.44	80.46	82.5	77.43	73.74	81.88	86.42
524.54	87.49	82.59	85.62	78.44	87.58	85.48	85.66	78.54	85.46	86.76	77.68	82.44	83.8	73.94	83.53	79.96	80.61	77.62	87.56	73.15	77.43	80.44	82.48	77.41	73.74	81.86	86.41
525.03	87.47	82.58	85.6	78.39	87.57	85.47	85.65	78.51	85.43	86.75	77.65	82.43	83.78	73.9	83.53	79.94	80.6	77.59	87.54	73.15	77.41	80.42	82.47	77.4	73.74	81.84	86.39
525.51	87.45	82.58	85.59	78.34	87.55	85.46	85.64	78.47	85.4	86.74	77.62	82.41	83.76	73.86	83.52	79.92	80.59	77.57	87.52	73.14	77.39	80.4	82.44	77.38	73.74	81.82	86.37
525.99	87.43	82.56	85.56	78.29	87.53	85.44	85.63	78.42	85.36	86.72	77.57	82.39	83.73	73.8	83.5	79.89	80.57	77.54	87.49	73.13	77.37	80.36	82.42	77.36	73.73	81.79	86.35
526.47	87.4	82.55	85.54	78.23	87.5	85.42	85.62	78.38	85.33	86.7	77.53	82.37	83.71	73.74	83.48	79.86	80.55	77.5	87.46	73.11	77.34	80.33	82.39	77.33	73.72	81.76	86.33
526.95	87.37	82.52	85.51	78.16	87.48	85.39	85.6	78.32	85.28	86.67	77.47	82.34	83.68	73.67	83.46	79.83	80.52	77.46	87.43	73.09	77.3	80.28	82.35	77.29	73.69	81.72	86.3
527.44	87.33	82.5	85.48	78.09	87.45	85.36	85.57	78.27	85.23	86.65	77.4	82.31	83.64	73.6	83.43	79.79	80.48	77.4	87.39	73.06	77.26	80.23	82.31	77.26	73.66	81.68	86.27
527.92	87.28	82.46	85.45	78.01	87.41	85.32	85.55	78.2	85.17	86.61	77.34	82.27	83.61	73.51	83.4	79.75	80.44	77.35	87.34	73.02	77.21	80.17	82.26	77.21	73.63	81.64	86.23
528.4	87.24	82.43	85.42	77.93	87.38	85.28	85.52	78.14	85.11	86.58	77.27	82.23	83.57	73.43	83.37	79.71	80.4	77.28	87.3	72.98	77.16	80.11	82.21	77.17	73.59	81.59	86.19
528.88	87.19	82.39	85.39	77.84	87.34	85.24	85.49	78.07	85.04	86.54	77.19	82.19	83.54	73.34	83.33	79.66	80.35	77.22	87.25	72.93	77.1	80.05	82.16	77.12	73.56	81.55	86.15
529.36	87.14	82.36	85.36	77.75	87.3	85.19	85.46	78.01	84.98	86.51	77.12	82.15	83.5	73.24	83.29	79.61	80.3	77.14	87.2	72.88	77.04	79.99	82.11	77.07	73.52	81.49	86.11
529.85	87.09	82.32	85.33	77.66	87.25	85.15	85.43	77.94	84.91	86.47	77.04	82.1	83.46	73.14	83.25	79.55	80.25	77.07	87.15	72.83	76.98	79.92	82.05	77.01	73.48	81.44	86.07
530.33	87.04	82.27	85.3	77.57	87.21	85.09	85.4	77.86	84.83	86.42	76.95	82.05	83.41	73.04	83.2	79.5	80.19	76.98	87.1	72.76	76.91	79.85	81.98	76.95	73.43	81.38	86.03
530.81	87	82.23	85.27	77.47	87.16	85.04	85.35	77.78	84.75	86.37	76.87	81.99	83.36	72.93	83.15	79.43	80.12	76.89	87.04	72.68	76.83	79.77	81.91	76.88	73.37	81.32	85.97
531.29	86.95	82.18	85.24	77.37	87.11	84.98	85.31	77.7	84.67	86.32	76.77	81.93	83.31	72.81	83.1	79.36	80.05	76.8	86.98	72.6	76.75	79.69	81.83	76.81	73.3	81.25	85.92
531.77	86.9	82.14	85.21	77.26	87.05	84.92	85.27	77.61	84.59	86.27	76.68	81.87	83.25	72.68	83.04	79.29	79.98	76.69	86.92	72.5	76.66	79.6	81.75	76.74	73.24	81.18	85.86
532.26	86.85	82.09	85.17	77.16	87	84.85	85.22	77.52	84.5	86.22	76.58	81.8	83.2	72.55	82.98	79.22	79.9	76.59	86.86	72.41	76.56	79.52	81.67	76.66	73.17	81.11	85.81
532.74	86.81	82.03	85.14	77.06	86.94	84.78	85.17	77.42	84.42	86.16	76.49	81.74	83.14	72.42	82.92	79.15	79.82	76.48	86.8	72.31	76.47	79.44	81.58	76.59	73.09	81.04	85.74
533.22	86.77	81.98	85.1	76.96	86.89	84.71	85.12	77.33	84.33	86.11	76.39	81.67	83.08	72.28	82.85	79.07	79.74	76.38	86.74	72.21	76.38	79.36	81.5	76.51	73.02	80.97	85.68
533.7	86.72	81.92	85.05	76.86	86.83	84.64	85.07	77.23	84.25	86.05	76.29	81.61	83.02	72.14	82.79	79	79.66	76.27	86.67	72.11	76.28	79.28	81.41	76.43	72.94	80.89	85.62
534.19	86.67	81.86	85.01	76.75	86.77	84.57	85.02	77.13	84.17	85.99	76.19	81.54	82.96	71.99	82.72	78.92	79.58	76.15	86.61	72.01	76.18	79.19	81.32	76.34	72.86	80.82	85.55
534.67	86.63	81.79	84.96	76.64	86.71	84.5	84.97	77.02	84.08	85.94	76.08	81.47	82.89	71.83	82.65	78.84	79.49	76.03	86.54	71.9	76.08	79.11	81.23	76.25	72.79	80.74	85.49
535.15	86.57	81.72	84.9	76.51	86.65	84.42	84.92	76.92	84	85.88	75.98	81.4	82.82	71.67	82.58	78.76	79.41	75.91	86.47	71.8	75.97	79.03	81.14	76.15	72.71	80.65	85.42
535.63	86.52	81.65	84.84	76.39	86.59	84.34	84.87	76.81	83.92	85.82	75.87	81.33	82.76	71.51	82.51	78.68	79.33	75.79	86.39	71.69	75.87	78.94	81.04	76.06	72.63	80.57	85.35
536.11	86.46	81.57	84.78	76.27	86.53	84.27	84.82	76.7	83.84	85.77	75.76	81.25	82.69	71.35	82.43	78.59	79.25	75.66	86.32	71.59	75.76	78.85	80.95	75.96	72.55	80.49	85.29
536.6	86.41	81.5	84.72	76.14	86.46	84.19	84.77	76.59	83.75	85.71	75.65	81.18	82.62	71.19	82.36	78.5	79.17	75.54	86.25	71.48	75.66	78.76	80.86	75.87	72.48	80.4	85.22
537.08	86.35	81.42	84.66	76.02	86.4	84.11	84.72	76.49	83.67	85.65	75.54	81.1	82.55	71.04	82.28	78.4	79.09	75.42	86.18	71.38	75.56	78.66	80.76	75.78	72.4	80.32	85.15
537.56	86.29	81.34	84.59	75.9	86.34	84.03	84.68	76.38	83.59	85.6	75.43	81.03	82.49	70.88	82.21	78.3	79.02	75.3	86.11	71.27	75.45	78.56	80.67	75.69	72.33	80.24	85.09
538.04	86.23	81.27	84.52	75.79	86.28	83.95	84.63	76.28	83.5	85.54	75.33	80.95	82.42	70.73	82.13	78.2	78.94	75.18	86.04	71.17	75.35	78.46	80.58	75.6	72.25	80.16	85.02
538.52	86.17	81.19	84.46	75.68	86.22	83.87	84.58	76.17	83.42	85.49	75.21	80.88	82.35	70.57	82.06	78.1	78.86	75.06	85.98	71.06	75.25	78.37	80.48	75.51	72.16	80.08	84.96
539.01	86.12	81.11	84.39	75.58	86.16	83.8	84.53	76.07	83.33	85.43	75.1	80.8	82.28	70.41	81.98	78.01	78.77	74.94	85.91	70.94	75.14	78.27	80.39	75.42	72.08	79.99	84.89
539.49	86.06	81.04	84.32	75.48	86.1	83.72	84.49	75.97	83.25	85.38	74.99	80.72	82.21	70.26	81.91	77.91	78.68	74.83	85.84	70.83	75.04	78.18	80.29	75.33	71.99	79.91	84.83
539.97	86.01	80.97	84.26	75.39	86.04	83.64	84.44	75.87	83.17	85.33	74.88	80.65	82.14	70.11	81.83	77.82	78.6	74.71	85.78	70.72	74.93	78.09	80.2	75.24	71.91	79.84	84.76
540.45	85.95	80.9	84.19	75.31	85.98	83.57	84.39	75.78	83.1	85.28	74.77	80.58	82.07	69.96	81.76	77.74	78.51	74.6	85.72	70.61	74.82	78.01	80.11	75.16	71.83	79.76	84.7
540.94	85.9	80.83	84.13	75.23	85.92	83.5	84.35	75.7	83.02	85.23	74.66	80.5	82.01	69.81	81.69	77.65	78.43	74.5	85.66	70.5	74.71	77.93	80.02	75.08	71.75	79.68	84.64
541.42	85.85	80.77	84.07	75.16	85.87	83.44	84.3	75.62	82.95	85.19	74.56	80.43	81.94	69.67	81.61	77.57	78.34	74.39	85.6	70.39	74.6	77.85	79.93	75.01	71.68	79.61	84.58
541.9	85.81	80.71	84.01	75.1	85.81	83.37	84.26	75.53	82.87	85.14	74.46	80.36	81.88	69.53	81.54	77.49	78.26	74.29	85.55	70.27	74.48	77.77	79.84	74.94	71.6	79.53	84.52
542.38	85.76	80.65	83.94	75.03	85.76	83.3	84.21	75.44	82.8	85.09	74.36	80.29	81.81	69.4	81.47	77.41	78.18	74.18	85.49	70.16	74.36	77.69	79.75	74.86	71.51	79.46	84.46
542.86	85.72	80.59	83.88	74.96	85.71	83.23	84.17	75.36	82.73	85.04	74.26	80.23	81.75	69.26	81.39	77.33	78.1	74.07	85.43	70.05	74.25	77.6	79.66	74.79	71.43	79.38	84.4
543.35	85.68	80.53	83.82	74.9	85.65	83.17	84.12	75.27	82.65	84.99	74.16	80.16	81.68	69.13	81.32	77.25	78.02	73.97	85.37	69.93	74.13	77.52	79.57	74.72	71.35	79.31	84.34
543.83	85.64	80.47	83.76	74.83	85.6	83.11	84.08	75.18	82.58	84.95	74.06	80.09	81.62	69.01	81.25	77.17	77.94	73.87	85.31	69.83	74.02	77.43	79.48	74.65	71.27	79.24	84.28
544.31	85.6	80.42	83.7	74.76	85.55	83.04	84.03	75.1	82.51	84.9	73.97	80.03	81.56	68.89	81.18	77.09	77.87	73.77	85.26	69.72	73.91	77.35	79.39	74.59	71.18	79.17	84.23
544.79	85.56	80.37	83.65	74.68	85.51	82.99	83.99	75.01	82.44	84.86	73.88	79.97	81.51	68.77	81.11	77.01	77.8	73.67	85.2	69.62	73.81	77.27	79.31	74.52	71.1	79.1	84.18
545.27	85.53	80.31	83.6	74.61	85.46	82.93	83.95	74.93	82.38	84.82	73.8	79.91	81.46	68.66	81.04	76.94	77.73	73.58	85.15	69.53	73.71	77.2	79.22	74.46	71.02	79.03	84.13
545.76	85.5	80.27	83.54	74.53	85.42	82.88	83.91	74.86	82.32	84.78	73.71	79.86	81.41	68.55	80.98	76.87	77.66	73.49	85.1	69.44	73.62	77.12	79.15	74.4	70.95	78.97	84.08
546.24	85.46	80.22	83.5	74.46	85.38	82.83	83.86	74.78	82.26	84.74	73.63	79.81	81.36	68.45	80.91	76.8	77.59	73.41	85.05	69.35	73.53	77.05	79.07	74.34	70.88	78.91	84.04
546.72	85.43	80.17	83.45	74.38	85.35	82.78	83.82	74.72	82.21	84.7	73.55	79.76	81.31	68.35	80.86	76.75	77.52	73.33	85.01	69.27	73.45	76.98	79.01	74.29	70.81	78.85	83.99
547.2	85.4	80.12	83.41	74.32	85.31	82.74	83.78	74.65	82.16	84.66	73.48	79.72	81.27	68.26	80.8	76.69	77.46	73.25	84.96	69.19	73.37	76.92	78.94	74.23	70.75	78.79	83.95
547.68	85.37	80.08	83.37	74.26	85.28	82.7	83.75	74.6	82.12	84.63	73.41	79.68	81.23	68.17	80.75	76.65	77.39	73.18	84.92	69.12	73.29	76.86	78.88	74.19	70.69	78.74	83.91
548.17	85.35	80.04	83.33	74.2	85.26	82.67	83.71	74.55	82.08	84.6	73.34	79.64	81.19	68.09	80.71	76.61	77.34	73.12	84.89	69.05	73.22	76.81	78.83	74.14	70.64	78.69	83.87
548.65	85.32	80.01	83.3	74.16	85.24	82.64	83.68	74.5	82.04	84.58	73.28	79.62	81.16	68.02	80.67	76.59	77.29	73.06	84.85	68.99	73.16	76.77	78.78	74.11	70.6	78.65	83.83
549.13	85.3	79.98	83.27	74.12	85.22	82.61	83.65	74.46	82.01	84.56	73.23	79.59	81.13	67.96	80.63	76.57	77.24	73	84.82	68.93	73.1	76.74	78.73	74.07	70.56	78.62	83.79
549.61	85.28	79.95	83.24	74.08	85.2	82.59	83.63	74.43	81.98	84.53	73.17	79.57	81.09	67.89	80.6	76.55	77.2	72.95	84.8	68.88	73.04	76.71	78.69	74.04	70.53	78.58	83.75
550.1	85.26	79.92	83.21	74.04	85.18	82.56	83.6	74.4	81.95	84.51	73.12	79.54	81.06	67.83	80.57	76.53	77.17	72.9	84.77	68.83	72.97	76.68	78.64	74.01	70.5	78.55	83.71
550.58	85.24	79.89	83.17	74.01	85.16	82.54	83.58	74.38	81.92	84.5	73.08	79.52	81.03	67.77	80.54	76.52	77.14	72.85	84.74	68.78	72.91	76.66	78.59	73.98	70.47	78.52	83.68
551.06	85.23	79.87	83.14	73.98	85.15	82.51	83.56	74.36	81.89	84.48	73.04	79.5	81.01	67.72	80.52	76.5	77.11	72.8	84.72	68.74	72.86	76.64	78.55	73.96	70.44	78.49	83.65
551.54	85.21	79.85	83.11	73.96	85.14	82.49	83.55	74.35	81.87	84.47	73	79.49	80.99	67.67	80.49	76.49	77.09	72.76	84.7	68.7	72.81	76.63	78.52	73.93	70.43	78.47	83.62
552.02	85.21	79.84	83.09	73.94	85.14	82.48	83.53	74.34	81.86	84.46	72.97	79.47	80.97	67.63	80.47	76.47	77.08	72.74	84.68	68.68	72.78	76.62	78.49	73.91	70.41	78.45	83.59
552.51	85.21	79.84	83.06	73.93	85.13	82.47	83.53	74.35	81.85	84.46	72.94	79.46	80.96	67.6	80.46	76.46	77.07	72.72	84.67	68.66	72.76	76.61	78.47	73.89	70.41	78.43	83.58
552.99	85.21	79.84	83.04	73.92	85.13	82.47	83.52	74.35	81.84	84.46	72.92	79.45	80.95	67.57	80.45	76.46	77.06	72.7	84.66	68.64	72.75	76.61	78.45	73.88	70.4	78.42	83.56
553.47	85.22	79.84	83.03	73.91	85.13	82.47	83.52	74.36	81.84	84.46	72.91	79.45	80.95	67.55	80.44	76.46	77.06	72.69	84.66	68.64	72.74	76.61	78.44	73.87	70.4	78.42	83.55
553.95	85.23	79.84	83.02	73.91	85.14	82.48	83.52	74.37	81.84	84.46	72.9	79.45	80.96	67.53	80.44	76.47	77.06	72.68	84.66	68.63	72.75	76.62	78.44	73.87	70.41	78.41	83.55
554.43	85.24	79.85	83.02	73.91	85.14	82.49	83.52	74.38	81.85	84.47	72.9	79.45	80.97	67.53	80.44	76.49	77.06	72.68	84.66	68.63	72.76	76.63	78.44	73.87	70.41	78.41	83.55
554.92	85.25	79.86	83.02	73.91	85.15	82.5	83.53	74.39	81.86	84.47	72.91	79.46	80.98	67.53	80.44	76.51	77.07	72.69	84.67	68.63	72.78	76.65	78.44	73.88	70.42	78.41	83.56
555.4	85.27	79.87	83.03	73.92	85.17	82.52	83.54	74.41	81.88	84.49	72.92	79.47	81	67.54	80.45	76.54	77.08	72.7	84.68	68.64	72.81	76.67	78.45	73.9	70.44	78.42	83.57
555.88	85.29	79.88	83.04	73.94	85.18	82.54	83.55	74.43	81.9	84.5	72.94	79.49	81.02	67.55	80.46	76.58	77.1	72.71	84.7	68.66	72.84	76.7	78.46	73.93	70.46	78.43	83.58
556.36	85.32	79.89	83.06	73.96	85.2	82.56	83.56	74.46	81.92	84.52	72.97	79.51	81.04	67.58	80.48	76.61	77.12	72.74	84.72	68.69	72.89	76.73	78.48	73.97	70.49	78.44	83.6
556.84	85.34	79.91	83.07	73.99	85.22	82.59	83.58	74.49	81.96	84.54	73	79.54	81.07	67.62	80.51	76.65	77.15	72.77	84.74	68.72	72.93	76.78	78.5	74.01	70.52	78.46	83.62
557.33	85.37	79.93	83.09	74.03	85.25	82.62	83.59	74.52	81.99	84.56	73.04	79.57	81.11	67.66	80.53	76.7	77.18	72.8	84.76	68.76	72.98	76.82	78.52	74.06	70.56	78.49	83.64
557.81	85.39	79.95	83.11	74.06	85.28	82.65	83.61	74.56	82.03	84.59	73.08	79.6	81.14	67.71	80.57	76.73	77.22	72.85	84.79	68.8	73.04	76.87	78.55	74.12	70.6	78.52	83.67
558.29	85.41	79.98	83.14	74.11	85.31	82.69	83.64	74.61	82.07	84.62	73.12	79.64	81.18	67.77	80.6	76.77	77.26	72.9	84.82	68.85	73.1	76.93	78.58	74.18	70.65	78.55	83.69
558.77	85.44	80.01	83.17	74.16	85.35	82.72	83.66	74.66	82.11	84.65	73.17	79.68	81.22	67.83	80.65	76.81	77.31	72.95	84.85	68.91	73.17	76.99	78.61	74.25	70.7	78.59	83.73
559.26	85.47	80.04	83.2	74.22	85.39	82.77	83.69	74.72	82.16	84.69	73.23	79.73	81.27	67.9	80.69	76.86	77.37	73.02	84.89	68.98	73.23	77.06	78.65	74.32	70.76	78.64	83.76
559.74	85.49	80.08	83.24	74.28	85.43	82.81	83.72	74.79	82.21	84.73	73.29	79.79	81.32	67.98	80.74	76.91	77.43	73.09	84.93	69.05	73.3	77.13	78.7	74.39	70.82	78.68	83.8
560.22	85.52	80.13	83.29	74.36	85.48	82.86	83.76	74.87	82.26	84.78	73.36	79.85	81.37	68.07	80.8	76.96	77.5	73.18	84.97	69.13	73.38	77.21	78.75	74.47	70.89	78.74	83.84
560.7	85.55	80.18	83.34	74.44	85.53	82.92	83.79	74.95	82.32	84.83	73.43	79.91	81.43	68.16	80.86	77.02	77.58	73.27	85.02	69.22	73.46	77.29	78.8	74.55	70.97	78.8	83.88
561.18	85.58	80.24	83.4	74.53	85.58	82.98	83.83	75.03	82.38	84.88	73.51	79.98	81.49	68.26	80.92	77.09	77.66	73.36	85.07	69.31	73.54	77.37	78.86	74.64	71.05	78.86	83.93
561.67	85.62	80.3	83.46	74.62	85.64	83.04	83.88	75.12	82.44	84.93	73.6	80.05	81.56	68.37	80.99	77.16	77.74	73.47	85.13	69.41	73.63	77.46	78.93	74.73	71.14	78.92	83.98
562.15	85.67	80.37	83.53	74.72	85.7	83.11	83.93	75.22	82.51	84.99	73.69	80.12	81.62	68.48	81.06	77.24	77.82	73.58	85.18	69.51	73.72	77.54	79	74.82	71.23	78.99	84.03
562.63	85.71	80.44	83.6	74.82	85.76	83.18	83.98	75.32	82.58	85.04	73.78	80.2	81.7	68.6	81.13	77.32	77.91	73.69	85.24	69.61	73.81	77.63	79.07	74.92	71.33	79.07	84.09
563.11	85.76	80.52	83.67	74.93	85.83	83.25	84.03	75.43	82.65	85.1	73.88	80.28	81.78	68.72	81.21	77.41	78	73.81	85.3	69.72	73.92	77.73	79.15	75.02	71.43	79.14	84.15
563.59	85.82	80.6	83.75	75.04	85.89	83.33	84.09	75.54	82.73	85.17	73.99	80.37	81.86	68.85	81.3	77.5	78.1	73.93	85.36	69.83	74.03	77.82	79.23	75.13	71.54	79.22	84.22
564.08	85.89	80.68	83.82	75.15	85.96	83.41	84.15	75.65	82.81	85.23	74.1	80.46	81.94	68.99	81.38	77.59	78.19	74.06	85.43	69.95	74.15	77.93	79.31	75.24	71.65	79.31	84.29
564.56	85.95	80.77	83.9	75.27	86.03	83.49	84.22	75.77	82.9	85.3	74.22	80.55	82.03	69.14	81.47	77.69	78.29	74.19	85.5	70.08	74.27	78.03	79.4	75.35	71.77	79.39	84.36
565.04	86.02	80.86	83.98	75.4	86.11	83.57	84.29	75.89	82.98	85.37	74.34	80.64	82.12	69.29	81.56	77.79	78.4	74.32	85.57	70.21	74.4	78.15	79.49	75.47	71.89	79.48	84.43
565.52	86.09	80.94	84.07	75.53	86.18	83.66	84.36	76.02	83.07	85.43	74.46	80.74	82.21	69.45	81.66	77.9	78.51	74.46	85.65	70.34	74.53	78.26	79.59	75.59	72.02	79.57	84.51
566.01	86.16	81.03	84.16	75.67	86.26	83.75	84.43	76.14	83.16	85.5	74.59	80.84	82.3	69.61	81.76	78	78.62	74.59	85.72	70.48	74.66	78.38	79.69	75.71	72.15	79.66	84.58
566.49	86.23	81.13	84.25	75.81	86.33	83.84	84.5	76.27	83.25	85.57	74.72	80.94	82.4	69.78	81.86	78.12	78.74	74.74	85.8	70.62	74.8	78.5	79.79	75.83	72.29	79.76	84.67
566.97	86.31	81.22	84.35	75.95	86.41	83.94	84.58	76.41	83.34	85.65	74.85	81.05	82.5	69.96	81.97	78.23	78.86	74.88	85.88	70.77	74.94	78.63	79.89	75.96	72.43	79.86	84.75
567.45	86.38	81.33	84.45	76.09	86.49	84.04	84.66	76.54	83.44	85.72	74.99	81.16	82.6	70.15	82.08	78.35	78.98	75.04	85.97	70.92	75.09	78.77	80.01	76.09	72.58	79.96	84.84
567.93	86.46	81.43	84.55	76.24	86.57	84.14	84.74	76.68	83.54	85.8	75.13	81.27	82.7	70.33	82.19	78.47	79.11	75.2	86.05	71.08	75.24	78.9	80.12	76.22	72.73	80.06	84.93
568.42	86.53	81.54	84.66	76.39	86.65	84.25	84.83	76.83	83.65	85.88	75.28	81.38	82.81	70.53	82.31	78.59	79.24	75.37	86.14	71.25	75.4	79.04	80.24	76.35	72.88	80.17	85.02
568.9	86.61	81.66	84.76	76.55	86.74	84.36	84.91	76.97	83.75	85.97	75.43	81.5	82.92	70.72	82.42	78.71	79.37	75.53	86.23	71.42	75.57	79.18	80.37	76.49	73.03	80.28	85.11
569.38	86.68	81.77	84.87	76.7	86.82	84.47	85	77.12	83.86	86.05	75.58	81.63	83.04	70.92	82.54	78.83	79.5	75.71	86.32	71.59	75.74	79.33	80.5	76.63	73.19	80.39	85.21
569.86	86.76	81.88	84.98	76.86	86.91	84.57	85.09	77.27	83.97	86.14	75.74	81.75	83.16	71.12	82.67	78.95	79.64	75.88	86.41	71.76	75.91	79.47	80.63	76.78	73.35	80.51	85.31
570.34	86.84	82	85.09	77.03	87	84.69	85.18	77.43	84.08	86.23	75.91	81.88	83.28	71.32	82.79	79.07	79.77	76.06	86.51	71.94	76.09	79.62	80.76	76.92	73.52	80.62	85.41
570.83	86.91	82.11	85.2	77.19	87.1	84.8	85.27	77.58	84.19	86.32	76.07	82.01	83.4	71.53	82.92	79.2	79.91	76.23	86.6	72.12	76.28	79.76	80.9	77.07	73.68	80.74	85.52
571.31	86.99	82.23	85.31	77.36	87.19	84.91	85.36	77.75	84.31	86.42	76.24	82.14	83.53	71.74	83.05	79.33	80.06	76.41	86.7	72.3	76.47	79.91	81.03	77.22	73.85	80.86	85.63
571.79	87.07	82.35	85.43	77.53	87.29	85.03	85.45	77.91	84.42	86.51	76.41	82.27	83.66	71.95	83.18	79.46	80.2	76.59	86.8	72.49	76.66	80.06	81.17	77.37	74.03	80.98	85.73
572.27	87.15	82.48	85.55	77.71	87.39	85.14	85.54	78.08	84.54	86.61	76.59	82.4	83.79	72.17	83.31	79.59	80.35	76.77	86.89	72.69	76.85	80.2	81.31	77.52	74.2	81.1	85.84
572.75	87.23	82.6	85.67	77.88	87.48	85.26	85.63	78.25	84.65	86.71	76.76	82.53	83.92	72.39	83.44	79.73	80.49	76.96	86.99	72.88	77.05	80.35	81.45	77.68	74.37	81.22	85.96
573.24	87.31	82.72	85.8	78.06	87.58	85.38	85.72	78.42	84.77	86.81	76.94	82.67	84.05	72.61	83.57	79.87	80.64	77.14	87.1	73.08	77.24	80.5	81.6	77.84	74.55	81.35	86.07
573.72	87.4	82.85	85.92	78.24	87.68	85.5	85.82	78.59	84.89	86.9	77.12	82.8	84.18	72.83	83.71	80.01	80.79	77.32	87.2	73.28	77.44	80.65	81.74	78	74.72	81.47	86.18
574.2	87.49	82.98	86.04	78.41	87.77	85.62	85.91	78.77	85.01	87	77.3	82.94	84.31	73.05	83.84	80.16	80.94	77.51	87.3	73.48	77.63	80.8	81.89	78.16	74.9	81.6	86.3
574.68	87.58	83.11	86.17	78.59	87.87	85.74	86.01	78.95	85.13	87.1	77.47	83.08	84.44	73.28	83.98	80.3	81.09	77.69	87.4	73.68	77.83	80.96	82.03	78.32	75.07	81.73	86.41
575.17	87.67	83.24	86.29	78.76	87.96	85.86	86.11	79.12	85.25	87.2	77.66	83.21	84.57	73.5	84.11	80.44	81.23	77.88	87.51	73.88	78.02	81.11	82.18	78.48	75.25	81.85	86.53
575.65	87.76	83.37	86.41	78.94	88.06	85.97	86.2	79.31	85.38	87.29	77.84	83.35	84.71	73.73	84.24	80.58	81.38	78.07	87.61	74.08	78.21	81.27	82.33	78.65	75.42	81.98	86.64
576.13	87.86	83.5	86.53	79.11	88.15	86.09	86.3	79.49	85.51	87.39	78.02	83.49	84.84	73.95	84.37	80.72	81.52	78.25	87.72	74.27	78.4	81.43	82.48	78.81	75.59	82.11	86.76
576.61	87.95	83.62	86.65	79.28	88.24	86.21	86.4	79.67	85.63	87.49	78.21	83.62	84.97	74.17	84.5	80.86	81.66	78.44	87.82	74.47	78.59	81.6	82.63	78.97	75.77	82.24	86.87
577.09	88.04	83.75	86.77	79.45	88.33	86.33	86.5	79.85	85.76	87.58	78.39	83.76	85.1	74.39	84.63	81	81.81	78.63	87.93	74.66	78.78	81.76	82.78	79.14	75.94	82.37	86.98
577.58	88.13	83.87	86.88	79.61	88.42	86.44	86.61	80.03	85.89	87.67	78.57	83.89	85.23	74.61	84.76	81.14	81.95	78.81	88.03	74.85	78.96	81.92	82.93	79.3	76.11	82.5	87.09
578.06	88.22	84	87	79.78	88.51	86.55	86.71	80.21	86.01	87.77	78.75	84.03	85.36	74.83	84.89	81.28	82.09	78.99	88.13	75.05	79.14	82.09	83.08	79.46	76.27	82.63	87.2
578.54	88.31	84.12	87.11	79.95	88.61	86.67	86.81	80.38	86.14	87.86	78.94	84.16	85.5	75.05	85.01	81.42	82.23	79.18	88.23	75.24	79.32	82.25	83.22	79.62	76.44	82.76	87.31
579.02	88.4	84.24	87.22	80.12	88.7	86.78	86.91	80.56	86.27	87.95	79.12	84.29	85.63	75.27	85.14	81.56	82.37	79.36	88.34	75.44	79.51	82.42	83.37	79.78	76.61	82.89	87.42
579.5	88.48	84.36	87.32	80.29	88.79	86.89	87.02	80.74	86.39	88.05	79.3	84.43	85.77	75.49	85.26	81.7	82.51	79.54	88.44	75.64	79.69	82.58	83.52	79.94	76.77	83.03	87.52
579.99	88.56	84.47	87.42	80.46	88.88	87	87.12	80.91	86.51	88.14	79.48	84.56	85.9	75.71	85.38	81.83	82.66	79.72	88.54	75.84	79.88	82.75	83.67	80.1	76.94	83.16	87.63
580.47	88.64	84.59	87.52	80.62	88.97	87.11	87.22	81.08	86.63	88.23	79.66	84.69	86.03	75.93	85.51	81.97	82.8	79.9	88.64	76.04	80.06	82.91	83.81	80.26	77.1	83.29	87.73
580.95	88.72	84.71	87.62	80.79	89.05	87.22	87.32	81.25	86.75	88.33	79.84	84.82	86.16	76.15	85.63	82.1	82.95	80.07	88.75	76.24	80.24	83.07	83.95	80.42	77.27	83.42	87.84
581.43	88.79	84.83	87.71	80.95	89.14	87.33	87.42	81.42	86.87	88.42	80.01	84.94	86.29	76.37	85.75	82.22	83.09	80.24	88.85	76.44	80.43	83.23	84.1	80.58	77.44	83.55	87.95
581.91	88.87	84.95	87.81	81.12	89.23	87.44	87.52	81.59	86.98	88.52	80.19	85.07	86.41	76.59	85.87	82.35	83.23	80.42	88.94	76.63	80.61	83.38	84.24	80.73	77.6	83.68	88.06
582.4	88.94	85.07	87.9	81.28	89.31	87.55	87.61	81.75	87.1	88.61	80.36	85.19	86.53	76.81	85.99	82.48	83.37	80.59	89.04	76.82	80.78	83.54	84.37	80.89	77.76	83.8	88.16
582.88	89.02	85.19	88	81.44	89.39	87.66	87.71	81.92	87.21	88.7	80.52	85.31	86.65	77.02	86.11	82.6	83.51	80.76	89.14	77.01	80.95	83.69	84.51	81.04	77.92	83.93	88.27
583.36	89.09	85.31	88.1	81.6	89.48	87.77	87.8	82.08	87.32	88.79	80.69	85.43	86.77	77.23	86.23	82.72	83.64	80.93	89.23	77.19	81.12	83.85	84.65	81.19	78.08	84.06	88.38
583.84	89.17	85.43	88.2	81.77	89.56	87.87	87.89	82.25	87.43	88.88	80.85	85.54	86.88	77.43	86.35	82.83	83.77	81.09	89.33	77.37	81.29	84	84.79	81.35	78.23	84.18	88.49
584.33	89.24	85.55	88.3	81.93	89.64	87.98	87.98	82.41	87.53	88.97	81.02	85.66	87	77.63	86.47	82.95	83.9	81.26	89.42	77.55	81.45	84.15	84.92	81.5	78.38	84.3	88.6
584.81	89.32	85.67	88.4	82.09	89.71	88.09	88.06	82.57	87.64	89.06	81.18	85.77	87.11	77.83	86.59	83.07	84.03	81.42	89.51	77.72	81.6	84.3	85.06	81.64	78.53	84.42	88.7
585.29	89.39	85.78	88.5	82.26	89.79	88.19	88.14	82.72	87.74	89.14	81.34	85.89	87.23	78.02	86.71	83.19	84.15	81.58	89.6	77.89	81.75	84.45	85.19	81.79	78.67	84.54	88.81
585.77	89.47	85.89	88.6	82.42	89.86	88.3	88.23	82.88	87.85	89.23	81.5	86	87.34	78.21	86.82	83.31	84.27	81.74	89.68	78.06	81.9	84.6	85.33	81.94	78.82	84.65	88.91
586.25	89.54	86	88.69	82.58	89.94	88.4	88.3	83.03	87.95	89.31	81.66	86.11	87.45	78.39	86.93	83.42	84.39	81.9	89.77	78.22	82.04	84.75	85.46	82.08	78.95	84.76	89.02
586.74	89.62	86.11	88.78	82.74	90.01	88.5	88.38	83.17	88.05	89.39	81.82	86.21	87.56	78.58	87.04	83.54	84.51	82.05	89.85	78.38	82.19	84.9	85.58	82.22	79.09	84.88	89.12
587.22	89.69	86.22	88.88	82.9	90.08	88.6	88.46	83.31	88.15	89.47	81.98	86.32	87.67	78.76	87.15	83.65	84.63	82.2	89.93	78.53	82.34	85.04	85.71	82.36	79.23	84.99	89.21
587.7	89.76	86.32	88.97	83.06	90.15	88.7	88.54	83.45	88.25	89.55	82.14	86.42	87.78	78.94	87.26	83.77	84.74	82.35	90.02	78.68	82.48	85.18	85.83	82.5	79.36	85.09	89.31
588.18	89.83	86.43	89.05	83.21	90.22	88.8	88.61	83.59	88.34	89.62	82.29	86.52	87.88	79.12	87.36	83.88	84.86	82.49	90.1	78.83	82.63	85.32	85.95	82.63	79.49	85.2	89.4
588.66	89.89	86.53	89.14	83.35	90.29	88.9	88.69	83.72	88.43	89.7	82.45	86.62	87.98	79.3	87.46	83.99	84.97	82.64	90.18	78.98	82.77	85.45	86.07	82.77	79.62	85.3	89.49
589.15	89.95	86.62	89.23	83.49	90.36	89	88.77	83.86	88.52	89.77	82.6	86.72	88.08	79.48	87.56	84.1	85.08	82.78	90.25	79.13	82.92	85.57	86.18	82.9	79.75	85.41	89.58
589.63	90.01	86.72	89.31	83.63	90.43	89.09	88.84	83.99	88.6	89.84	82.75	86.82	88.18	79.65	87.66	84.2	85.18	82.92	90.33	79.28	83.06	85.7	86.29	83.02	79.87	85.51	89.66
590.11	90.07	86.81	89.4	83.76	90.5	89.18	88.91	84.12	88.69	89.91	82.89	86.92	88.28	79.83	87.76	84.31	85.29	83.06	90.41	79.42	83.2	85.82	86.4	83.15	80	85.61	89.75
590.59	90.13	86.9	89.48	83.89	90.57	89.27	88.99	84.25	88.77	89.98	83.03	87.02	88.37	79.99	87.86	84.41	85.38	83.2	90.48	79.57	83.34	85.93	86.51	83.27	80.12	85.71	89.83
591.08	90.18	86.99	89.57	84.02	90.64	89.36	89.06	84.38	88.86	90.05	83.17	87.11	88.47	80.16	87.95	84.51	85.48	83.34	90.55	79.71	83.47	86.05	86.62	83.39	80.25	85.8	89.92
591.56	90.23	87.08	89.65	84.14	90.71	89.45	89.13	84.51	88.94	90.12	83.31	87.2	88.56	80.31	88.04	84.62	85.57	83.48	90.62	79.85	83.61	86.16	86.72	83.51	80.37	85.9	90
592.04	90.28	87.16	89.72	84.26	90.77	89.53	89.19	84.64	89.02	90.19	83.44	87.29	88.65	80.47	88.14	84.72	85.67	83.61	90.68	79.99	83.73	86.28	86.83	83.62	80.49	85.99	90.08
592.52	90.33	87.25	89.8	84.38	90.84	89.62	89.26	84.77	89.11	90.26	83.56	87.38	88.74	80.62	88.23	84.82	85.76	83.75	90.75	80.12	83.86	86.39	86.93	83.74	80.61	86.08	90.15
593	90.38	87.33	89.87	84.51	90.9	89.7	89.32	84.9	89.19	90.32	83.68	87.46	88.82	80.76	88.31	84.92	85.85	83.88	90.81	80.25	83.98	86.51	87.03	83.86	80.73	86.17	90.23
593.49	90.43	87.41	89.94	84.63	90.95	89.77	89.38	85.02	89.27	90.38	83.8	87.54	88.91	80.9	88.4	85.03	85.94	84.01	90.87	80.38	84.1	86.62	87.13	83.97	80.84	86.26	90.3
593.97	90.48	87.49	90.01	84.76	91.01	89.85	89.45	85.14	89.35	90.45	83.92	87.63	88.99	81.04	88.49	85.13	86.03	84.14	90.93	80.5	84.22	86.73	87.23	84.09	80.96	86.34	90.37
594.45	90.54	87.57	90.07	84.89	91.07	89.93	89.51	85.25	89.43	90.51	84.04	87.71	89.08	81.18	88.57	85.23	86.12	84.27	90.99	80.63	84.33	86.85	87.33	84.2	81.07	86.43	90.45
594.93	90.59	87.66	90.14	85.02	91.13	90	89.57	85.37	89.51	90.57	84.16	87.79	89.16	81.31	88.66	85.33	86.21	84.39	91.05	80.75	84.44	86.96	87.43	84.31	81.18	86.52	90.51
595.41	90.65	87.74	90.21	85.16	91.19	90.08	89.63	85.48	89.59	90.63	84.27	87.87	89.25	81.44	88.74	85.43	86.29	84.51	91.11	80.87	84.55	87.07	87.53	84.42	81.29	86.6	90.58
595.9	90.7	87.82	90.27	85.29	91.25	90.15	89.69	85.59	89.67	90.69	84.38	87.95	89.33	81.57	88.83	85.53	86.38	84.63	91.17	80.99	84.65	87.18	87.63	84.53	81.4	86.68	90.65
596.38	90.76	87.9	90.34	85.43	91.3	90.22	89.75	85.69	89.74	90.75	84.49	88.03	89.41	81.69	88.91	85.62	86.47	84.75	91.23	81.11	84.76	87.29	87.72	84.63	81.51	86.76	90.71
596.86	90.82	87.98	90.4	85.56	91.36	90.29	89.81	85.8	89.82	90.81	84.6	88.1	89.49	81.82	88.99	85.72	86.55	84.86	91.28	81.23	84.87	87.39	87.82	84.73	81.62	86.84	90.78
597.34	90.87	88.06	90.47	85.7	91.42	90.37	89.87	85.9	89.89	90.87	84.71	88.18	89.57	81.94	89.07	85.81	86.63	84.97	91.34	81.35	84.97	87.49	87.91	84.83	81.73	86.92	90.84
597.82	90.93	88.14	90.53	85.83	91.47	90.44	89.92	85.99	89.96	90.93	84.81	88.25	89.65	82.06	89.15	85.89	86.71	85.08	91.39	81.47	85.08	87.59	88.01	84.93	81.83	86.99	90.9
598.31	90.98	88.21	90.59	85.96	91.53	90.5	89.98	86.09	90.03	90.99	84.92	88.32	89.73	82.18	89.23	85.98	86.79	85.19	91.45	81.59	85.19	87.69	88.09	85.02	81.94	87.07	90.96
598.79	91.04	88.28	90.66	86.08	91.58	90.57	90.03	86.18	90.1	91.04	85.02	88.39	89.8	82.29	89.31	86.07	86.86	85.3	91.5	81.71	85.3	87.79	88.18	85.11	82.04	87.14	91.02
599.27	91.09	88.35	90.72	86.2	91.64	90.64	90.08	86.28	90.17	91.1	85.12	88.46	89.87	82.41	89.39	86.15	86.94	85.41	91.56	81.83	85.41	87.89	88.27	85.2	82.14	87.2	91.08
599.75	91.13	88.41	90.78	86.32	91.69	90.71	90.13	86.37	90.24	91.16	85.22	88.53	89.94	82.52	89.47	86.23	87.01	85.51	91.61	81.94	85.52	87.99	88.35	85.29	82.23	87.27	91.14
600.24	91.18	88.47	90.84	86.43	91.74	90.78	90.18	86.46	90.31	91.21	85.32	88.6	90.01	82.64	89.54	86.32	87.09	85.62	91.66	82.05	85.64	88.08	88.43	85.39	82.33	87.34	91.19
600.72	91.22	88.54	90.91	86.55	91.8	90.84	90.23	86.55	90.37	91.27	85.42	88.67	90.08	82.75	89.62	86.4	87.16	85.73	91.72	82.16	85.75	88.18	88.5	85.49	82.43	87.41	91.25
601.2	91.26	88.6	90.97	86.66	91.85	90.91	90.28	86.64	90.43	91.32	85.51	88.74	90.15	82.87	89.69	86.48	87.24	85.83	91.77	82.27	85.86	88.27	88.58	85.59	82.52	87.47	91.31
601.68	91.3	88.66	91.04	86.77	91.9	90.97	90.33	86.73	90.5	91.38	85.61	88.81	90.22	82.99	89.77	86.56	87.31	85.94	91.82	82.37	85.98	88.36	88.66	85.69	82.62	87.54	91.36
602.16	91.34	88.72	91.1	86.87	91.96	91.04	90.38	86.83	90.56	91.44	85.71	88.88	90.29	83.12	89.84	86.63	87.38	86.05	91.87	82.47	86.09	88.46	88.73	85.79	82.71	87.61	91.42
602.65	91.38	88.79	91.17	86.98	92.01	91.1	90.43	86.92	90.63	91.49	85.8	88.95	90.37	83.24	89.91	86.71	87.46	86.16	91.93	82.57	86.19	88.56	88.81	85.9	82.81	87.68	91.48
603.13	91.42	88.85	91.24	87.09	92.07	91.17	90.49	87.02	90.69	91.55	85.9	89.02	90.44	83.36	89.98	86.78	87.53	86.27	91.98	82.67	86.3	88.65	88.89	86	82.91	87.75	91.54
603.61	91.46	88.92	91.31	87.19	92.12	91.23	90.54	87.11	90.75	91.6	85.99	89.09	90.51	83.49	90.05	86.85	87.61	86.38	92.04	82.78	86.41	88.75	88.97	86.11	83	87.82	91.6
604.09	91.5	88.99	91.37	87.3	92.18	91.29	90.6	87.21	90.82	91.66	86.09	89.16	90.58	83.62	90.13	86.92	87.68	86.5	92.09	82.88	86.52	88.85	89.05	86.21	83.1	87.89	91.66
604.57	91.55	89.06	91.44	87.4	92.23	91.36	90.65	87.31	90.88	91.71	86.18	89.24	90.65	83.74	90.2	86.99	87.76	86.61	92.14	82.99	86.62	88.94	89.13	86.31	83.19	87.96	91.72
605.06	91.6	89.13	91.51	87.51	92.28	91.42	90.71	87.41	90.95	91.77	86.28	89.31	90.73	83.87	90.28	87.06	87.83	86.72	92.2	83.09	86.73	89.04	89.22	86.41	83.29	88.04	91.78
605.54	91.64	89.21	91.58	87.62	92.34	91.49	90.76	87.5	91.01	91.82	86.37	89.38	90.8	84	90.35	87.13	87.91	86.84	92.25	83.2	86.83	89.13	89.3	86.51	83.39	88.11	91.84
606.02	91.69	89.28	91.65	87.73	92.39	91.55	90.82	87.6	91.08	91.88	86.47	89.46	90.87	84.12	90.43	87.21	87.99	86.95	92.31	83.31	86.94	89.23	89.39	86.61	83.49	88.18	91.9
606.5	91.74	89.35	91.72	87.84	92.44	91.62	90.87	87.7	91.15	91.93	86.56	89.53	90.94	84.25	90.51	87.28	88.07	87.06	92.36	83.42	87.04	89.32	89.48	86.71	83.58	88.25	91.96
606.99	91.8	89.43	91.8	87.95	92.5	91.68	90.93	87.8	91.22	91.99	86.66	89.61	91.02	84.38	90.59	87.36	88.16	87.18	92.42	83.53	87.14	89.41	89.57	86.8	83.68	88.33	92.03
607.47	91.85	89.5	91.87	88.07	92.55	91.75	90.98	87.9	91.28	92.04	86.75	89.68	91.09	84.51	90.67	87.43	88.24	87.29	92.48	83.65	87.25	89.5	89.66	86.9	83.78	88.4	92.09
607.95	91.9	89.58	91.95	88.18	92.61	91.82	91.03	88	91.35	92.1	86.85	89.76	91.17	84.64	90.75	87.51	88.32	87.41	92.54	83.76	87.35	89.6	89.75	86.99	83.89	88.47	92.15
608.43	91.96	89.65	92.03	88.3	92.66	91.89	91.09	88.1	91.42	92.16	86.96	89.84	91.24	84.78	90.83	87.59	88.4	87.53	92.6	83.88	87.46	89.69	89.85	87.09	83.99	88.55	92.21
608.91	92.02	89.73	92.1	88.42	92.72	91.96	91.14	88.21	91.49	92.21	87.06	89.92	91.32	84.91	90.91	87.67	88.48	87.64	92.66	84	87.57	89.78	89.94	87.19	84.1	88.63	92.28
609.4	92.07	89.8	92.18	88.54	92.78	92.02	91.2	88.31	91.56	92.27	87.16	89.99	91.39	85.04	90.99	87.75	88.57	87.76	92.72	84.12	87.68	89.87	90.03	87.29	84.2	88.71	92.34
609.88	92.12	89.87	92.25	88.66	92.83	92.09	91.25	88.42	91.62	92.33	87.27	90.07	91.47	85.18	91.07	87.84	88.65	87.88	92.78	84.24	87.79	89.97	90.12	87.39	84.31	88.78	92.41
610.36	92.18	89.95	92.32	88.79	92.89	92.16	91.31	88.52	91.69	92.39	87.38	90.15	91.54	85.32	91.15	87.92	88.73	87.99	92.84	84.37	87.91	90.06	90.21	87.49	84.41	88.87	92.47
610.84	92.23	90.02	92.39	88.91	92.95	92.23	91.37	88.63	91.76	92.45	87.5	90.23	91.62	85.46	91.23	88.01	88.81	88.11	92.91	84.5	88.02	90.16	90.3	87.6	84.52	88.95	92.54
611.32	92.28	90.09	92.47	89.04	93.01	92.3	91.42	88.74	91.83	92.51	87.61	90.31	91.7	85.6	91.32	88.09	88.89	88.22	92.97	84.64	88.14	90.25	90.39	87.7	84.62	89.03	92.61
611.81	92.33	90.17	92.54	89.17	93.07	92.38	91.48	88.84	91.9	92.57	87.73	90.39	91.78	85.75	91.4	88.18	88.98	88.34	93.04	84.78	88.26	90.35	90.48	87.81	84.73	89.11	92.68
612.29	92.38	90.25	92.62	89.31	93.13	92.45	91.54	88.95	91.98	92.64	87.84	90.48	91.86	85.9	91.49	88.28	89.07	88.46	93.1	84.92	88.38	90.46	90.58	87.92	84.85	89.2	92.75
612.77	92.44	90.33	92.71	89.44	93.2	92.52	91.6	89.06	92.06	92.7	87.96	90.56	91.94	86.05	91.58	88.37	89.16	88.58	93.17	85.07	88.5	90.56	90.68	88.04	84.96	89.28	92.82
613.25	92.49	90.41	92.79	89.58	93.26	92.6	91.66	89.18	92.14	92.77	88.08	90.65	92.02	86.21	91.67	88.46	89.26	88.7	93.23	85.21	88.62	90.66	90.78	88.15	85.07	89.37	92.9
613.73	92.55	90.49	92.88	89.72	93.33	92.68	91.72	89.29	92.23	92.83	88.2	90.74	92.11	86.37	91.76	88.56	89.36	88.83	93.3	85.36	88.75	90.76	90.88	88.26	85.18	89.45	92.97
614.22	92.61	90.58	92.96	89.85	93.39	92.76	91.78	89.4	92.31	92.9	88.32	90.84	92.19	86.53	91.84	88.65	89.46	88.96	93.37	85.51	88.88	90.87	90.99	88.37	85.3	89.54	93.05
614.7	92.67	90.67	93.05	89.99	93.46	92.84	91.85	89.52	92.4	92.97	88.45	90.93	92.28	86.69	91.93	88.75	89.56	89.08	93.44	85.66	89.01	90.97	91.1	88.48	85.41	89.63	93.12
615.18	92.73	90.76	93.14	90.13	93.53	92.92	91.91	89.65	92.49	93.04	88.58	91.03	92.37	86.86	92.03	88.84	89.66	89.21	93.51	85.82	89.15	91.07	91.2	88.6	85.53	89.72	93.2
615.66	92.79	90.85	93.22	90.27	93.6	93	91.98	89.77	92.57	93.11	88.71	91.13	92.46	87.03	92.12	88.94	89.77	89.35	93.59	85.97	89.29	91.18	91.31	88.71	85.64	89.81	93.28
616.15	92.86	90.94	93.31	90.41	93.68	93.08	92.05	89.91	92.66	93.18	88.84	91.23	92.55	87.2	92.21	89.04	89.88	89.48	93.66	86.13	89.43	91.29	91.42	88.82	85.76	89.91	93.37
616.63	92.93	91.03	93.4	90.55	93.75	93.17	92.13	90.04	92.76	93.26	88.98	91.34	92.65	87.37	92.3	89.14	89.99	89.61	93.74	86.29	89.57	91.39	91.53	88.94	85.88	90	93.45
617.11	93	91.13	93.48	90.69	93.82	93.25	92.2	90.18	92.85	93.34	89.12	91.44	92.74	87.55	92.39	89.24	90.1	89.75	93.82	86.45	89.72	91.5	91.64	89.05	86.01	90.1	93.53
617.59	93.07	91.22	93.58	90.84	93.9	93.34	92.27	90.33	92.94	93.41	89.26	91.55	92.84	87.73	92.49	89.35	90.21	89.88	93.9	86.62	89.87	91.61	91.75	89.17	86.13	90.2	93.62
618.07	93.15	91.32	93.67	90.99	93.97	93.43	92.35	90.47	93.04	93.49	89.4	91.66	92.93	87.91	92.59	89.45	90.32	90.02	93.98	86.78	90.01	91.72	91.86	89.3	86.26	90.3	93.71
618.56	93.22	91.41	93.76	91.14	94.05	93.52	92.42	90.62	93.14	93.57	89.55	91.76	93.03	88.09	92.69	89.56	90.43	90.16	94.07	86.95	90.16	91.84	91.97	89.42	86.39	90.4	93.79
619.04	93.3	91.51	93.86	91.29	94.13	93.61	92.5	90.77	93.24	93.66	89.69	91.88	93.13	88.28	92.78	89.68	90.54	90.3	94.16	87.12	90.31	91.95	92.09	89.55	86.52	90.5	93.88
619.52	93.37	91.61	93.96	91.44	94.21	93.7	92.58	90.93	93.34	93.74	89.84	91.99	93.23	88.47	92.89	89.79	90.65	90.44	94.24	87.29	90.47	92.07	92.21	89.69	86.65	90.61	93.98
620	93.45	91.7	94.06	91.58	94.29	93.8	92.66	91.08	93.44	93.82	89.99	92.1	93.33	88.66	92.99	89.9	90.77	90.59	94.33	87.46	90.62	92.19	92.32	89.83	86.78	90.71	94.07
620.48	93.52	91.8	94.16	91.73	94.37	93.89	92.74	91.24	93.54	93.9	90.14	92.22	93.43	88.85	93.09	90.02	90.88	90.74	94.42	87.64	90.78	92.32	92.45	89.98	86.92	90.82	94.16
620.97	93.59	91.9	94.26	91.88	94.45	93.99	92.83	91.4	93.65	93.99	90.29	92.33	93.54	89.05	93.2	90.13	91	90.89	94.51	87.81	90.95	92.44	92.57	90.12	87.06	90.94	94.26
621.45	93.66	92	94.36	92.02	94.54	94.09	92.91	91.56	93.76	94.08	90.44	92.45	93.64	89.25	93.3	90.25	91.12	91.05	94.61	87.98	91.11	92.57	92.69	90.27	87.2	91.05	94.36
621.93	93.74	92.1	94.46	92.16	94.62	94.18	92.99	91.72	93.87	94.16	90.6	92.57	93.75	89.45	93.41	90.36	91.24	91.2	94.7	88.15	91.28	92.71	92.82	90.42	87.34	91.16	94.46
622.41	93.81	92.21	94.57	92.3	94.71	94.28	93.08	91.88	93.98	94.25	90.75	92.69	93.86	89.65	93.52	90.48	91.36	91.36	94.8	88.33	91.45	92.84	92.95	90.57	87.49	91.28	94.56
622.89	93.88	92.31	94.67	92.45	94.8	94.38	93.16	92.04	94.09	94.34	90.91	92.81	93.97	89.85	93.63	90.6	91.48	91.51	94.89	88.5	91.63	92.98	93.09	90.72	87.64	91.4	94.66
623.38	93.95	92.42	94.77	92.59	94.89	94.48	93.25	92.21	94.2	94.43	91.08	92.93	94.08	90.06	93.74	90.72	91.61	91.67	94.99	88.68	91.81	93.12	93.22	90.87	87.79	91.52	94.76
623.86	94.02	92.53	94.87	92.74	94.98	94.59	93.33	92.37	94.31	94.52	91.24	93.06	94.19	90.28	93.85	90.84	91.73	91.83	95.09	88.85	91.99	93.26	93.36	91.03	87.94	91.64	94.86
624.34	94.09	92.64	94.98	92.89	95.07	94.69	93.42	92.53	94.42	94.6	91.41	93.18	94.31	90.49	93.96	90.97	91.86	91.99	95.19	89.03	92.17	93.41	93.5	91.18	88.1	91.76	94.96
624.82	94.17	92.75	95.08	93.04	95.16	94.79	93.5	92.7	94.54	94.7	91.58	93.31	94.42	90.71	94.08	91.09	91.99	92.15	95.29	89.21	92.36	93.55	93.64	91.34	88.25	91.88	95.06
625.31	94.25	92.87	95.19	93.2	95.25	94.9	93.59	92.87	94.65	94.79	91.75	93.44	94.54	90.93	94.19	91.22	92.12	92.31	95.4	89.39	92.54	93.7	93.79	91.49	88.4	92	95.16
625.79	94.33	92.99	95.3	93.36	95.35	95.01	93.68	93.04	94.77	94.88	91.93	93.57	94.66	91.15	94.31	91.34	92.26	92.48	95.5	89.57	92.73	93.85	93.93	91.65	88.56	92.13	95.27
626.27	94.41	93.12	95.41	93.52	95.45	95.13	93.76	93.21	94.88	94.98	92.11	93.7	94.77	91.37	94.43	91.47	92.39	92.65	95.61	89.75	92.93	94	94.08	91.81	88.71	92.26	95.37
626.75	94.49	93.24	95.52	93.68	95.54	95.24	93.85	93.38	95	95.07	92.29	93.83	94.9	91.59	94.56	91.6	92.53	92.83	95.72	89.94	93.12	94.15	94.22	91.97	88.87	92.39	95.48
627.23	94.57	93.37	95.64	93.85	95.64	95.36	93.94	93.55	95.12	95.17	92.47	93.96	95.02	91.81	94.68	91.73	92.67	93	95.83	90.12	93.31	94.3	94.37	92.13	89.02	92.52	95.59
627.72	94.66	93.49	95.75	94.01	95.75	95.48	94.03	93.73	95.25	95.28	92.66	94.1	95.14	92.03	94.81	91.87	92.8	93.18	95.94	90.31	93.51	94.45	94.52	92.3	89.18	92.65	95.7
628.2	94.74	93.62	95.87	94.18	95.85	95.6	94.13	93.91	95.37	95.38	92.84	94.24	95.26	92.25	94.94	92	92.94	93.36	96.05	90.5	93.7	94.61	94.67	92.46	89.34	92.78	95.81
628.68	94.82	93.75	95.98	94.35	95.95	95.72	94.22	94.08	95.5	95.48	93.03	94.37	95.39	92.47	95.06	92.14	93.07	93.54	96.16	90.69	93.89	94.77	94.82	92.62	89.49	92.91	95.93
629.16	94.91	93.87	96.1	94.52	96.05	95.84	94.32	94.26	95.62	95.59	93.22	94.51	95.51	92.69	95.19	92.27	93.2	93.72	96.27	90.88	94.08	94.92	94.97	92.79	89.65	93.04	96.04
629.64	94.99	93.99	96.22	94.69	96.15	95.96	94.42	94.44	95.75	95.69	93.41	94.65	95.63	92.91	95.32	92.4	93.33	93.9	96.38	91.07	94.27	95.08	95.13	92.95	89.81	93.18	96.16
630.13	95.07	94.11	96.34	94.86	96.26	96.07	94.51	94.61	95.87	95.8	93.6	94.79	95.76	93.13	95.45	92.54	93.46	94.08	96.5	91.25	94.46	95.23	95.29	93.11	89.96	93.31	96.27
630.61	95.15	94.23	96.46	95.03	96.36	96.19	94.61	94.79	96	95.9	93.79	94.92	95.88	93.35	95.58	92.67	93.6	94.26	96.61	91.44	94.64	95.39	95.44	93.27	90.13	93.44	96.39
631.09	95.23	94.34	96.57	95.19	96.47	96.31	94.71	94.97	96.13	96.01	93.99	95.06	96.01	93.57	95.72	92.81	93.73	94.44	96.72	91.63	94.83	95.55	95.6	93.43	90.29	93.58	96.5
631.57	95.31	94.46	96.69	95.35	96.57	96.43	94.81	95.14	96.25	96.11	94.18	95.2	96.14	93.8	95.85	92.94	93.86	94.62	96.83	91.81	95.01	95.7	95.76	93.59	90.46	93.71	96.62
632.06	95.39	94.58	96.81	95.51	96.67	96.55	94.92	95.32	96.38	96.22	94.37	95.34	96.26	94.02	95.98	93.08	93.99	94.8	96.95	92	95.2	95.86	95.92	93.75	90.63	93.84	96.73
632.54	95.47	94.7	96.92	95.67	96.78	96.67	95.02	95.49	96.51	96.32	94.57	95.48	96.39	94.25	96.11	93.22	94.12	94.98	97.06	92.18	95.38	96.01	96.07	93.91	90.79	93.97	96.85
633.02	95.54	94.82	97.04	95.83	96.88	96.79	95.12	95.66	96.63	96.43	94.76	95.62	96.51	94.48	96.24	93.35	94.24	95.16	97.17	92.36	95.56	96.16	96.22	94.07	90.96	94.1	96.96
633.5	95.61	94.94	97.15	95.98	96.99	96.9	95.21	95.83	96.75	96.53	94.95	95.75	96.63	94.7	96.37	93.48	94.37	95.34	97.28	92.53	95.75	96.31	96.37	94.23	91.13	94.23	97.07
633.98	95.68	95.07	97.26	96.14	97.09	97.02	95.31	96	96.88	96.63	95.13	95.89	96.76	94.93	96.5	93.62	94.49	95.52	97.39	92.7	95.93	96.45	96.52	94.38	91.29	94.36	97.18
634.47	95.75	95.19	97.37	96.29	97.2	97.14	95.41	96.17	97	96.73	95.32	96.02	96.88	95.15	96.63	93.75	94.62	95.69	97.5	92.88	96.11	96.6	96.67	94.54	91.45	94.49	97.28
634.95	95.81	95.32	97.49	96.45	97.3	97.25	95.5	96.34	97.12	96.84	95.5	96.16	97	95.37	96.76	93.88	94.74	95.87	97.61	93.05	96.29	96.74	96.82	94.69	91.61	94.62	97.39
635.43	95.88	95.44	97.6	96.6	97.41	97.37	95.6	96.51	97.24	96.94	95.68	96.29	97.12	95.59	96.89	94.01	94.85	96.05	97.72	93.22	96.46	96.89	96.96	94.85	91.77	94.74	97.5
635.91	95.95	95.57	97.71	96.76	97.51	97.48	95.69	96.68	97.36	97.04	95.86	96.42	97.24	95.8	97.02	94.14	94.97	96.22	97.82	93.38	96.64	97.03	97.1	95	91.93	94.87	97.6
636.39	96.01	95.69	97.82	96.91	97.61	97.59	95.78	96.84	97.47	97.14	96.03	96.55	97.35	96.01	97.15	94.27	95.08	96.4	97.93	93.55	96.81	97.17	97.24	95.15	92.08	94.99	97.7
636.88	96.08	95.81	97.93	97.06	97.71	97.7	95.87	97.01	97.59	97.24	96.2	96.68	97.47	96.21	97.28	94.4	95.19	96.57	98.03	93.71	96.97	97.31	97.37	95.3	92.23	95.11	97.81
637.36	96.15	95.93	98.04	97.2	97.81	97.81	95.95	97.17	97.71	97.34	96.36	96.8	97.58	96.4	97.4	94.52	95.3	96.73	98.13	93.87	97.13	97.45	97.51	95.44	92.38	95.23	97.91
637.84	96.22	96.05	98.14	97.35	97.91	97.92	96.04	97.32	97.82	97.44	96.52	96.92	97.69	96.59	97.53	94.64	95.41	96.9	98.23	94.03	97.29	97.59	97.64	95.58	92.52	95.34	98.01
638.32	96.28	96.17	98.25	97.49	98.01	98.02	96.12	97.48	97.93	97.54	96.68	97.05	97.8	96.78	97.65	94.76	95.52	97.06	98.32	94.18	97.45	97.73	97.77	95.72	92.66	95.46	98.11
638.8	96.35	96.28	98.34	97.63	98.1	98.13	96.2	97.63	98.04	97.63	96.84	97.17	97.91	96.96	97.76	94.87	95.62	97.22	98.42	94.34	97.61	97.86	97.89	95.85	92.8	95.57	98.21
639.29	96.42	96.39	98.44	97.78	98.19	98.23	96.28	97.77	98.15	97.73	96.99	97.28	98.01	97.14	97.88	94.98	95.72	97.37	98.51	94.49	97.76	98	98.02	95.98	92.94	95.68	98.3
639.77	96.48	96.5	98.53	97.92	98.28	98.33	96.36	97.92	98.26	97.82	97.14	97.4	98.12	97.31	98	95.09	95.82	97.52	98.61	94.63	97.91	98.13	98.14	96.11	93.07	95.79	98.4
640.25	96.54	96.6	98.62	98.06	98.37	98.43	96.44	98.05	98.36	97.91	97.29	97.51	98.22	97.48	98.11	95.2	95.92	97.66	98.69	94.77	98.06	98.26	98.26	96.24	93.2	95.9	98.49
640.73	96.6	96.7	98.71	98.19	98.46	98.53	96.51	98.18	98.46	97.99	97.43	97.62	98.32	97.65	98.21	95.3	96.01	97.8	98.78	94.91	98.2	98.37	98.37	96.36	93.32	96	98.58
641.22	96.65	96.79	98.79	98.32	98.54	98.62	96.59	98.31	98.55	98.08	97.57	97.72	98.42	97.81	98.32	95.4	96.09	97.94	98.86	95.04	98.33	98.49	98.48	96.48	93.44	96.1	98.66
641.7	96.69	96.88	98.87	98.45	98.63	98.71	96.66	98.43	98.64	98.16	97.7	97.83	98.51	97.97	98.42	95.5	96.17	98.07	98.94	95.16	98.46	98.6	98.58	96.59	93.55	96.19	98.74
642.18	96.73	96.97	98.95	98.57	98.7	98.79	96.73	98.55	98.72	98.23	97.82	97.92	98.6	98.12	98.51	95.59	96.24	98.19	99.02	95.28	98.59	98.7	98.69	96.7	93.66	96.28	98.82
642.66	96.76	97.06	99.03	98.68	98.78	98.88	96.79	98.66	98.81	98.3	97.94	98.02	98.69	98.26	98.61	95.68	96.31	98.32	99.09	95.39	98.71	98.8	98.78	96.8	93.77	96.36	98.89
643.14	96.79	97.14	99.11	98.79	98.85	98.96	96.86	98.77	98.88	98.37	98.06	98.11	98.77	98.41	98.69	95.77	96.37	98.43	99.16	95.5	98.82	98.89	98.87	96.9	93.87	96.44	98.96
643.63	96.82	97.22	99.18	98.9	98.93	99.03	96.92	98.87	98.96	98.44	98.16	98.19	98.85	98.54	98.78	95.85	96.43	98.55	99.23	95.6	98.93	98.98	98.96	96.99	93.96	96.52	99.02
644.11	96.86	97.29	99.25	99	99	99.11	96.98	98.97	99.04	98.51	98.27	98.28	98.93	98.68	98.87	95.93	96.5	98.66	99.3	95.7	99.04	99.07	99.05	97.08	94.05	96.59	99.08
644.59	96.9	97.37	99.32	99.09	99.07	99.18	97.04	99.07	99.11	98.57	98.38	98.36	99.01	98.81	98.95	96.01	96.57	98.77	99.36	95.79	99.14	99.16	99.13	97.17	94.14	96.67	99.15
645.07	96.95	97.44	99.38	99.19	99.13	99.26	97.1	99.17	99.18	98.64	98.48	98.44	99.08	98.94	99.03	96.09	96.65	98.88	99.43	95.88	99.24	99.24	99.21	97.26	94.23	96.74	99.21
645.55	97.01	97.51	99.45	99.28	99.2	99.33	97.16	99.27	99.25	98.7	98.57	98.52	99.16	99.06	99.11	96.17	96.73	98.98	99.49	95.97	99.34	99.32	99.29	97.34	94.31	96.81	99.27
646.04	97.05	97.58	99.51	99.36	99.26	99.4	97.21	99.36	99.31	98.76	98.66	98.59	99.22	99.17	99.18	96.23	96.8	99.09	99.55	96.04	99.43	99.4	99.36	97.42	94.39	96.88	99.33
646.52	97.09	97.64	99.56	99.44	99.31	99.46	97.26	99.44	99.37	98.81	98.74	98.66	99.29	99.27	99.25	96.3	96.86	99.18	99.6	96.11	99.51	99.46	99.42	97.49	94.46	96.94	99.38
647	97.13	97.7	99.61	99.51	99.36	99.51	97.3	99.51	99.43	98.86	98.81	98.72	99.35	99.37	99.31	96.36	96.91	99.27	99.65	96.17	99.58	99.53	99.48	97.56	94.52	96.99	99.43
647.48	97.16	97.75	99.66	99.57	99.4	99.57	97.34	99.59	99.48	98.91	98.88	98.77	99.4	99.46	99.37	96.41	96.95	99.35	99.7	96.23	99.64	99.58	99.53	97.62	94.58	97.04	99.47
647.96	97.19	97.8	99.71	99.63	99.44	99.62	97.38	99.65	99.52	98.95	98.94	98.82	99.46	99.55	99.42	96.46	96.99	99.43	99.74	96.28	99.7	99.64	99.58	97.68	94.63	97.09	99.51
648.45	97.22	97.85	99.75	99.69	99.48	99.66	97.41	99.71	99.56	98.99	99	98.87	99.5	99.62	99.47	96.5	97.03	99.5	99.77	96.32	99.76	99.69	99.63	97.73	94.68	97.13	99.55
648.93	97.25	97.9	99.78	99.73	99.52	99.71	97.44	99.76	99.6	99.02	99.05	98.91	99.55	99.69	99.51	96.54	97.05	99.56	99.81	96.37	99.8	99.74	99.67	97.77	94.72	97.17	99.59
649.41	97.27	97.94	99.82	99.78	99.55	99.74	97.47	99.8	99.64	99.05	99.1	98.95	99.59	99.75	99.56	96.58	97.08	99.62	99.84	96.4	99.84	99.78	99.71	97.81	94.75	97.21	99.62
649.89	97.3	97.97	99.84	99.82	99.58	99.78	97.5	99.85	99.67	99.08	99.14	98.99	99.64	99.81	99.6	96.61	97.1	99.67	99.86	96.44	99.88	99.82	99.75	97.84	94.78	97.24	99.65
650.38	97.32	98	99.87	99.85	99.61	99.81	97.52	99.88	99.7	99.11	99.18	99.02	99.67	99.85	99.63	96.64	97.12	99.72	99.89	96.47	99.92	99.86	99.78	97.87	94.8	97.27	99.68
650.86	97.34	98.03	99.89	99.88	99.63	99.85	97.53	99.91	99.73	99.14	99.21	99.05	99.71	99.89	99.67	96.67	97.13	99.77	99.91	96.49	99.95	99.89	99.8	97.89	94.82	97.3	99.71
651.34	97.36	98.05	99.9	99.9	99.65	99.88	97.55	99.94	99.75	99.16	99.25	99.08	99.74	99.93	99.7	96.69	97.15	99.81	99.93	96.52	99.97	99.92	99.83	97.91	94.84	97.32	99.73
651.82	97.38	98.07	99.92	99.93	99.67	99.9	97.56	99.96	99.77	99.18	99.27	99.1	99.77	99.95	99.73	96.71	97.16	99.85	99.95	96.53	99.99	99.94	99.85	97.93	94.85	97.34	99.74
652.3	97.39	98.09	99.93	99.94	99.68	99.92	97.57	99.98	99.79	99.2	99.3	99.11	99.79	99.97	99.76	96.73	97.16	99.88	99.96	96.54	100	99.96	99.86	97.94	94.86	97.35	99.76
652.79	97.4	98.1	99.94	99.96	99.69	99.94	97.58	99.99	99.81	99.21	99.31	99.13	99.81	99.99	99.78	96.74	97.16	99.91	99.97	96.54	100	99.98	99.87	97.94	94.86	97.36	99.77
653.27	97.41	98.11	99.95	99.97	99.7	99.96	97.59	100	99.83	99.22	99.33	99.14	99.83	99.99	99.8	96.75	97.16	99.93	99.98	96.54	100	99.99	99.88	97.95	94.86	97.37	99.77
653.75	97.42	98.11	99.96	99.98	99.71	99.98	97.6	100	99.84	99.24	99.33	99.14	99.84	100	99.81	96.76	97.15	99.95	99.99	96.53	99.99	99.99	99.88	97.95	94.85	97.38	99.78
654.23	97.42	98.12	99.96	99.99	99.72	99.99	97.61	100	99.84	99.24	99.34	99.15	99.85	100	99.83	96.76	97.14	99.97	99.99	96.52	99.98	100	99.88	97.95	94.85	97.38	99.78
654.71	97.42	98.12	99.96	99.99	99.72	99.99	97.61	100	99.85	99.25	99.34	99.15	99.86	100	99.84	96.77	97.13	99.98	100	96.51	99.96	100	99.87	97.94	94.83	97.37	99.78
655.2	97.42	98.12	99.97	100	99.72	100	97.62	99.99	99.85	99.25	99.34	99.14	99.87	99.99	99.84	96.77	97.12	99.99	100	96.5	99.95	100	99.86	97.93	94.82	97.37	99.78
655.68	97.41	98.13	99.96	100	99.72	100	97.62	99.98	99.85	99.26	99.33	99.14	99.87	99.98	99.85	96.76	97.1	100	99.99	96.48	99.92	99.99	99.85	97.92	94.8	97.36	99.77
656.16	97.41	98.13	99.96	100	99.72	100	97.62	99.96	99.85	99.26	99.32	99.13	99.88	99.97	99.85	96.76	97.08	100	99.99	96.46	99.9	99.99	99.84	97.91	94.78	97.36	99.77
656.64	97.4	98.12	99.95	99.99	99.72	100	97.63	99.95	99.84	99.26	99.31	99.13	99.88	99.95	99.85	96.75	97.05	100	99.98	96.44	99.88	99.98	99.82	97.89	94.75	97.35	99.77
657.13	97.39	98.12	99.94	99.98	99.72	99.99	97.63	99.93	99.84	99.25	99.29	99.11	99.87	99.93	99.85	96.74	97.02	99.99	99.98	96.42	99.85	99.96	99.81	97.86	94.72	97.33	99.76
657.61	97.39	98.12	99.93	99.97	99.71	99.98	97.63	99.9	99.83	99.25	99.27	99.1	99.87	99.9	99.85	96.73	97	99.98	99.97	96.39	99.82	99.95	99.79	97.84	94.69	97.32	99.75
658.09	97.38	98.11	99.91	99.95	99.71	99.97	97.63	99.88	99.82	99.24	99.24	99.09	99.86	99.88	99.84	96.71	96.97	99.97	99.95	96.36	99.78	99.93	99.77	97.81	94.66	97.31	99.74
658.57	97.37	98.1	99.9	99.92	99.71	99.96	97.62	99.85	99.81	99.24	99.21	99.08	99.86	99.84	99.83	96.69	96.94	99.96	99.94	96.33	99.75	99.91	99.75	97.77	94.62	97.29	99.73
659.05	97.36	98.08	99.88	99.9	99.7	99.94	97.62	99.82	99.8	99.22	99.18	99.06	99.85	99.81	99.82	96.66	96.91	99.94	99.93	96.29	99.71	99.88	99.72	97.74	94.59	97.27	99.72
659.54	97.36	98.07	99.86	99.87	99.69	99.92	97.61	99.79	99.78	99.21	99.15	99.04	99.83	99.77	99.81	96.63	96.88	99.92	99.91	96.25	99.67	99.86	99.7	97.7	94.55	97.25	99.71
660.02	97.35	98.05	99.84	99.84	99.68	99.9	97.6	99.76	99.76	99.2	99.11	99.03	99.82	99.72	99.8	96.6	96.84	99.89	99.9	96.21	99.62	99.82	99.67	97.66	94.5	97.23	99.69
660.5	97.34	98.02	99.82	99.81	99.67	99.88	97.59	99.72	99.74	99.18	99.07	99.01	99.8	99.67	99.78	96.56	96.81	99.86	99.88	96.16	99.57	99.79	99.64	97.61	94.45	97.2	99.67
660.98	97.33	98	99.79	99.77	99.66	99.86	97.57	99.69	99.72	99.16	99.03	98.98	99.78	99.62	99.75	96.53	96.77	99.83	99.86	96.11	99.51	99.75	99.61	97.56	94.4	97.18	99.65
661.46	97.32	97.97	99.77	99.73	99.64	99.84	97.56	99.65	99.69	99.14	98.99	98.96	99.76	99.56	99.73	96.49	96.73	99.8	99.84	96.05	99.46	99.72	99.57	97.51	94.35	97.15	99.62
661.95	97.3	97.94	99.74	99.69	99.63	99.81	97.54	99.62	99.67	99.12	98.95	98.94	99.74	99.5	99.71	96.45	96.69	99.76	99.82	96	99.4	99.68	99.54	97.47	94.3	97.12	99.6
662.43	97.29	97.91	99.71	99.65	99.61	99.79	97.52	99.58	99.64	99.11	98.91	98.91	99.71	99.44	99.68	96.41	96.65	99.73	99.8	95.94	99.34	99.64	99.5	97.42	94.25	97.09	99.57
662.91	97.27	97.88	99.68	99.61	99.59	99.76	97.49	99.54	99.62	99.09	98.86	98.88	99.69	99.38	99.65	96.37	96.61	99.69	99.77	95.88	99.28	99.6	99.46	97.37	94.19	97.06	99.55
663.39	97.25	97.84	99.65	99.57	99.58	99.73	97.47	99.5	99.59	99.06	98.82	98.86	99.67	99.31	99.62	96.33	96.57	99.65	99.75	95.82	99.22	99.55	99.42	97.32	94.14	97.03	99.52
663.87	97.24	97.81	99.62	99.52	99.56	99.71	97.45	99.46	99.56	99.04	98.77	98.83	99.64	99.25	99.59	96.29	96.52	99.61	99.73	95.76	99.15	99.51	99.38	97.27	94.08	96.99	99.49
664.36	97.21	97.78	99.59	99.47	99.54	99.68	97.42	99.42	99.54	99.02	98.73	98.79	99.61	99.18	99.57	96.25	96.48	99.56	99.7	95.7	99.09	99.47	99.33	97.22	94.03	96.96	99.46
664.84	97.19	97.75	99.56	99.42	99.52	99.65	97.4	99.38	99.51	99	98.68	98.76	99.58	99.11	99.54	96.22	96.43	99.52	99.68	95.63	99.02	99.42	99.29	97.17	93.97	96.93	99.43
665.32	97.17	97.72	99.53	99.36	99.5	99.62	97.37	99.33	99.48	98.98	98.63	98.73	99.55	99.04	99.5	96.18	96.39	99.47	99.66	95.57	98.96	99.38	99.24	97.12	93.91	96.89	99.4
665.8	97.15	97.68	99.5	99.31	99.48	99.59	97.35	99.28	99.45	98.95	98.57	98.69	99.52	98.96	99.47	96.14	96.34	99.42	99.63	95.5	98.89	99.34	99.2	97.07	93.85	96.86	99.37
666.29	97.12	97.65	99.47	99.25	99.46	99.56	97.32	99.23	99.42	98.93	98.52	98.66	99.49	98.89	99.44	96.09	96.3	99.37	99.61	95.43	98.83	99.3	99.15	97.02	93.8	96.82	99.34
666.77	97.09	97.62	99.44	99.2	99.44	99.53	97.3	99.18	99.39	98.9	98.46	98.62	99.46	98.81	99.41	96.05	96.25	99.32	99.58	95.36	98.77	99.25	99.1	96.96	93.74	96.78	99.31
667.25	97.07	97.59	99.41	99.14	99.42	99.49	97.27	99.13	99.36	98.88	98.4	98.58	99.42	98.74	99.37	96	96.21	99.27	99.56	95.29	98.7	99.21	99.05	96.9	93.67	96.74	99.28
667.73	97.04	97.56	99.37	99.07	99.4	99.46	97.24	99.07	99.33	98.85	98.34	98.55	99.38	98.65	99.33	95.95	96.16	99.21	99.53	95.22	98.64	99.16	99.01	96.85	93.61	96.7	99.25
668.21	97.02	97.52	99.34	99.01	99.37	99.42	97.22	99.01	99.29	98.82	98.28	98.5	99.34	98.57	99.29	95.9	96.11	99.15	99.5	95.14	98.57	99.11	98.96	96.78	93.54	96.66	99.21
668.7	96.99	97.49	99.3	98.94	99.35	99.38	97.19	98.95	99.25	98.79	98.21	98.46	99.3	98.48	99.25	95.85	96.06	99.09	99.47	95.06	98.5	99.06	98.91	96.72	93.48	96.62	99.18
669.18	96.96	97.45	99.26	98.88	99.32	99.35	97.16	98.89	99.21	98.76	98.15	98.42	99.26	98.38	99.2	95.8	96.01	99.03	99.44	94.98	98.42	99	98.86	96.66	93.41	96.57	99.15
669.66	96.94	97.41	99.21	98.81	99.29	99.31	97.13	98.83	99.18	98.73	98.08	98.37	99.21	98.29	99.16	95.74	95.96	98.96	99.4	94.9	98.35	98.95	98.8	96.59	93.34	96.53	99.11
670.14	96.91	97.37	99.17	98.75	99.26	99.27	97.1	98.77	99.14	98.69	98.01	98.33	99.17	98.19	99.11	95.68	95.91	98.9	99.37	94.81	98.26	98.89	98.75	96.52	93.27	96.48	99.07
670.62	96.89	97.33	99.12	98.68	99.22	99.23	97.07	98.7	99.09	98.66	97.95	98.28	99.12	98.09	99.06	95.63	95.86	98.83	99.34	94.73	98.18	98.82	98.7	96.45	93.2	96.43	99.03
671.11	96.86	97.29	99.08	98.62	99.19	99.19	97.04	98.64	99.05	98.63	97.88	98.24	99.07	97.98	99.01	95.57	95.8	98.76	99.3	94.64	98.09	98.76	98.64	96.38	93.14	96.39	98.99
671.59	96.84	97.25	99.04	98.55	99.16	99.16	97.01	98.58	99.01	98.59	97.81	98.19	99.03	97.88	98.96	95.51	95.75	98.69	99.27	94.55	98	98.7	98.58	96.31	93.07	96.34	98.95
672.07	96.81	97.2	99	98.49	99.13	99.12	96.98	98.51	98.97	98.56	97.74	98.14	98.98	97.77	98.91	95.45	95.69	98.62	99.24	94.46	97.92	98.63	98.53	96.24	92.99	96.29	98.9
672.55	96.78	97.15	98.96	98.42	99.09	99.08	96.95	98.44	98.93	98.53	97.67	98.09	98.93	97.66	98.86	95.39	95.64	98.55	99.21	94.37	97.82	98.57	98.47	96.16	92.92	96.25	98.86
673.04	96.75	97.1	98.91	98.36	99.06	99.04	96.92	98.38	98.88	98.49	97.6	98.04	98.89	97.55	98.81	95.33	95.59	98.48	99.18	94.28	97.73	98.5	98.4	96.08	92.85	96.2	98.82
673.52	96.72	97.05	98.87	98.29	99.03	99	96.89	98.31	98.84	98.46	97.52	97.99	98.84	97.45	98.76	95.27	95.53	98.4	99.14	94.19	97.64	98.44	98.34	96.01	92.78	96.15	98.77
674	96.69	97	98.83	98.23	98.99	98.96	96.85	98.24	98.79	98.43	97.45	97.94	98.78	97.34	98.7	95.21	95.47	98.33	99.11	94.09	97.55	98.37	98.28	95.93	92.71	96.1	98.73
674.48	96.66	96.95	98.79	98.16	98.96	98.92	96.82	98.17	98.74	98.39	97.38	97.89	98.73	97.24	98.65	95.15	95.41	98.25	99.07	94	97.46	98.3	98.22	95.85	92.64	96.05	98.68
674.96	96.62	96.89	98.74	98.09	98.92	98.87	96.78	98.1	98.7	98.36	97.3	97.83	98.68	97.14	98.59	95.09	95.36	98.17	99.04	93.91	97.36	98.23	98.15	95.78	92.56	96	98.64
675.45	96.59	96.84	98.7	98.02	98.89	98.83	96.74	98.03	98.65	98.32	97.23	97.78	98.63	97.03	98.54	95.03	95.3	98.09	99	93.81	97.27	98.16	98.09	95.69	92.49	95.94	98.59
675.93	96.55	96.79	98.65	97.95	98.85	98.78	96.71	97.96	98.6	98.28	97.15	97.72	98.57	96.93	98.48	94.97	95.24	98.01	98.96	93.71	97.17	98.09	98.02	95.61	92.42	95.89	98.55
676.41	96.51	96.73	98.61	97.88	98.81	98.73	96.67	97.89	98.55	98.25	97.08	97.67	98.52	96.83	98.42	94.91	95.18	97.92	98.91	93.62	97.08	98.02	97.96	95.53	92.35	95.84	98.5
676.89	96.47	96.68	98.56	97.8	98.77	98.68	96.62	97.82	98.5	98.21	97	97.61	98.46	96.73	98.36	94.85	95.12	97.84	98.87	93.52	96.99	97.95	97.89	95.45	92.28	95.78	98.46
677.37	96.44	96.64	98.52	97.73	98.73	98.64	96.58	97.75	98.46	98.17	96.93	97.55	98.41	96.63	98.3	94.79	95.06	97.75	98.83	93.43	96.9	97.88	97.83	95.38	92.22	95.73	98.42
677.86	96.4	96.59	98.47	97.66	98.69	98.59	96.54	97.68	98.41	98.13	96.86	97.49	98.36	96.53	98.25	94.73	95	97.67	98.79	93.33	96.81	97.81	97.76	95.3	92.15	95.67	98.38
678.34	96.36	96.54	98.43	97.58	98.65	98.54	96.5	97.61	98.36	98.1	96.78	97.44	98.3	96.43	98.19	94.68	94.95	97.59	98.75	93.24	96.72	97.74	97.7	95.23	92.09	95.62	98.33
678.82	96.33	96.5	98.38	97.51	98.61	98.5	96.45	97.54	98.32	98.06	96.71	97.38	98.25	96.33	98.13	94.62	94.89	97.51	98.71	93.15	96.64	97.68	97.64	95.16	92.02	95.57	98.29
679.3	96.29	96.45	98.34	97.45	98.57	98.45	96.41	97.47	98.27	98.02	96.63	97.32	98.2	96.23	98.07	94.56	94.83	97.43	98.67	93.05	96.55	97.61	97.57	95.09	91.95	95.51	98.25
679.78	96.26	96.41	98.29	97.38	98.53	98.41	96.37	97.41	98.23	97.98	96.56	97.27	98.15	96.13	98.02	94.51	94.78	97.35	98.64	92.96	96.46	97.54	97.51	95.02	91.89	95.46	98.21
680.27	96.23	96.36	98.25	97.32	98.49	98.36	96.32	97.34	98.18	97.94	96.48	97.21	98.1	96.03	97.96	94.46	94.72	97.26	98.6	92.88	96.38	97.48	97.44	94.95	91.82	95.41	98.16
680.75	96.2	96.31	98.2	97.26	98.45	98.32	96.28	97.28	98.13	97.91	96.41	97.16	98.05	95.92	97.9	94.4	94.67	97.18	98.56	92.79	96.29	97.41	97.38	94.88	91.75	95.36	98.12
681.23	96.17	96.26	98.16	97.2	98.41	98.28	96.24	97.22	98.09	97.87	96.34	97.11	97.99	95.82	97.85	94.35	94.61	97.1	98.52	92.71	96.21	97.35	97.31	94.81	91.68	95.31	98.07
681.71	96.15	96.21	98.12	97.15	98.37	98.23	96.2	97.16	98.05	97.83	96.26	97.05	97.94	95.71	97.79	94.29	94.56	97.02	98.48	92.63	96.12	97.28	97.25	94.75	91.62	95.26	98.03
682.2	96.12	96.16	98.07	97.09	98.33	98.19	96.16	97.1	98	97.79	96.19	97	97.89	95.61	97.73	94.24	94.51	96.95	98.44	92.55	96.04	97.22	97.18	94.68	91.55	95.2	97.98
682.68	96.09	96.1	98.03	97.04	98.29	98.15	96.13	97.04	97.96	97.75	96.11	96.95	97.84	95.5	97.67	94.18	94.45	96.87	98.4	92.48	95.96	97.16	97.12	94.61	91.49	95.15	97.94
683.16	96.06	96.05	97.98	96.98	98.25	98.11	96.09	96.98	97.91	97.71	96.04	96.9	97.79	95.4	97.61	94.13	94.4	96.79	98.36	92.4	95.87	97.09	97.05	94.54	91.42	95.1	97.89
683.64	96.03	95.99	97.94	96.92	98.21	98.06	96.05	96.92	97.87	97.67	95.96	96.84	97.74	95.29	97.55	94.07	94.36	96.71	98.32	92.32	95.79	97.02	96.99	94.48	91.36	95.05	97.85
684.12	96	95.93	97.89	96.86	98.16	98.02	96.01	96.86	97.82	97.63	95.89	96.79	97.69	95.19	97.49	94.01	94.31	96.63	98.28	92.25	95.71	96.95	96.92	94.41	91.29	95	97.8
684.61	95.96	95.87	97.85	96.8	98.12	97.98	95.97	96.8	97.77	97.58	95.81	96.73	97.64	95.08	97.43	93.96	94.26	96.55	98.23	92.17	95.62	96.89	96.85	94.34	91.23	94.95	97.76
685.09	95.93	95.82	97.8	96.74	98.08	97.93	95.92	96.73	97.72	97.54	95.73	96.68	97.59	94.98	97.37	93.9	94.21	96.47	98.19	92.09	95.54	96.82	96.79	94.27	91.16	94.89	97.71
685.57	95.9	95.76	97.75	96.69	98.03	97.89	95.88	96.67	97.67	97.49	95.65	96.62	97.53	94.88	97.3	93.85	94.16	96.39	98.15	92.02	95.46	96.74	96.72	94.2	91.1	94.84	97.66
686.05	95.86	95.7	97.7	96.63	97.98	97.84	95.84	96.61	97.62	97.44	95.57	96.56	97.48	94.78	97.24	93.8	94.11	96.31	98.1	91.94	95.38	96.67	96.66	94.13	91.04	94.79	97.61
686.53	95.82	95.65	97.65	96.57	97.93	97.79	95.79	96.54	97.56	97.39	95.49	96.5	97.43	94.68	97.18	93.74	94.06	96.23	98.06	91.86	95.3	96.6	96.59	94.06	90.97	94.73	97.57
687.02	95.79	95.59	97.6	96.51	97.88	97.74	95.74	96.47	97.51	97.34	95.41	96.44	97.38	94.58	97.11	93.69	94.01	96.15	98.01	91.77	95.21	96.52	96.52	93.99	90.9	94.67	97.52
687.5	95.75	95.53	97.55	96.45	97.83	97.69	95.68	96.4	97.45	97.29	95.32	96.38	97.32	94.48	97.05	93.63	93.96	96.06	97.96	91.68	95.13	96.44	96.46	93.92	90.83	94.61	97.47
687.98	95.72	95.47	97.5	96.39	97.77	97.64	95.63	96.33	97.4	97.24	95.23	96.31	97.27	94.38	96.98	93.58	93.92	95.98	97.91	91.6	95.04	96.37	96.39	93.85	90.76	94.55	97.42
688.46	95.68	95.41	97.45	96.32	97.72	97.59	95.57	96.26	97.34	97.19	95.14	96.25	97.21	94.27	96.92	93.52	93.87	95.89	97.86	91.51	94.95	96.29	96.32	93.77	90.69	94.48	97.37
688.94	95.66	95.36	97.39	96.26	97.67	97.54	95.52	96.19	97.28	97.14	95.05	96.19	97.16	94.17	96.85	93.46	93.82	95.81	97.81	91.43	94.86	96.21	96.25	93.7	90.62	94.42	97.32
689.43	95.64	95.3	97.34	96.2	97.61	97.49	95.46	96.12	97.22	97.09	94.96	96.12	97.1	94.07	96.79	93.4	93.78	95.72	97.75	91.34	94.77	96.14	96.18	93.63	90.55	94.36	97.26
689.91	95.62	95.24	97.29	96.14	97.56	97.44	95.4	96.04	97.17	97.04	94.87	96.06	97.05	93.96	96.72	93.35	93.74	95.64	97.7	91.26	94.68	96.06	96.11	93.56	90.47	94.29	97.21
690.39	95.6	95.18	97.24	96.07	97.5	97.39	95.35	95.97	97.11	96.99	94.78	95.99	96.99	93.86	96.65	93.29	93.7	95.55	97.65	91.17	94.59	95.98	96.04	93.49	90.4	94.23	97.16
690.87	95.6	95.11	97.18	96.01	97.45	97.34	95.29	95.89	97.05	96.93	94.69	95.93	96.93	93.75	96.58	93.23	93.67	95.46	97.59	91.09	94.5	95.9	95.97	93.41	90.32	94.16	97.11
691.36	95.59	95.05	97.13	95.94	97.39	97.28	95.24	95.82	96.98	96.88	94.6	95.86	96.87	93.64	96.51	93.17	93.63	95.37	97.53	91	94.4	95.81	95.9	93.34	90.24	94.09	97.05
691.84	95.59	94.98	97.07	95.87	97.33	97.23	95.18	95.74	96.92	96.82	94.5	95.78	96.81	93.52	96.44	93.1	93.59	95.27	97.47	90.91	94.31	95.72	95.83	93.26	90.16	94.02	96.99
692.32	95.57	94.91	97.01	95.79	97.27	97.17	95.12	95.65	96.85	96.76	94.4	95.71	96.74	93.4	96.36	93.04	93.54	95.17	97.41	90.81	94.21	95.63	95.75	93.18	90.07	93.94	96.93
692.8	95.54	94.83	96.94	95.71	97.2	97.1	95.06	95.56	96.78	96.69	94.28	95.62	96.66	93.26	96.27	92.97	93.48	95.07	97.34	90.71	94.1	95.54	95.66	93.09	89.98	93.86	96.86
693.28	95.5	94.75	96.86	95.63	97.13	97.03	95	95.46	96.7	96.62	94.17	95.53	96.58	93.12	96.18	92.89	93.41	94.95	97.26	90.6	93.99	95.43	95.57	92.99	89.89	93.78	96.79
693.77	95.46	94.66	96.79	95.54	97.05	96.96	94.93	95.36	96.62	96.55	94.05	95.44	96.5	92.98	96.09	92.81	93.34	94.84	97.19	90.49	93.88	95.33	95.47	92.9	89.78	93.69	96.72
694.25	95.41	94.58	96.71	95.45	96.98	96.88	94.87	95.26	96.54	96.48	93.93	95.35	96.42	92.83	96	92.73	93.26	94.72	97.11	90.37	93.76	95.22	95.37	92.8	89.68	93.6	96.64
694.73	95.37	94.49	96.63	95.36	96.9	96.81	94.8	95.15	96.46	96.4	93.81	95.25	96.34	92.68	95.9	92.65	93.19	94.6	97.03	90.26	93.64	95.12	95.28	92.7	89.58	93.52	96.57
695.21	95.32	94.4	96.55	95.26	96.82	96.73	94.73	95.05	96.38	96.33	93.69	95.16	96.25	92.53	95.81	92.58	93.12	94.49	96.95	90.15	93.52	95.01	95.18	92.59	89.47	93.43	96.49
695.69	95.27	94.31	96.48	95.17	96.75	96.65	94.67	94.94	96.29	96.25	93.57	95.06	96.17	92.38	95.71	92.49	93.04	94.37	96.87	90.03	93.4	94.91	95.08	92.49	89.36	93.34	96.42
696.18	95.23	94.23	96.4	95.07	96.67	96.58	94.6	94.84	96.21	96.18	93.45	94.97	96.09	92.22	95.62	92.41	92.97	94.25	96.79	89.92	93.28	94.8	94.98	92.39	89.25	93.25	96.35
696.66	95.18	94.14	96.32	94.98	96.6	96.5	94.54	94.73	96.13	96.11	93.33	94.87	96.01	92.07	95.52	92.33	92.89	94.13	96.71	89.8	93.15	94.69	94.89	92.29	89.14	93.16	96.28
697.14	95.14	94.06	96.24	94.88	96.52	96.42	94.48	94.63	96.05	96.04	93.21	94.78	95.93	91.92	95.43	92.25	92.82	94.02	96.63	89.69	93.03	94.58	94.79	92.19	89.03	93.07	96.2
697.62	95.1	93.97	96.17	94.78	96.45	96.35	94.41	94.52	95.97	95.96	93.09	94.69	95.84	91.76	95.34	92.17	92.74	93.9	96.55	89.57	92.9	94.48	94.69	92.09	88.92	92.98	96.13
698.11	95.06	93.89	96.09	94.67	96.38	96.27	94.35	94.41	95.88	95.9	92.97	94.59	95.76	91.61	95.24	92.08	92.66	93.78	96.47	89.45	92.77	94.37	94.6	91.99	88.81	92.88	96.06
698.59	95.02	93.81	96.02	94.57	96.31	96.19	94.29	94.31	95.8	95.83	92.85	94.5	95.68	91.45	95.15	92	92.58	93.67	96.4	89.33	92.64	94.25	94.5	91.89	88.7	92.79	95.99
699.07	94.98	93.73	95.94	94.47	96.24	96.12	94.22	94.2	95.72	95.76	92.72	94.41	95.59	91.3	95.06	91.92	92.5	93.55	96.32	89.2	92.51	94.14	94.4	91.79	88.59	92.7	95.92
699.55	94.94	93.65	95.86	94.36	96.18	96.04	94.16	94.08	95.63	95.69	92.6	94.32	95.51	91.14	94.96	91.83	92.42	93.43	96.24	89.08	92.38	94.03	94.3	91.69	88.47	92.6	95.85
700.03	94.89	93.57	95.78	94.26	96.11	95.96	94.09	93.97	95.55	95.62	92.47	94.23	95.42	90.98	94.87	91.75	92.33	93.31	96.16	88.96	92.25	93.92	94.2	91.59	88.36	92.51	95.77
700.52	94.85	93.49	95.7	94.15	96.04	95.88	94.03	93.86	95.46	95.55	92.34	94.14	95.34	90.83	94.78	91.66	92.25	93.19	96.08	88.83	92.11	93.8	94.1	91.49	88.24	92.41	95.7
701	94.81	93.41	95.62	94.05	95.97	95.8	93.96	93.74	95.38	95.48	92.21	94.05	95.25	90.67	94.68	91.58	92.16	93.07	96	88.71	91.98	93.69	94	91.38	88.13	92.32	95.62
701.48	94.77	93.33	95.54	93.94	95.9	95.72	93.89	93.63	95.29	95.41	92.08	93.96	95.17	90.51	94.59	91.49	92.07	92.95	95.92	88.58	91.85	93.57	93.9	91.28	88.01	92.22	95.55
701.96	94.72	93.24	95.46	93.83	95.83	95.63	93.83	93.51	95.2	95.34	91.95	93.87	95.08	90.34	94.5	91.4	91.98	92.83	95.84	88.45	91.72	93.46	93.79	91.17	87.89	92.12	95.47
702.44	94.68	93.16	95.38	93.72	95.76	95.55	93.76	93.39	95.11	95.27	91.82	93.77	94.99	90.18	94.41	91.32	91.89	92.7	95.77	88.32	91.58	93.34	93.69	91.06	87.77	92.03	95.4
702.93	94.64	93.07	95.29	93.6	95.69	95.47	93.69	93.27	95.02	95.2	91.69	93.68	94.9	90.01	94.32	91.23	91.8	92.57	95.69	88.19	91.45	93.22	93.58	90.95	87.65	91.93	95.32
703.41	94.59	92.98	95.2	93.48	95.62	95.38	93.62	93.15	94.94	95.12	91.56	93.59	94.82	89.84	94.22	91.14	91.71	92.44	95.61	88.05	91.31	93.1	93.48	90.83	87.52	91.84	95.24
703.89	94.54	92.89	95.12	93.36	95.55	95.3	93.55	93.03	94.85	95.05	91.42	93.5	94.73	89.67	94.13	91.04	91.62	92.31	95.53	87.92	91.18	92.98	93.37	90.72	87.4	91.74	95.16
704.37	94.49	92.8	95.03	93.24	95.48	95.21	93.48	92.9	94.76	94.97	91.29	93.41	94.64	89.49	94.03	90.95	91.52	92.18	95.45	87.78	91.04	92.86	93.26	90.61	87.27	91.65	95.08
704.85	94.44	92.7	94.94	93.12	95.41	95.12	93.41	92.78	94.67	94.9	91.16	93.31	94.54	89.32	93.94	90.85	91.42	92.05	95.38	87.64	90.89	92.74	93.16	90.49	87.14	91.55	95
705.34	94.39	92.61	94.84	92.99	95.34	95.04	93.34	92.65	94.57	94.82	91.02	93.22	94.45	89.14	93.84	90.75	91.33	91.91	95.3	87.49	90.75	92.62	93.05	90.38	87.02	91.45	94.93
705.82	94.34	92.52	94.75	92.87	95.27	94.95	93.27	92.52	94.48	94.75	90.88	93.12	94.36	88.96	93.74	90.65	91.23	91.78	95.21	87.35	90.6	92.49	92.94	90.26	86.89	91.36	94.85
706.3	94.28	92.42	94.66	92.74	95.2	94.86	93.2	92.4	94.39	94.67	90.75	93.02	94.27	88.78	93.64	90.55	91.13	91.64	95.13	87.2	90.45	92.37	92.83	90.14	86.76	91.26	94.77
706.78	94.22	92.33	94.57	92.61	95.13	94.77	93.13	92.27	94.3	94.6	90.61	92.93	94.17	88.6	93.54	90.45	91.03	91.5	95.05	87.05	90.3	92.24	92.71	90.02	86.63	91.16	94.69
707.27	94.17	92.23	94.48	92.49	95.06	94.68	93.06	92.14	94.2	94.52	90.47	92.83	94.08	88.42	93.44	90.35	90.92	91.37	94.96	86.9	90.15	92.11	92.6	89.9	86.5	91.06	94.61
707.75	94.11	92.14	94.39	92.36	94.99	94.59	92.99	92.01	94.11	94.44	90.33	92.73	93.98	88.23	93.34	90.24	90.82	91.23	94.88	86.74	89.99	91.99	92.49	89.78	86.36	90.96	94.53
708.23	94.05	92.05	94.3	92.22	94.92	94.5	92.92	91.87	94.02	94.37	90.2	92.63	93.89	88.05	93.24	90.15	90.72	91.09	94.8	86.59	89.84	91.86	92.37	89.66	86.23	90.86	94.45
708.71	93.99	91.96	94.21	92.09	94.84	94.41	92.85	91.74	93.93	94.29	90.06	92.52	93.79	87.87	93.14	90.05	90.61	90.95	94.71	86.44	89.69	91.73	92.25	89.54	86.1	90.76	94.36
709.19	93.94	91.88	94.12	91.95	94.77	94.32	92.78	91.6	93.83	94.22	89.92	92.42	93.7	87.68	93.04	89.95	90.51	90.81	94.63	86.29	89.53	91.61	92.13	89.41	85.97	90.65	94.28
709.68	93.88	91.79	94.03	91.81	94.7	94.23	92.71	91.47	93.74	94.14	89.78	92.32	93.6	87.5	92.94	89.85	90.4	90.67	94.54	86.14	89.38	91.48	92.02	89.29	85.83	90.55	94.2
710.16	93.82	91.7	93.94	91.67	94.62	94.14	92.64	91.33	93.64	94.07	89.63	92.22	93.5	87.31	92.84	89.75	90.3	90.53	94.46	85.98	89.23	91.35	91.89	89.16	85.7	90.44	94.12
710.64	93.76	91.61	93.84	91.52	94.55	94.04	92.57	91.19	93.55	93.99	89.49	92.12	93.4	87.12	92.74	89.65	90.19	90.38	94.38	85.83	89.08	91.23	91.77	89.03	85.56	90.33	94.03
711.12	93.7	91.52	93.75	91.38	94.48	93.95	92.5	91.04	93.45	93.91	89.34	92.01	93.3	86.92	92.64	89.55	90.08	90.24	94.29	85.67	88.92	91.1	91.65	88.9	85.42	90.23	93.95
711.6	93.65	91.43	93.66	91.23	94.4	93.86	92.42	90.9	93.36	93.83	89.19	91.91	93.2	86.73	92.54	89.45	89.97	90.09	94.21	85.51	88.77	90.97	91.53	88.76	85.28	90.12	93.86
712.09	93.59	91.33	93.57	91.09	94.33	93.77	92.35	90.76	93.26	93.76	89.04	91.81	93.1	86.53	92.44	89.35	89.86	89.95	94.13	85.35	88.62	90.84	91.4	88.63	85.14	90.01	93.78
712.57	93.53	91.23	93.48	90.95	94.25	93.67	92.27	90.61	93.16	93.68	88.89	91.7	93	86.34	92.33	89.24	89.75	89.8	94.04	85.19	88.47	90.71	91.28	88.5	85	89.9	93.69
713.05	93.47	91.13	93.39	90.81	94.17	93.58	92.2	90.47	93.06	93.6	88.74	91.6	92.9	86.14	92.23	89.13	89.63	89.65	93.95	85.03	88.31	90.58	91.16	88.36	84.86	89.79	93.6
713.53	93.41	91.03	93.3	90.66	94.1	93.49	92.12	90.32	92.95	93.52	88.58	91.49	92.79	85.94	92.13	89.02	89.52	89.5	93.87	84.86	88.16	90.44	91.04	88.22	84.72	89.69	93.52
714.01	93.35	90.93	93.21	90.52	94.02	93.39	92.04	90.17	92.85	93.44	88.43	91.38	92.69	85.74	92.02	88.9	89.41	89.35	93.78	84.7	88	90.31	90.91	88.09	84.58	89.58	93.43
714.5	93.28	90.83	93.12	90.37	93.94	93.3	91.96	90.02	92.75	93.36	88.28	91.28	92.59	85.53	91.92	88.79	89.29	89.2	93.69	84.53	87.83	90.17	90.79	87.95	84.43	89.47	93.34
714.98	93.22	90.73	93.03	90.23	93.86	93.2	91.88	89.87	92.64	93.28	88.12	91.17	92.48	85.33	91.81	88.67	89.18	89.04	93.61	84.36	87.67	90.03	90.66	87.81	84.29	89.36	93.25
715.46	93.15	90.63	92.94	90.08	93.78	93.11	91.8	89.72	92.54	93.2	87.97	91.06	92.38	85.13	91.7	88.55	89.06	88.89	93.52	84.18	87.51	89.89	90.53	87.67	84.14	89.26	93.17
715.94	93.09	90.52	92.84	89.93	93.7	93.01	91.72	89.56	92.43	93.12	87.81	90.95	92.27	84.93	91.6	88.44	88.95	88.73	93.43	84.01	87.34	89.75	90.41	87.54	84	89.15	93.08
716.43	93.02	90.42	92.75	89.79	93.62	92.92	91.65	89.41	92.33	93.04	87.66	90.84	92.17	84.73	91.49	88.32	88.83	88.57	93.35	83.84	87.18	89.61	90.28	87.4	83.85	89.05	92.99
716.91	92.95	90.32	92.66	89.64	93.54	92.82	91.57	89.26	92.23	92.96	87.5	90.73	92.06	84.53	91.39	88.21	88.72	88.42	93.26	83.67	87.02	89.48	90.15	87.26	83.71	88.94	92.9
717.39	92.88	90.23	92.57	89.5	93.47	92.73	91.49	89.11	92.13	92.88	87.35	90.62	91.96	84.33	91.28	88.09	88.6	88.26	93.18	83.5	86.86	89.34	90.03	87.12	83.57	88.84	92.81
717.87	92.81	90.13	92.48	89.35	93.39	92.63	91.41	88.96	92.04	92.8	87.2	90.52	91.86	84.14	91.18	87.98	88.49	88.11	93.1	83.34	86.7	89.2	89.9	86.99	83.44	88.74	92.72
718.35	92.75	90.04	92.39	89.21	93.31	92.54	91.34	88.81	91.94	92.73	87.05	90.41	91.76	83.94	91.08	87.87	88.38	87.96	93.02	83.17	86.54	89.07	89.78	86.85	83.3	88.64	92.63
718.84	92.68	89.94	92.31	89.07	93.24	92.45	91.27	88.67	91.84	92.65	86.9	90.31	91.66	83.76	90.98	87.76	88.27	87.81	92.94	83.01	86.39	88.94	89.66	86.71	83.16	88.54	92.55
719.32	92.61	89.85	92.23	88.93	93.17	92.35	91.19	88.52	91.75	92.58	86.76	90.2	91.56	83.57	90.88	87.65	88.16	87.67	92.86	82.85	86.23	88.81	89.54	86.58	83.03	88.44	92.46
719.8	92.55	89.77	92.15	88.79	93.1	92.26	91.12	88.38	91.66	92.51	86.61	90.1	91.46	83.39	90.78	87.55	88.06	87.52	92.78	82.69	86.08	88.69	89.43	86.45	82.9	88.34	92.38
720.28	92.49	89.68	92.07	88.66	93.03	92.17	91.06	88.24	91.57	92.44	86.47	90.01	91.37	83.22	90.69	87.45	87.95	87.38	92.7	82.54	85.94	88.57	89.32	86.32	82.78	88.24	92.3
720.76	92.43	89.6	91.99	88.52	92.96	92.09	90.99	88.11	91.49	92.37	86.34	89.91	91.28	83.05	90.6	87.35	87.85	87.24	92.63	82.4	85.79	88.46	89.21	86.2	82.66	88.15	92.22
721.25	92.37	89.52	91.92	88.39	92.89	92	90.93	87.97	91.4	92.3	86.21	89.82	91.19	82.88	90.51	87.26	87.75	87.11	92.55	82.26	85.66	88.34	89.1	86.08	82.54	88.06	92.14
721.73	92.32	89.44	91.84	88.26	92.83	91.92	90.86	87.84	91.32	92.24	86.08	89.73	91.11	82.72	90.42	87.16	87.65	86.98	92.48	82.12	85.52	88.23	88.99	85.96	82.42	87.97	92.07
722.21	92.26	89.36	91.77	88.13	92.76	91.83	90.81	87.71	91.24	92.18	85.95	89.64	91.02	82.56	90.34	87.07	87.56	86.85	92.41	81.98	85.39	88.13	88.89	85.84	82.3	87.88	92
722.69	92.21	89.28	91.7	88	92.7	91.76	90.75	87.59	91.16	92.12	85.83	89.56	90.94	82.4	90.25	86.99	87.46	86.72	92.34	81.86	85.26	88.02	88.79	85.73	82.19	87.79	91.93
723.18	92.16	89.21	91.63	87.88	92.64	91.68	90.69	87.47	91.09	92.06	85.71	89.47	90.87	82.25	90.17	86.9	87.37	86.6	92.28	81.73	85.14	87.92	88.7	85.63	82.09	87.71	91.86
723.66	92.11	89.13	91.56	87.76	92.58	91.6	90.63	87.35	91.02	92	85.6	89.39	90.79	82.1	90.1	86.82	87.28	86.48	92.22	81.61	85.02	87.83	88.6	85.52	81.98	87.63	91.79
724.14	92.06	89.06	91.5	87.64	92.52	91.53	90.58	87.24	90.95	91.95	85.49	89.32	90.72	81.95	90.02	86.74	87.2	86.36	92.16	81.5	84.91	87.73	88.51	85.43	81.88	87.55	91.73
724.62	92.01	88.98	91.44	87.53	92.46	91.46	90.53	87.13	90.88	91.89	85.38	89.24	90.65	81.81	89.95	86.66	87.11	86.25	92.11	81.39	84.8	87.64	88.43	85.33	81.78	87.47	91.66
725.1	91.96	88.91	91.38	87.42	92.41	91.39	90.48	87.03	90.81	91.84	85.27	89.17	90.58	81.67	89.87	86.58	87.03	86.14	92.05	81.28	84.69	87.55	88.34	85.24	81.69	87.4	91.6
725.59	91.92	88.84	91.32	87.31	92.36	91.33	90.43	86.93	90.75	91.79	85.17	89.1	90.51	81.53	89.8	86.51	86.96	86.04	92	81.18	84.6	87.46	88.26	85.15	81.6	87.34	91.54
726.07	91.87	88.77	91.27	87.21	92.31	91.27	90.38	86.83	90.68	91.75	85.07	89.03	90.45	81.4	89.74	86.44	86.88	85.94	91.95	81.09	84.5	87.38	88.18	85.07	81.52	87.27	91.48
726.55	91.82	88.71	91.22	87.12	92.26	91.21	90.33	86.74	90.62	91.7	84.97	88.97	90.38	81.28	89.67	86.37	86.81	85.84	91.9	81	84.41	87.3	88.1	84.98	81.44	87.21	91.43
727.03	91.78	88.65	91.17	87.02	92.21	91.15	90.29	86.65	90.57	91.66	84.88	88.91	90.33	81.16	89.61	86.3	86.74	85.74	91.86	80.91	84.33	87.22	88.03	84.9	81.36	87.15	91.37
727.51	91.73	88.59	91.12	86.94	92.17	91.1	90.25	86.56	90.51	91.62	84.79	88.85	90.27	81.04	89.55	86.24	86.68	85.65	91.82	80.83	84.25	87.15	87.96	84.82	81.29	87.1	91.32
728	91.69	88.53	91.08	86.85	92.12	91.05	90.21	86.48	90.46	91.58	84.7	88.8	90.22	80.93	89.5	86.18	86.61	85.56	91.77	80.75	84.17	87.08	87.9	84.75	81.22	87.05	91.27
728.48	91.65	88.48	91.03	86.77	92.08	91	90.17	86.4	90.41	91.54	84.62	88.75	90.17	80.83	89.45	86.12	86.56	85.47	91.73	80.68	84.1	87.02	87.83	84.67	81.15	87	91.23
728.96	91.61	88.43	90.99	86.69	92.05	90.96	90.13	86.33	90.36	91.5	84.54	88.7	90.12	80.73	89.4	86.07	86.5	85.39	91.7	80.61	84.03	86.96	87.77	84.61	81.09	86.95	91.18
729.44	91.57	88.39	90.96	86.61	92.01	90.91	90.09	86.25	90.31	91.47	84.46	88.65	90.08	80.63	89.35	86.01	86.45	85.31	91.66	80.54	83.96	86.9	87.72	84.54	81.03	86.9	91.14
729.92	91.53	88.35	90.92	86.54	91.97	90.87	90.06	86.18	90.27	91.44	84.39	88.6	90.03	80.54	89.31	85.96	86.4	85.23	91.63	80.48	83.9	86.85	87.67	84.48	80.97	86.86	91.1
730.41	91.5	88.31	90.89	86.47	91.94	90.83	90.02	86.11	90.23	91.41	84.32	88.56	89.99	80.45	89.27	85.91	86.35	85.16	91.6	80.41	83.85	86.8	87.62	84.43	80.92	86.82	91.06
730.89	91.47	88.27	90.85	86.4	91.9	90.79	89.99	86.05	90.19	91.38	84.25	88.52	89.96	80.37	89.23	85.87	86.31	85.09	91.57	80.36	83.79	86.75	87.57	84.37	80.87	86.78	91.02
731.37	91.44	88.24	90.83	86.33	91.87	90.75	89.96	85.99	90.15	91.35	84.19	88.48	89.92	80.29	89.2	85.82	86.27	85.02	91.55	80.3	83.74	86.71	87.53	84.32	80.83	86.74	90.98
731.85	91.41	88.2	90.8	86.28	91.84	90.71	89.93	85.93	90.11	91.32	84.13	88.44	89.89	80.22	89.16	85.78	86.23	84.95	91.52	80.25	83.69	86.67	87.48	84.28	80.78	86.71	90.95
732.34	91.39	88.17	90.78	86.22	91.81	90.67	89.9	85.88	90.07	91.3	84.07	88.4	89.85	80.15	89.13	85.74	86.19	84.89	91.5	80.2	83.65	86.63	87.44	84.23	80.75	86.67	90.92
732.82	91.36	88.14	90.76	86.16	91.78	90.64	89.87	85.83	90.04	91.28	84.01	88.37	89.82	80.08	89.1	85.7	86.16	84.83	91.48	80.16	83.6	86.59	87.41	84.19	80.71	86.64	90.89
733.3	91.34	88.11	90.73	86.11	91.75	90.6	89.84	85.78	90	91.26	83.96	88.34	89.8	80.01	89.07	85.67	86.12	84.77	91.46	80.12	83.56	86.56	87.37	84.16	80.68	86.61	90.86
733.78	91.33	88.08	90.71	86.06	91.72	90.57	89.82	85.74	89.97	91.23	83.91	88.3	89.77	79.95	89.04	85.63	86.09	84.72	91.44	80.08	83.53	86.53	87.33	84.12	80.65	86.58	90.84
734.26	91.31	88.05	90.69	86.01	91.69	90.55	89.8	85.69	89.94	91.21	83.86	88.28	89.74	79.89	89.02	85.6	86.07	84.67	91.42	80.05	83.49	86.5	87.3	84.08	80.62	86.55	90.81
734.75	91.3	88.03	90.68	85.96	91.67	90.52	89.78	85.66	89.91	91.19	83.81	88.25	89.72	79.83	88.99	85.57	86.04	84.62	91.4	80.02	83.46	86.47	87.27	84.05	80.59	86.52	90.79
735.23	91.28	88	90.66	85.92	91.65	90.5	89.76	85.62	89.89	91.18	83.77	88.22	89.7	79.78	88.96	85.54	86.02	84.57	91.39	79.99	83.43	86.44	87.24	84.02	80.57	86.5	90.77
735.71	91.27	87.98	90.65	85.88	91.63	90.47	89.74	85.59	89.86	91.16	83.73	88.2	89.67	79.73	88.94	85.52	86	84.52	91.37	79.97	83.41	86.42	87.22	84	80.55	86.48	90.75
736.19	91.26	87.95	90.63	85.84	91.61	90.45	89.73	85.56	89.84	91.14	83.7	88.17	89.65	79.68	88.92	85.49	85.98	84.48	91.36	79.95	83.39	86.39	87.19	83.98	80.53	86.46	90.73
736.67	91.24	87.93	90.62	85.8	91.59	90.43	89.72	85.54	89.82	91.13	83.66	88.15	89.63	79.63	88.89	85.47	85.96	84.44	91.34	79.93	83.37	86.37	87.17	83.96	80.51	86.44	90.71
737.16	91.23	87.91	90.61	85.77	91.57	90.41	89.71	85.51	89.8	91.11	83.63	88.13	89.61	79.58	88.87	85.45	85.95	84.4	91.33	79.91	83.35	86.35	87.15	83.94	80.49	86.42	90.7
737.64	91.21	87.89	90.6	85.73	91.55	90.4	89.69	85.49	89.78	91.1	83.59	88.12	89.59	79.53	88.85	85.43	85.94	84.36	91.32	79.89	83.33	86.34	87.12	83.92	80.48	86.41	90.68
738.12	91.2	87.87	90.59	85.7	91.53	90.38	89.68	85.47	89.77	91.09	83.56	88.1	89.57	79.49	88.83	85.41	85.93	84.33	91.31	79.88	83.32	86.32	87.11	83.91	80.46	86.39	90.66
738.6	91.19	87.86	90.58	85.68	91.52	90.36	89.67	85.45	89.75	91.08	83.53	88.09	89.55	79.45	88.81	85.4	85.92	84.29	91.3	79.87	83.3	86.31	87.09	83.9	80.45	86.38	90.65
739.09	91.17	87.84	90.57	85.65	91.5	90.35	89.67	85.43	89.74	91.07	83.51	88.08	89.53	79.41	88.79	85.38	85.91	84.26	91.29	79.86	83.29	86.3	87.07	83.89	80.44	86.37	90.63
739.57	91.16	87.83	90.57	85.63	91.49	90.33	89.66	85.42	89.72	91.06	83.49	88.07	89.52	79.38	88.77	85.37	85.9	84.23	91.28	79.85	83.28	86.29	87.06	83.88	80.44	86.36	90.62
740.05	91.14	87.82	90.56	85.61	91.48	90.32	89.65	85.41	89.71	91.05	83.46	88.06	89.51	79.35	88.75	85.36	85.9	84.21	91.28	79.85	83.27	86.28	87.05	83.87	80.43	86.36	90.61
740.53	91.13	87.81	90.56	85.6	91.47	90.31	89.64	85.4	89.7	91.05	83.45	88.06	89.49	79.33	88.74	85.35	85.9	84.18	91.28	79.84	83.26	86.28	87.04	83.87	80.43	86.35	90.6
741.01	91.13	87.81	90.56	85.58	91.46	90.3	89.63	85.39	89.69	91.04	83.43	88.06	89.48	79.3	88.72	85.34	85.89	84.16	91.28	79.85	83.26	86.28	87.03	83.87	80.42	86.35	90.59
741.5	91.12	87.81	90.56	85.56	91.45	90.29	89.63	85.38	89.69	91.04	83.42	88.05	89.48	79.28	88.71	85.34	85.89	84.14	91.28	79.85	83.25	86.28	87.03	83.87	80.42	86.35	90.58
741.98	91.12	87.8	90.56	85.55	91.45	90.29	89.62	85.38	89.68	91.04	83.41	88.05	89.47	79.27	88.7	85.33	85.89	84.13	91.28	79.85	83.25	86.29	87.02	83.88	80.42	86.34	90.58
742.46	91.12	87.81	90.56	85.54	91.44	90.29	89.62	85.38	89.68	91.04	83.41	88.06	89.47	79.25	88.69	85.33	85.89	84.12	91.29	79.86	83.25	86.29	87.02	83.88	80.43	86.35	90.58
742.94	91.12	87.81	90.57	85.53	91.45	90.29	89.62	85.38	89.68	91.05	83.41	88.06	89.47	79.25	88.69	85.33	85.89	84.11	91.29	79.87	83.26	86.3	87.03	83.9	80.44	86.35	90.58
743.42	91.13	87.81	90.58	85.53	91.45	90.29	89.62	85.39	89.68	91.05	83.4	88.07	89.47	79.24	88.69	85.33	85.9	84.1	91.31	79.89	83.26	86.31	87.03	83.91	80.45	86.35	90.59
743.91	91.14	87.82	90.59	85.52	91.46	90.3	89.62	85.4	89.69	91.06	83.41	88.08	89.48	79.24	88.69	85.34	85.9	84.1	91.32	79.9	83.27	86.32	87.04	83.92	80.46	86.36	90.6
744.39	91.15	87.83	90.6	85.52	91.47	90.31	89.62	85.41	89.69	91.07	83.41	88.1	89.48	79.24	88.69	85.34	85.91	84.1	91.33	79.92	83.29	86.33	87.05	83.94	80.48	86.37	90.6
744.87	91.16	87.83	90.6	85.52	91.48	90.32	89.63	85.42	89.7	91.08	83.41	88.11	89.48	79.24	88.69	85.35	85.92	84.1	91.35	79.93	83.3	86.34	87.06	83.96	80.49	86.38	90.61
745.35	91.17	87.84	90.61	85.52	91.48	90.32	89.63	85.43	89.7	91.09	83.42	88.12	89.49	79.24	88.69	85.36	85.92	84.09	91.37	79.95	83.31	86.36	87.06	83.97	80.51	86.39	90.62
745.83	91.18	87.85	90.62	85.52	91.49	90.33	89.64	85.44	89.71	91.1	83.42	88.14	89.49	79.25	88.69	85.37	85.93	84.09	91.38	79.97	83.32	86.37	87.07	83.99	80.53	86.4	90.63
746.32	91.18	87.85	90.63	85.52	91.5	90.34	89.64	85.45	89.71	91.11	83.43	88.15	89.5	79.25	88.69	85.37	85.94	84.09	91.4	79.99	83.34	86.38	87.08	84.01	80.55	86.41	90.64
746.8	91.19	87.86	90.64	85.52	91.5	90.35	89.65	85.46	89.72	91.12	83.44	88.17	89.5	79.25	88.69	85.38	85.95	84.09	91.42	80.01	83.35	86.4	87.09	84.03	80.57	86.42	90.65
747.28	91.19	87.86	90.64	85.53	91.51	90.36	89.66	85.47	89.73	91.13	83.44	88.18	89.51	79.26	88.69	85.39	85.96	84.09	91.43	80.03	83.37	86.41	87.1	84.05	80.59	86.43	90.65
747.76	91.2	87.87	90.65	85.53	91.51	90.36	89.66	85.48	89.73	91.14	83.45	88.2	89.51	79.26	88.69	85.4	85.97	84.08	91.45	80.05	83.38	86.42	87.1	84.07	80.6	86.44	90.66
748.25	91.2	87.87	90.66	85.54	91.52	90.37	89.67	85.49	89.74	91.15	83.46	88.21	89.51	79.26	88.69	85.4	85.98	84.08	91.46	80.06	83.4	86.43	87.11	84.08	80.62	86.45	90.67
748.73	91.2	87.88	90.67	85.54	91.52	90.38	89.68	85.5	89.75	91.16	83.46	88.22	89.52	79.27	88.69	85.41	85.99	84.07	91.47	80.08	83.41	86.45	87.12	84.1	80.64	86.45	90.67
749.21	91.2	87.88	90.67	85.55	91.53	90.39	89.68	85.51	89.76	91.16	83.47	88.23	89.52	79.27	88.69	85.41	86	84.07	91.49	80.09	83.43	86.46	87.12	84.12	80.65	86.46	90.68
749.69	91.2	87.89	90.68	85.55	91.53	90.39	89.68	85.52	89.77	91.17	83.48	88.24	89.52	79.27	88.69	85.41	86.01	84.06	91.5	80.11	83.44	86.47	87.13	84.13	80.67	86.47	90.68
750.17	91.19	87.89	90.69	85.55	91.54	90.4	89.69	85.52	89.77	91.18	83.48	88.25	89.52	79.28	88.68	85.41	86.01	84.06	91.51	80.12	83.46	86.48	87.13	84.15	80.68	86.48	90.69
750.66	91.19	87.89	90.69	85.55	91.54	90.4	89.69	85.53	89.78	91.18	83.49	88.26	89.52	79.28	88.68	85.41	86.02	84.05	91.52	80.13	83.47	86.49	87.13	84.16	80.69	86.48	90.7
751.14	91.19	87.9	90.69	85.55	91.54	90.41	89.69	85.54	89.79	91.19	83.49	88.27	89.52	79.28	88.68	85.41	86.02	84.04	91.53	80.14	83.48	86.5	87.14	84.17	80.71	86.49	90.7
751.62	91.19	87.9	90.69	85.54	91.55	90.41	89.69	85.54	89.79	91.19	83.49	88.27	89.52	79.28	88.67	85.41	86.02	84.03	91.54	80.14	83.49	86.5	87.14	84.18	80.72	86.49	90.71
752.1	91.19	87.9	90.69	85.54	91.55	90.41	89.69	85.54	89.8	91.19	83.49	88.28	89.51	79.28	88.66	85.41	86.02	84.02	91.55	80.15	83.5	86.51	87.14	84.18	80.72	86.5	90.71
752.58	91.19	87.9	90.68	85.53	91.55	90.42	89.69	85.54	89.8	91.2	83.49	88.28	89.51	79.27	88.65	85.4	86.03	84.01	91.56	80.15	83.5	86.51	87.14	84.19	80.73	86.5	90.72
753.07	91.19	87.9	90.68	85.51	91.55	90.42	89.69	85.54	89.8	91.19	83.48	88.28	89.5	79.26	88.64	85.4	86.02	83.99	91.57	80.15	83.5	86.52	87.14	84.19	80.73	86.5	90.72
753.55	91.19	87.89	90.67	85.5	91.55	90.41	89.68	85.53	89.8	91.19	83.47	88.28	89.49	79.24	88.63	85.39	86.02	83.98	91.57	80.14	83.5	86.51	87.13	84.19	80.73	86.49	90.72
754.03	91.19	87.89	90.66	85.49	91.54	90.41	89.67	85.53	89.8	91.19	83.46	88.27	89.48	79.23	88.61	85.39	86.02	83.96	91.58	80.14	83.49	86.51	87.12	84.19	80.73	86.49	90.72
754.51	91.19	87.88	90.66	85.47	91.54	90.4	89.66	85.52	89.8	91.18	83.44	88.27	89.47	79.21	88.6	85.38	86.01	83.94	91.58	80.13	83.48	86.51	87.12	84.19	80.72	86.48	90.72
754.99	91.19	87.86	90.65	85.45	91.53	90.4	89.65	85.51	89.79	91.18	83.42	88.26	89.46	79.19	88.58	85.37	86	83.92	91.58	80.11	83.47	86.5	87.11	84.18	80.72	86.47	90.72
755.48	91.19	87.85	90.64	85.42	91.52	90.39	89.64	85.5	89.79	91.17	83.4	88.25	89.45	79.16	88.56	85.36	85.99	83.89	91.58	80.1	83.45	86.49	87.09	84.18	80.71	86.46	90.71
755.96	91.18	87.83	90.63	85.4	91.52	90.38	89.63	85.48	89.78	91.16	83.38	88.24	89.43	79.14	88.54	85.35	85.97	83.86	91.58	80.08	83.44	86.48	87.08	84.17	80.69	86.45	90.7
756.44	91.18	87.81	90.61	85.37	91.5	90.36	89.61	85.46	89.77	91.14	83.36	88.22	89.42	79.11	88.51	85.33	85.96	83.83	91.58	80.06	83.42	86.46	87.06	84.16	80.68	86.43	90.69
756.92	91.17	87.78	90.6	85.34	91.49	90.35	89.6	85.44	89.76	91.13	83.33	88.21	89.4	79.07	88.49	85.31	85.94	83.8	91.58	80.03	83.4	86.44	87.05	84.14	80.66	86.42	90.68
757.41	91.16	87.76	90.58	85.32	91.48	90.33	89.58	85.42	89.75	91.12	83.3	88.19	89.38	79.04	88.46	85.29	85.92	83.76	91.57	80	83.38	86.43	87.03	84.12	80.64	86.4	90.66
757.89	91.14	87.73	90.57	85.29	91.47	90.31	89.56	85.39	89.74	91.1	83.27	88.17	89.36	79	88.43	85.27	85.89	83.72	91.56	79.97	83.35	86.4	87	84.1	80.61	86.38	90.65
758.37	91.13	87.71	90.55	85.26	91.45	90.3	89.55	85.37	89.72	91.08	83.23	88.15	89.34	78.96	88.4	85.24	85.87	83.68	91.56	79.94	83.33	86.38	86.98	84.08	80.59	86.36	90.63
758.85	91.11	87.68	90.53	85.23	91.43	90.28	89.53	85.34	89.71	91.06	83.2	88.13	89.31	78.92	88.37	85.22	85.85	83.64	91.55	79.91	83.3	86.35	86.96	84.06	80.56	86.34	90.61
759.33	91.09	87.66	90.51	85.2	91.42	90.26	89.51	85.3	89.7	91.05	83.16	88.11	89.29	78.87	88.34	85.19	85.82	83.6	91.54	79.87	83.27	86.33	86.93	84.04	80.54	86.32	90.59
759.82	91.07	87.63	90.49	85.17	91.4	90.24	89.5	85.27	89.68	91.03	83.13	88.08	89.26	78.83	88.3	85.16	85.79	83.56	91.53	79.84	83.23	86.3	86.9	84.01	80.51	86.3	90.57
760.3	91.05	87.61	90.47	85.13	91.38	90.22	89.48	85.23	89.67	91.01	83.09	88.06	89.24	78.78	88.27	85.13	85.76	83.51	91.52	79.8	83.2	86.26	86.87	83.99	80.48	86.28	90.55
760.78	91.03	87.59	90.45	85.1	91.37	90.19	89.46	85.19	89.65	90.98	83.05	88.03	89.21	78.73	88.23	85.1	85.73	83.46	91.52	79.77	83.16	86.23	86.84	83.96	80.44	86.26	90.53
761.26	91	87.56	90.43	85.06	91.35	90.17	89.45	85.15	89.64	90.96	83.01	88	89.18	78.67	88.2	85.08	85.7	83.41	91.51	79.73	83.11	86.19	86.81	83.93	80.41	86.24	90.51
761.74	90.98	87.54	90.41	85.02	91.33	90.15	89.43	85.11	89.62	90.94	82.97	87.98	89.15	78.62	88.16	85.05	85.67	83.37	91.5	79.7	83.07	86.16	86.78	83.9	80.38	86.21	90.49
762.23	90.96	87.52	90.39	84.97	91.31	90.13	89.41	85.07	89.61	90.92	82.92	87.95	89.13	78.56	88.13	85.02	85.64	83.32	91.49	79.66	83.02	86.13	86.75	83.87	80.35	86.19	90.47
762.71	90.94	87.49	90.36	84.93	91.29	90.11	89.4	85.03	89.6	90.9	82.88	87.92	89.1	78.51	88.09	84.99	85.61	83.27	91.48	79.63	82.98	86.09	86.72	83.84	80.32	86.17	90.44
763.19	90.92	87.47	90.34	84.89	91.27	90.08	89.38	84.99	89.58	90.88	82.84	87.89	89.07	78.45	88.05	84.97	85.58	83.22	91.47	79.59	82.93	86.06	86.69	83.81	80.28	86.14	90.42
763.67	90.9	87.44	90.31	84.84	91.25	90.06	89.36	84.95	89.57	90.85	82.8	87.87	89.04	78.4	88.02	84.94	85.55	83.17	91.46	79.55	82.88	86.03	86.66	83.78	80.25	86.12	90.4
764.16	90.89	87.42	90.29	84.8	91.24	90.03	89.34	84.9	89.55	90.83	82.75	87.84	89.02	78.34	87.98	84.91	85.51	83.13	91.45	79.51	82.84	86	86.62	83.75	80.22	86.09	90.38
764.64	90.87	87.39	90.27	84.75	91.22	90.01	89.32	84.86	89.54	90.81	82.71	87.81	88.99	78.28	87.95	84.89	85.48	83.08	91.44	79.47	82.79	85.97	86.59	83.72	80.19	86.07	90.36
765.12	90.85	87.36	90.24	84.71	91.2	89.98	89.3	84.82	89.52	90.79	82.67	87.79	88.96	78.22	87.91	84.86	85.45	83.03	91.43	79.43	82.74	85.94	86.56	83.68	80.16	86.04	90.34
765.6	90.84	87.33	90.22	84.67	91.18	89.96	89.28	84.77	89.51	90.77	82.62	87.76	88.93	78.16	87.87	84.83	85.41	82.99	91.41	79.39	82.7	85.91	86.53	83.65	80.13	86.02	90.31
766.08	90.83	87.3	90.2	84.62	91.16	89.93	89.25	84.73	89.49	90.75	82.58	87.73	88.91	78.1	87.84	84.81	85.38	82.94	91.4	79.35	82.65	85.88	86.5	83.62	80.1	85.99	90.29
766.57	90.81	87.27	90.18	84.58	91.14	89.9	89.23	84.69	89.47	90.73	82.54	87.71	88.88	78.05	87.8	84.78	85.34	82.89	91.39	79.31	82.6	85.85	86.47	83.59	80.06	85.96	90.27
767.05	90.8	87.23	90.16	84.53	91.12	89.88	89.21	84.64	89.45	90.71	82.5	87.68	88.85	77.99	87.77	84.76	85.31	82.84	91.38	79.28	82.56	85.82	86.44	83.55	80.03	85.94	90.24
767.53	90.78	87.2	90.14	84.49	91.1	89.85	89.19	84.6	89.43	90.68	82.45	87.65	88.82	77.93	87.73	84.73	85.27	82.79	91.37	79.24	82.51	85.79	86.4	83.52	80	85.91	90.22
768.01	90.76	87.17	90.11	84.44	91.08	89.82	89.16	84.55	89.41	90.66	82.41	87.62	88.79	77.87	87.69	84.7	85.23	82.74	91.36	79.2	82.47	85.76	86.37	83.49	79.96	85.88	90.19
768.49	90.74	87.13	90.09	84.4	91.06	89.8	89.14	84.51	89.39	90.64	82.36	87.59	88.76	77.81	87.65	84.67	85.2	82.68	91.35	79.16	82.43	85.72	86.34	83.45	79.93	85.85	90.16
768.98	90.71	87.1	90.06	84.35	91.04	89.77	89.11	84.46	89.37	90.62	82.32	87.56	88.73	77.74	87.62	84.64	85.16	82.62	91.33	79.11	82.38	85.69	86.31	83.42	79.9	85.82	90.14
769.46	90.69	87.06	90.04	84.31	91.01	89.74	89.09	84.42	89.35	90.59	82.27	87.53	88.69	77.68	87.58	84.61	85.12	82.57	91.32	79.07	82.34	85.65	86.27	83.38	79.86	85.79	90.11
769.94	90.66	87.03	90.01	84.26	90.99	89.71	89.06	84.37	89.33	90.57	82.22	87.5	88.66	77.61	87.53	84.57	85.08	82.51	91.31	79.03	82.29	85.61	86.24	83.35	79.83	85.76	90.08
770.42	90.63	86.99	89.98	84.22	90.97	89.69	89.03	84.33	89.31	90.54	82.16	87.47	88.62	77.54	87.49	84.53	85.04	82.45	91.29	78.98	82.24	85.57	86.2	83.31	79.79	85.72	90.05
770.9	90.6	86.96	89.96	84.17	90.94	89.66	89.01	84.28	89.28	90.52	82.11	87.43	88.59	77.47	87.45	84.49	85	82.39	91.28	78.94	82.19	85.53	86.16	83.27	79.76	85.69	90.02
771.39	90.57	86.93	89.93	84.12	90.92	89.63	88.98	84.23	89.26	90.49	82.05	87.4	88.55	77.39	87.4	84.45	84.96	82.33	91.26	78.89	82.14	85.48	86.12	83.23	79.72	85.66	89.99
771.87	90.53	86.89	89.9	84.07	90.89	89.6	88.96	84.18	89.23	90.46	81.99	87.36	88.51	77.32	87.36	84.41	84.91	82.27	91.24	78.84	82.09	85.44	86.08	83.19	79.68	85.62	89.96
772.35	90.5	86.86	89.87	84.02	90.87	89.56	88.93	84.12	89.21	90.44	81.93	87.32	88.47	77.24	87.31	84.37	84.87	82.2	91.22	78.79	82.04	85.39	86.03	83.14	79.64	85.59	89.92
772.83	90.47	86.82	89.84	83.96	90.84	89.53	88.9	84.07	89.18	90.41	81.87	87.28	88.43	77.16	87.27	84.33	84.82	82.14	91.2	78.73	81.98	85.34	85.99	83.1	79.59	85.56	89.89
773.32	90.44	86.78	89.81	83.91	90.81	89.49	88.87	84.01	89.15	90.38	81.8	87.24	88.39	77.08	87.22	84.29	84.77	82.07	91.18	78.68	81.92	85.3	85.94	83.05	79.55	85.52	89.86
773.8	90.41	86.75	89.78	83.85	90.79	89.45	88.84	83.95	89.12	90.34	81.74	87.2	88.35	76.99	87.18	84.24	84.73	82	91.15	78.62	81.86	85.25	85.89	83	79.5	85.48	89.82
774.28	90.38	86.71	89.75	83.78	90.76	89.42	88.82	83.89	89.09	90.31	81.67	87.16	88.31	76.91	87.13	84.2	84.68	81.93	91.13	78.56	81.8	85.2	85.85	82.95	79.45	85.45	89.79
774.76	90.35	86.67	89.71	83.72	90.73	89.38	88.78	83.83	89.05	90.28	81.61	87.12	88.27	76.82	87.09	84.16	84.63	81.86	91.1	78.5	81.74	85.15	85.8	82.9	79.4	85.41	89.75
775.24	90.33	86.63	89.68	83.66	90.7	89.34	88.75	83.76	89.02	90.25	81.54	87.07	88.23	76.73	87.04	84.11	84.57	81.79	91.08	78.44	81.67	85.09	85.75	82.85	79.35	85.37	89.71
775.73	90.3	86.58	89.64	83.59	90.67	89.3	88.72	83.7	88.99	90.21	81.47	87.03	88.19	76.64	87	84.07	84.52	81.72	91.05	78.38	81.61	85.04	85.69	82.79	79.29	85.33	89.67
776.21	90.27	86.54	89.6	83.53	90.63	89.25	88.69	83.64	88.95	90.17	81.4	86.98	88.15	76.55	86.95	84.02	84.47	81.65	91.02	78.31	81.54	84.99	85.64	82.73	79.24	85.28	89.63
776.69	90.24	86.49	89.57	83.46	90.6	89.21	88.66	83.57	88.92	90.14	81.33	86.94	88.11	76.46	86.9	83.98	84.41	81.58	90.99	78.25	81.47	84.93	85.59	82.68	79.19	85.24	89.59
777.17	90.22	86.44	89.53	83.4	90.57	89.17	88.62	83.51	88.88	90.1	81.26	86.89	88.07	76.37	86.85	83.93	84.36	81.5	90.96	78.19	81.4	84.88	85.53	82.62	79.13	85.2	89.55
777.65	90.19	86.39	89.49	83.33	90.53	89.13	88.59	83.45	88.84	90.07	81.19	86.84	88.02	76.28	86.8	83.88	84.3	81.43	90.93	78.12	81.33	84.82	85.48	82.56	79.08	85.15	89.5
778.14	90.15	86.35	89.46	83.27	90.5	89.08	88.56	83.38	88.8	90.03	81.12	86.8	87.98	76.18	86.75	83.84	84.24	81.36	90.9	78.06	81.26	84.77	85.42	82.51	79.02	85.1	89.46
778.62	90.12	86.3	89.42	83.2	90.46	89.04	88.52	83.32	88.76	89.99	81.05	86.75	87.94	76.09	86.71	83.79	84.19	81.29	90.87	78	81.2	84.71	85.37	82.45	78.97	85.06	89.42
779.1	90.09	86.25	89.39	83.14	90.43	89	88.49	83.26	88.72	89.96	80.98	86.7	87.9	76	86.66	83.74	84.13	81.22	90.84	77.93	81.13	84.66	85.31	82.39	78.91	85.01	89.37
779.58	90.06	86.21	89.35	83.08	90.39	88.96	88.45	83.2	88.69	89.92	80.91	86.66	87.86	75.92	86.61	83.7	84.08	81.15	90.81	77.87	81.06	84.6	85.26	82.33	78.86	84.97	89.33
780.06	90.02	86.16	89.32	83.02	90.36	88.93	88.42	83.15	88.65	89.89	80.84	86.62	87.81	75.83	86.56	83.65	84.02	81.08	90.78	77.81	80.99	84.55	85.2	82.28	78.81	84.92	89.29
780.55	89.99	86.12	89.28	82.96	90.32	88.89	88.39	83.09	88.61	89.85	80.78	86.57	87.77	75.74	86.51	83.61	83.97	81.02	90.75	77.75	80.93	84.5	85.15	82.22	78.75	84.88	89.25
781.03	89.96	86.08	89.25	82.9	90.29	88.85	88.36	83.03	88.57	89.82	80.71	86.53	87.73	75.66	86.47	83.56	83.92	80.95	90.72	77.68	80.87	84.44	85.1	82.17	78.7	84.84	89.21
781.51	89.92	86.04	89.22	82.85	90.26	88.82	88.32	82.98	88.54	89.79	80.65	86.49	87.69	75.58	86.42	83.52	83.87	80.89	90.69	77.62	80.81	84.39	85.05	82.12	78.65	84.8	89.17
781.99	89.89	86	89.18	82.8	90.23	88.78	88.29	82.93	88.51	89.76	80.59	86.46	87.66	75.5	86.38	83.48	83.83	80.83	90.66	77.56	80.75	84.35	85.01	82.07	78.6	84.76	89.13
782.48	89.86	85.96	89.15	82.75	90.2	88.75	88.27	82.88	88.48	89.73	80.53	86.42	87.62	75.42	86.34	83.44	83.78	80.77	90.64	77.51	80.69	84.3	84.96	82.02	78.56	84.73	89.1
782.96	89.83	85.93	89.12	82.71	90.17	88.72	88.24	82.83	88.45	89.71	80.47	86.39	87.59	75.35	86.29	83.4	83.74	80.71	90.62	77.45	80.64	84.26	84.92	81.98	78.51	84.69	89.07
783.44	89.81	85.9	89.09	82.66	90.15	88.69	88.21	82.78	88.42	89.68	80.42	86.36	87.55	75.28	86.26	83.36	83.7	80.66	90.59	77.4	80.59	84.21	84.88	81.94	78.47	84.66	89.03
783.92	89.78	85.86	89.06	82.62	90.12	88.66	88.19	82.74	88.39	89.66	80.37	86.34	87.52	75.21	86.22	83.33	83.66	80.6	90.57	77.35	80.54	84.17	84.84	81.9	78.43	84.63	89
784.4	89.76	85.83	89.03	82.58	90.1	88.63	88.16	82.69	88.37	89.64	80.32	86.31	87.49	75.15	86.18	83.3	83.62	80.55	90.56	77.3	80.49	84.14	84.81	81.86	78.4	84.6	88.98
784.89	89.74	85.8	89	82.55	90.07	88.6	88.14	82.65	88.35	89.62	80.27	86.29	87.46	75.09	86.15	83.27	83.59	80.51	90.54	77.26	80.45	84.1	84.77	81.82	78.36	84.58	88.95
785.37	89.72	85.77	88.98	82.51	90.05	88.58	88.12	82.61	88.32	89.6	80.23	86.26	87.44	75.04	86.12	83.23	83.55	80.46	90.52	77.22	80.41	84.07	84.74	81.79	78.33	84.55	88.92
785.85	89.71	85.75	88.96	82.48	90.03	88.56	88.1	82.58	88.3	89.58	80.19	86.24	87.41	74.99	86.09	83.21	83.52	80.42	90.51	77.18	80.37	84.04	84.71	81.76	78.3	84.53	88.9
786.33	89.7	85.72	88.93	82.45	90.01	88.54	88.09	82.54	88.28	89.56	80.15	86.22	87.39	74.94	86.06	83.18	83.49	80.38	90.49	77.15	80.33	84.01	84.68	81.73	78.28	84.51	88.88
786.81	89.69	85.69	88.91	82.42	89.99	88.52	88.07	82.51	88.26	89.55	80.12	86.21	87.37	74.9	86.04	83.15	83.46	80.35	90.48	77.12	80.3	83.98	84.66	81.7	78.25	84.49	88.85
787.3	89.68	85.67	88.89	82.4	89.98	88.5	88.06	82.48	88.25	89.53	80.08	86.19	87.35	74.86	86.02	83.13	83.44	80.32	90.47	77.09	80.27	83.95	84.63	81.68	78.23	84.48	88.83
787.78	89.67	85.65	88.87	82.38	89.97	88.49	88.04	82.46	88.23	89.52	80.06	86.17	87.34	74.83	86	83.11	83.41	80.28	90.46	77.06	80.24	83.93	84.61	81.66	78.21	84.46	88.82
788.26	89.66	85.63	88.85	82.36	89.95	88.48	88.03	82.43	88.21	89.5	80.03	86.16	87.32	74.79	85.98	83.09	83.39	80.26	90.45	77.04	80.22	83.9	84.59	81.64	78.2	84.44	88.8
788.74	89.66	85.61	88.83	82.34	89.94	88.46	88.02	82.41	88.2	89.49	80.01	86.14	87.31	74.76	85.96	83.07	83.37	80.23	90.44	77.02	80.2	83.88	84.57	81.62	78.18	84.43	88.78
789.23	89.65	85.59	88.82	82.33	89.93	88.45	88.01	82.39	88.19	89.48	79.99	86.13	87.3	74.74	85.95	83.06	83.36	80.21	90.43	77	80.17	83.86	84.55	81.6	78.17	84.42	88.77
789.71	89.64	85.57	88.8	82.31	89.93	88.45	88	82.37	88.18	89.48	79.97	86.12	87.29	74.71	85.93	83.05	83.34	80.19	90.43	76.98	80.15	83.84	84.53	81.59	78.16	84.41	88.76
790.19	89.63	85.56	88.79	82.3	89.92	88.44	87.99	82.36	88.17	89.47	79.95	86.11	87.28	74.69	85.92	83.04	83.33	80.17	90.42	76.96	80.14	83.83	84.52	81.57	78.16	84.4	88.75
790.67	89.62	85.54	88.78	82.3	89.91	88.43	87.98	82.34	88.16	89.46	79.93	86.1	87.28	74.67	85.91	83.03	83.32	80.15	90.42	76.94	80.12	83.81	84.5	81.56	78.15	84.39	88.74
791.15	89.61	85.53	88.77	82.29	89.91	88.42	87.97	82.33	88.15	89.46	79.92	86.1	87.27	74.65	85.9	83.01	83.31	80.13	90.41	76.93	80.1	83.8	84.49	81.55	78.14	84.38	88.73
791.64	89.6	85.52	88.76	82.28	89.9	88.42	87.96	82.32	88.15	89.46	79.91	86.09	87.27	74.63	85.89	83	83.3	80.12	90.41	76.91	80.09	83.79	84.47	81.54	78.14	84.38	88.73
792.12	89.59	85.52	88.75	82.28	89.89	88.41	87.96	82.31	88.14	89.45	79.9	86.09	87.26	74.62	85.88	82.99	83.29	80.11	90.4	76.9	80.08	83.78	84.46	81.53	78.13	84.37	88.72
792.6	89.58	85.51	88.74	82.27	89.89	88.41	87.95	82.31	88.14	89.45	79.89	86.09	87.26	74.61	85.87	82.98	83.28	80.09	90.39	76.88	80.06	83.77	84.45	81.52	78.13	84.37	88.72
793.08	89.57	85.5	88.74	82.27	89.88	88.41	87.94	82.3	88.14	89.45	79.88	86.08	87.26	74.6	85.86	82.97	83.28	80.09	90.39	76.86	80.05	83.76	84.44	81.51	78.12	84.36	88.71
793.56	89.56	85.5	88.73	82.27	89.88	88.41	87.93	82.29	88.14	89.45	79.87	86.08	87.25	74.59	85.85	82.95	83.27	80.08	90.38	76.84	80.04	83.75	84.43	81.5	78.11	84.36	88.71
794.05	89.55	85.49	88.72	82.27	89.87	88.41	87.92	82.28	88.13	89.44	79.86	86.08	87.25	74.58	85.84	82.94	83.26	80.07	90.37	76.82	80.03	83.74	84.42	81.5	78.1	84.35	88.7
794.53	89.54	85.48	88.71	82.26	89.86	88.4	87.91	82.28	88.13	89.44	79.84	86.07	87.25	74.57	85.84	82.92	83.25	80.06	90.37	76.8	80.02	83.73	84.41	81.49	78.09	84.35	88.7
795.01	89.54	85.48	88.7	82.26	89.86	88.4	87.9	82.27	88.13	89.44	79.83	86.07	87.25	74.56	85.83	82.91	83.24	80.06	90.36	76.78	80.01	83.72	84.4	81.48	78.08	84.34	88.69
795.49	89.54	85.47	88.69	82.26	89.85	88.4	87.9	82.26	88.13	89.43	79.82	86.07	87.24	74.55	85.82	82.9	83.23	80.05	90.35	76.77	80	83.71	84.39	81.47	78.07	84.34	88.69
795.97	89.53	85.46	88.68	82.25	89.84	88.4	87.89	82.25	88.13	89.43	79.81	86.06	87.24	74.54	85.81	82.89	83.23	80.05	90.35	76.75	79.99	83.7	84.39	81.46	78.06	84.33	88.68
796.46	89.53	85.45	88.68	82.24	89.84	88.4	87.88	82.25	88.12	89.42	79.8	86.06	87.24	74.53	85.8	82.87	83.22	80.04	90.34	76.72	79.98	83.69	84.38	81.44	78.04	84.33	88.67
796.94	89.53	85.44	88.67	82.23	89.83	88.39	87.87	82.24	88.12	89.42	79.78	86.05	87.23	74.52	85.79	82.86	83.21	80.03	90.33	76.7	79.96	83.68	84.37	81.43	78.03	84.32	88.67
797.42	89.54	85.42	88.66	82.22	89.82	88.39	87.86	82.23	88.11	89.41	79.77	86.04	87.23	74.5	85.78	82.85	83.2	80.03	90.33	76.68	79.95	83.67	84.36	81.42	78.01	84.31	88.66
797.9	89.54	85.41	88.65	82.2	89.82	88.38	87.85	82.22	88.11	89.41	79.75	86.04	87.22	74.49	85.77	82.84	83.19	80.02	90.32	76.65	79.94	83.66	84.35	81.4	78	84.31	88.65
798.39	89.54	85.4	88.64	82.19	89.81	88.37	87.84	82.2	88.1	89.4	79.74	86.03	87.22	74.47	85.76	82.83	83.18	80.01	90.31	76.63	79.92	83.65	84.34	81.39	77.98	84.3	88.65
798.87	89.53	85.38	88.63	82.17	89.8	88.36	87.83	82.19	88.09	89.39	79.72	86.02	87.21	74.45	85.75	82.82	83.17	80	90.3	76.6	79.9	83.63	84.33	81.37	77.96	84.29	88.64
799.35	89.53	85.37	88.61	82.16	89.79	88.35	87.82	82.18	88.08	89.38	79.7	86	87.2	74.43	85.74	82.8	83.15	79.99	90.29	76.57	79.88	83.62	84.31	81.35	77.93	84.28	88.63
799.83	89.52	85.35	88.6	82.14	89.78	88.34	87.81	82.16	88.07	89.37	79.69	85.99	87.2	74.41	85.72	82.78	83.14	79.97	90.28	76.54	79.86	83.6	84.3	81.34	77.91	84.27	88.62
800.31	89.51	85.34	88.59	82.13	89.77	88.33	87.8	82.15	88.06	89.36	79.67	85.98	87.19	74.39	85.71	82.77	83.12	79.96	90.27	76.51	79.83	83.58	84.28	81.32	77.88	84.25	88.6
800.8	89.5	85.32	88.58	82.11	89.76	88.31	87.79	82.13	88.05	89.36	79.65	85.96	87.18	74.36	85.7	82.75	83.11	79.94	90.25	76.47	79.81	83.56	84.26	81.3	77.85	84.24	88.59
801.28	89.49	85.3	88.56	82.09	89.75	88.3	87.78	82.11	88.03	89.35	79.63	85.95	87.17	74.34	85.68	82.72	83.09	79.92	90.24	76.44	79.79	83.54	84.24	81.28	77.82	84.22	88.58
801.76	89.48	85.29	88.55	82.07	89.74	88.28	87.76	82.09	88.02	89.34	79.61	85.93	87.17	74.31	85.66	82.7	83.07	79.9	90.22	76.41	79.77	83.53	84.22	81.26	77.79	84.2	88.57
802.24	89.46	85.27	88.54	82.05	89.73	88.27	87.75	82.07	88.01	89.33	79.59	85.92	87.16	74.29	85.65	82.68	83.05	79.88	90.21	76.37	79.74	83.51	84.2	81.23	77.76	84.18	88.56
802.72	89.45	85.25	88.53	82.03	89.71	88.26	87.74	82.05	88	89.32	79.56	85.9	87.15	74.26	85.63	82.66	83.03	79.87	90.19	76.34	79.72	83.49	84.18	81.21	77.73	84.16	88.54
803.21	89.43	85.24	88.52	82.01	89.7	88.24	87.73	82.03	87.98	89.3	79.54	85.89	87.14	74.23	85.62	82.64	83.02	79.85	90.17	76.31	79.7	83.48	84.16	81.18	77.7	84.14	88.53
803.69	89.41	85.22	88.51	81.99	89.69	88.23	87.71	82.01	87.97	89.29	79.52	85.88	87.13	74.21	85.6	82.61	83	79.83	90.16	76.27	79.67	83.46	84.14	81.16	77.67	84.12	88.51
804.17	89.4	85.21	88.5	81.97	89.67	88.22	87.7	81.99	87.95	89.28	79.5	85.86	87.12	74.18	85.58	82.59	82.98	79.81	90.14	76.24	79.65	83.45	84.12	81.13	77.64	84.1	88.5
804.65	89.38	85.19	88.48	81.95	89.66	88.21	87.69	81.97	87.94	89.27	79.47	85.85	87.11	74.15	85.57	82.57	82.96	79.8	90.12	76.2	79.62	83.43	84.1	81.1	77.62	84.08	88.49
805.14	89.37	85.17	88.47	81.93	89.64	88.2	87.67	81.95	87.92	89.26	79.45	85.83	87.1	74.12	85.56	82.55	82.94	79.78	90.11	76.17	79.6	83.42	84.08	81.07	77.59	84.06	88.47
805.62	89.36	85.16	88.45	81.91	89.63	88.19	87.65	81.92	87.91	89.24	79.42	85.82	87.09	74.09	85.54	82.53	82.92	79.76	90.09	76.13	79.57	83.4	84.06	81.05	77.56	84.04	88.45
806.1	89.35	85.14	88.44	81.89	89.62	88.17	87.64	81.9	87.89	89.23	79.4	85.8	87.08	74.06	85.53	82.51	82.9	79.74	90.07	76.1	79.54	83.38	84.04	81.02	77.53	84.02	88.44
806.58	89.34	85.12	88.42	81.87	89.6	88.16	87.62	81.88	87.87	89.21	79.37	85.79	87.07	74.03	85.52	82.49	82.88	79.73	90.05	76.06	79.51	83.37	84.02	80.99	77.5	84.01	88.42
807.06	89.33	85.1	88.41	81.84	89.59	88.15	87.6	81.86	87.85	89.2	79.35	85.77	87.06	74	85.5	82.47	82.86	79.71	90.03	76.02	79.49	83.35	84	80.97	77.46	83.99	88.41
807.55	89.32	85.08	88.4	81.82	89.57	88.14	87.58	81.83	87.83	89.19	79.33	85.75	87.05	73.97	85.49	82.45	82.84	79.69	90.02	75.98	79.46	83.34	83.98	80.94	77.43	83.97	88.39
808.03	89.32	85.06	88.38	81.8	89.56	88.12	87.56	81.81	87.81	89.17	79.3	85.74	87.04	73.94	85.48	82.43	82.82	79.67	90	75.95	79.43	83.32	83.96	80.91	77.4	83.95	88.37
808.51	89.31	85.04	88.37	81.77	89.55	88.11	87.55	81.78	87.79	89.16	79.27	85.72	87.03	73.91	85.46	82.42	82.8	79.66	89.98	75.91	79.4	83.3	83.94	80.88	77.36	83.93	88.35
808.99	89.3	85.01	88.36	81.75	89.53	88.09	87.53	81.76	87.77	89.14	79.24	85.7	87.02	73.88	85.45	82.4	82.78	79.64	89.96	75.86	79.37	83.29	83.92	80.85	77.32	83.91	88.34
809.47	89.3	84.99	88.34	81.73	89.52	88.07	87.51	81.73	87.75	89.13	79.21	85.68	87.01	73.84	85.43	82.37	82.76	79.61	89.94	75.82	79.34	83.27	83.89	80.82	77.28	83.89	88.32
809.96	89.29	84.96	88.33	81.7	89.5	88.06	87.49	81.7	87.73	89.11	79.18	85.66	86.99	73.81	85.41	82.35	82.73	79.59	89.92	75.78	79.31	83.25	83.87	80.79	77.24	83.87	88.3
810.44	89.27	84.93	88.31	81.68	89.48	88.04	87.47	81.67	87.7	89.09	79.15	85.64	86.98	73.77	85.4	82.33	82.71	79.57	89.89	75.73	79.28	83.23	83.85	80.76	77.19	83.84	88.28
810.92	89.26	84.91	88.29	81.65	89.47	88.02	87.45	81.64	87.68	89.08	79.11	85.61	86.96	73.73	85.38	82.3	82.68	79.55	89.87	75.69	79.25	83.21	83.82	80.72	77.15	83.82	88.26
811.4	89.24	84.88	88.27	81.62	89.45	87.99	87.43	81.6	87.65	89.06	79.08	85.59	86.94	73.69	85.36	82.28	82.65	79.52	89.84	75.64	79.21	83.18	83.79	80.68	77.1	83.79	88.24
811.88	89.22	84.85	88.25	81.59	89.43	87.97	87.41	81.57	87.62	89.04	79.04	85.56	86.92	73.65	85.33	82.25	82.62	79.49	89.82	75.58	79.17	83.15	83.76	80.64	77.05	83.76	88.22
812.37	89.2	84.82	88.22	81.56	89.4	87.95	87.39	81.53	87.59	89.02	79	85.54	86.9	73.61	85.31	82.22	82.59	79.46	89.79	75.53	79.13	83.13	83.73	80.6	77	83.73	88.19
812.85	89.18	84.78	88.2	81.53	89.38	87.92	87.37	81.49	87.56	89	78.96	85.51	86.87	73.56	85.29	82.19	82.56	79.43	89.76	75.48	79.09	83.09	83.69	80.55	76.95	83.7	88.17
813.33	89.15	84.75	88.17	81.5	89.36	87.9	87.35	81.45	87.52	88.97	78.91	85.47	86.84	73.51	85.26	82.15	82.52	79.39	89.73	75.42	79.05	83.06	83.66	80.5	76.89	83.66	88.14
813.81	89.13	84.72	88.15	81.46	89.33	87.87	87.32	81.4	87.49	88.95	78.87	85.44	86.82	73.45	85.23	82.11	82.48	79.35	89.7	75.36	79	83.02	83.62	80.46	76.84	83.63	88.11
814.3	89.1	84.68	88.12	81.42	89.3	87.84	87.3	81.35	87.45	88.92	78.82	85.4	86.78	73.39	85.2	82.07	82.44	79.31	89.66	75.29	78.95	82.98	83.58	80.4	76.78	83.59	88.07
814.78	89.07	84.65	88.09	81.38	89.27	87.81	87.27	81.3	87.41	88.89	78.76	85.37	86.75	73.32	85.17	82.03	82.4	79.27	89.63	75.23	78.89	82.94	83.53	80.35	76.72	83.54	88.04
815.26	89.04	84.61	88.06	81.33	89.24	87.77	87.24	81.25	87.37	88.85	78.7	85.33	86.72	73.25	85.13	81.98	82.35	79.22	89.59	75.15	78.84	82.89	83.49	80.29	76.66	83.5	88
815.74	89.01	84.56	88.02	81.28	89.21	87.73	87.2	81.19	87.32	88.82	78.64	85.28	86.68	73.18	85.09	81.93	82.31	79.17	89.55	75.08	78.77	82.84	83.44	80.24	76.6	83.45	87.96
816.22	88.98	84.52	87.98	81.23	89.17	87.69	87.17	81.13	87.28	88.78	78.57	85.24	86.64	73.1	85.05	81.87	82.26	79.12	89.5	75	78.71	82.78	83.38	80.17	76.53	83.4	87.91
816.71	88.95	84.47	87.94	81.18	89.13	87.65	87.13	81.06	87.23	88.74	78.5	85.19	86.6	73.02	85.01	81.82	82.2	79.06	89.45	74.91	78.64	82.73	83.32	80.11	76.45	83.35	87.87
817.19	88.91	84.42	87.89	81.12	89.1	87.6	87.1	80.99	87.18	88.7	78.43	85.14	86.56	72.93	84.96	81.76	82.15	79	89.4	74.82	78.57	82.67	83.26	80.04	76.37	83.3	87.82
817.67	88.88	84.37	87.85	81.06	89.06	87.56	87.06	80.92	87.13	88.66	78.35	85.09	86.51	72.84	84.92	81.7	82.09	78.94	89.35	74.72	78.5	82.6	83.2	79.97	76.29	83.25	87.77
818.15	88.85	84.31	87.8	80.99	89.01	87.51	87.01	80.84	87.07	88.61	78.27	85.03	86.46	72.75	84.87	81.64	82.03	78.87	89.3	74.63	78.42	82.54	83.13	79.9	76.21	83.19	87.72
818.63	88.82	84.26	87.74	80.92	88.97	87.45	86.97	80.77	87.01	88.57	78.18	84.98	86.42	72.66	84.82	81.58	81.97	78.8	89.24	74.53	78.34	82.47	83.06	79.82	76.12	83.13	87.67
819.12	88.79	84.2	87.69	80.85	88.92	87.4	86.92	80.69	86.94	88.52	78.1	84.92	86.37	72.57	84.76	81.52	81.91	78.73	89.18	74.43	78.26	82.4	82.99	79.74	76.03	83.07	87.61
819.6	88.75	84.14	87.63	80.77	88.87	87.35	86.88	80.61	86.88	88.47	78.01	84.86	86.32	72.47	84.71	81.45	81.84	78.66	89.12	74.33	78.17	82.33	82.92	79.67	75.94	83	87.55
820.08	88.72	84.08	87.58	80.69	88.82	87.29	86.83	80.52	86.81	88.42	77.92	84.79	86.26	72.37	84.65	81.39	81.77	78.58	89.06	74.23	78.08	82.25	82.85	79.58	75.85	82.94	87.5
820.56	88.68	84.02	87.52	80.61	88.77	87.23	86.78	80.44	86.75	88.37	77.83	84.73	86.21	72.26	84.6	81.32	81.7	78.5	89	74.13	77.99	82.18	82.77	79.5	75.75	82.87	87.44
821.04	88.64	83.95	87.46	80.53	88.72	87.17	86.73	80.35	86.68	88.32	77.73	84.66	86.15	72.15	84.54	81.26	81.63	78.42	88.94	74.02	77.9	82.1	82.7	79.41	75.66	82.8	87.38
821.53	88.6	83.89	87.4	80.45	88.67	87.12	86.67	80.26	86.61	88.27	77.64	84.59	86.09	72.04	84.48	81.19	81.55	78.34	88.88	73.91	77.8	82.03	82.62	79.33	75.56	82.73	87.32
822.01	88.55	83.82	87.34	80.36	88.62	87.06	86.62	80.18	86.54	88.22	77.54	84.53	86.04	71.94	84.42	81.12	81.48	78.26	88.81	73.81	77.71	81.95	82.54	79.24	75.47	82.66	87.26
822.49	88.5	83.76	87.29	80.28	88.56	87	86.57	80.09	86.47	88.16	77.44	84.46	85.98	71.83	84.36	81.05	81.4	78.18	88.75	73.7	77.61	81.87	82.46	79.15	75.37	82.59	87.19
822.97	88.46	83.69	87.23	80.19	88.51	86.94	86.52	80.01	86.4	88.11	77.35	84.39	85.92	71.72	84.3	80.97	81.32	78.09	88.68	73.59	77.51	81.79	82.39	79.06	75.27	82.51	87.13
823.46	88.41	83.63	87.17	80.1	88.45	86.88	86.47	79.92	86.32	88.06	77.25	84.32	85.86	71.61	84.24	80.9	81.24	78.01	88.62	73.47	77.42	81.71	82.31	78.97	75.18	82.44	87.06
823.94	88.35	83.56	87.11	80.02	88.4	86.82	86.42	79.83	86.25	88.01	77.15	84.25	85.8	71.49	84.17	80.83	81.17	77.92	88.55	73.36	77.32	81.63	82.23	78.88	75.08	82.37	87
824.42	88.3	83.5	87.05	79.94	88.34	86.76	86.38	79.74	86.18	87.95	77.05	84.18	85.74	71.38	84.11	80.75	81.09	77.84	88.49	73.24	77.21	81.55	82.15	78.79	74.99	82.3	86.93
824.9	88.25	83.43	86.99	79.85	88.28	86.7	86.33	79.65	86.11	87.9	76.95	84.11	85.68	71.27	84.05	80.67	81.01	77.75	88.42	73.13	77.11	81.47	82.07	78.69	74.89	82.22	86.86
825.38	88.2	83.37	86.93	79.77	88.23	86.63	86.28	79.56	86.03	87.85	76.86	84.04	85.62	71.16	83.99	80.59	80.93	77.67	88.36	73.01	77.01	81.38	81.99	78.6	74.8	82.15	86.8
825.87	88.15	83.3	86.87	79.68	88.17	86.57	86.23	79.47	85.96	87.8	76.76	83.97	85.56	71.05	83.93	80.52	80.85	77.59	88.29	72.9	76.91	81.3	81.91	78.51	74.71	82.08	86.73
826.35	88.11	83.23	86.81	79.6	88.12	86.51	86.19	79.38	85.89	87.75	76.66	83.9	85.5	70.93	83.86	80.44	80.78	77.5	88.23	72.78	76.82	81.22	81.83	78.42	74.61	82.01	86.66
826.83	88.06	83.17	86.75	79.52	88.06	86.45	86.14	79.29	85.81	87.69	76.57	83.84	85.44	70.82	83.8	80.36	80.7	77.42	88.16	72.67	76.72	81.14	81.75	78.33	74.52	81.93	86.6
827.31	88.02	83.1	86.69	79.43	88	86.39	86.09	79.2	85.74	87.64	76.47	83.77	85.38	70.71	83.74	80.28	80.63	77.34	88.1	72.56	76.62	81.05	81.67	78.24	74.43	81.86	86.53
827.79	87.97	83.04	86.63	79.35	87.95	86.32	86.04	79.11	85.68	87.59	76.38	83.7	85.32	70.6	83.68	80.21	80.56	77.26	88.04	72.45	76.52	80.97	81.59	78.15	74.34	81.79	86.47
828.28	87.93	82.97	86.57	79.26	87.9	86.26	86	79.02	85.61	87.54	76.28	83.63	85.26	70.49	83.62	80.14	80.49	77.17	87.98	72.34	76.43	80.89	81.51	78.07	74.25	81.72	86.4
828.76	87.89	82.9	86.5	79.18	87.84	86.2	85.95	78.93	85.54	87.49	76.19	83.57	85.2	70.39	83.56	80.06	80.42	77.09	87.91	72.23	76.33	80.81	81.44	77.98	74.17	81.65	86.34
829.24	87.85	82.84	86.44	79.1	87.79	86.14	85.9	78.84	85.48	87.44	76.1	83.5	85.15	70.28	83.5	79.99	80.35	77.01	87.85	72.13	76.24	80.72	81.36	77.9	74.08	81.59	86.28
829.72	87.81	82.78	86.38	79.01	87.74	86.08	85.85	78.75	85.41	87.39	76.01	83.44	85.09	70.18	83.45	79.92	80.28	76.94	87.79	72.03	76.15	80.64	81.28	77.81	74	81.52	86.22
830.21	87.77	82.71	86.33	78.93	87.69	86.02	85.81	78.67	85.34	87.35	75.92	83.37	85.03	70.08	83.39	79.86	80.21	76.86	87.73	71.93	76.05	80.56	81.21	77.73	73.92	81.46	86.16
830.69	87.73	82.65	86.27	78.85	87.63	85.96	85.76	78.58	85.28	87.3	75.83	83.31	84.98	69.98	83.33	79.79	80.14	76.78	87.67	71.83	75.96	80.48	81.13	77.65	73.83	81.39	86.1
831.17	87.69	82.59	86.21	78.77	87.58	85.9	85.71	78.49	85.21	87.25	75.74	83.24	84.92	69.88	83.28	79.72	80.07	76.71	87.61	71.73	75.87	80.4	81.06	77.57	73.75	81.33	86.04
831.65	87.65	82.53	86.15	78.69	87.53	85.84	85.66	78.41	85.14	87.2	75.65	83.18	84.87	69.79	83.22	79.66	80	76.63	87.55	71.63	75.77	80.32	80.99	77.49	73.67	81.27	85.98
832.13	87.61	82.47	86.1	78.6	87.48	85.78	85.62	78.33	85.08	87.15	75.56	83.12	84.81	69.69	83.17	79.59	79.93	76.56	87.49	71.53	75.68	80.24	80.92	77.4	73.59	81.21	85.92
832.62	87.57	82.41	86.04	78.52	87.43	85.72	85.57	78.24	85.01	87.11	75.47	83.05	84.76	69.59	83.11	79.52	79.86	76.49	87.43	71.43	75.58	80.16	80.84	77.32	73.51	81.14	85.86
833.1	87.53	82.35	85.99	78.44	87.38	85.67	85.52	78.16	84.94	87.06	75.39	82.99	84.7	69.49	83.06	79.45	79.8	76.41	87.37	71.34	75.49	80.08	80.77	77.24	73.43	81.08	85.8
833.58	87.48	82.29	85.93	78.36	87.33	85.6	85.47	78.08	84.87	87.01	75.3	82.92	84.65	69.4	83	79.38	79.73	76.34	87.31	71.24	75.39	80	80.7	77.16	73.35	81.02	85.74
834.06	87.43	82.23	85.87	78.28	87.27	85.54	85.42	77.99	84.81	86.96	75.21	82.86	84.6	69.3	82.95	79.32	79.66	76.26	87.26	71.14	75.3	79.92	80.62	77.08	73.27	80.96	85.68
834.54	87.39	82.17	85.82	78.19	87.22	85.48	85.38	77.91	84.74	86.91	75.12	82.79	84.54	69.2	82.89	79.25	79.59	76.19	87.2	71.04	75.2	79.84	80.55	77	73.19	80.89	85.62
835.03	87.34	82.11	85.76	78.11	87.17	85.42	85.33	77.83	84.68	86.87	75.03	82.73	84.49	69.1	82.84	79.18	79.53	76.12	87.14	70.95	75.11	79.76	80.47	76.92	73.11	80.83	85.56
835.51	87.29	82.05	85.7	78.03	87.12	85.36	85.28	77.75	84.61	86.82	74.94	82.66	84.44	69.01	82.78	79.11	79.46	76.04	87.08	70.85	75.01	79.69	80.4	76.84	73.04	80.77	85.5
835.99	87.24	81.99	85.64	77.95	87.07	85.3	85.24	77.66	84.55	86.77	74.84	82.6	84.38	68.91	82.72	79.04	79.39	75.97	87.02	70.75	74.92	79.61	80.32	76.76	72.96	80.71	85.44
836.47	87.2	81.93	85.59	77.86	87.01	85.24	85.19	77.58	84.48	86.72	74.75	82.53	84.33	68.81	82.67	78.97	79.33	75.9	86.96	70.65	74.82	79.54	80.25	76.68	72.88	80.65	85.38
836.95	87.15	81.87	85.53	77.78	86.96	85.17	85.15	77.5	84.42	86.67	74.66	82.47	84.27	68.71	82.61	78.89	79.26	75.82	86.9	70.56	74.73	79.46	80.17	76.6	72.81	80.59	85.32
837.44	87.11	81.81	85.48	77.7	86.91	85.12	85.11	77.41	84.35	86.62	74.57	82.4	84.22	68.61	82.55	78.82	79.19	75.75	86.84	70.46	74.63	79.39	80.1	76.52	72.73	80.53	85.27
837.92	87.07	81.75	85.42	77.61	86.86	85.06	85.06	77.33	84.29	86.57	74.48	82.34	84.16	68.51	82.49	78.75	79.13	75.68	86.79	70.36	74.54	79.31	80.02	76.44	72.66	80.47	85.21
838.4	87.03	81.69	85.37	77.53	86.8	85	85.02	77.25	84.22	86.52	74.39	82.28	84.11	68.42	82.43	78.68	79.06	75.61	86.73	70.26	74.45	79.23	79.95	76.36	72.58	80.41	85.16
838.88	86.99	81.63	85.31	77.45	86.75	84.94	84.98	77.16	84.16	86.48	74.3	82.21	84.05	68.32	82.37	78.61	78.99	75.53	86.67	70.17	74.36	79.16	79.87	76.28	72.51	80.35	85.1
839.37	86.95	81.57	85.26	77.36	86.7	84.88	84.94	77.08	84.09	86.43	74.2	82.15	83.99	68.22	82.31	78.54	78.93	75.46	86.61	70.07	74.27	79.08	79.8	76.21	72.43	80.29	85.05
839.85	86.91	81.51	85.2	77.28	86.64	84.82	84.9	76.99	84.03	86.38	74.11	82.08	83.94	68.12	82.25	78.47	78.86	75.39	86.56	69.97	74.18	79.01	79.72	76.13	72.36	80.23	84.99
840.33	86.87	81.45	85.15	77.19	86.59	84.76	84.86	76.91	83.96	86.33	74.02	82.02	83.88	68.01	82.19	78.4	78.79	75.32	86.5	69.88	74.09	78.93	79.65	76.05	72.28	80.18	84.93
840.81	86.84	81.39	85.09	77.11	86.54	84.71	84.82	76.83	83.9	86.28	73.92	81.95	83.82	67.91	82.13	78.33	78.72	75.24	86.45	69.78	74	78.85	79.57	75.97	72.21	80.12	84.88
841.29	86.8	81.33	85.04	77.02	86.48	84.65	84.78	76.74	83.84	86.23	73.83	81.88	83.77	67.81	82.07	78.26	78.65	75.17	86.39	69.69	73.91	78.78	79.5	75.89	72.13	80.06	84.82
841.78	86.76	81.27	84.98	76.93	86.43	84.59	84.73	76.65	83.77	86.18	73.74	81.82	83.71	67.71	82.02	78.19	78.58	75.1	86.33	69.59	73.82	78.7	79.43	75.81	72.06	80	84.77
842.26	86.71	81.21	84.92	76.84	86.38	84.53	84.69	76.57	83.71	86.13	73.65	81.75	83.65	67.61	81.96	78.13	78.52	75.03	86.28	69.5	73.73	78.62	79.36	75.74	71.98	79.94	84.71
842.74	86.67	81.15	84.86	76.75	86.32	84.46	84.65	76.48	83.65	86.08	73.56	81.68	83.6	67.52	81.9	78.06	78.45	74.96	86.22	69.41	73.64	78.55	79.28	75.66	71.91	79.88	84.65
843.22	86.62	81.09	84.81	76.67	86.27	84.4	84.6	76.4	83.58	86.04	73.47	81.62	83.54	67.42	81.85	77.99	78.38	74.88	86.17	69.31	73.55	78.47	79.21	75.58	71.83	79.82	84.59
843.7	86.58	81.03	84.75	76.58	86.22	84.34	84.56	76.31	83.52	85.99	73.38	81.55	83.49	67.32	81.79	77.92	78.31	74.81	86.11	69.22	73.46	78.4	79.13	75.5	71.76	79.76	84.53
844.19	86.53	80.97	84.69	76.49	86.16	84.28	84.51	76.22	83.46	85.94	73.29	81.48	83.43	67.22	81.74	77.85	78.23	74.73	86.05	69.13	73.37	78.32	79.06	75.42	71.68	79.7	84.48
844.67	86.48	80.91	84.64	76.4	86.11	84.22	84.47	76.14	83.39	85.89	73.2	81.41	83.38	67.13	81.68	77.77	78.16	74.66	86	69.03	73.28	78.24	78.98	75.34	71.61	79.63	84.42
845.15	86.43	80.85	84.58	76.32	86.06	84.16	84.42	76.05	83.33	85.84	73.12	81.35	83.33	67.04	81.63	77.7	78.09	74.59	85.94	68.94	73.19	78.17	78.91	75.26	71.53	79.57	84.36
845.63	86.38	80.8	84.53	76.24	86.01	84.1	84.37	75.97	83.27	85.8	73.03	81.28	83.27	66.95	81.58	77.63	78.03	74.52	85.89	68.86	73.1	78.09	78.84	75.18	71.46	79.51	84.31
846.11	86.33	80.74	84.47	76.16	85.96	84.04	84.33	75.88	83.21	85.75	72.95	81.22	83.22	66.87	81.53	77.56	77.96	74.45	85.83	68.77	73.02	78.02	78.76	75.1	71.38	79.45	84.25
846.6	86.28	80.68	84.41	76.08	85.91	83.99	84.28	75.8	83.15	85.71	72.87	81.16	83.17	66.78	81.48	77.49	77.89	74.39	85.78	68.68	72.93	77.95	78.69	75.03	71.31	79.39	84.2
847.08	86.23	80.63	84.36	76	85.86	83.94	84.24	75.72	83.1	85.66	72.79	81.09	83.12	66.7	81.44	77.43	77.83	74.33	85.72	68.6	72.85	77.88	78.62	74.95	71.23	79.33	84.15
847.56	86.19	80.57	84.3	75.93	85.82	83.89	84.2	75.65	83.04	85.62	72.71	81.03	83.07	66.62	81.39	77.36	77.76	74.27	85.67	68.51	72.76	77.82	78.56	74.87	71.15	79.27	84.11
848.04	86.15	80.52	84.25	75.85	85.77	83.84	84.15	75.57	82.99	85.58	72.63	80.97	83.02	66.55	81.34	77.3	77.7	74.21	85.62	68.42	72.67	77.75	78.49	74.79	71.08	79.21	84.06
848.53	86.11	80.46	84.19	75.78	85.73	83.79	84.11	75.49	82.94	85.53	72.56	80.91	82.97	66.47	81.29	77.23	77.64	74.15	85.57	68.34	72.59	77.68	78.42	74.71	71	79.14	84.01
849.01	86.07	80.41	84.14	75.71	85.68	83.74	84.07	75.42	82.89	85.49	72.48	80.85	82.92	66.4	81.24	77.17	77.58	74.1	85.52	68.25	72.5	77.62	78.36	74.64	70.93	79.08	83.97
849.49	86.04	80.35	84.08	75.63	85.64	83.69	84.03	75.34	82.83	85.44	72.41	80.79	82.86	66.32	81.18	77.11	77.51	74.04	85.47	68.16	72.41	77.55	78.29	74.56	70.85	79.01	83.92
849.97	86	80.29	84.03	75.56	85.59	83.64	83.99	75.27	82.78	85.39	72.33	80.72	82.8	66.24	81.12	77.05	77.45	73.98	85.42	68.07	72.32	77.48	78.22	74.48	70.77	78.95	83.88
850.45	85.97	80.23	83.96	75.48	85.54	83.58	83.95	75.19	82.72	85.33	72.24	80.65	82.74	66.15	81.06	76.98	77.38	73.92	85.36	67.98	72.22	77.41	78.15	74.39	70.69	78.87	83.83
850.94	85.93	80.17	83.9	75.4	85.48	83.52	83.91	75.1	82.66	85.28	72.15	80.58	82.67	66.05	80.98	76.91	77.31	73.85	85.3	67.88	72.11	77.33	78.07	74.31	70.6	78.8	83.78
851.42	85.89	80.1	83.83	75.32	85.43	83.46	83.86	75.01	82.59	85.22	72.05	80.5	82.59	65.94	80.9	76.84	77.24	73.77	85.24	67.77	72	77.25	77.98	74.22	70.52	78.72	83.72
851.9	85.84	80.03	83.75	75.23	85.36	83.39	83.81	74.91	82.51	85.15	71.95	80.42	82.51	65.82	80.81	76.76	77.15	73.68	85.18	67.67	71.89	77.16	77.89	74.12	70.42	78.64	83.65
852.38	85.79	79.95	83.68	75.13	85.3	83.31	83.75	74.81	82.43	85.08	71.83	80.33	82.42	65.68	80.72	76.67	77.07	73.58	85.11	67.55	71.76	77.07	77.79	74.02	70.33	78.55	83.58
852.86	85.73	79.87	83.59	75.03	85.23	83.23	83.7	74.7	82.34	85	71.7	80.23	82.32	65.54	80.62	76.57	76.97	73.46	85.03	67.43	71.64	76.97	77.68	73.92	70.23	78.45	83.5
853.35	85.67	79.79	83.5	74.91	85.15	83.14	83.63	74.58	82.24	84.93	71.56	80.13	82.22	65.37	80.51	76.47	76.87	73.33	84.95	67.31	71.5	76.86	77.57	73.81	70.13	78.35	83.42
853.83	85.6	79.69	83.41	74.79	85.07	83.04	83.56	74.45	82.13	84.84	71.41	80.02	82.11	65.2	80.39	76.36	76.77	73.19	84.86	67.18	71.36	76.75	77.44	73.69	70.02	78.25	83.32
854.31	85.52	79.6	83.32	74.66	84.98	82.94	83.49	74.31	82.02	84.75	71.25	79.91	82	65.01	80.27	76.25	76.65	73.03	84.77	67.04	71.21	76.63	77.31	73.57	69.91	78.14	83.22
854.79	85.44	79.49	83.22	74.52	84.88	82.83	83.41	74.17	81.9	84.66	71.07	79.79	81.88	64.8	80.14	76.12	76.53	72.86	84.68	66.9	71.05	76.5	77.16	73.44	69.8	78.03	83.11
855.28	85.35	79.39	83.11	74.37	84.78	82.72	83.33	74.01	81.77	84.57	70.89	79.66	81.75	64.58	80.01	75.99	76.41	72.68	84.58	66.75	70.88	76.37	77.01	73.31	69.68	77.91	83
855.76	85.25	79.27	83	74.22	84.68	82.6	83.24	73.85	81.63	84.47	70.69	79.53	81.62	64.34	79.87	75.85	76.27	72.49	84.47	66.59	70.71	76.24	76.85	73.17	69.56	77.79	82.88
856.24	85.15	79.16	82.89	74.05	84.57	82.47	83.15	73.69	81.5	84.36	70.48	79.4	81.49	64.1	79.73	75.7	76.14	72.28	84.37	66.43	70.53	76.1	76.68	73.03	69.43	77.66	82.75
856.72	85.05	79.04	82.78	73.88	84.46	82.34	83.05	73.52	81.35	84.26	70.27	79.26	81.35	63.84	79.59	75.55	76	72.07	84.26	66.26	70.35	75.96	76.51	72.89	69.31	77.54	82.62
857.2	84.94	78.91	82.66	73.71	84.34	82.21	82.95	73.34	81.21	84.15	70.05	79.12	81.22	63.58	79.45	75.4	75.85	71.85	84.14	66.1	70.17	75.81	76.34	72.74	69.19	77.41	82.49
857.69	84.83	78.79	82.54	73.53	84.22	82.08	82.84	73.16	81.06	84.05	69.82	78.98	81.08	63.32	79.3	75.24	75.71	71.62	84.02	65.92	69.98	75.67	76.16	72.6	69.06	77.28	82.35
858.17	84.73	78.66	82.42	73.35	84.1	81.94	82.74	72.98	80.91	83.94	69.59	78.84	80.94	63.04	79.16	75.08	75.56	71.38	83.91	65.75	69.79	75.52	75.99	72.45	68.94	77.14	82.21
858.65	84.62	78.53	82.29	73.16	83.98	81.8	82.63	72.8	80.75	83.82	69.36	78.7	80.8	62.77	79.01	74.92	75.4	71.14	83.79	65.58	69.6	75.37	75.81	72.3	68.81	77.01	82.06
859.13	84.51	78.39	82.17	72.97	83.85	81.66	82.52	72.61	80.6	83.71	69.12	78.55	80.66	62.49	78.86	74.76	75.25	70.9	83.66	65.4	69.4	75.21	75.63	72.15	68.68	76.87	81.92
859.61	84.4	78.26	82.04	72.78	83.73	81.52	82.41	72.43	80.44	83.6	68.88	78.4	80.51	62.2	78.71	74.6	75.09	70.66	83.54	65.22	69.21	75.06	75.44	72.01	68.55	76.73	81.77
860.1	84.3	78.13	81.91	72.59	83.6	81.38	82.3	72.24	80.29	83.49	68.64	78.26	80.37	61.92	78.57	74.43	74.94	70.41	83.42	65.04	69.02	74.91	75.26	71.86	68.42	76.6	81.63
860.58	84.19	78	81.79	72.4	83.48	81.24	82.19	72.06	80.13	83.38	68.41	78.12	80.23	61.65	78.42	74.27	74.78	70.17	83.3	64.87	68.82	74.75	75.09	71.72	68.29	76.46	81.49
861.06	84.09	77.87	81.66	72.21	83.36	81.1	82.08	71.87	79.98	83.27	68.17	77.97	80.09	61.38	78.27	74.11	74.63	69.93	83.18	64.69	68.63	74.6	74.91	71.57	68.16	76.33	81.34
861.54	83.99	77.74	81.54	72.02	83.24	80.96	81.97	71.69	79.83	83.16	67.94	77.83	79.96	61.11	78.13	73.95	74.48	69.69	83.06	64.52	68.44	74.45	74.73	71.43	68.03	76.19	81.2
862.02	83.89	77.61	81.41	71.83	83.12	80.82	81.86	71.51	79.68	83.05	67.71	77.69	79.82	60.85	77.98	73.79	74.33	69.46	82.94	64.35	68.25	74.3	74.56	71.29	67.9	76.06	81.06
862.51	83.79	77.49	81.29	71.65	83	80.68	81.75	71.34	79.54	82.94	67.49	77.55	79.68	60.59	77.84	73.63	74.18	69.22	82.82	64.18	68.07	74.15	74.39	71.15	67.77	75.93	80.92
862.99	83.69	77.36	81.16	71.46	82.89	80.55	81.65	71.16	79.39	82.84	67.27	77.41	79.55	60.34	77.7	73.48	74.03	69	82.7	64	67.88	74	74.22	71	67.64	75.8	80.78
863.47	83.59	77.24	81.04	71.28	82.78	80.42	81.55	70.99	79.25	82.73	67.05	77.28	79.42	60.1	77.57	73.33	73.88	68.77	82.58	63.83	67.7	73.85	74.06	70.86	67.51	75.67	80.65
863.95	83.49	77.12	80.92	71.1	82.66	80.29	81.45	70.82	79.11	82.63	66.84	77.14	79.29	59.86	77.43	73.19	73.74	68.55	82.46	63.67	67.52	73.7	73.89	70.72	67.37	75.54	80.51
864.44	83.39	77.01	80.8	70.93	82.55	80.17	81.35	70.66	78.97	82.53	66.64	77.01	79.16	59.63	77.3	73.04	73.6	68.34	82.35	63.5	67.35	73.56	73.74	70.59	67.25	75.41	80.38
864.92	83.29	76.89	80.68	70.75	82.44	80.05	81.26	70.5	78.84	82.43	66.44	76.88	79.03	59.4	77.17	72.91	73.46	68.13	82.23	63.34	67.18	73.42	73.58	70.45	67.12	75.29	80.25
865.4	83.19	76.78	80.57	70.58	82.34	79.93	81.17	70.34	78.7	82.34	66.25	76.75	78.91	59.19	77.04	72.77	73.32	67.93	82.12	63.18	67.01	73.28	73.43	70.32	66.99	75.16	80.12
865.88	83.1	76.67	80.45	70.41	82.23	79.81	81.07	70.18	78.57	82.24	66.06	76.63	78.79	58.97	76.92	72.64	73.19	67.73	82.01	63.03	66.84	73.14	73.28	70.18	66.86	75.04	80
866.36	83	76.56	80.34	70.25	82.13	79.69	80.99	70.03	78.45	82.15	65.88	76.5	78.67	58.76	76.79	72.5	73.05	67.54	81.9	62.87	66.68	73	73.13	70.04	66.74	74.92	79.88
866.85	82.91	76.45	80.24	70.08	82.03	79.58	80.9	69.88	78.32	82.06	65.7	76.38	78.55	58.56	76.67	72.37	72.92	67.35	81.79	62.72	66.52	72.86	72.99	69.91	66.61	74.8	79.76
867.33	82.81	76.35	80.13	69.92	81.93	79.47	80.81	69.73	78.2	81.97	65.53	76.25	78.44	58.36	76.56	72.24	72.79	67.17	81.68	62.56	66.36	72.72	72.85	69.78	66.48	74.68	79.64
867.81	82.72	76.24	80.03	69.76	81.84	79.36	80.73	69.58	78.08	81.88	65.37	76.13	78.33	58.17	76.44	72.12	72.66	66.99	81.58	62.41	66.2	72.59	72.71	69.64	66.36	74.57	79.53
868.29	82.64	76.14	79.92	69.61	81.74	79.25	80.65	69.44	77.97	81.79	65.21	76.02	78.22	57.99	76.33	71.99	72.54	66.82	81.48	62.26	66.04	72.46	72.58	69.51	66.23	74.45	79.42
868.77	82.56	76.04	79.82	69.46	81.65	79.15	80.56	69.3	77.86	81.7	65.05	75.9	78.11	57.81	76.23	71.87	72.42	66.66	81.37	62.12	65.89	72.33	72.45	69.38	66.11	74.34	79.31
869.26	82.48	75.94	79.73	69.32	81.56	79.05	80.49	69.16	77.75	81.62	64.9	75.79	78.01	57.64	76.12	71.75	72.3	66.5	81.27	61.97	65.74	72.2	72.32	69.25	65.98	74.23	79.21
869.74	82.4	75.84	79.63	69.18	81.47	78.95	80.41	69.02	77.64	81.54	64.76	75.68	77.91	57.47	76.02	71.63	72.18	66.35	81.17	61.83	65.59	72.07	72.2	69.12	65.86	74.12	79.11
870.22	82.33	75.74	79.53	69.04	81.39	78.85	80.33	68.89	77.54	81.46	64.62	75.57	77.81	57.31	75.92	71.52	72.07	66.2	81.08	61.68	65.44	71.94	72.08	68.99	65.74	74.01	79.01
870.7	82.26	75.64	79.43	68.9	81.3	78.75	80.25	68.76	77.44	81.38	64.48	75.47	77.71	57.16	75.82	71.41	71.96	66.05	80.98	61.54	65.3	71.81	71.96	68.87	65.61	73.9	78.91
871.19	82.19	75.55	79.34	68.77	81.22	78.66	80.18	68.63	77.34	81.3	64.35	75.36	77.61	57.01	75.73	71.29	71.85	65.92	80.89	61.4	65.16	71.69	71.84	68.74	65.49	73.79	78.81
871.67	82.13	75.46	79.24	68.64	81.14	78.57	80.1	68.5	77.24	81.22	64.23	75.26	77.51	56.87	75.64	71.19	71.74	65.78	80.79	61.27	65.01	71.56	71.73	68.62	65.37	73.68	78.72
872.15	82.07	75.37	79.15	68.51	81.06	78.48	80.03	68.38	77.14	81.15	64.11	75.16	77.42	56.73	75.55	71.08	71.63	65.65	80.7	61.14	64.88	71.44	71.61	68.5	65.24	73.58	78.63
872.63	82.01	75.28	79.06	68.38	80.98	78.39	79.95	68.25	77.05	81.07	64	75.06	77.33	56.6	75.46	70.98	71.53	65.53	80.61	61.01	64.74	71.32	71.51	68.38	65.12	73.48	78.54
873.11	81.95	75.2	78.97	68.26	80.91	78.31	79.88	68.14	76.96	81	63.89	74.97	77.24	56.48	75.38	70.88	71.43	65.41	80.52	60.88	64.61	71.2	71.4	68.26	65	73.38	78.45
873.6	81.89	75.11	78.88	68.14	80.84	78.22	79.81	68.02	76.88	80.93	63.78	74.87	77.15	56.36	75.29	70.79	71.33	65.3	80.43	60.75	64.48	71.09	71.3	68.14	64.88	73.28	78.36
874.08	81.83	75.03	78.79	68.02	80.77	78.14	79.74	67.9	76.79	80.85	63.68	74.78	77.07	56.25	75.22	70.7	71.24	65.19	80.34	60.63	64.35	70.97	71.2	68.03	64.76	73.18	78.28
874.56	81.77	74.96	78.71	67.9	80.7	78.06	79.68	67.79	76.71	80.79	63.58	74.68	76.98	56.14	75.14	70.61	71.14	65.09	80.26	60.51	64.22	70.86	71.11	67.91	64.63	73.09	78.2
875.04	81.71	74.88	78.62	67.79	80.63	77.99	79.61	67.68	76.63	80.72	63.49	74.59	76.9	56.04	75.06	70.52	71.05	64.99	80.17	60.39	64.1	70.75	71.01	67.8	64.51	72.99	78.12
875.52	81.65	74.81	78.54	67.68	80.57	77.91	79.55	67.57	76.56	80.65	63.4	74.5	76.82	55.94	74.99	70.44	70.96	64.89	80.09	60.27	63.98	70.64	70.93	67.69	64.39	72.9	78.05
876.01	81.6	74.73	78.46	67.58	80.51	77.84	79.49	67.47	76.48	80.58	63.32	74.42	76.75	55.85	74.92	70.36	70.87	64.81	80.01	60.15	63.86	70.53	70.84	67.58	64.27	72.81	77.98
876.49	81.54	74.67	78.38	67.48	80.45	77.77	79.43	67.37	76.41	80.52	63.24	74.33	76.67	55.77	74.86	70.29	70.78	64.73	79.93	60.04	63.74	70.42	70.76	67.47	64.15	72.73	77.91
876.97	81.48	74.6	78.3	67.38	80.39	77.7	79.37	67.27	76.34	80.46	63.16	74.25	76.6	55.69	74.79	70.21	70.7	64.65	79.85	59.93	63.63	70.32	70.68	67.36	64.03	72.64	77.85
877.45	81.43	74.53	78.22	67.28	80.33	77.63	79.32	67.18	76.28	80.4	63.09	74.17	76.53	55.62	74.73	70.14	70.61	64.58	79.77	59.82	63.52	70.22	70.61	67.26	63.91	72.56	77.78
877.93	81.37	74.46	78.15	67.18	80.28	77.56	79.27	67.08	76.21	80.34	63.02	74.09	76.46	55.55	74.67	70.07	70.53	64.51	79.7	59.71	63.41	70.12	70.53	67.15	63.79	72.47	77.72
878.42	81.32	74.39	78.07	67.09	80.22	77.5	79.22	66.99	76.14	80.28	62.95	74.01	76.4	55.48	74.61	70	70.45	64.45	79.62	59.6	63.3	70.02	70.46	67.04	63.67	72.39	77.67
878.9	81.27	74.32	78	67	80.17	77.44	79.17	66.89	76.08	80.22	62.89	73.94	76.33	55.42	74.56	69.93	70.37	64.39	79.55	59.49	63.2	69.92	70.39	66.94	63.55	72.31	77.61
879.38	81.22	74.25	77.93	66.91	80.12	77.38	79.12	66.8	76.02	80.16	62.83	73.86	76.27	55.36	74.5	69.87	70.29	64.33	79.48	59.38	63.09	69.82	70.32	66.83	63.43	72.23	77.56
879.86	81.18	74.19	77.86	66.82	80.07	77.32	79.08	66.72	75.96	80.11	62.78	73.79	76.21	55.31	74.45	69.8	70.21	64.28	79.41	59.28	63	69.73	70.26	66.73	63.31	72.16	77.51
880.35	81.13	74.12	77.79	66.73	80.02	77.26	79.04	66.63	75.9	80.05	62.73	73.72	76.15	55.26	74.4	69.74	70.14	64.24	79.34	59.18	62.9	69.64	70.2	66.63	63.2	72.08	77.46
880.83	81.09	74.06	77.72	66.65	79.98	77.21	79	66.55	75.85	80	62.68	73.65	76.09	55.22	74.36	69.68	70.07	64.2	79.27	59.08	62.81	69.54	70.14	66.53	63.08	72.01	77.42
881.31	81.06	74	77.65	66.58	79.93	77.16	78.96	66.46	75.8	79.95	62.64	73.58	76.03	55.18	74.31	69.62	70	64.16	79.2	58.98	62.72	69.45	70.08	66.44	62.97	71.93	77.37
881.79	81.02	73.94	77.59	66.5	79.89	77.11	78.92	66.38	75.75	79.9	62.6	73.51	75.98	55.15	74.27	69.57	69.93	64.12	79.14	58.89	62.63	69.36	70.02	66.34	62.85	71.86	77.33
882.27	80.99	73.88	77.52	66.43	79.85	77.06	78.88	66.3	75.7	79.84	62.56	73.44	75.93	55.12	74.23	69.52	69.87	64.09	79.08	58.79	62.54	69.27	69.97	66.24	62.74	71.79	77.29
882.76	80.96	73.82	77.46	66.36	79.81	77.01	78.84	66.23	75.66	79.79	62.53	73.38	75.87	55.1	74.19	69.47	69.8	64.07	79.01	58.7	62.46	69.19	69.92	66.15	62.63	71.73	77.25
883.24	80.93	73.77	77.4	66.29	79.77	76.96	78.8	66.15	75.62	79.74	62.5	73.31	75.82	55.08	74.16	69.42	69.74	64.05	78.95	58.61	62.38	69.1	69.87	66.06	62.51	71.66	77.22
883.72	80.91	73.71	77.34	66.23	79.73	76.92	78.77	66.08	75.58	79.7	62.47	73.25	75.77	55.07	74.12	69.37	69.68	64.03	78.89	58.52	62.3	69.01	69.83	65.97	62.4	71.59	77.18
884.2	80.88	73.66	77.28	66.16	79.7	76.88	78.73	66.02	75.54	79.65	62.45	73.19	75.73	55.06	74.09	69.33	69.62	64.02	78.84	58.43	62.23	68.93	69.79	65.88	62.29	71.53	77.15
884.68	80.85	73.61	77.22	66.1	79.67	76.85	78.7	65.95	75.5	79.6	62.44	73.13	75.68	55.06	74.06	69.29	69.56	64.01	78.78	58.34	62.16	68.85	69.75	65.79	62.18	71.47	77.12
885.17	80.83	73.57	77.16	66.05	79.64	76.81	78.66	65.89	75.47	79.56	62.42	73.07	75.64	55.06	74.03	69.25	69.5	64.01	78.72	58.25	62.09	68.77	69.71	65.71	62.06	71.41	77.09
885.65	80.8	73.52	77.11	65.99	79.6	76.78	78.63	65.82	75.44	79.51	62.41	73.02	75.6	55.06	74.01	69.21	69.45	64.01	78.67	58.17	62.02	68.69	69.68	65.62	61.95	71.34	77.07
886.13	80.77	73.47	77.05	65.94	79.57	76.74	78.59	65.76	75.41	79.47	62.4	72.96	75.56	55.07	73.98	69.18	69.39	64.01	78.62	58.08	61.95	68.61	69.64	65.54	61.84	71.28	77.04
886.61	80.74	73.43	76.99	65.89	79.54	76.71	78.56	65.7	75.38	79.43	62.4	72.9	75.52	55.08	73.96	69.14	69.33	64.02	78.56	58	61.88	68.53	69.61	65.45	61.73	71.22	77.02
887.09	80.71	73.38	76.94	65.84	79.52	76.68	78.53	65.64	75.35	79.39	62.39	72.85	75.48	55.09	73.94	69.11	69.28	64.04	78.51	57.91	61.82	68.46	69.58	65.37	61.62	71.16	77
887.58	80.68	73.34	76.88	65.79	79.49	76.65	78.49	65.58	75.33	79.35	62.39	72.8	75.45	55.11	73.92	69.08	69.23	64.05	78.46	57.83	61.75	68.38	69.55	65.29	61.51	71.1	76.98
888.06	80.65	73.3	76.83	65.75	79.46	76.62	78.46	65.53	75.31	79.31	62.4	72.74	75.41	55.14	73.9	69.04	69.18	64.07	78.41	57.75	61.69	68.31	69.52	65.2	61.4	71.05	76.96
888.54	80.62	73.26	76.77	65.7	79.44	76.59	78.43	65.47	75.29	79.27	62.4	72.69	75.38	55.16	73.89	69.01	69.13	64.1	78.36	57.68	61.63	68.24	69.5	65.12	61.29	70.99	76.95
889.02	80.6	73.22	76.71	65.66	79.41	76.56	78.41	65.41	75.27	79.23	62.41	72.64	75.35	55.19	73.87	68.99	69.08	64.12	78.31	57.6	61.56	68.17	69.47	65.04	61.18	70.93	76.93
889.51	80.57	73.17	76.66	65.62	79.39	76.53	78.38	65.36	75.25	79.19	62.42	72.59	75.32	55.22	73.86	68.96	69.03	64.15	78.26	57.52	61.5	68.1	69.45	64.96	61.07	70.87	76.92
889.99	80.55	73.13	76.61	65.59	79.37	76.5	78.35	65.31	75.23	79.15	62.43	72.54	75.29	55.25	73.85	68.93	68.99	64.18	78.21	57.45	61.44	68.03	69.43	64.87	60.96	70.82	76.91
890.47	80.52	73.09	76.56	65.55	79.34	76.48	78.33	65.25	75.21	79.11	62.44	72.49	75.25	55.29	73.83	68.9	68.94	64.21	78.16	57.37	61.38	67.96	69.4	64.79	60.86	70.76	76.9
890.95	80.5	73.05	76.51	65.51	79.32	76.45	78.3	65.2	75.19	79.07	62.45	72.45	75.22	55.32	73.82	68.88	68.9	64.24	78.12	57.3	61.32	67.89	69.38	64.71	60.75	70.7	76.88
891.43	80.49	73.01	76.46	65.48	79.3	76.43	78.28	65.15	75.17	79.04	62.47	72.4	75.19	55.35	73.81	68.85	68.85	64.27	78.07	57.23	61.26	67.82	69.36	64.63	60.64	70.64	76.87
891.92	80.47	72.97	76.41	65.44	79.28	76.41	78.25	65.1	75.16	79	62.48	72.35	75.16	55.39	73.79	68.83	68.81	64.3	78.03	57.15	61.2	67.76	69.34	64.55	60.53	70.59	76.87
892.4	80.46	72.93	76.36	65.4	79.26	76.38	78.23	65.05	75.14	78.96	62.49	72.3	75.13	55.42	73.77	68.8	68.77	64.33	77.98	57.08	61.14	67.69	69.32	64.47	60.42	70.53	76.85
892.88	80.44	72.89	76.31	65.36	79.24	76.36	78.21	65	75.12	78.92	62.5	72.25	75.09	55.44	73.75	68.77	68.72	64.36	77.94	57.01	61.08	67.62	69.29	64.39	60.31	70.46	76.84
893.36	80.42	72.85	76.26	65.32	79.22	76.33	78.18	64.95	75.09	78.87	62.5	72.2	75.05	55.46	73.72	68.74	68.67	64.38	77.89	56.93	61.01	67.55	69.26	64.31	60.2	70.4	76.83
893.84	80.41	72.81	76.2	65.28	79.2	76.3	78.16	64.89	75.07	78.83	62.5	72.14	75	55.47	73.69	68.71	68.62	64.4	77.84	56.85	60.94	67.48	69.23	64.22	60.09	70.33	76.81
894.33	80.39	72.76	76.14	65.23	79.17	76.27	78.13	64.83	75.04	78.78	62.49	72.08	74.95	55.48	73.65	68.67	68.57	64.42	77.79	56.77	60.87	67.41	69.2	64.13	59.97	70.26	76.79
894.81	80.36	72.72	76.08	65.18	79.13	76.23	78.09	64.77	75.01	78.72	62.48	72.02	74.9	55.47	73.6	68.63	68.51	64.42	77.74	56.68	60.79	67.33	69.16	64.04	59.86	70.18	76.77
895.29	80.34	72.66	76.01	65.13	79.1	76.18	78.06	64.7	74.97	78.67	62.46	71.95	74.84	55.45	73.55	68.58	68.44	64.41	77.68	56.59	60.7	67.25	69.11	63.94	59.74	70.1	76.74
895.77	80.3	72.61	75.94	65.07	79.06	76.14	78.02	64.62	74.92	78.6	62.42	71.88	74.77	55.42	73.48	68.53	68.37	64.4	77.61	56.49	60.61	67.16	69.06	63.84	59.63	70.02	76.7
896.26	80.26	72.55	75.87	65	79.01	76.08	77.97	64.54	74.87	78.54	62.38	71.8	74.7	55.37	73.42	68.48	68.3	64.37	77.55	56.39	60.51	67.06	68.99	63.74	59.51	69.93	76.66
896.74	80.22	72.48	75.79	64.92	78.96	76.02	77.92	64.45	74.8	78.46	62.32	71.71	74.62	55.31	73.34	68.41	68.21	64.33	77.48	56.28	60.4	66.97	68.93	63.63	59.38	69.84	76.61
897.22	80.16	72.4	75.71	64.84	78.9	75.95	77.86	64.35	74.73	78.39	62.25	71.62	74.54	55.23	73.26	68.34	68.12	64.27	77.4	56.16	60.29	66.86	68.84	63.51	59.26	69.75	76.55
897.7	80.1	72.32	75.62	64.74	78.83	75.88	77.8	64.24	74.65	78.31	62.17	71.52	74.45	55.14	73.17	68.25	68.02	64.2	77.32	56.03	60.17	66.75	68.75	63.39	59.13	69.64	76.49
898.18	80.04	72.24	75.53	64.64	78.76	75.79	77.73	64.13	74.57	78.22	62.08	71.42	74.35	55.03	73.08	68.16	67.92	64.12	77.23	55.9	60.05	66.63	68.66	63.27	58.99	69.54	76.42
898.67	79.96	72.15	75.44	64.52	78.68	75.71	77.66	64.01	74.48	78.14	61.97	71.31	74.26	54.91	72.99	68.07	67.81	64.03	77.14	55.77	59.92	66.52	68.55	63.15	58.86	69.43	76.34
899.15	79.89	72.05	75.34	64.4	78.6	75.61	77.58	63.88	74.38	78.05	61.85	71.2	74.15	54.78	72.89	67.97	67.7	63.92	77.05	55.63	59.79	66.39	68.44	63.02	58.73	69.32	76.26
899.63	79.81	71.95	75.24	64.28	78.52	75.52	77.5	63.75	74.28	77.95	61.73	71.09	74.05	54.64	72.79	67.86	67.58	63.8	76.95	55.49	59.65	66.27	68.32	62.89	58.59	69.21	76.17
900.11	79.72	71.84	75.13	64.14	78.43	75.41	77.42	63.61	74.17	77.86	61.59	70.97	73.95	54.5	72.69	67.75	67.46	63.68	76.85	55.34	59.51	66.15	68.2	62.75	58.46	69.1	76.07
900.59	79.64	71.74	75.03	64	78.34	75.31	77.33	63.47	74.06	77.77	61.45	70.85	73.84	54.34	72.58	67.63	67.33	63.55	76.76	55.2	59.37	66.02	68.08	62.62	58.32	68.98	75.97
901.08	79.55	71.63	74.92	63.86	78.25	75.2	77.24	63.33	73.95	77.67	61.31	70.73	73.74	54.18	72.48	67.51	67.21	63.41	76.65	55.05	59.23	65.89	67.95	62.48	58.18	68.87	75.87
901.56	79.46	71.51	74.81	63.72	78.16	75.1	77.15	63.18	73.84	77.57	61.16	70.61	73.63	54.02	72.38	67.39	67.08	63.27	76.55	54.9	59.08	65.76	67.82	62.35	58.05	68.75	75.77
902.04	79.38	71.4	74.7	63.57	78.06	74.99	77.06	63.03	73.73	77.48	61	70.49	73.52	53.86	72.27	67.27	66.95	63.12	76.45	54.75	58.93	65.64	67.69	62.21	57.91	68.63	75.67
902.52	79.29	71.29	74.59	63.43	77.97	74.88	76.96	62.88	73.62	77.38	60.85	70.37	73.42	53.69	72.17	67.15	66.82	62.98	76.35	54.6	58.79	65.51	67.57	62.08	57.77	68.51	75.56
903	79.21	71.18	74.49	63.29	77.88	74.77	76.87	62.74	73.51	77.29	60.7	70.25	73.32	53.53	72.07	67.03	66.69	62.83	76.25	54.45	58.64	65.38	67.44	61.95	57.64	68.4	75.46
903.49	79.13	71.07	74.38	63.15	77.78	74.66	76.78	62.59	73.4	77.19	60.55	70.13	73.21	53.37	71.97	66.91	66.57	62.69	76.15	54.3	58.5	65.25	67.32	61.82	57.51	68.28	75.36
903.97	79.05	70.96	74.28	63.01	77.69	74.56	76.69	62.45	73.29	77.1	60.4	70.02	73.11	53.21	71.87	66.79	66.44	62.55	76.05	54.16	58.35	65.13	67.19	61.69	57.38	68.17	75.26
904.45	78.97	70.85	74.17	62.88	77.6	74.45	76.61	62.31	73.18	77.01	60.26	69.9	73.01	53.05	71.77	66.67	66.31	62.41	75.95	54.02	58.21	65.01	67.07	61.56	57.25	68.05	75.16
904.93	78.89	70.74	74.06	62.74	77.51	74.35	76.52	62.17	73.08	76.91	60.11	69.79	72.91	52.9	71.67	66.56	66.18	62.28	75.85	53.87	58.07	64.88	66.95	61.43	57.11	67.94	75.06
905.42	78.82	70.64	73.96	62.61	77.42	74.25	76.44	62.03	72.97	76.82	59.97	69.67	72.81	52.75	71.57	66.44	66.06	62.14	75.75	53.73	57.93	64.76	66.84	61.3	56.98	67.83	74.96
905.9	78.74	70.54	73.85	62.47	77.33	74.14	76.35	61.89	72.87	76.73	59.83	69.56	72.72	52.61	71.47	66.32	65.93	62.01	75.65	53.59	57.79	64.64	66.72	61.17	56.85	67.71	74.86
906.38	78.66	70.43	73.75	62.34	77.25	74.04	76.27	61.76	72.76	76.64	59.7	69.45	72.62	52.47	71.37	66.21	65.81	61.89	75.56	53.45	57.66	64.52	66.61	61.04	56.71	67.6	74.77
906.86	78.58	70.33	73.65	62.22	77.16	73.94	76.19	61.63	72.66	76.55	59.57	69.34	72.52	52.34	71.27	66.1	65.69	61.76	75.46	53.32	57.52	64.4	66.49	60.91	56.58	67.49	74.68
907.34	78.5	70.24	73.55	62.09	77.08	73.84	76.11	61.5	72.56	76.46	59.44	69.23	72.43	52.21	71.18	65.98	65.57	61.64	75.37	53.18	57.39	64.28	66.38	60.79	56.45	67.38	74.59
907.83	78.42	70.14	73.45	61.97	76.99	73.75	76.03	61.37	72.46	76.37	59.31	69.12	72.33	52.08	71.08	65.87	65.45	61.53	75.28	53.05	57.26	64.17	66.27	60.66	56.32	67.27	74.5
908.31	78.34	70.04	73.35	61.85	76.91	73.65	75.95	61.24	72.36	76.28	59.19	69.01	72.24	51.95	70.98	65.76	65.33	61.41	75.18	52.91	57.13	64.05	66.17	60.53	56.19	67.16	74.41
908.79	78.26	69.94	73.24	61.72	76.83	73.55	75.87	61.11	72.27	76.19	59.06	68.9	72.15	51.83	70.89	65.64	65.21	61.3	75.09	52.77	57	63.94	66.06	60.41	56.05	67.05	74.32
909.27	78.18	69.83	73.14	61.6	76.74	73.45	75.79	60.98	72.17	76.1	58.94	68.79	72.05	51.7	70.79	65.53	65.09	61.18	74.99	52.64	56.87	63.82	65.95	60.28	55.92	66.94	74.23
909.75	78.09	69.73	73.04	61.48	76.66	73.36	75.71	60.85	72.07	76.01	58.82	68.68	71.96	51.58	70.7	65.41	64.97	61.07	74.9	52.5	56.73	63.7	65.84	60.15	55.78	66.83	74.14
910.24	78.01	69.63	72.94	61.36	76.58	73.26	75.63	60.72	71.97	75.92	58.7	68.57	71.86	51.46	70.6	65.3	64.85	60.96	74.8	52.36	56.6	63.59	65.73	60.02	55.65	66.72	74.05
910.72	77.93	69.52	72.84	61.24	76.49	73.16	75.55	60.59	71.87	75.83	58.58	68.46	71.77	51.33	70.51	65.18	64.73	60.85	74.71	52.23	56.47	63.47	65.62	59.89	55.52	66.61	73.96
911.2	77.85	69.42	72.74	61.12	76.4	73.07	75.47	60.46	71.76	75.74	58.46	68.35	71.67	51.21	70.41	65.07	64.61	60.74	74.61	52.09	56.34	63.36	65.51	59.76	55.38	66.5	73.86
911.68	77.77	69.31	72.64	60.99	76.32	72.97	75.39	60.33	71.66	75.65	58.33	68.24	71.58	51.09	70.32	64.95	64.49	60.63	74.52	51.96	56.21	63.24	65.4	59.63	55.25	66.39	73.77
912.16	77.69	69.2	72.54	60.87	76.23	72.87	75.31	60.2	71.56	75.55	58.21	68.12	71.48	50.96	70.22	64.83	64.37	60.52	74.42	51.82	56.08	63.12	65.29	59.5	55.11	66.28	73.68
912.65	77.62	69.09	72.43	60.74	76.14	72.77	75.22	60.07	71.46	75.46	58.09	68.01	71.39	50.84	70.12	64.71	64.25	60.41	74.32	51.68	55.95	63	65.17	59.37	54.97	66.16	73.58
913.13	77.54	68.98	72.33	60.62	76.06	72.67	75.14	59.93	71.35	75.37	57.96	67.9	71.29	50.71	70.03	64.59	64.13	60.3	74.22	51.54	55.81	62.88	65.06	59.23	54.83	66.05	73.49
913.61	77.47	68.87	72.22	60.49	75.97	72.57	75.05	59.79	71.25	75.27	57.83	67.78	71.19	50.58	69.93	64.47	64	60.18	74.13	51.4	55.67	62.76	64.94	59.1	54.69	65.93	73.39
914.09	77.4	68.76	72.11	60.36	75.88	72.46	74.96	59.66	71.14	75.18	57.71	67.66	71.09	50.45	69.83	64.35	63.88	60.07	74.03	51.26	55.53	62.64	64.83	58.96	54.54	65.82	73.3
914.58	77.32	68.65	72.01	60.24	75.79	72.36	74.87	59.52	71.04	75.08	57.58	67.55	70.99	50.33	69.73	64.22	63.75	59.95	73.92	51.11	55.39	62.52	64.71	58.82	54.4	65.7	73.2
915.06	77.25	68.54	71.9	60.11	75.7	72.26	74.79	59.38	70.93	74.98	57.45	67.43	70.89	50.2	69.64	64.1	63.63	59.84	73.82	50.97	55.25	62.39	64.59	58.69	54.26	65.58	73.1
915.54	77.18	68.43	71.79	59.98	75.61	72.15	74.7	59.24	70.82	74.89	57.32	67.32	70.79	50.07	69.54	63.98	63.5	59.72	73.72	50.83	55.11	62.27	64.47	58.55	54.11	65.46	73
916.02	77.1	68.32	71.68	59.85	75.51	72.05	74.61	59.1	70.71	74.79	57.19	67.2	70.69	49.94	69.44	63.85	63.37	59.61	73.61	50.68	54.96	62.14	64.35	58.41	53.97	65.34	72.9
916.5	77.02	68.21	71.56	59.72	75.42	71.94	74.52	58.96	70.6	74.69	57.06	67.08	70.59	49.81	69.34	63.72	63.24	59.49	73.51	50.53	54.82	62.01	64.23	58.27	53.82	65.22	72.8
916.99	76.94	68.1	71.45	59.59	75.32	71.83	74.43	58.82	70.48	74.59	56.93	66.95	70.48	49.68	69.24	63.59	63.11	59.37	73.4	50.37	54.67	61.88	64.11	58.12	53.67	65.09	72.7
917.47	76.86	67.98	71.33	59.46	75.23	71.72	74.34	58.67	70.37	74.49	56.8	66.83	70.38	49.55	69.14	63.46	62.98	59.25	73.29	50.22	54.52	61.75	63.99	57.98	53.53	64.97	72.6
917.95	76.77	67.87	71.22	59.32	75.13	71.61	74.24	58.53	70.25	74.38	56.66	66.71	70.27	49.41	69.03	63.33	62.85	59.12	73.18	50.06	54.37	61.62	63.87	57.83	53.38	64.84	72.5
918.43	76.69	67.75	71.1	59.19	75.03	71.5	74.15	58.38	70.14	74.28	56.53	66.58	70.16	49.28	68.93	63.2	62.71	59	73.07	49.91	54.22	61.49	63.74	57.69	53.23	64.72	72.39
918.91	76.59	67.63	70.98	59.05	74.93	71.38	74.06	58.23	70.02	74.17	56.39	66.46	70.05	49.14	68.82	63.06	62.58	58.87	72.95	49.75	54.07	61.36	63.62	57.54	53.07	64.59	72.29
919.4	76.5	67.51	70.86	58.91	74.83	71.27	73.96	58.08	69.9	74.07	56.25	66.33	69.95	49	68.72	62.93	62.44	58.75	72.84	49.59	53.91	61.22	63.49	57.39	52.92	64.46	72.18
919.88	76.41	67.39	70.74	58.77	74.73	71.15	73.87	57.93	69.78	73.96	56.11	66.2	69.83	48.86	68.61	62.79	62.3	58.62	72.72	49.43	53.76	61.08	63.36	57.24	52.77	64.33	72.07
920.36	76.31	67.27	70.61	58.62	74.63	71.04	73.77	57.78	69.66	73.85	55.97	66.07	69.72	48.72	68.5	62.66	62.16	58.49	72.6	49.27	53.6	60.94	63.23	57.09	52.61	64.19	71.96
920.84	76.21	67.15	70.49	58.47	74.53	70.92	73.67	57.62	69.54	73.74	55.83	65.94	69.61	48.57	68.39	62.52	62.02	58.36	72.48	49.11	53.44	60.8	63.1	56.93	52.44	64.06	71.85
921.33	76.11	67.02	70.36	58.33	74.42	70.8	73.58	57.46	69.41	73.63	55.68	65.8	69.49	48.43	68.28	62.38	61.87	58.23	72.36	48.94	53.28	60.66	62.97	56.78	52.28	63.93	71.73
921.81	76.02	66.89	70.24	58.18	74.32	70.68	73.48	57.31	69.28	73.51	55.53	65.67	69.38	48.28	68.17	62.24	61.73	58.09	72.23	48.77	53.12	60.52	62.84	56.62	52.12	63.79	71.62
922.29	75.92	66.77	70.11	58.03	74.21	70.55	73.38	57.15	69.15	73.4	55.39	65.53	69.26	48.13	68.05	62.1	61.59	57.96	72.11	48.61	52.96	60.37	62.7	56.46	51.95	63.65	71.51
922.77	75.83	66.64	69.98	57.88	74.11	70.43	73.27	56.99	69.02	73.29	55.24	65.4	69.14	47.98	67.94	61.97	61.44	57.82	71.98	48.44	52.79	60.22	62.56	56.3	51.78	63.52	71.39
923.25	75.73	66.5	69.85	57.72	74	70.31	73.17	56.83	68.89	73.18	55.09	65.26	69.02	47.83	67.82	61.83	61.29	57.69	71.85	48.27	52.63	60.08	62.43	56.14	51.61	63.38	71.27
923.74	75.64	66.37	69.72	57.57	73.89	70.18	73.07	56.66	68.76	73.06	54.94	65.12	68.9	47.68	67.71	61.68	61.14	57.55	71.72	48.09	52.46	59.93	62.29	55.97	51.44	63.24	71.15
924.22	75.54	66.23	69.59	57.42	73.78	70.05	72.96	56.5	68.62	72.94	54.79	64.98	68.78	47.52	67.59	61.54	60.99	57.41	71.59	47.91	52.29	59.77	62.14	55.8	51.27	63.09	71.03
924.7	75.45	66.1	69.45	57.26	73.66	69.92	72.85	56.33	68.48	72.82	54.63	64.83	68.66	47.36	67.47	61.39	60.84	57.27	71.45	47.73	52.12	59.61	62	55.63	51.09	62.95	70.91
925.18	75.35	65.96	69.31	57.1	73.55	69.79	72.74	56.16	68.34	72.71	54.47	64.69	68.53	47.2	67.34	61.24	60.69	57.12	71.32	47.55	51.95	59.45	61.85	55.46	50.91	62.8	70.78
925.66	75.26	65.82	69.17	56.95	73.43	69.66	72.63	55.99	68.2	72.58	54.31	64.54	68.41	47.04	67.22	61.09	60.54	56.97	71.18	47.37	51.77	59.29	61.7	55.28	50.73	62.65	70.66
926.15	75.16	65.68	69.04	56.79	73.31	69.53	72.52	55.82	68.05	72.46	54.15	64.39	68.28	46.88	67.09	60.94	60.38	56.83	71.04	47.18	51.59	59.13	61.55	55.11	50.55	62.5	70.53
926.63	75.06	65.54	68.9	56.63	73.19	69.39	72.41	55.64	67.91	72.34	53.99	64.24	68.15	46.71	66.97	60.78	60.23	56.68	70.89	47	51.41	58.97	61.4	54.93	50.37	62.35	70.4
927.11	74.96	65.4	68.75	56.46	73.07	69.26	72.29	55.47	67.76	72.21	53.83	64.08	68.02	46.54	66.84	60.63	60.07	56.53	70.75	46.81	51.23	58.8	61.24	54.76	50.19	62.19	70.27
927.59	74.86	65.26	68.61	56.3	72.94	69.12	72.18	55.29	67.62	72.08	53.66	63.93	67.89	46.38	66.71	60.47	59.91	56.37	70.6	46.62	51.05	58.63	61.09	54.58	50	62.04	70.14
928.07	74.76	65.12	68.46	56.13	72.82	68.98	72.06	55.11	67.47	71.95	53.5	63.77	67.75	46.21	66.58	60.31	59.75	56.22	70.45	46.43	50.86	58.46	60.93	54.39	49.81	61.88	70
928.56	74.65	64.97	68.31	55.97	72.69	68.83	71.94	54.92	67.31	71.82	53.33	63.61	67.61	46.03	66.45	60.15	59.59	56.06	70.3	46.23	50.67	58.29	60.77	54.21	49.62	61.72	69.86
929.04	74.54	64.83	68.16	55.8	72.56	68.69	71.82	54.74	67.16	71.69	53.15	63.44	67.48	45.86	66.31	59.98	59.42	55.9	70.14	46.04	50.48	58.11	60.61	54.02	49.43	61.56	69.72
929.52	74.43	64.68	68.01	55.62	72.43	68.55	71.7	54.55	67	71.56	52.98	63.28	67.34	45.68	66.18	59.82	59.26	55.74	69.99	45.84	50.29	57.94	60.44	53.83	49.24	61.39	69.58
930	74.31	64.53	67.86	55.45	72.3	68.4	71.58	54.37	66.85	71.42	52.81	63.11	67.2	45.5	66.04	59.65	59.09	55.59	69.83	45.64	50.09	57.76	60.28	53.64	49.04	61.23	69.43
930.49	74.2	64.37	67.71	55.28	72.17	68.25	71.45	54.18	66.69	71.29	52.64	62.95	67.06	45.32	65.9	59.49	58.92	55.42	69.67	45.44	49.9	57.58	60.11	53.45	48.84	61.06	69.29
930.97	74.08	64.22	67.55	55.1	72.03	68.11	71.33	53.99	66.53	71.15	52.46	62.78	66.91	45.14	65.77	59.32	58.75	55.26	69.51	45.23	49.7	57.4	59.94	53.26	48.65	60.9	69.14
931.45	73.96	64.06	67.39	54.93	71.9	67.96	71.2	53.8	66.36	71.01	52.28	62.61	66.77	44.96	65.63	59.15	58.58	55.1	69.35	45.03	49.5	57.21	59.77	53.07	48.45	60.73	68.99
931.93	73.84	63.9	67.23	54.75	71.76	67.8	71.08	53.61	66.2	70.87	52.1	62.44	66.62	44.77	65.48	58.98	58.4	54.93	69.18	44.82	49.3	57.03	59.6	52.87	48.25	60.56	68.84
932.41	73.72	63.74	67.07	54.57	71.62	67.65	70.95	53.42	66.03	70.73	51.92	62.26	66.48	44.58	65.34	58.81	58.23	54.77	69.02	44.62	49.1	56.84	59.42	52.67	48.05	60.38	68.69
932.9	73.6	63.58	66.91	54.39	71.48	67.5	70.82	53.22	65.87	70.59	51.74	62.09	66.33	44.39	65.19	58.63	58.05	54.6	68.85	44.41	48.89	56.65	59.25	52.47	47.84	60.21	68.53
933.38	73.48	63.42	66.75	54.2	71.34	67.34	70.69	53.02	65.7	70.44	51.55	61.92	66.18	44.21	65.05	58.46	57.88	54.43	68.68	44.2	48.68	56.47	59.07	52.27	47.64	60.04	68.38
933.86	73.36	63.26	66.58	54.02	71.2	67.18	70.56	52.83	65.53	70.3	51.37	61.74	66.03	44.02	64.9	58.28	57.7	54.26	68.51	43.99	48.48	56.28	58.89	52.07	47.44	59.86	68.22
934.34	73.24	63.09	66.42	53.83	71.05	67.02	70.43	52.63	65.36	70.16	51.18	61.56	65.88	43.83	64.75	58.11	57.52	54.08	68.34	43.78	48.27	56.09	58.71	51.86	47.23	59.68	68.07
934.82	73.12	62.93	66.25	53.64	70.91	66.87	70.3	52.43	65.19	70.01	50.99	61.39	65.73	43.63	64.6	57.93	57.34	53.91	68.16	43.57	48.06	55.89	58.53	51.66	47.03	59.51	67.91
935.31	73	62.76	66.08	53.45	70.76	66.71	70.17	52.23	65.01	69.87	50.8	61.21	65.58	43.44	64.45	57.75	57.16	53.73	67.99	43.36	47.85	55.7	58.35	51.45	46.82	59.33	67.75
935.79	72.88	62.6	65.91	53.26	70.62	66.55	70.04	52.03	64.84	69.72	50.61	61.03	65.42	43.25	64.3	57.57	56.98	53.55	67.81	43.15	47.64	55.5	58.16	51.25	46.61	59.15	67.59
936.27	72.76	62.44	65.74	53.07	70.47	66.38	69.9	51.83	64.66	69.57	50.41	60.85	65.27	43.05	64.15	57.38	56.8	53.37	67.64	42.93	47.43	55.31	57.98	51.04	46.4	58.97	67.43
936.75	72.65	62.27	65.57	52.87	70.32	66.22	69.77	51.63	64.48	69.42	50.22	60.66	65.11	42.86	63.99	57.2	56.61	53.19	67.46	42.72	47.22	55.11	57.79	50.83	46.19	58.78	67.27
937.24	72.53	62.11	65.41	52.68	70.17	66.06	69.63	51.43	64.3	69.28	50.02	60.48	64.96	42.66	63.84	57.02	56.43	53.01	67.28	42.5	47	54.91	57.61	50.62	45.98	58.6	67.1
937.72	72.4	61.94	65.24	52.49	70.02	65.9	69.49	51.23	64.12	69.13	49.83	60.3	64.81	42.46	63.68	56.84	56.25	52.83	67.11	42.29	46.79	54.71	57.42	50.41	45.78	58.42	66.94
938.2	72.28	61.78	65.07	52.29	69.87	65.74	69.35	51.03	63.94	68.98	49.63	60.12	64.65	42.26	63.53	56.65	56.06	52.65	66.93	42.07	46.58	54.52	57.23	50.2	45.57	58.24	66.77
938.68	72.16	61.61	64.9	52.1	69.72	65.58	69.21	50.82	63.76	68.83	49.44	59.93	64.5	42.07	63.37	56.47	55.88	52.47	66.75	41.85	46.37	54.32	57.04	49.99	45.36	58.05	66.6
939.16	72.03	61.45	64.73	51.91	69.57	65.41	69.07	50.62	63.58	68.68	49.24	59.75	64.34	41.87	63.21	56.28	55.69	52.28	66.57	41.64	46.16	54.12	56.85	49.78	45.15	57.87	66.43
939.65	71.9	61.28	64.55	51.71	69.41	65.25	68.93	50.42	63.4	68.52	49.04	59.56	64.18	41.67	63.05	56.1	55.5	52.1	66.39	41.42	45.95	53.92	56.66	49.57	44.94	57.69	66.26
940.13	71.77	61.11	64.38	51.52	69.26	65.08	68.79	50.22	63.21	68.37	48.84	59.38	64.03	41.47	62.89	55.91	55.32	51.91	66.21	41.2	45.74	53.72	56.47	49.36	44.73	57.5	66.09
940.61	71.64	60.94	64.21	51.33	69.1	64.92	68.64	50.01	63.03	68.22	48.65	59.19	63.87	41.27	62.73	55.73	55.13	51.72	66.03	40.99	45.52	53.52	56.28	49.15	44.53	57.32	65.92
941.09	71.5	60.77	64.03	51.14	68.95	64.75	68.5	49.81	62.85	68.07	48.45	59.01	63.71	41.07	62.57	55.54	54.94	51.54	65.85	40.77	45.31	53.32	56.09	48.94	44.32	57.14	65.75
941.57	71.37	61.11	64.38	51.52	69.26	65.08	68.79	50.22	63.21	68.37	48.84	59.38	64.03	41.47	62.89	55.91	55.32	51.91	66.21	41.2	45.74	53.72	56.47	49.36	44.73	57.5	66.09
942.06	71.23	60.94	64.21	51.33	69.1	64.92	68.64	50.01	63.03	68.22	48.65	59.19	63.87	41.27	62.73	55.73	55.13	51.72	66.03	40.99	45.52	53.52	56.28	49.15	44.53	57.32	65.92
942.54	71.1	60.77	64.03	51.14	68.95	64.75	68.5	49.81	62.85	68.07	48.45	59.01	63.71	41.07	62.57	55.54	54.94	51.54	65.85	40.77	45.31	53.32	56.09	48.94	44.32	57.14	65.75
943.02	70.96	60.6	63.86	50.94	68.79	64.58	68.36	49.61	62.67	67.92	48.25	58.82	63.55	40.87	62.42	55.36	54.76	51.35	65.67	40.55	45.1	53.12	55.89	48.73	44.11	56.95	65.58
943.5	70.83	60.42	63.69	50.75	68.64	64.42	68.21	49.41	62.49	67.76	48.05	58.64	63.39	40.67	62.26	55.17	54.57	51.16	65.49	40.34	44.89	52.92	55.7	48.53	43.91	56.77	65.41
943.98	70.69	60.25	63.51	50.56	68.48	64.25	68.07	49.2	62.31	67.61	47.85	58.45	63.23	40.47	62.1	54.98	54.38	50.98	65.31	40.12	44.68	52.72	55.51	48.32	43.7	56.59	65.23
944.47	70.56	60.08	63.34	50.37	68.33	64.08	67.92	49	62.12	67.46	47.65	58.27	63.08	40.27	61.94	54.8	54.2	50.79	65.13	39.9	44.47	52.52	55.32	48.11	43.5	56.41	65.06
944.95	70.43	59.91	63.17	50.18	68.17	63.91	67.77	48.8	61.94	67.31	47.45	58.08	62.92	40.06	61.78	54.61	54.01	50.6	64.95	39.69	44.27	52.32	55.12	47.9	43.3	56.22	64.89
945.43	70.3	59.73	63	49.99	68.01	63.75	67.63	48.6	61.76	67.16	47.25	57.9	62.76	39.86	61.62	54.42	53.83	50.42	64.77	39.47	44.06	52.13	54.93	47.7	43.09	56.04	64.72
945.91	70.18	59.56	62.83	49.8	67.86	63.58	67.49	48.39	61.58	67.01	47.05	57.71	62.6	39.66	61.46	54.24	53.64	50.23	64.6	39.26	43.85	51.93	54.73	47.49	42.89	55.86	64.54
946.4	70.05	59.39	62.66	49.62	67.7	63.41	67.34	48.19	61.4	66.85	46.85	57.53	62.44	39.47	61.3	54.05	53.46	50.04	64.42	39.05	43.65	51.73	54.54	47.29	42.69	55.68	64.37
946.88	69.93	59.21	62.49	49.43	67.55	63.25	67.2	48	61.22	66.71	46.65	57.34	62.28	39.27	61.14	53.87	53.28	49.86	64.25	38.84	43.45	51.54	54.35	47.08	42.49	55.5	64.2
947.36	69.8	59.04	62.32	49.24	67.39	63.08	67.06	47.8	61.04	66.56	46.45	57.16	62.13	39.07	60.98	53.68	53.09	49.67	64.07	38.63	43.24	51.34	54.15	46.88	42.3	55.32	64.03
947.84	69.68	58.87	62.15	49.05	67.24	62.92	66.91	47.6	60.87	66.41	46.26	56.98	61.97	38.88	60.82	53.5	52.91	49.49	63.9	38.43	43.05	51.15	53.96	46.68	42.1	55.14	63.86
948.32	69.56	58.71	61.98	48.87	67.09	62.75	66.77	47.41	60.69	66.26	46.06	56.8	61.82	38.69	60.66	53.31	52.73	49.3	63.73	38.22	42.85	50.96	53.77	46.48	41.91	54.96	63.69
948.81	69.43	58.54	61.81	48.69	66.93	62.59	66.63	47.21	60.52	66.11	45.86	56.63	61.67	38.5	60.5	53.13	52.55	49.11	63.56	38.02	42.65	50.77	53.58	46.28	41.72	54.78	63.51
949.29	69.31	58.37	61.65	48.5	66.78	62.43	66.49	47.02	60.34	65.97	45.67	56.45	61.51	38.31	60.35	52.95	52.37	48.93	63.39	37.82	42.45	50.58	53.4	46.09	41.54	54.61	63.34
949.77	69.18	58.21	61.48	48.32	66.63	62.27	66.35	46.83	60.17	65.82	45.47	56.28	61.36	38.12	60.19	52.77	52.2	48.74	63.23	37.63	42.26	50.4	53.21	45.89	41.35	54.43	63.17
950.25	69.06	58.05	61.32	48.14	66.48	62.11	66.21	46.64	60	65.68	45.28	56.1	61.21	37.94	60.03	52.59	52.02	48.56	63.06	37.43	42.07	50.21	53.03	45.7	41.17	54.26	63.01
950.73	68.93	57.89	61.16	47.97	66.33	61.95	66.07	46.45	59.83	65.54	45.09	55.93	61.06	37.75	59.88	52.41	51.85	48.38	62.9	37.24	41.88	50.03	52.84	45.51	40.99	54.09	62.84
951.22	68.81	57.73	61	47.8	66.18	61.79	65.93	46.27	59.66	65.39	44.9	55.77	60.92	37.57	59.72	52.23	51.68	48.2	62.74	37.05	41.69	49.85	52.66	45.32	40.81	53.92	62.67
951.7	68.68	57.57	60.85	47.62	66.04	61.63	65.79	46.08	59.5	65.25	44.71	55.6	60.77	37.39	59.57	52.05	51.5	48.02	62.58	36.87	41.51	49.67	52.49	45.13	40.64	53.75	62.51
952.18	68.55	57.41	60.69	47.45	65.89	61.48	65.66	45.9	59.33	65.11	44.52	55.43	60.63	37.22	59.42	51.88	51.33	47.84	62.43	36.68	41.33	49.49	52.31	44.95	40.47	53.59	62.34
952.66	68.43	57.26	60.54	47.28	65.75	61.32	65.52	45.72	59.17	64.98	44.34	55.27	60.48	37.04	59.27	51.7	51.17	47.66	62.27	36.5	41.15	49.31	52.13	44.77	40.29	53.42	62.18
953.14	68.3	57.1	60.39	47.11	65.6	61.17	65.39	45.54	59.01	64.84	44.15	55.11	60.34	36.87	59.12	51.53	51	47.48	62.12	36.32	40.97	49.14	51.96	44.59	40.12	53.26	62.02
953.63	68.18	56.95	60.24	46.94	65.46	61.02	65.25	45.36	58.85	64.7	43.97	54.95	60.2	36.7	58.97	51.36	50.83	47.31	61.97	36.15	40.8	48.97	51.79	44.41	39.96	53.1	61.86
954.11	68.06	56.8	60.09	46.77	65.32	60.87	65.12	45.18	58.7	64.57	43.79	54.79	60.06	36.53	58.82	51.18	50.67	47.13	61.82	35.97	40.63	48.81	51.62	44.24	39.79	52.94	61.7
954.59	67.94	56.65	59.95	46.61	65.19	60.72	64.99	45.01	58.54	64.43	43.61	54.63	59.92	36.36	58.68	51.01	50.51	46.96	61.68	35.8	40.46	48.64	51.45	44.07	39.63	52.78	61.54
955.07	67.83	56.5	59.81	46.45	65.05	60.57	64.86	44.84	58.39	64.3	43.44	54.48	59.78	36.2	58.54	50.85	50.35	46.79	61.54	35.64	40.29	48.48	51.28	43.9	39.47	52.63	61.39
955.56	67.72	56.35	59.67	46.29	64.92	60.43	64.73	44.68	58.24	64.17	43.26	54.33	59.64	36.04	58.4	50.68	50.19	46.62	61.4	35.47	40.13	48.32	51.12	43.73	39.31	52.48	61.24
956.04	67.61	56.2	59.53	46.13	64.79	60.29	64.61	44.51	58.1	64.05	43.09	54.18	59.51	35.88	58.26	50.52	50.04	46.46	61.26	35.31	39.97	48.17	50.96	43.57	39.16	52.33	61.09
956.52	67.5	56.06	59.39	45.97	64.65	60.15	64.48	44.35	57.95	63.92	42.92	54.03	59.38	35.72	58.12	50.36	49.89	46.3	61.13	35.15	39.82	48.01	50.8	43.41	39.01	52.19	60.94
957	67.4	55.91	59.26	45.82	64.53	60.01	64.36	44.19	57.81	63.8	42.75	53.89	59.25	35.56	57.98	50.2	49.74	46.13	61	35	39.66	47.86	50.65	43.26	38.86	52.04	60.79
957.48	67.3	55.77	59.13	45.67	64.4	59.87	64.24	44.03	57.67	63.68	42.58	53.75	59.12	35.41	57.85	50.04	49.6	45.97	60.87	34.85	39.51	47.71	50.5	43.11	38.72	51.9	60.64
957.97	67.2	55.64	59	45.52	64.28	59.74	64.12	43.88	57.54	63.56	42.42	53.61	58.99	35.26	57.71	49.89	49.45	45.82	60.74	34.7	39.36	47.57	50.35	42.96	38.57	51.76	60.5
958.45	67.1	55.5	58.88	45.37	64.15	59.61	64	43.73	57.41	63.44	42.26	53.47	58.87	35.11	57.58	49.74	49.31	45.66	60.62	34.56	39.22	47.43	50.2	42.81	38.44	51.63	60.36
958.93	67	55.37	58.76	45.23	64.04	59.48	63.89	43.58	57.28	63.33	42.1	53.34	58.75	34.97	57.46	49.6	49.17	45.51	60.5	34.42	39.08	47.29	50.06	42.67	38.31	51.5	60.22
959.41	66.91	55.24	58.64	45.09	63.92	59.36	63.77	43.43	57.15	63.22	41.94	53.21	58.63	34.83	57.33	49.45	49.04	45.36	60.39	34.29	38.94	47.15	49.92	42.53	38.18	51.37	60.08
959.89	66.81	55.12	58.52	44.95	63.81	59.24	63.66	43.29	57.03	63.11	41.79	53.08	58.51	34.69	57.2	49.31	48.91	45.21	60.28	34.15	38.8	47.02	49.78	42.39	38.05	51.24	59.95
960.38	66.72	55	58.41	44.81	63.69	59.12	63.56	43.15	56.91	63	41.64	52.96	58.39	34.55	57.08	49.18	48.78	45.07	60.17	34.02	38.67	46.89	49.64	42.26	37.93	51.12	59.82
960.86	66.62	54.88	58.3	44.68	63.58	59	63.45	43.01	56.79	62.89	41.49	52.84	58.28	34.42	56.96	49.04	48.65	44.92	60.06	33.89	38.54	46.76	49.51	42.13	37.81	50.99	59.68
961.34	66.53	54.76	58.19	44.55	63.48	58.88	63.34	42.87	56.68	62.79	41.35	52.72	58.17	34.29	56.84	48.91	48.53	44.78	59.96	33.77	38.42	46.64	49.38	42	37.69	50.87	59.56
961.82	66.43	54.65	58.09	44.42	63.37	58.77	63.24	42.74	56.56	62.69	41.21	52.6	58.06	34.16	56.73	48.78	48.4	44.64	59.86	33.64	38.3	46.51	49.26	41.88	37.58	50.76	59.43
962.31	66.34	54.53	57.98	44.3	63.27	58.66	63.14	42.61	56.46	62.59	41.07	52.49	57.95	34.04	56.61	48.66	48.28	44.5	59.76	33.52	38.18	46.4	49.13	41.76	37.47	50.65	59.31
962.79	66.25	54.42	57.88	44.18	63.16	58.55	63.04	42.49	56.35	62.5	40.93	52.38	57.85	33.92	56.5	48.53	48.17	44.36	59.67	33.41	38.06	46.28	49.01	41.64	37.37	50.54	59.19
963.27	66.15	54.32	57.79	44.06	63.07	58.44	62.95	42.37	56.25	62.4	40.8	52.27	57.74	33.8	56.39	48.41	48.06	44.22	59.58	33.3	37.95	46.17	48.9	41.53	37.27	50.43	59.07
963.75	66.06	54.21	57.69	43.95	62.97	58.34	62.85	42.25	56.15	62.31	40.67	52.17	57.64	33.68	56.28	48.29	47.94	44.09	59.49	33.19	37.85	46.06	48.78	41.42	37.17	50.32	58.96
964.23	65.98	54.11	57.6	43.84	62.87	58.24	62.76	42.13	56.06	62.22	40.54	52.07	57.55	33.57	56.18	48.18	47.84	43.96	59.41	33.08	37.74	45.95	48.67	41.31	37.08	50.22	58.85
964.72	65.89	54.01	57.51	43.72	62.78	58.14	62.67	42.02	55.96	62.14	40.42	51.97	57.45	33.46	56.07	48.06	47.73	43.83	59.33	32.98	37.64	45.85	48.56	41.2	36.99	50.12	58.74
965.2	65.81	53.91	57.42	43.62	62.69	58.04	62.58	41.91	55.87	62.05	40.3	51.87	57.35	33.35	55.97	47.95	47.63	43.71	59.25	32.88	37.54	45.75	48.46	41.1	36.9	50.02	58.63
965.68	65.73	53.81	57.34	43.51	62.61	57.95	62.5	41.81	55.79	61.97	40.18	51.77	57.26	33.24	55.87	47.85	47.53	43.59	59.17	32.78	37.45	45.65	48.35	41.01	36.82	49.93	58.53
966.16	65.66	53.72	57.26	43.41	62.52	57.86	62.42	41.71	55.7	61.89	40.06	51.68	57.17	33.14	55.78	47.74	47.43	43.47	59.1	32.69	37.35	45.56	48.25	40.91	36.74	49.84	58.43
966.64	65.59	53.63	57.18	43.31	62.44	57.78	62.34	41.61	55.62	61.81	39.94	51.6	57.09	33.03	55.68	47.64	47.34	43.35	59.03	32.6	37.26	45.47	48.15	40.82	36.66	49.75	58.33
967.13	65.52	53.54	57.1	43.21	62.36	57.69	62.26	41.51	55.55	61.74	39.83	51.51	57	32.93	55.59	47.55	47.25	43.23	58.97	32.51	37.18	45.38	48.06	40.74	36.59	49.67	58.23
967.61	65.46	53.45	57.03	43.12	62.28	57.61	62.18	41.42	55.47	61.67	39.72	51.43	56.92	32.84	55.5	47.45	47.16	43.12	58.9	32.43	37.1	45.3	47.97	40.65	36.52	49.58	58.14
968.09	65.39	53.37	56.96	43.02	62.2	57.53	62.11	41.33	55.4	61.6	39.62	51.35	56.84	32.74	55.41	47.36	47.08	43.01	58.84	32.35	37.02	45.22	47.88	40.57	36.45	49.5	58.05
968.57	65.33	53.29	56.89	42.94	62.13	57.45	62.04	41.24	55.33	61.53	39.51	51.27	56.76	32.65	55.32	47.28	46.99	42.91	58.78	32.27	36.94	45.14	47.79	40.49	36.38	49.43	57.96
969.05	65.28	53.21	56.82	42.85	62.06	57.38	61.97	41.16	55.26	61.46	39.41	51.2	56.68	32.56	55.24	47.19	46.91	42.8	58.72	32.19	36.86	45.07	47.71	40.41	36.32	49.35	57.87
969.54	65.22	53.14	56.76	42.77	61.99	57.31	61.9	41.07	55.2	61.4	39.31	51.13	56.61	32.47	55.15	47.11	46.84	42.7	58.67	32.12	36.79	44.99	47.62	40.34	36.26	49.28	57.78
970.02	65.16	53.07	56.7	42.69	61.92	57.24	61.83	41	55.13	61.34	39.21	51.05	56.54	32.39	55.07	47.03	46.76	42.6	58.61	32.05	36.72	44.92	47.55	40.27	36.2	49.21	57.7
970.5	65.11	53	56.65	42.62	61.86	57.17	61.77	40.92	55.08	61.28	39.12	50.99	56.47	32.3	54.99	46.95	46.69	42.5	58.57	31.99	36.65	44.86	47.47	40.21	36.14	49.14	57.62
970.98	65.05	52.93	56.59	42.54	61.8	57.11	61.71	40.84	55.02	61.22	39.03	50.92	56.4	32.22	54.91	46.87	46.62	42.4	58.52	31.92	36.59	44.79	47.4	40.14	36.09	49.07	57.54
971.47	65	52.87	56.54	42.48	61.74	57.04	61.65	40.77	54.96	61.16	38.94	50.86	56.33	32.14	54.84	46.8	46.55	42.31	58.47	31.86	36.53	44.73	47.32	40.08	36.04	49.01	57.46
971.95	64.94	52.81	56.49	42.41	61.68	56.98	61.59	40.7	54.91	61.1	38.86	50.79	56.27	32.07	54.76	46.73	46.48	42.22	58.43	31.8	36.46	44.67	47.25	40.02	35.99	48.95	57.39
972.43	64.89	52.75	56.44	42.35	61.62	56.93	61.53	40.63	54.86	61.05	38.77	50.73	56.21	31.99	54.69	46.65	46.42	42.12	58.39	31.74	36.4	44.61	47.18	39.96	35.94	48.89	57.31
972.91	64.83	52.69	56.39	42.28	61.56	56.87	61.48	40.57	54.81	61	38.69	50.67	56.14	31.92	54.62	46.58	46.36	42.04	58.35	31.68	36.34	44.55	47.12	39.91	35.9	48.83	57.24
973.39	64.78	52.63	56.34	42.22	61.51	56.82	61.42	40.51	54.76	60.95	38.61	50.62	56.09	31.84	54.55	46.51	46.3	41.95	58.31	31.63	36.29	44.5	47.05	39.86	35.86	48.77	57.18
973.88	64.73	52.58	56.3	42.17	61.45	56.76	61.37	40.44	54.72	60.9	38.53	50.56	56.03	31.78	54.48	46.45	46.24	41.86	58.27	31.58	36.23	44.45	46.99	39.81	35.82	48.71	57.11
974.36	64.68	52.53	56.25	42.11	61.4	56.71	61.32	40.39	54.68	60.85	38.46	50.51	55.97	31.71	54.41	46.38	46.18	41.78	58.24	31.53	36.18	44.4	46.93	39.76	35.78	48.66	57.05
974.84	64.63	52.48	56.21	42.06	61.35	56.67	61.28	40.33	54.64	60.8	38.38	50.46	55.92	31.64	54.35	46.32	46.13	41.7	58.2	31.49	36.13	44.35	46.87	39.71	35.75	48.61	56.98
975.32	64.58	52.43	56.17	42.01	61.3	56.62	61.23	40.27	54.6	60.76	38.31	50.41	55.86	31.58	54.29	46.26	46.08	41.62	58.17	31.45	36.08	44.3	46.81	39.67	35.71	48.56	56.92
975.8	64.53	52.38	56.14	41.96	61.25	56.57	61.18	40.22	54.56	60.72	38.24	50.36	55.81	31.52	54.22	46.21	46.02	41.55	58.14	31.4	36.03	44.26	46.76	39.62	35.68	48.51	56.87
976.29	64.49	52.33	56.1	41.91	61.21	56.53	61.14	40.17	54.53	60.67	38.17	50.31	55.76	31.46	54.17	46.15	45.97	41.47	58.11	31.36	35.98	44.22	46.7	39.58	35.65	48.46	56.81
976.77	64.45	52.28	56.07	41.86	61.16	56.49	61.1	40.12	54.49	60.63	38.11	50.27	55.71	31.4	54.11	46.1	45.93	41.4	58.08	31.33	35.93	44.18	46.65	39.54	35.62	48.42	56.75
977.25	64.41	52.23	56.03	41.82	61.12	56.44	61.06	40.07	54.46	60.59	38.04	50.22	55.67	31.34	54.05	46.05	45.88	41.33	58.06	31.29	35.89	44.14	46.6	39.5	35.59	48.37	56.7
977.73	64.37	52.19	56	41.78	61.08	56.4	61.02	40.03	54.43	60.55	37.98	50.18	55.62	31.28	53.99	45.99	45.83	41.26	58.03	31.25	35.85	44.1	46.55	39.46	35.56	48.33	56.64
978.21	64.34	52.15	55.97	41.73	61.04	56.36	60.98	39.98	54.39	60.52	37.91	50.14	55.57	31.23	53.94	45.95	45.79	41.19	58.01	31.22	35.81	44.06	46.5	39.43	35.53	48.29	56.59
978.7	64.31	52.1	55.93	41.69	61	56.33	60.94	39.94	54.36	60.48	37.85	50.1	55.53	31.17	53.88	45.9	45.75	41.12	57.98	31.19	35.77	44.03	46.45	39.39	35.51	48.25	56.54
979.18	64.27	52.06	55.9	41.65	60.96	56.29	60.91	39.9	54.33	60.44	37.79	50.07	55.48	31.12	53.83	45.85	45.71	41.06	57.96	31.16	35.73	43.99	46.4	39.36	35.48	48.21	56.49
979.66	64.24	52.03	55.87	41.61	60.92	56.26	60.87	39.86	54.3	60.41	37.73	50.03	55.44	31.06	53.77	45.81	45.66	40.99	57.94	31.12	35.69	43.96	46.35	39.33	35.46	48.17	56.44
980.14	64.21	51.99	55.84	41.58	60.88	56.22	60.84	39.82	54.27	60.38	37.68	49.99	55.4	31.01	53.72	45.76	45.62	40.93	57.91	31.09	35.65	43.93	46.31	39.29	35.44	48.13	56.39
980.63	64.18	51.95	55.81	41.54	60.84	56.19	60.8	39.78	54.25	60.34	37.62	49.96	55.36	30.96	53.67	45.72	45.58	40.86	57.89	31.06	35.62	43.89	46.26	39.26	35.42	48.09	56.35
981.11	64.15	51.92	55.79	41.5	60.81	56.16	60.77	39.75	54.22	60.31	37.56	49.92	55.32	30.91	53.62	45.67	45.55	40.8	57.87	31.03	35.58	43.86	46.22	39.24	35.39	48.06	56.3
981.59	64.12	51.89	55.76	41.46	60.77	56.13	60.74	39.71	54.19	60.28	37.51	49.89	55.28	30.86	53.57	45.63	45.51	40.74	57.85	31.01	35.54	43.83	46.17	39.21	35.37	48.02	56.26
982.07	64.09	51.86	55.73	41.43	60.74	56.1	60.7	39.68	54.16	60.25	37.46	49.85	55.24	30.81	53.52	45.59	45.47	40.68	57.83	30.98	35.51	43.81	46.13	39.18	35.35	47.99	56.21
982.55	64.06	51.83	55.71	41.39	60.7	56.07	60.67	39.64	54.14	60.22	37.4	49.82	55.21	30.76	53.47	45.55	45.44	40.62	57.81	30.95	35.47	43.78	46.09	39.15	35.33	47.95	56.17
983.04	64.03	51.8	55.68	41.35	60.67	56.04	60.64	39.61	54.11	60.19	37.35	49.79	55.17	30.71	53.43	45.52	45.4	40.56	57.79	30.92	35.44	43.75	46.05	39.13	35.31	47.92	56.13
983.52	64	51.77	55.66	41.32	60.63	56.01	60.61	39.58	54.08	60.16	37.3	49.76	55.14	30.66	53.38	45.48	45.36	40.5	57.78	30.89	35.4	43.72	46.01	39.1	35.3	47.89	56.09
984	63.96	51.74	55.63	41.29	60.6	55.98	60.59	39.55	54.06	60.13	37.25	49.72	55.1	30.62	53.34	45.44	45.33	40.44	57.76	30.86	35.37	43.7	45.97	39.08	35.28	47.86	56.05
984.48	63.93	51.72	55.61	41.25	60.57	55.96	60.56	39.52	54.03	60.1	37.21	49.69	55.07	30.57	53.29	45.41	45.3	40.39	57.74	30.83	35.34	43.67	45.93	39.05	35.26	47.83	56.01
984.96	63.9	51.69	55.59	41.22	60.54	55.93	60.53	39.49	54	60.08	37.16	49.66	55.04	30.52	53.25	45.37	45.26	40.33	57.72	30.81	35.31	43.65	45.89	39.03	35.25	47.8	55.97
985.45	63.86	51.66	55.57	41.19	60.51	55.91	60.5	39.46	53.98	60.05	37.11	49.63	55	30.48	53.21	45.34	45.23	40.28	57.71	30.78	35.28	43.62	45.86	39	35.23	47.77	55.93
985.93	63.83	51.64	55.54	41.17	60.48	55.88	60.48	39.43	53.96	60.03	37.07	49.6	54.97	30.44	53.17	45.3	45.2	40.23	57.69	30.76	35.25	43.6	45.82	38.98	35.22	47.74	55.89
986.41	63.8	51.61	55.52	41.14	60.45	55.86	60.45	39.41	53.93	60	37.02	49.57	54.94	30.39	53.12	45.27	45.17	40.17	57.68	30.73	35.22	43.58	45.78	38.96	35.2	47.71	55.86
986.89	63.77	51.58	55.5	41.11	60.42	55.83	60.43	39.38	53.91	59.98	36.98	49.54	54.91	30.35	53.08	45.23	45.14	40.12	57.66	30.71	35.19	43.55	45.75	38.94	35.19	47.68	55.82
987.38	63.74	51.56	55.48	41.09	60.4	55.81	60.4	39.35	53.89	59.95	36.93	49.52	54.88	30.3	53.04	45.2	45.11	40.07	57.65	30.68	35.16	43.53	45.71	38.91	35.17	47.65	55.78
987.86	63.72	51.53	55.46	41.06	60.37	55.78	60.37	39.33	53.86	59.93	36.89	49.49	54.85	30.26	53	45.16	45.08	40.02	57.63	30.66	35.13	43.51	45.67	38.89	35.16	47.63	55.74
988.34	63.69	51.51	55.44	41.04	60.34	55.76	60.35	39.3	53.84	59.9	36.85	49.46	54.82	30.22	52.96	45.13	45.05	39.97	57.62	30.64	35.1	43.48	45.64	38.87	35.14	47.6	55.71
988.82	63.67	51.48	55.42	41.02	60.31	55.73	60.32	39.28	53.82	59.88	36.81	49.43	54.79	30.17	52.92	45.1	45.02	39.92	57.6	30.61	35.07	43.46	45.6	38.85	35.13	47.57	55.67
989.3	63.65	51.46	55.4	40.99	60.29	55.71	60.3	39.25	53.8	59.86	36.77	49.4	54.76	30.13	52.88	45.06	44.99	39.87	57.59	30.59	35.04	43.44	45.57	38.83	35.11	47.54	55.63
989.79	63.63	51.43	55.38	40.97	60.26	55.69	60.27	39.22	53.77	59.83	36.72	49.37	54.73	30.09	52.84	45.03	44.96	39.82	57.57	30.57	35.01	43.42	45.53	38.8	35.1	47.52	55.6
990.27	63.61	51.41	55.36	40.95	60.23	55.66	60.25	39.2	53.75	59.81	36.68	49.34	54.7	30.04	52.8	45	44.93	39.77	57.56	30.55	34.98	43.39	45.5	38.78	35.08	47.49	55.56
990.75	63.59	51.39	55.34	40.93	60.21	55.64	60.23	39.18	53.73	59.79	36.64	49.32	54.67	30	52.77	44.96	44.91	39.72	57.54	30.52	34.95	43.37	45.46	38.76	35.07	47.46	55.53
991.23	63.57	51.37	55.32	40.91	60.18	55.62	60.2	39.15	53.71	59.76	36.6	49.29	54.64	29.96	52.73	44.93	44.88	39.67	57.53	30.5	34.92	43.35	45.43	38.74	35.05	47.44	55.49
991.71	63.56	51.34	55.3	40.88	60.16	55.6	60.18	39.13	53.69	59.74	36.56	49.26	54.61	29.92	52.69	44.9	44.85	39.62	57.51	30.48	34.89	43.33	45.39	38.72	35.04	47.41	55.46
992.2	63.54	51.32	55.28	40.86	60.13	55.58	60.16	39.1	53.67	59.72	36.52	49.24	54.58	29.88	52.65	44.87	44.83	39.58	57.5	30.46	34.87	43.31	45.36	38.7	35.03	47.39	55.43
992.68	63.52	51.31	55.26	40.84	60.11	55.56	60.14	39.08	53.65	59.7	36.48	49.21	54.55	29.84	52.61	44.84	44.8	39.53	57.49	30.44	34.84	43.29	45.33	38.68	35.01	47.36	55.39
[truncated: 6,238 more rows]

## Sheet: BET isotherms
FA				SG				RHB				NCP				SEP				NA
[truncated: 36 more rows]
