# Supplementary material for: Mitigating heavy metals leachability from CO2 carbonated coal-based solid waste backfill in high-salinity environments via biochar-clay-nanomaterial synergistic modification
Source: Royal Society of Chemistry journal article supplement (doi:10.1039/d5ra09892k), 2026-04-22
Supplement: d5ra09892k2.pdf [file d5ra09892k2.pdf]

## Supplementary Information

# Mitigating heavy metals leachability from CO<sub>2</sub> carbonated coal-based solid waste backfill in high-salinity environments via biochar-clay-nanomaterial synergistic modification

Zhishang Zhang,<sup>abcd</sup> Liqiang Ma,<sup>\*abcd</sup> Ichhuy Ngo,<sup>\*a</sup> Kunpeng Yu,<sup>a</sup> Jiangtao Zhai,<sup>a</sup> Zezhou Guo,<sup>a</sup> Zhiyang Zhao,<sup>a</sup>

Chengkun Peng,<sup>a</sup> Ruizhi Yang<sup>a</sup>

<sup>a</sup> School of Mines, China University of Mining and Technology, Xuzhou 221116, China

<sup>b</sup> Xinjiang Key Laboratory of Coal-bearing Resources Exploration and Exploitation, Xinjiang Institute of Engineering, Urumqi 830023, China

<sup>c</sup> Xinjiang Engineering Research Center of Green Intelligent Coal Mining, Xinjiang Institute of Engineering, Urumqi 830023, China

<sup>d</sup> Key Laboratory of Xinjiang Coal Resources Green Mining (Xinjiang Institute of Engineering), Ministry of Education, Urumqi 830023, China

\* Liqiang Ma: Email: 4225@cumt.edu.cn

\* Ichhuy Ngo: Email: ngoichhuy@cumt.edu.cn

## Table of Contents

### Table Captions:

**Table S1.** Quality Control parameters and limits of detection/quantification for target elements analyzed by ICP-MS

**Table S2.** Comparison of TCLP leaching results for the raw materials and modified CCB with III-GQS and IV-GQS

**Table S3.** UCS of the modified samples

**Table S4.** Porosity of the modified samples

**Table S5.** The pH change of the solution

**Table S6.** Percentage reduction in heavy metal leaching across different modified CCB groups

**Table S7.** Comparison of heavy metal immobilization efficiency with previous works

### Figure Captions:

**Fig. S1.** N<sub>2</sub> adsorption-desorption isotherms of the different materials: (a) FA, (b) SG, (c) RHB, (d) NCP, (e) SEP, and (f) NA

**Fig. S2.** Acid-base titration curve

**Table S1.** Quality Control parameters and limits of detection/quantification for target elements

analyzed by ICP-MS

| Element | Calibration Range ( $\mu\text{g/L}$ ) | Standard Series ( $\mu\text{g/L}$ ) | Calibration Linearity ( $R^2$ ) | LOD ( $\mu\text{g/L}$ ) | LOQ ( $\mu\text{g/L}$ ) | Internal Standard | IS Recovery Range (%) |
|---------|---------------------------------------|-------------------------------------|---------------------------------|-------------------------|-------------------------|-------------------|-----------------------|
| Cr      | 0 - 500                               | 0, 5, 10, 20, 50, 100, 200, 500     | > 0.999                         | 0.11                    | 0.44                    | $^{103}\text{Rh}$ | 100.8 - 106.7         |
| Ni      | 0 - 500                               | 0, 5, 10, 20, 50, 100, 200, 500     | > 0.999                         | 0.06                    | 0.24                    | $^{103}\text{Rh}$ | 100.8 - 106.7         |
| Cu      | 0 - 500                               | 0, 5, 10, 20, 50, 100, 200, 500     | > 0.999                         | 0.08                    | 0.32                    | $^{103}\text{Rh}$ | 100.8 - 106.7         |
| Zn      | 0 - 500                               | 0, 5, 10, 20, 50, 100, 200, 500     | > 0.999                         | 0.67                    | 2.68                    | $^{103}\text{Rh}$ | 100.8 - 106.7         |
| As      | 0 - 500                               | 0, 5, 10, 20, 50, 100, 200, 500     | > 0.999                         | 0.12                    | 0.48                    | $^{103}\text{Rh}$ | 100.8 - 106.7         |
| Cd      | 0 - 500                               | 0, 5, 10, 20, 50, 100, 200, 500     | > 0.999                         | 0.05                    | 0.20                    | $^{185}\text{Re}$ | 85.0 - 102.3          |
| Pb      | 0 - 500                               | 0, 5, 10, 20, 50, 100, 200, 500     | > 0.999                         | 0.09                    | 0.36                    | $^{185}\text{Re}$ | 85.0 - 102.3          |
| Be      | 0 - 500                               | 0, 5, 10, 20, 50, 100, 200, 500     | > 0.999                         | 0.04                    | 0.16                    | $^{103}\text{Rh}$ | 100.8 - 106.7         |
| Ag      | 0 - 500                               | 0, 5, 10, 20, 50, 100, 200, 500     | > 0.999                         | 0.04                    | 0.16                    | $^{185}\text{Re}$ | 85.0 - 102.3          |
| Mn      | 0 - 500                               | 0, 5, 10, 20, 50, 100, 200, 500     | > 0.999                         | 0.12                    | 0.48                    | $^{103}\text{Rh}$ | 100.8 - 106.7         |

**Table S2.** Comparison of TCLP leaching results for the raw materials and modified CCB with III-

## GQS and IV-GQS

| Sample | Heavy metals | Concentration<br>( $\mu\text{g/L}$ ) | III-GQS<br>( $\mu\text{g/L}$ ) | Results | Met? | IV-GQS<br>( $\mu\text{g/L}$ ) | Results | Met? |
|--------|--------------|--------------------------------------|--------------------------------|---------|------|-------------------------------|---------|------|
| FA     | Cr           | 1002.57                              | 50                             | ↑       | No   | 100                           | ↑       | No   |
|        | Ni           | 151.07                               | 20                             | ↑       | No   | 100                           | ↑       | No   |
|        | Cu           | 529.61                               | 1000                           | ↓       | Yes  | 1500                          | ↓       | Yes  |
|        | Zn           | 796.85                               | 1000                           | ↓       | Yes  | 5000                          | ↓       | Yes  |
|        | As           | 181.16                               | 10                             | ↑       | No   | 50                            | ↑       | No   |
|        | Cd           | 2.88                                 | 5                              | ↓       | Yes  | 10                            | ↓       | Yes  |
|        | Pb           | 30.17                                | 10                             | ↑       | No   | 100                           | ↓       | Yes  |
|        | Be           | 22.43                                | 2                              | ↑       | No   | 60                            | ↓       | Yes  |
|        | Ag           | 1.19                                 | 50                             | ↓       | Yes  | 100                           | ↓       | Yes  |
|        | Mn           | 1910.14                              | 100                            | ↑       | No   | 1500                          | ↑       | No   |
|        | SG           | Cr                                   | 14.98                          | 50      | ↓    | Yes                           | 100     | ↓    |
| Ni     |              | 4.32                                 | 20                             | ↓       | Yes  | 100                           | ↓       | Yes  |
| Cu     |              | 14.23                                | 1000                           | ↓       | Yes  | 1500                          | ↓       | Yes  |
| Zn     |              | 19.84                                | 1000                           | ↓       | Yes  | 5000                          | ↓       | Yes  |
| As     |              | 2.46                                 | 10                             | ↓       | Yes  | 50                            | ↓       | Yes  |
| Cd     |              | 0                                    | 5                              | ↓       | Yes  | 10                            | ↓       | Yes  |
| Pb     |              | 6.26                                 | 10                             | ↓       | Yes  | 100                           | ↓       | Yes  |
| Be     |              | 0.16                                 | 2                              | ↓       | Yes  | 60                            | ↓       | Yes  |
| Ag     |              | 2239.39                              | 50                             | ↑       | No   | 100                           | ↑       | No   |
| Mn     |              | 7613.53                              | 100                            | ↑       | No   | 1500                          | ↑       | No   |
| CCB    |              | Cr                                   | 144.47                         | 50      | ↑    | No                            | 100     | ↑    |
|        | Ni           | 93.22                                | 20                             | ↑       | No   | 100                           | ↓       | Yes  |
|        | Cu           | 59.49                                | 1000                           | ↓       | Yes  | 1500                          | ↓       | Yes  |
|        | Zn           | 81.00                                | 1000                           | ↓       | Yes  | 5000                          | ↓       | Yes  |
|        | As           | 27.80                                | 10                             | ↑       | No   | 50                            | ↓       | Yes  |
|        | Cd           | 1.61                                 | 5                              | ↓       | Yes  | 10                            | ↓       | Yes  |
|        | Pb           | 18.46                                | 10                             | ↑       | No   | 100                           | ↓       | Yes  |
|        | Be           | 5.11                                 | 2                              | ↑       | No   | 60                            | ↓       | Yes  |
|        | Ag           | 24.74                                | 50                             | ↓       | Yes  | 100                           | ↓       | Yes  |
|        | Mn           | 2726.46                              | 100                            | ↑       | No   | 1500                          | ↑       | No   |
|        | CCB-R        | Cr                                   | 33.07                          | 50      | ↓    | Yes                           | 100     | ↓    |
| Ni     |              | 59.18                                | 20                             | ↑       | No   | 100                           | ↓       | Yes  |
| Cu     |              | 31.72                                | 1000                           | ↓       | Yes  | 1500                          | ↓       | Yes  |
| Zn     |              | 72.89                                | 1000                           | ↓       | Yes  | 5000                          | ↓       | Yes  |
| As     |              | 34.42                                | 10                             | ↑       | No   | 50                            | ↓       | Yes  |
| Cd     |              | 1.33                                 | 5                              | ↓       | Yes  | 10                            | ↓       | Yes  |
| Pb     |              | 14.73                                | 10                             | ↑       | No   | 100                           | ↓       | Yes  |

|        |    |         |      |   |     |      |   |     |
|--------|----|---------|------|---|-----|------|---|-----|
|        | Be | 4.41    | 2    | ↑ | No  | 60   | ↓ | Yes |
|        | Ag | 0.81    | 50   | ↓ | Yes | 100  | ↓ | Yes |
|        | Mn | 2030.73 | 100  | ↑ | No  | 1500 | ↑ | No  |
|        | Cr | 17.81   | 50   | ↓ | Yes | 100  | ↓ | Yes |
|        | Ni | 60.67   | 20   | ↑ | No  | 100  | ↓ | Yes |
|        | Cu | 18.76   | 1000 | ↓ | Yes | 1500 | ↓ | Yes |
|        | Zn | 51.74   | 1000 | ↓ | Yes | 5000 | ↓ | Yes |
| CCB-   | As | 20.10   | 10   | ↑ | No  | 50   | ↓ | Yes |
| N      | Cd | 1.12    | 5    | ↓ | Yes | 10   | ↓ | Yes |
|        | Pb | 10.94   | 10   | ↑ | No  | 100  | ↓ | Yes |
|        | Be | 3.74    | 2    | ↑ | No  | 60   | ↓ | Yes |
|        | Ag | 10.09   | 50   | ↓ | Yes | 100  | ↓ | Yes |
|        | Mn | 1232.00 | 100  | ↑ | No  | 1500 | ↓ | Yes |
|        | Cr | 101.22  | 50   | ↑ | No  | 100  | ↑ | No  |
|        | Ni | 23.97   | 20   | ↑ | No  | 100  | ↓ | Yes |
|        | Cu | 9.39    | 1000 | ↓ | Yes | 1500 | ↓ | Yes |
|        | Zn | 8.26    | 1000 | ↓ | Yes | 5000 | ↓ | Yes |
| CCB-   | As | 18.05   | 10   | ↑ | No  | 50   | ↓ | Yes |
| S      | Cd | 0.03    | 5    | ↓ | Yes | 10   | ↓ | Yes |
|        | Pb | 3.38    | 10   | ↓ | Yes | 100  | ↓ | Yes |
|        | Be | 0       | 2    | ↓ | Yes | 60   | ↓ | Yes |
|        | Ag | 2.93    | 50   | ↓ | Yes | 100  | ↓ | Yes |
|        | Mn | 635.95  | 100  | ↑ | No  | 1500 | ↓ | Yes |
|        | Cr | 21.00   | 50   | ↓ | Yes | 100  | ↓ | Yes |
|        | Ni | 57.67   | 20   | ↑ | No  | 100  | ↓ | Yes |
|        | Cu | 19.52   | 1000 | ↓ | Yes | 1500 | ↓ | Yes |
|        | Zn | 49.91   | 1000 | ↓ | Yes | 5000 | ↓ | Yes |
| CCB-RN | As | 21.63   | 10   | ↑ | No  | 50   | ↓ | Yes |
|        | Cd | 1.08    | 5    | ↓ | Yes | 10   | ↓ | Yes |
|        | Pb | 11.10   | 10   | ↑ | No  | 100  | ↓ | Yes |
|        | Be | 1.53    | 2    | ↓ | Yes | 60   | ↓ | Yes |
|        | Ag | 0.82    | 50   | ↓ | Yes | 100  | ↓ | Yes |
|        | Mn | 1289.49 | 100  | ↑ | No  | 1500 | ↓ | Yes |
|        | Cr | 17.03   | 50   | ↓ | Yes | 100  | ↓ | Yes |
|        | Ni | 50.46   | 20   | ↑ | No  | 100  | ↓ | Yes |
|        | Cu | 12.77   | 1000 | ↓ | Yes | 1500 | ↓ | Yes |
|        | Zn | 37.56   | 1000 | ↓ | Yes | 5000 | ↓ | Yes |
| CCB-   | As | 22.66   | 10   | ↑ | No  | 50   | ↓ | Yes |
| RS     | Cd | 1.02    | 5    | ↓ | Yes | 10   | ↓ | Yes |
|        | Pb | 10.82   | 10   | ↑ | No  | 100  | ↓ | Yes |
|        | Be | 0.77    | 2    | ↓ | Yes | 60   | ↓ | Yes |
|        | Ag | 1.23    | 50   | ↓ | Yes | 100  | ↓ | Yes |
|        | Mn | 957.99  | 100  | ↑ | No  | 1500 | ↓ | Yes |

|         |    |         |      |   |     |      |   |     |
|---------|----|---------|------|---|-----|------|---|-----|
| CCB-Rn  | Cr | 15.75   | 50   | ↓ | Yes | 100  | ↓ | Yes |
|         | Ni | 59.38   | 20   | ↑ | No  | 100  | ↓ | Yes |
|         | Cu | 12.95   | 1000 | ↓ | Yes | 1500 | ↓ | Yes |
|         | Zn | 40.29   | 1000 | ↓ | Yes | 5000 | ↓ | Yes |
|         | As | 26.85   | 10   | ↑ | No  | 50   | ↓ | Yes |
|         | Cd | 1.22    | 5    | ↓ | Yes | 10   | ↓ | Yes |
|         | Pb | 10.58   | 10   | ↑ | No  | 100  | ↓ | Yes |
|         | Be | 0.44    | 2    | ↓ | Yes | 60   | ↓ | Yes |
|         | Ag | 1.22    | 50   | ↓ | Yes | 100  | ↓ | Yes |
|         | Mn | 1451.47 | 100  | ↑ | No  | 1500 | ↓ | Yes |
| CCB-RNn | Cr | 28.13   | 50   | ↓ | Yes | 100  | ↓ | Yes |
|         | Ni | 61.94   | 20   | ↑ | No  | 100  | ↓ | Yes |
|         | Cu | 17.77   | 1000 | ↓ | Yes | 1500 | ↓ | Yes |
|         | Zn | 65.93   | 1000 | ↓ | Yes | 5000 | ↓ | Yes |
|         | As | 23.95   | 10   | ↑ | No  | 50   | ↓ | Yes |
|         | Cd | 1.35    | 5    | ↓ | Yes | 10   | ↓ | Yes |
|         | Pb | 14.12   | 10   | ↑ | No  | 100  | ↓ | Yes |
|         | Be | 1.82    | 2    | ↓ | Yes | 60   | ↓ | Yes |
|         | Ag | 5.27    | 50   | ↓ | Yes | 100  | ↓ | Yes |
|         | Mn | 1437.35 | 100  | ↑ | No  | 1500 | ↓ | Yes |
| CCB-RSn | Cr | 21.70   | 50   | ↓ | Yes | 100  | ↓ | Yes |
|         | Ni | 52.65   | 20   | ↑ | No  | 100  | ↓ | Yes |
|         | Cu | 12.47   | 1000 | ↓ | Yes | 1500 | ↓ | Yes |
|         | Zn | 36.01   | 1000 | ↓ | Yes | 5000 | ↓ | Yes |
|         | As | 20.73   | 10   | ↑ | No  | 50   | ↓ | Yes |
|         | Cd | 1.13    | 5    | ↓ | Yes | 10   | ↓ | Yes |
|         | Pb | 12.63   | 10   | ↑ | No  | 100  | ↓ | Yes |
|         | Be | 1.45    | 2    | ↓ | Yes | 60   | ↓ | Yes |
|         | Ag | 2.55    | 50   | ↓ | Yes | 100  | ↓ | Yes |
|         | Mn | 1058.61 | 100  | ↑ | No  | 1500 | ↓ | Yes |

\*Note: The concentrations of Cd in SG, and Cd and Be in CCB-S, were below the limit of detection (LOD).

**Table S3.** UCS of the modified samples

|          | CCB  | CCB-R | CCB-N | CCB-S | CCB-RN | CCB-RS | CCB-Rn | CCB-RNn | CCB-RSn |
|----------|------|-------|-------|-------|--------|--------|--------|---------|---------|
| Dried    | 5.70 | 5.41  | 5.01  | 8.64  | 6.03   | 6.52   | 6.27   | 5.99    | 7.48    |
| Immer-1  | 5.08 | 4.80  | 4.60  | 7.32  | 5.31   | 5.90   | 5.76   | 5.74    | 6.82    |
| Immer-3  | 5.62 | 5.20  | 5.10  | 9.03  | 5.74   | 6.37   | 5.83   | 5.97    | 7.65    |
| Immer-7  | 6.44 | 5.78  | 5.48  | 9.17  | 6.15   | 6.63   | 6.47   | 6.38    | 7.68    |
| Immer-14 | 6.65 | 5.65  | 5.64  | 9.79  | 6.30   | 6.63   | 6.53   | 6.41    | 7.90    |
| Immer-30 | 6.80 | 6.28  | 6.38  | 9.99  | 6.75   | 6.94   | 6.75   | 6.65    | 7.99    |
| Immer-60 | 6.01 | 6.68  | 5.88  | 10.07 | 6.89   | 7.45   | 7.26   | 6.92    | 8.34    |

**Table S4.** Porosity of the modified samples

|          | CCB   | CCB-R | CCB-N | CCB-S | CCB-RN | CCB-RS | CCB-Rn | CCB-RNn | CCB-RSn |
|----------|-------|-------|-------|-------|--------|--------|--------|---------|---------|
| Dried    | 27.16 | 30.17 | 30.57 | 30.97 | 30.29  | 30.37  | 29.80  | 29.93   | 30.05   |
| Immer-1  | 27.62 | 31.85 | 32.88 | 33.25 | 32.12  | 32.47  | 31.55  | 31.58   | 31.66   |
| Immer-3  | 27.36 | 30.80 | 31.90 | 31.96 | 31.29  | 31.83  | 30.38  | 30.54   | 30.71   |
| Immer-7  | 26.24 | 29.57 | 29.90 | 30.20 | 29.78  | 29.83  | 29.31  | 29.41   | 29.46   |
| Immer-14 | 26.01 | 29.23 | 29.50 | 29.83 | 29.29  | 29.33  | 28.57  | 28.84   | 29.14   |
| Immer-30 | 25.23 | 27.95 | 28.56 | 28.80 | 27.95  | 27.99  | 27.19  | 27.36   | 27.66   |
| Immer-60 | 24.68 | 27.04 | 27.54 | 28.09 | 27.16  | 27.48  | 26.72  | 26.83   | 26.89   |

**Table S5.** The pH change of the solution

|          | CCB   | CCB-R | CCB-N | CCB-S | CCB-RN | CCB-RS | CCB-Rn | CCB-RNn | CCB-RSn | FA   | SG    |
|----------|-------|-------|-------|-------|--------|--------|--------|---------|---------|------|-------|
| Initial  | 7.33  | 7.33  | 7.33  | 7.33  | 7.33   | 7.33   | 7.33   | 7.33    | 7.33    | 7.33 | 7.33  |
| Immer-1  | 9.31  | 9.23  | 8.81  | 9.20  | 9.36   | 9.10   | 9.11   | 8.83    | 8.75    | 9.12 | 8.65  |
| Immer-3  | 10.41 | 10.18 | 9.87  | 10.37 | 10.40  | 10.40  | 10.46  | 10.33   | 9.89    | 9.08 | 9.34  |
| Immer-7  | 10.67 | 10.59 | 10.69 | 10.66 | 10.61  | 10.67  | 10.64  | 10.67   | 10.68   | 8.74 | 10.59 |
| Immer-14 | 9.51  | 9.45  | 9.77  | 9.54  | 9.64   | 9.65   | 9.86   | 9.51    | 9.58    | 8.30 | 10.76 |
| Immer-30 | 9.28  | 9.13  | 9.35  | 9.30  | 9.22   | 9.32   | 9.50   | 9.19    | 9.20    | 8.18 | 10.74 |
| Immer-60 | 8.70  | 8.63  | 8.76  | 8.79  | 8.68   | 8.80   | 8.82   | 8.76    | 8.74    | 8.12 | 10.68 |

**Table S6.** Percentage reduction in heavy metal leaching across different modified CCB groups

| Sample  | Results              | Cr      | Ni      | Cu      | Zn      | As      | Cd      | Pb      | Be       | Ag      | Mn      | Average rate of change |
|---------|----------------------|---------|---------|---------|---------|---------|---------|---------|----------|---------|---------|------------------------|
| CCB     | Concentration (µg/L) | 144.47  | 93.22   | 59.49   | 81.00   | 27.80   | 1.61    | 18.46   | 5.11     | 24.74   | 2726.46 | /                      |
| CCB-R   | Concentration (µg/L) | 33.07   | 59.18   | 31.72   | 72.89   | 34.42   | 1.33    | 14.73   | 4.41     | 0.81    | 2030.73 | /                      |
|         | Rate of change       | -77.11% | -36.51% | -46.68% | -10.01% | 23.78%  | -17.79% | -20.19% | -13.83%  | -96.71% | -25.52% | -32.06%                |
| CCB-N   | Concentration (µg/L) | 17.81   | 60.67   | 18.76   | 51.74   | 20.10   | 1.12    | 10.94   | 3.74     | 10.09   | 1232.00 | /                      |
|         | Rate of change       | -87.68% | -34.92% | -68.46% | -36.13% | -27.69% | -30.72% | -40.74% | -26.95%  | -59.20% | -54.81% | -46.73%                |
| CCB-S   | Concentration (µg/L) | 101.22  | 23.97   | 9.39    | 8.26    | 18.05   | 0.03    | 3.38    | 0        | 2.93    | 635.95  | /                      |
|         | Rate of change       | -29.94% | -74.29% | -84.21% | -89.80% | -35.09% | -97.95% | -81.67% | -100.00% | -88.17% | -76.68% | -75.78%                |
| CCB-RN  | Concentration (µg/L) | 21.00   | 57.67   | 19.52   | 49.91   | 21.63   | 1.08    | 11.10   | 1.53     | 0.82    | 1289.49 | /                      |
|         | Rate of change       | -85.46% | -38.13% | -67.19% | -38.37% | -22.21% | -33.15% | -39.84% | -70.03%  | -96.69% | -52.70% | -54.38%                |
| CCB-RS  | Concentration (µg/L) | 17.03   | 50.46   | 12.77   | 37.56   | 22.66   | 1.02    | 10.82   | 0.77     | 1.23    | 957.99  | /                      |
|         | Rate of change       | -88.21% | -45.87% | -78.53% | -53.70% | -18.49% | -36.56% | -41.38% | -84.89%  | -95.01% | -64.86% | -60.75%                |
| CCB-Rn  | Concentration (µg/L) | 15.75   | 59.38   | 12.95   | 40.29   | 26.85   | 1.22    | 10.58   | 0.44     | 1.22    | 1451.47 | /                      |
|         | Rate of change       | -89.10% | -36.30% | -78.23% | -50.25% | -3.43%  | -24.33% | -42.68% | -91.49%  | -95.06% | -46.76% | -55.76%                |
| CCB-RNn | Concentration (µg/L) | 28.13   | 61.94   | 17.77   | 65.93   | 23.95   | 1.35    | 14.12   | 1.82     | 5.27    | 1437.35 | /                      |
|         | Rate of change       | -80.53% | -33.55% | -70.13% | -18.60% | -13.85% | -16.08% | -23.51% | -64.35%  | -78.69% | -47.28% | -44.66%                |
| CCB-RSn | Concentration (µg/L) | 21.70   | 52.65   | 12.47   | 36.01   | 20.73   | 1.13    | 12.63   | 1.45     | 2.55    | 1058.61 | /                      |
|         | Rate of change       | -84.98% | -43.52% | -79.03% | -55.54% | -25.45% | -29.96% | -31.60% | -71.58%  | -89.70% | -61.17% | -57.25%                |

**Table S7.** Comparison of heavy metal immobilization efficiency with previous works

| Application Field    | Main Modifiers/ Materials                                                                                        | Target Heavy Metals            | Matrix/ Environment         | Immobilization / Removal Efficiency                         | Reference |
|----------------------|------------------------------------------------------------------------------------------------------------------|--------------------------------|-----------------------------|-------------------------------------------------------------|-----------|
| Soil Remediation     | nano-CaO<br>(11.9% mass ratio)                                                                                   | As(III),<br>Cd(II), Pb(II)     | Agricultural soil           | 95% - 99%                                                   | 1         |
| Soil Remediation     | nano-CaCO <sub>3</sub><br>(1.48% - 1.88% mass ratio)                                                             | Cd(II), Pb(II)                 | Acidic soils                | 97% - 100%                                                  | 2         |
| Soil Remediation     | Sepiolite<br>(20% dosage)                                                                                        | Pb, Cd                         | Alkaline soils              | 35% - 54%                                                   | 3, 4      |
| Soil Remediation     | BC-nZVI<br>(100 mg/kg)                                                                                           | As, Cd, Cr(VI)                 | High-organic soils          | 95.6% - 99.8%                                               | 5, 6      |
| Soil Remediation     | nZVI<br>(10% mass ratio)                                                                                         | Cr(VI), Pb(II)                 | Neutral/weakly acidic soils | 95% - 95.6%                                                 | 7-9       |
| Soil Remediation     | Organic-inorganic composite of chitosan, nanoclay, and biochar<br>(10 mg/mL)                                     | Cu, Pb, Zn                     | Acidic soils                | Cu(II) (100%), Zn(II) (100%), Pb(II) (52.29%)               | 10        |
| Wastewater Treatment | Al <sub>2</sub> O <sub>3</sub> -supported nano-FeS<br>(30% mass ratio of FeS to Al <sub>2</sub> O <sub>3</sub> ) | Hg(II)                         | mercury-contaminated water  | 313 mg/g                                                    | 11        |
| Wastewater Treatment | Sepiolite<br>(25 mg dosage)                                                                                      | Pb(II)                         | Aqueous solution            | 105.57 mg/g                                                 | 12        |
| Wastewater Treatment | magnetic halloysite/coconut shell biochar composites<br>(HNTs:CS:Fe <sub>3</sub> O <sub>4</sub> = 1:2:9)         | Pb(II)                         | Aqueous solution            | 833.33 ± 16.71 mg/g                                         | 13        |
| Wastewater Treatment | Clinoptilolite<br>(0.3g/g-phosphoric acid)                                                                       | Pb(II)                         | phosphoric acid medium      | 91.70%                                                      | 14        |
| Wastewater Treatment | Bismuth-impregnated straw biochar<br>(2 mg/mL)                                                                   | As(III), Cr(VI)                | wastewater pollution        | As(III) (16.21 mg/g), Cr(VI) (12.23 mg/g)                   | 15        |
| Wastewater Treatment | ZnO/ZnS-modified corn stover biochar<br>(2 mg/mL)                                                                | Pb(II), Cu(II), Cr(VI)         | heavy metal solution        | Pb(II) (135.8 mg/g), Cu(II) (91.2 mg/g), Cr(VI) (24.5 mg/g) | 16        |
| Wastewater Treatment | Fe <sub>2</sub> O <sub>3</sub> – Al <sub>2</sub> O <sub>3</sub> nanocomposite fiber<br>(2.5 mg/mL)               | Cu(II), Ni(II), Pb(II), Hg(II) | heavy metal solution        | Cu(II) (21%), Pb(II) (52%), Ni(II) (67%), Hg(II) (89%)      | 17        |
| Solid Waste Backfill | nano-Al <sub>2</sub> O <sub>3</sub><br>(1% mass ratio)                                                           | Zn, Pb, Ba, Cr                 | Backfill                    | complied with the Class III groundwater standard            | 18        |

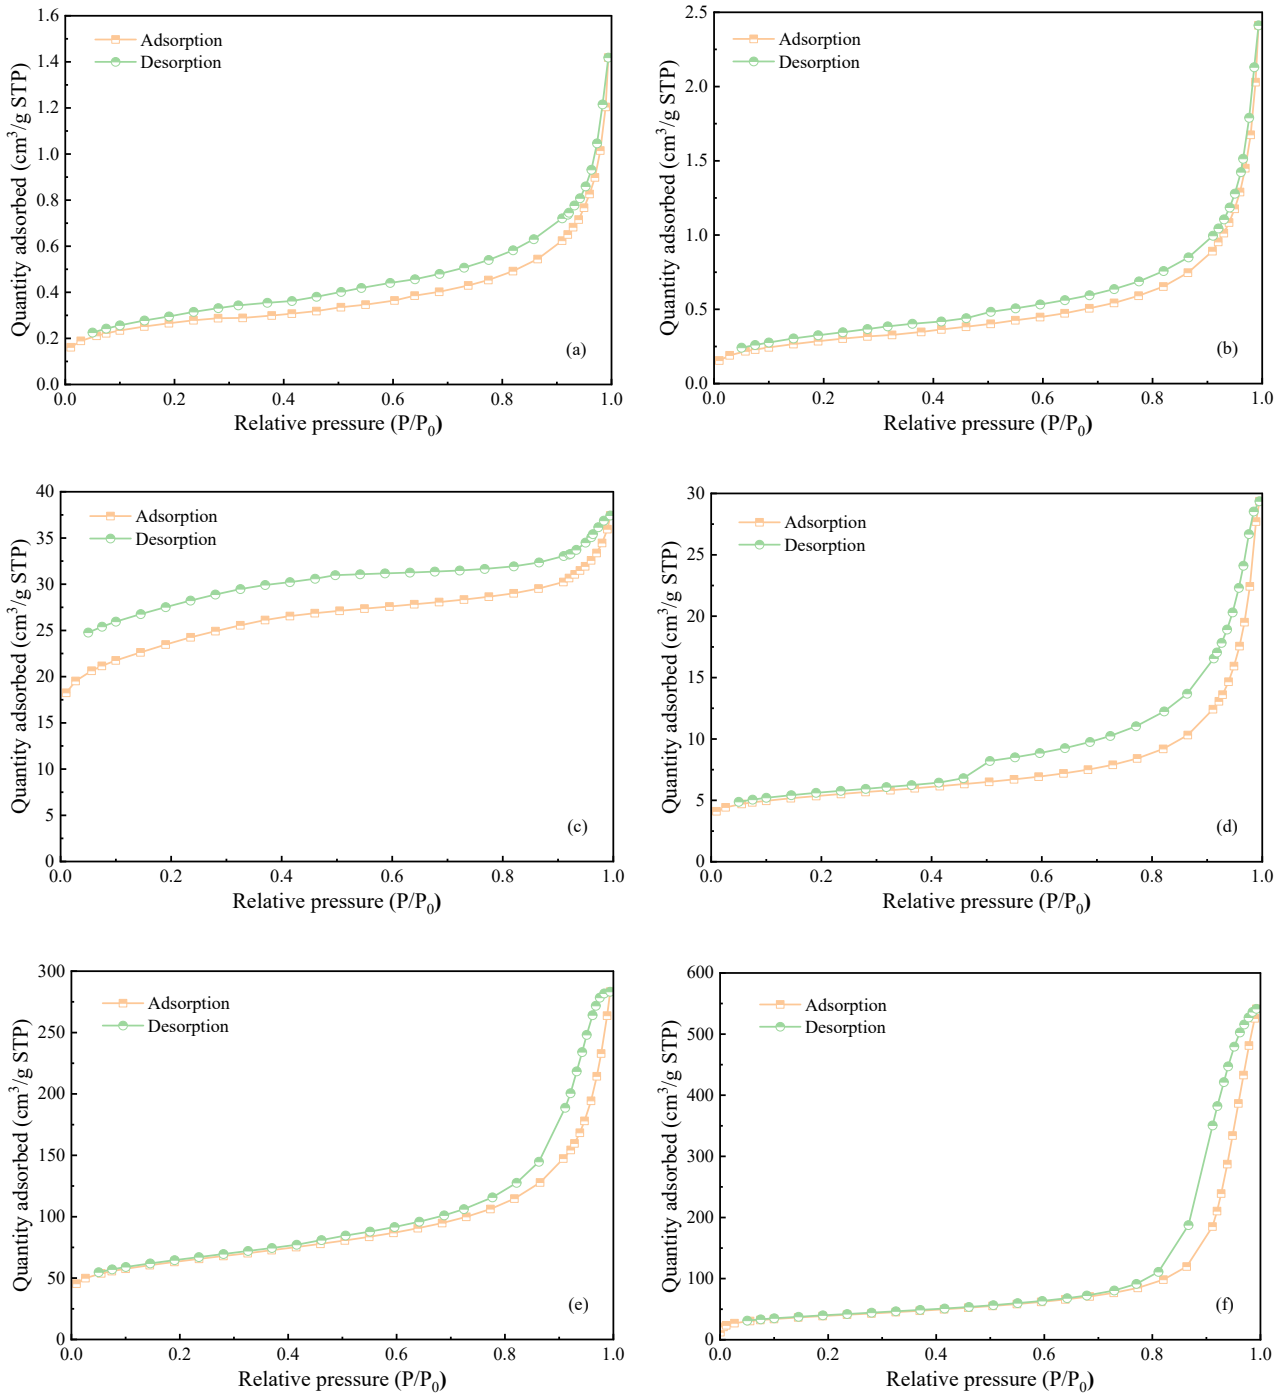

**Fig. S1.**  $N_2$  adsorption-desorption isotherms of the different materials: (a) FA, (b) SG, (c) RHB, (d) NCP, (e) SEP, and (f) NA

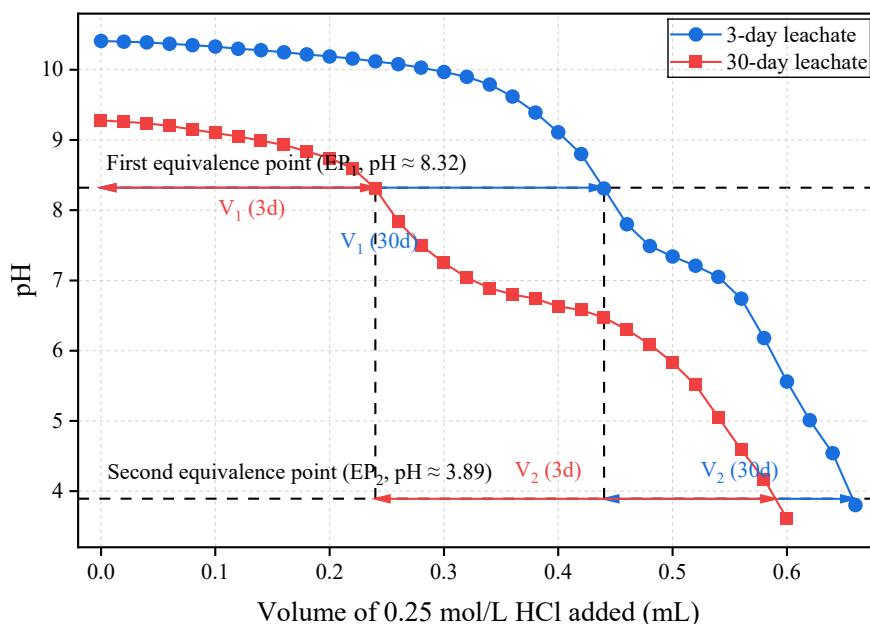

**Fig. S2.** Acid-base titration curve

### Acid-base Titration Experiment and Analysis:

#### 1. Experimental procedure

Acid-base titration experiments were conducted on the CCB leachates after 3 days (initial pH = 10.41) and 30 days (initial pH = 9.28) of soaking. For each group, 100 mL of the leachate was extracted and titrated using a 0.25 mol/L standard HCl solution. The titration was performed in precise increments of 20  $\mu$ L.

#### 2. Results and analysis

(1)  $V_1$  and the consumption of  $\text{OH}^-$ : The volume of HCl required to reach the first equivalence point (EP<sub>1</sub>, pH  $\approx$  8.32), denoted as  $V_1$ , decreased from 0.44 mL (3-day) to 0.24 mL (30-day). This significant decrease in  $V_1$  (approximately 45%) quantitatively demonstrates that the free  $\text{OH}^-$  in the solution was consumed by the continuous internal hydration and pozzolanic reactions within the matrix.

(2)  $V_2$  and the variation of carbonates: With prolonged soaking time,  $V_2$ , which represents the total carbonate content, exhibited only a marginal increase. The volume of HCl consumed increased from 0.22 mL (3-day, corresponding to a carbonate concentration of 0.55 mmol/L) to 0.36 mL (30-day, corresponding to a carbonate concentration of 0.90 mmol/L). If the substantial pH drop from 10.41 to 9.28 were primarily caused by a massive dissolution of external atmospheric  $\text{CO}_2$ , the increase in  $V_2$  would have been significantly larger. Furthermore, since the slight increase in  $V_2$  could

also be attributed to the weak dissolution of inherent carbonates within the solid material, the actual impact of external CO<sub>2</sub> ingress should be considered more modest.

Based on the physical sealing measures implemented during the experiment and the newly supplemented acid-base titration data, it can be concluded that the decline in pH is primarily attributed to the consumption of OH<sup>-</sup> by ongoing hydration reactions, rather than interference from atmospheric CO<sub>2</sub>.

## References

- 1 S.R. Mallampati, Y. Mitoma, T. Okuda, S. Sakita and C. Simion, Simultaneous decontamination of cross-polluted soils with heavy metals and PCBs using a nano-metallic Ca/CaO dispersion mixture, *Environ. Sci. Pollut. Res.*, 2014, **21**, 9270-9277.
- 2 L. Renlu, G. Yong, C. Liang and L. Bin, Adsorption and Desorption Characteristics of Cd<sup>2+</sup> and Pb<sup>2+</sup> by Micro and Nano-sized Biogenic CaCO<sub>3</sub>, *Front. Microbiol.*, 2018, **9**.
- 3 Y. Sun, G. Sun, Y. Xu, L. Wang, X. Liang and D. Lin, Assessment of sepiolite for immobilization of cadmium-contaminated soils, *Geoderma*, 2013, **193-194**, 149-155.
- 4 Q. Zhu, D. Huang, S. Liu, B. Zhou, Z. Luo and H. Zhu, Flooding-enhanced immobilization effect of sepiolite on cadmium in paddy soil, *J. Soils Sediments*, 2012, **12**, 169-177.
- 5 Y. Sun, F. Zheng, W. Wang, S. Zhang and F. Wang, Remediation of Cr(VI)-Contaminated Soil by Nano-Zero-Valent Iron in Combination with Biochar or Humic Acid and the Consequences for Plant Performance, *Toxics*, 2020, **8**, 26.
- 6 Z. Arabi, J. Rinklebe, A. El-Naggar, D. Hou, A.K. Sarmah and E. Moreno-Jiménez, (Im)mobilization of arsenic, chromium, and nickel in soils via biochar: A meta-analysis, *Environ. Pollut.*, 2021, **286**, 117199.
- 7 W. Zhou, F. Liu, S. Yi, Y. Chen, X. Geng and C. Zheng, Simultaneous stabilization of Pb and improvement of soil strength using nZVI, *Sci. Total Environ.*, 2019, **651**, 877-884.
- 8 S. Guo, H. Yang, Q. Sun, G. Zhang, T. Zhao, Y. Zhou, X. Li and P. Gao, Evaluation of a novel carbon-based micro-nano zero-valent iron composite for immobilization of heavy metals in soil, *Journal of Environmental Chemical Engineering*, 2023, **11**, 109740.
- 9 L. Di Palma, M.T. Gueye and E. Petrucci, Hexavalent chromium reduction in contaminated soil: A comparison between ferrous sulphate and nanoscale zero-valent iron, *J. Hazard. Mater.*, 2015, **281**, 70-76.
- 10 H. Arabyarmohammadi, A.K. Darban, M. Abdollahy, R. Yong, B. Ayati, A. Zirakjou and S.E.A.T. van der Zee, Utilization of a Novel Chitosan/Clay/Biochar Nanobiocomposite for Immobilization of Heavy Metals in Acid Soil Environment, *J. Polym. Environ.*, 2018, **26**, 2107-2119.
- 11 Y. Sun, Z. Lou, J. Yu, X. Zhou, D. Lv, J. Zhou, S.A. Baig and X. Xu, Immobilization of mercury (II) from aqueous solution using Al<sub>2</sub>O<sub>3</sub>-supported nanoscale FeS, *Chem. Eng. J.*, 2017, **323**, 483-491.
- 12 H. Xie, S. Zhang, J. Liu, J. Hu and A. Tang, A Novel Calcium Oxalate/Sepiolite Composite for Highly Selective Adsorption of Pb(II) from Aqueous Solutions, *Minerals*, 2021, **11**, 552.
- 13 S. Wang, D. Xiao, X. Zheng, L. Zheng, Y. Yang, H. Zhang, B. Ai and Z. Sheng, Halloysite and coconut shell biochar magnetic composites for the sorption of Pb(II) in wastewater: Synthesis, characterization and mechanism investigation, *Journal of Environmental Chemical Engineering*, 2021, **9**, 106865.
- 14 M.Z. Kussainova, R.M. Chernyakova, U.Z. Jussipbekov and S. Paşa, Structural investigation of raw clinoptilolite over the Pb<sup>2+</sup> adsorption process from phosphoric acid, *J. Mol. Struct.*, 2019, **1184**, 49-58.
- 15 N. Zhu, T. Yan, J. Qiao and H. Cao, Adsorption of arsenic, phosphorus and chromium by bismuth impregnated biochar: Adsorption mechanism and depleted adsorbent utilization, *Chemosphere*, 2016, **164**, 32-40.
- 16 C. Li, L. Zhang, Y. Gao and A. Li, Facile synthesis of nano ZnO/ZnS modified biochar by directly pyrolyzing of zinc contaminated corn stover for Pb(II), Cu(II) and Cr(VI) removals, *Waste Manage.*, 2018, **79**, 625-637.
- 17 A. Mahapatra, B.G. Mishra and G. Hota, Electrospun Fe<sub>2</sub>O<sub>3</sub>-Al<sub>2</sub>O<sub>3</sub> nanocomposite fibers as efficient adsorbent for removal of heavy metal ions from aqueous solution, *J. Hazard. Mater.*, 2013, **258-259**, 116-123.
- 18 B. Zhang, D. Chen, B. Han, Y. Hu and K. Li, The exploration of effect for nano-Al<sub>2</sub>O<sub>3</sub> on solid waste based superfine tailings cemented paste backfill: Pyrolysis property, hydration mechanism and environmental risk, *Constr. Build. Mater.*, 2024, **452**, 139035.
